# Supplementary material for: Synthesis of benzo[4,5]imidazo[1,2-a]quinoxalines by I2-mediated sp3 C–H amination
Source: Royal Society of Chemistry journal article supplement (doi:10.1039/d0qo01101k), 2020-01-01

# Synthesis of Benzo[4,5]imidazo[1,2-*a*]quinoxalines by I<sub>2</sub>-Mediated *sp*<sup>3</sup> C–H Amination

Wenjun Chen, Yangxu Du, Manman Wang, Yingchao Fang, Wenquan Yu,\* and  
Junbiao Chang\*

*Green Catalysis Center, and College of Chemistry, Zhengzhou University, Zhengzhou, Henan  
Province 450001, China.*

## CONTENTS:

|                                                             |     |
|-------------------------------------------------------------|-----|
| 1. General Information                                      | S2  |
| 2. Preparation of Nitro Compounds <b>3</b>                  | S2  |
| 3. Preparation of Substrates <b>1</b>                       | S4  |
| 4. General Procedure for the Synthesis of Products <b>2</b> | S13 |
| 5. References                                               | S22 |
| 6. NMR Spectra of Isolated Compounds                        | S23 |

**1. General Information.**  $^1\text{H}$  and  $^{13}\text{C}$  NMR spectra were recorded on a 400 MHz (100 MHz for  $^{13}\text{C}$  NMR) spectrometer. Chemical shift values are reported in ppm (parts per million) with tetramethylsilane (TMS) as an internal standard. The peak patterns are indicated as follows: s, singlet; d, doublet; t, triplet; q, quartet; m, multiplet; dd, doublet of doublets; dt, doublet of triplets. The coupling constants ( $J$ ) are reported in Hertz (Hz). Melting points were determined on a micromelting point apparatus and are uncorrected. High-resolution mass spectra (HRMS) were obtained on a Q-TOF Mass Spectrometer equipped with an electrospray ion source (ESI), and operated in the positive mode. Flash column chromatography was performed over 200-300 mesh silica gel. Toluene used in the synthesis of products **2** was analytical reagent grade and used without any pretreatment.

**2. Preparation of Nitro Compounds 3.** The required nitro compounds **3** for the preparation of substrates **1** were synthesized as follows:

**2.1. Method A.** Using the synthesis of **3a** as an example, a reaction mixture of 1-fluoro-2-nitrobenzene (776 mg, 5.5 mmol) and 1,2-diaminobenzene (542 mg, 5 mmol) in DMSO (10 mL) was stirred at 130 °C for 8 h.<sup>1</sup> After cooling to room temperature, it was quenched with H<sub>2</sub>O (10 mL) and extracted with EtOAc (3 × 20 mL). The combined organic layer was washed with brine (3 × 10 mL), dried over anhydrous Na<sub>2</sub>SO<sub>4</sub>, concentrated and purified through silica gel chromatography (EtOAc/petroleum ether (PE) 6:94) to give *N*<sup>1</sup>-(2-nitrophenyl)benzene-1,2-diamine as a reddish brown solid (951 mg, 83% yield).

EDCI (1.2 g, 6 mmol) and DMAP (184 mg, 1.5 mmol) were added in sequence to a mixture of phenylacetic acid (409 mg, 3 mmol) and *N*<sup>1</sup>-(2-nitrophenyl)benzene-1,2-diamine (757 mg, 3.3 mmol) in CH<sub>2</sub>Cl<sub>2</sub> (10 mL). The

reaction mixture was stirred at room temperature for 5 h, then quenched with H<sub>2</sub>O (10 mL), and extracted with CH<sub>2</sub>Cl<sub>2</sub> (3 × 20 mL). The combined organic layer was dried over anhydrous Na<sub>2</sub>SO<sub>4</sub>, concentrated and purified through silica gel chromatography (EtOAc/PE 8:92) to give *N*-(2-((2-nitrophenyl)amino)phenyl)-2-phenylacetamide as a yellow solid (1.02 g, 98% yield).

A mixture of *N*-(2-((2-nitrophenyl)amino)phenyl)-2-phenylacetamide (696 mg, 2 mmol) in POCl<sub>3</sub> (5 mL) was refluxed for 1 h.<sup>2</sup> After cooling to 0 °C, the reaction was quenched and basified by sat. NaHCO<sub>3</sub>, and then extracted with CH<sub>2</sub>Cl<sub>2</sub> (3 × 20 mL). The combined organic layer was dried over anhydrous Na<sub>2</sub>SO<sub>4</sub>, concentrated, and purified through silica gel chromatography (EtOAc/PE 12:88) to give nitro compound **3a** as a yellow solid (659 mg, 97% yield). Compounds **3b–3n** and **3q–3z** were prepared using this method.

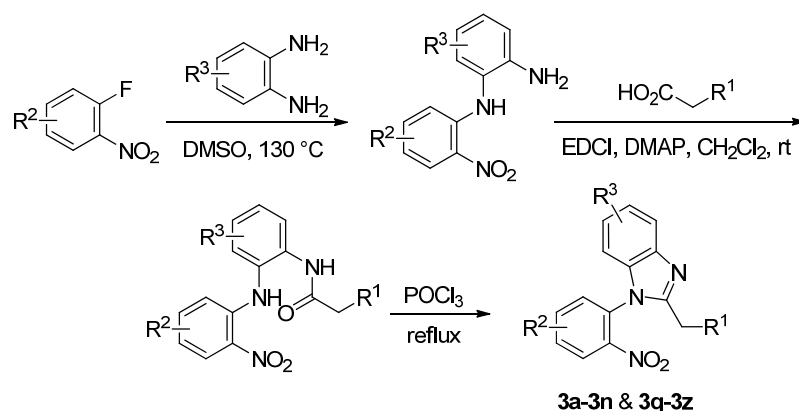

**2.2. Method B.** Using the synthesis of **3o** as an example, a mixture of 1-fluoro-2-nitrobenzene (567 mg, 4 mmol) and 2-methyl-1*H*-benzo[*d*]imidazole (632 mg, 4.8 mmol) in DMSO (10 mL) was treated with NaOH (236 mg, 6 mmol). The reaction mixture was stirred at room temperature for 3 h and upon completion the reaction mixture was neutralized with 1 M HCl and extracted with EtOAc (3 × 20 mL). The combined organic layer was washed with brine (3 × 10 mL), dried over

anhydrous  $\text{Na}_2\text{SO}_4$ , concentrated, and purified through silica gel chromatography (EtOAc/PE 33:67) to give nitro compound **3o** as a yellow solid (1.0 g, 99% yield). Compound **3p** was synthesized similarly.

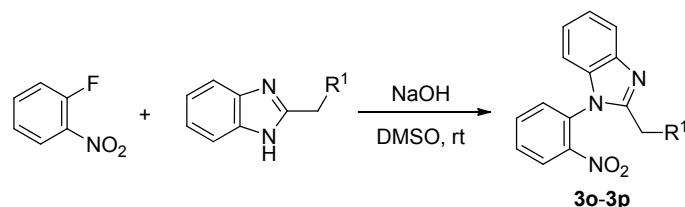

### 3. Preparation of Substrates 1.

**3.1. Method C.** The corresponding nitro compound **3** (2 mmol) was added to a stirred mixture of  $\text{SnCl}_2 \cdot 2\text{H}_2\text{O}$  (1.4 g, 6 mmol) in conc. HCl (10 mL). Then the reaction mixture was heated at 60 °C until TLC indicated the completion of the reaction. After cooling to 0 °C, sat. NaOH was added slowly to the reaction mixture to adjust the pH to 9-10, and then it was extracted with EtOAc (3 × 20 mL). The combined organic layer was dried over anhydrous  $\text{Na}_2\text{SO}_4$ , concentrated and purified through silica gel chromatography to afford substrates **1a**, **1c–1d**, **1h–1j**, **1l**, **1n–1q** and **1s–1y**.

**3.2. Method D.** A mixture of the corresponding nitro compound **3** (2 mmol) and 10% Pd/C (150 mg) in MeOH (50 mL) was hydrogenated under 3 atm of  $\text{H}_2$  for 12 h. The catalyst was filtered off and the filtrate was concentrated and purified through silica gel chromatography to afford substrates **1b**, **1e–1g**, **1k**, **1m**, **1r**, and **1z**.

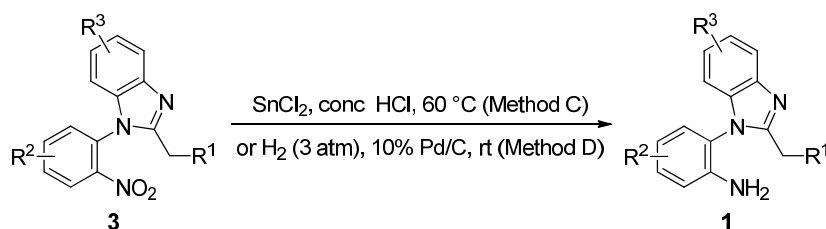

**2-(2-Benzyl-1H-benzo[d]imidazol-1-yl)aniline (1a).** 5 h; eluent: EtOAc/PE 17:83; 479 mg, 80% yield; white solid, mp 157-158 °C;  $^1\text{H}$  NMR (400 MHz,  $\text{CDCl}_3$ )  $\delta$  7.82



(d,  $J = 8.0$  Hz, 1H), 7.30-7.26 (m, 2H, overlapped with the peak of chloroform), 7.21-7.14 (m, 4H), 7.04-7.00 (m, 3H), 6.92 (dd,  $J = 8.0, 1.2$  Hz, 1H), 6.81-6.78 (m, 2H), 4.16-4.08 (m, 2H), 3.23 (s, 2H);  $^{13}\text{C}$  NMR (100 MHz,  $\text{CDCl}_3$ )  $\delta$  154.1, 143.6, 142.8, 136.2, 135.7, 130.5, 129.3, 128.8, 128.3, 126.6, 122.9, 122.5, 120.6, 119.5, 118.7, 116.4, 110.2, 34.4; HRMS (ESI-TOF)  $m/z$ :  $[\text{M} + \text{H}]^+$  calcd for  $\text{C}_{20}\text{H}_{18}\text{N}_3$  300.1495, found 300.1494.

**2-(2-(4-Methylbenzyl)-1H-benzo[d]imidazol-1-yl)aniline (1b).** 12 h; eluent: EtOAc/PE 7:93; 595 mg, 95% yield; white solid, mp 168-169 °C;  $^1\text{H}$  NMR (400 MHz,  $\text{CDCl}_3$ )  $\delta$  7.81 (d,  $J = 8.0$  Hz, 1H), 7.30-7.24 (m, 2H, overlapped with the peak of chloroform), 7.19-7.15 (m, 1H), 7.00-6.91 (m, 6H), 6.81-6.77 (m, 2H), 4.11-4.01 (m, 2H), 3.28 (s, 2H), 2.25 (s, 3H);  $^{13}\text{C}$  NMR (100 MHz,  $\text{CDCl}_3$ )  $\delta$  154.5, 143.7, 142.9, 136.2, 135.7, 133.2, 130.5, 129.4, 129.1, 128.8, 122.8, 122.5, 120.7, 119.6, 118.7, 116.5, 110.3, 33.9, 21.1; HRMS (ESI-TOF)  $m/z$ :  $[\text{M} + \text{H}]^+$  calcd for  $\text{C}_{21}\text{H}_{20}\text{N}_3$  314.1652, found 314.1653.

**2-(2-(4-Methoxybenzyl)-1H-benzo[d]imidazol-1-yl)aniline (1c).** 4.5 h; eluent: EtOAc/PE 28:72; 501 mg, 76% yield; white solid, mp 181-182 °C;  $^1\text{H}$  NMR (400 MHz,  $\text{CDCl}_3$ )  $\delta$  7.82 (d,  $J = 8.0$  Hz, 1H), 7.32-7.26 (m, 2H, overlapped with the peak of chloroform), 7.21-7.17 (m, 1H), 7.01 (d,  $J = 8.0$  Hz, 1H), 6.96-6.93 (m, 3H), 6.83-6.80 (m, 2H), 6.70 (d,  $J = 8.4$  Hz, 2H), 4.11-4.02 (m, 2H), 3.74 (s, 3H), 3.24 (s, 2H);  $^{13}\text{C}$  NMR (100 MHz,  $\text{CDCl}_3$ )  $\delta$  158.3, 154.5, 143.7, 142.9, 135.7, 130.5, 129.9, 129.4, 128.4, 122.9, 122.5, 120.7, 119.6, 118.8, 116.5, 113.8, 110.2, 55.3, 33.5; HRMS (ESI-TOF)  $m/z$ :  $[\text{M} + \text{H}]^+$  calcd for  $\text{C}_{21}\text{H}_{20}\text{N}_3\text{O}$  330.1601, found 330.1600.

**2-(2-(4-Fluorobenzyl)-1H-benzo[d]imidazol-1-yl)aniline (1d).** 4 h; eluent: EtOAc/PE 25:75; 584 mg, 92% yield; white solid, mp 173-174 °C;  $^1\text{H}$  NMR (400 MHz,  $\text{DMSO}-d_6$ )  $\delta$  7.65 (d,  $J = 8.0$  Hz, 1H), 7.25-7.12 (m, 5H), 7.04 (t,  $J = 9.2$  Hz,

2H), 6.95-6.89 (m, 3H), 6.66-6.62 (m, 1H), 5.00 (s, 2H), 4.09-3.93 (m, 2H);  $^{13}\text{C}$  NMR (100 MHz, DMSO- $d_6$ )  $\delta$  161.4 (d,  $J_{\text{C-F}} = 240.5$  Hz), 154.3, 145.6, 143.2, 136.2, 133.4 (d,  $J_{\text{C-F}} = 3.0$  Hz), 131.2 (d,  $J_{\text{C-F}} = 8.1$  Hz), 130.6, 129.4, 122.7, 122.2, 119.4, 119.2, 116.7, 116.5, 115.3 (d,  $J_{\text{C-F}} = 21.1$  Hz), 110.6, 33.0; HRMS (ESI-TOF)  $m/z$ :  $[\text{M} + \text{H}]^+$  calcd for  $\text{C}_{20}\text{H}_{17}\text{FN}_3$  318.1401, found 318.1402.

**2-(2-(4-Chlorobenzyl)-1H-benzo[d]imidazol-1-yl)aniline (1e).** 12 h; eluent: EtOAc/PE 9:91; 641 mg, 96% yield; white solid, mp 170-171 °C;  $^1\text{H}$  NMR (400 MHz,  $\text{CDCl}_3$ )  $\delta$  7.81 (d,  $J = 8.0$  Hz, 1H), 7.32-7.26 (m, 2H), 7.22-7.18 (m, 1H), 7.13 (d,  $J = 8.4$  Hz, 2H), 7.02 (d,  $J = 8.0$  Hz, 1H), 6.97 (d,  $J = 8.4$  Hz, 2H), 6.91 (dd,  $J = 8.0, 1.6$  Hz, 1H), 6.84-6.79 (m, 2H), 4.13-4.03 (m, 2H), 3.32 (s, 2H);  $^{13}\text{C}$  NMR (100 MHz,  $\text{CDCl}_3$ )  $\delta$  153.6, 143.6, 142.8, 135.6, 134.7, 132.5, 130.7, 130.2, 129.3, 128.5, 123.1, 122.7, 120.4, 119.6, 118.8, 116.5, 110.3, 33.8; HRMS (ESI-TOF)  $m/z$ :  $[\text{M} + \text{H}]^+$  calcd for  $\text{C}_{20}\text{H}_{17}\text{ClN}_3$  334.1106, found 334.1108.

**2-(2-(4-Bromobenzyl)-1H-benzo[d]imidazol-1-yl)aniline (1f).** 12 h; eluent: EtOAc/PE 14:86; 743 mg, 98% yield; white solid, mp 157-158 °C;  $^1\text{H}$  NMR (400 MHz,  $\text{CDCl}_3$ )  $\delta$  7.81 (d,  $J = 8.0$  Hz, 1H), 7.32-7.27 (m, 4H), 7.21 (dt,  $J = 8.0, 0.8$  Hz, 1H), 7.02 (d,  $J = 8.0$  Hz, 1H), 6.93-6.91 (m, 3H), 6.84-6.79 (m, 2H), 4.12-4.02 (m, 2H), 3.31 (s, 2H);  $^{13}\text{C}$  NMR (100 MHz,  $\text{CDCl}_3$ )  $\delta$  153.5, 143.5, 142.8, 135.6, 135.2, 131.4, 130.65, 135.57, 129.2, 123.0, 122.6, 120.6, 120.4, 119.6, 118.8, 116.4, 110.2, 33.8; HRMS (ESI-TOF)  $m/z$ :  $[\text{M} + \text{H}]^+$  calcd for  $\text{C}_{20}\text{H}_{17}\text{BrN}_3$  378.0600, found 378.0603.

**2-(2-(4-Iodobenzyl)-1H-benzo[d]imidazol-1-yl)aniline (1g).** 12 h; eluent: EtOAc/PE 9:91; 808 mg, 95% yield; white solid, mp 163-164 °C;  $^1\text{H}$  NMR (400 MHz,  $\text{CDCl}_3$ )  $\delta$  7.81 (d,  $J = 8.0$  Hz, 1H), 7.49 (d,  $J = 8.0$  Hz, 2H), 7.32-7.27 (m, 2H, overlapped with the peak of chloroform), 7.20 (t,  $J = 7.6$  Hz, 1H), 7.02 (d,  $J = 8.0$  Hz, 1H), 6.92 (d,  $J =$

7.6 Hz, 1H), 6.84-6.79 (m, 4H), 4.10-4.00 (m, 2H), 3.31 (s, 2H);  $^{13}\text{C}$  NMR (100 MHz,  $\text{CDCl}_3$ )  $\delta$  153.5, 143.5, 142.8, 137.4, 136.0, 135.6, 130.9, 130.7, 129.3, 123.1, 122.7, 120.4, 119.6, 118.8, 116.5, 110.3, 92.2, 33.9; HRMS (ESI-TOF)  $m/z$ :  $[\text{M} + \text{H}]^+$  calcd for  $\text{C}_{20}\text{H}_{17}\text{IN}_3$  426.0462, found 426.0463.

**2-(2-(4-(Trifluoromethyl)benzyl)-1H-benzo[d]imidazol-1-yl)aniline (1h).** 2.5 h; eluent: EtOAc/PE 25:75; 441 mg, 60% yield; white solid, mp 143-144 °C;  $^1\text{H}$  NMR (400 MHz,  $\text{CDCl}_3$ )  $\delta$  7.82 (d,  $J = 8.0$  Hz, 1H), 7.43 (d,  $J = 8.0$  Hz, 2H), 7.33-7.28 (m, 2H), 7.24-7.17 (m, 3H), 7.03 (d,  $J = 8.0$  Hz, 1H), 6.91 (dd,  $J = 8.0, 1.6$  Hz, 1H), 6.85-6.79 (m, 2H), 4.24-4.13 (m, 2H), 3.33 (s, 2H);  $^{13}\text{C}$  NMR (100 MHz,  $\text{CDCl}_3$ )  $\delta$  153.2, 143.5, 142.8, 140.3, 135.6, 130.8, 129.3, 129.2, 129.0 (q,  $J_{\text{C-F}} = 32.2$  Hz), 125.3 (q,  $J_{\text{C-F}} = 3.7$  Hz), 124.1 (q,  $J_{\text{C-F}} = 270.5$  Hz), 123.2, 122.8, 120.3, 119.7, 118.9, 116.6, 110.3, 34.2; HRMS (ESI-TOF)  $m/z$ :  $[\text{M} + \text{H}]^+$  calcd for  $\text{C}_{21}\text{H}_{17}\text{F}_3\text{N}_3$  368.1369, found 368.1368.

**2-(2-(3-Bromobenzyl)-1H-benzo[d]imidazol-1-yl)aniline (1i).** 7 h; eluent: EtOAc/PE 25:75; 681 mg, 90% yield; white solid, mp 104-105 °C;  $^1\text{H}$  NMR (400 MHz,  $\text{CDCl}_3$ )  $\delta$  7.82 (d,  $J = 8.0$  Hz, 1H), 7.34-7.26 (m, 3H, overlapped with the peak of chloroform), 7.23-7.19 (m, 1H), 7.09 (s, 1H), 7.05-6.99 (m, 3H), 6.93 (dd,  $J = 7.6, 1.2$  Hz, 1H), 6.85-6.81 (m, 2H), 4.14-4.06 (m, 2H), 3.28 (s, 2H);  $^{13}\text{C}$  NMR (100 MHz,  $\text{CDCl}_3$ )  $\delta$  153.5, 143.6, 142.9, 138.5, 135.8, 132.0, 130.9, 130.0, 129.9, 129.3, 127.7, 123.2, 122.8, 122.4, 120.4, 119.8, 118.9, 116.6, 110.4, 34.2; HRMS (ESI-TOF)  $m/z$ :  $[\text{M} + \text{H}]^+$  calcd for  $\text{C}_{20}\text{H}_{17}\text{BrN}_3$  378.0600, found 378.0597.

**2-(2-(2-Bromobenzyl)-1H-benzo[d]imidazol-1-yl)aniline (1j).** 5 h; eluent: EtOAc/PE 17:83; 620 mg, 82% yield; white solid, mp 168-169 °C;  $^1\text{H}$  NMR (400 MHz,  $\text{DMSO-}d_6$ )  $\delta$  7.63 (d,  $J = 7.2$  Hz, 1H), 7.56 (d,  $J = 7.6$  Hz, 1H), 7.32-7.31 (m, 2H), 7.25-7.16 (m, 4H), 7.02-6.93 (m, 3H), 6.66 (t,  $J = 7.6$  Hz, 1H), 5.05 (s, 2H),

4.18-4.07 (m, 2H);  $^{13}\text{C}$  NMR (100 MHz, DMSO- $d_6$ )  $\delta$  153.3, 145.7, 143.2, 137.0, 136.2, 132.8, 132.0, 130.6, 129.2, 129.1, 128.1, 124.5, 122.8, 122.2, 119.34, 119.27, 116.8, 116.6, 110.6, 34.2; HRMS (ESI-TOF)  $m/z$ :  $[\text{M} + \text{H}]^+$  calcd for  $\text{C}_{20}\text{H}_{17}\text{BrN}_3$  378.0600, found 378.0601.

**2-(2-(2,5-Dimethylbenzyl)-1H-benzo[d]imidazol-1-yl)aniline (1k).** 12 h; eluent: EtOAc/ $\text{CH}_2\text{Cl}_2$ /PE 8:8:84; 635 mg, 97% yield; white solid, mp 139-140 °C;  $^1\text{H}$  NMR (400 MHz,  $\text{CDCl}_3$ )  $\delta$  7.82 (d,  $J = 8.0$  Hz, 1H), 7.30-7.25 (m, 2H), 7.19 (dt,  $J = 7.6, 1.2$  Hz, 1H), 7.00 (d,  $J = 8.0$  Hz, 1H), 6.92-6.89 (m, 2H), 6.87-6.85 (m, 1H), 6.81-6.77 (m, 2H), 6.69 (s, 1H), 4.09 (s, 2H), 3.24 (s, 2H), 2.14 (s, 3H), 2.05 (s, 3H);  $^{13}\text{C}$  NMR (100 MHz,  $\text{CDCl}_3$ )  $\delta$  154.1, 143.8, 142.8, 135.9, 135.2, 134.2, 133.5, 130.5, 130.4, 130.1, 129.3, 127.6, 122.8, 122.4, 120.8, 119.6, 118.8, 116.5, 110.1, 32.0, 20.9, 19.0; HRMS (ESI-TOF)  $m/z$ :  $[\text{M} + \text{H}]^+$  calcd for  $\text{C}_{22}\text{H}_{22}\text{N}_3$  328.1808, found 328.1810.

**2-(2-(3,4-Dimethoxybenzyl)-1H-benzo[d]imidazol-1-yl)aniline (1l).** 4 h; eluent: EtOAc/PE 40:60; 647 mg, 90% yield; white solid, mp 55-56 °C;  $^1\text{H}$  NMR (400 MHz,  $\text{CDCl}_3$ )  $\delta$  7.82 (d,  $J = 8.0$  Hz, 1H), 7.32-7.27 (m, 2H, overlapped with the peak of chloroform), 7.19 (t,  $J = 7.6$  Hz, 1H), 7.01 (d,  $J = 8.0$  Hz, 1H), 6.96-6.94 (m, 1H), 6.84-6.81 (m, 2H), 6.66 (d,  $J = 8.4$  Hz, 1H), 6.59 (dd,  $J = 8.0, 1.6$  Hz, 1H), 6.51 (d,  $J = 1.6$  Hz, 1H), 4.12-4.04 (m, 2H), 3.81 (s, 3H), 3.72 (s, 3H), 3.25 (s, 2H);  $^{13}\text{C}$  NMR (100 MHz,  $\text{CDCl}_3$ )  $\delta$  154.4, 148.5, 147.6, 143.7, 142.8, 135.7, 130.5, 129.4, 128.6, 122.9, 122.5, 121.0, 120.7, 119.5, 118.7, 116.4, 112.0, 111.0, 110.2, 55.8, 55.7, 34.1; HRMS (ESI-TOF)  $m/z$ :  $[\text{M} + \text{H}]^+$  calcd for  $\text{C}_{22}\text{H}_{22}\text{N}_3\text{O}_2$  360.1707, found 360.1709.

**2-(2-(Naphthalen-1-ylmethyl)-1H-benzo[d]imidazol-1-yl)aniline (1m).** 12 h; eluent: EtOAc/ $\text{CH}_2\text{Cl}_2$ /PE 6:47:47; 671 mg, 96% yield; white solid, mp 199-200 °C;  $^1\text{H}$  NMR (400 MHz, DMSO- $d_6$ )  $\delta$  8.07 (d,  $J = 5.6$  Hz, 1H), 7.90 (d,  $J = 5.2$  Hz, 1H), 7.80 (d,  $J = 8.0$  Hz, 1H), 7.59 (d,  $J = 6.4$  Hz, 1H), 7.48 (s, 2H), 7.35 (t,  $J = 7.6$  Hz, 1H),

7.24-6.97 (m, 7H), 6.65 (t,  $J = 6.8$  Hz, 1H), 5.09 (s, 2H), 4.56-4.38 (m, 2H);  $^{13}\text{C}$  NMR (100 MHz,  $\text{DMSO-}d_6$ )  $\delta$  154.1, 145.7, 143.2, 136.3, 133.8, 133.3, 132.1, 130.6, 129.3, 128.8, 127.8, 127.6, 126.5, 126.0, 125.9, 124.7, 122.7, 122.1, 119.6, 119.2, 116.9, 116.7, 110.6, 31.6; HRMS (ESI-TOF)  $m/z$ :  $[\text{M} + \text{H}]^+$  calcd for  $\text{C}_{24}\text{H}_{20}\text{N}_3$  350.1652, found 350.1650.

**2-(2-(Thiophen-2-ylmethyl)-1H-benzo[d]imidazol-1-yl)aniline (1n).** 5 h; eluent: EtOAc/PE 17:83; 446 mg, 73% yield; white solid, mp 134-135 °C;  $^1\text{H}$  NMR (400 MHz,  $\text{CDCl}_3$ )  $\delta$  7.83-7.81 (m, 1H), 7.31-7.26 (m, 2H), 7.20 (dt,  $J = 8.0, 0.8$  Hz, 1H), 7.08-6.98 (m, 3H), 6.85-6.79 (m, 3H), 6.64-6.63 (m, 1H), 4.36-4.25 (m, 2H), 3.39 (s, 2H);  $^{13}\text{C}$  NMR (100 MHz,  $\text{CDCl}_3$ )  $\delta$  153.2, 143.7, 142.8, 138.2, 135.6, 130.7, 129.2, 126.8, 126.2, 124.7, 123.1, 122.7, 120.4, 119.8, 118.8, 116.5, 110.4, 28.6; HRMS (ESI-TOF)  $m/z$ :  $[\text{M} + \text{H}]^+$  calcd for  $\text{C}_{18}\text{H}_{16}\text{N}_3\text{S}$  306.1059, found 306.1061.

**2-(2-Methyl-1H-benzo[d]imidazol-1-yl)aniline (1o).** 5 h; eluent: EtOAc/PE 33:67; 397 mg, 89% yield; yellow oil;  $^1\text{H}$  NMR (400 MHz,  $\text{CDCl}_3$ )  $\delta$  7.71 (d,  $J = 8.0$  Hz, 1H), 7.31-7.27 (m, 1H, overlapped with the peak of chloroform), 7.25-7.21 (m, 1H), 7.18-7.14 (m, 1H), 7.07 (dd,  $J = 7.6, 1.2$  Hz, 1H), 7.01 (d,  $J = 7.6$  Hz, 1H), 6.90-6.83 (m, 2H), 3.66 (s, 2H), 2.40 (s, 3H);  $^{13}\text{C}$  NMR (100 MHz,  $\text{CDCl}_3$ )  $\delta$  152.5, 143.5, 142.8, 135.6, 130.5, 128.9, 122.6, 122.4, 120.7, 119.0, 118.7, 116.5, 110.1, 13.9; HRMS (ESI-TOF)  $m/z$ :  $[\text{M} + \text{H}]^+$  calcd for  $\text{C}_{14}\text{H}_{14}\text{N}_3$  224.1182, found 224.1181.

**2-(2-Ethyl-1H-benzo[d]imidazol-1-yl)aniline (1p).** 8 h; eluent: EtOAc/PE 25:75; 285 mg, 60% yield; white solid, mp 132-133 °C;  $^1\text{H}$  NMR (400 MHz,  $\text{CDCl}_3$ )  $\delta$  7.78 (d,  $J = 8.0$  Hz, 1H), 7.32-7.23 (m, 2H, overlapped with the peak of chloroform), 7.17 (t,  $J = 8.0$  Hz, 1H), 7.09 (dd,  $J = 7.6, 1.2$  Hz, 1H), 7.01 (d,  $J = 8.0$  Hz, 1H), 6.89-6.84 (m, 2H), 3.58 (s, 2H), 2.72 (q,  $J = 7.6$  Hz, 2H), 1.33 (t,  $J = 7.6$  Hz, 3H);  $^{13}\text{C}$  NMR (100 MHz,  $\text{CDCl}_3$ )  $\delta$  157.0, 143.5, 142.9, 135.5, 130.4, 129.0, 122.6, 122.4, 120.7,

119.2, 118.7, 116.4, 110.0, 21.0, 11.8; HRMS (ESI-TOF)  $m/z$ :  $[M + H]^+$  calcd for  $C_{15}H_{16}N_3$  238.1339, found 238.1338.

**2-(2-(Cyclopropylmethyl)-1H-benzo[d]imidazol-1-yl)aniline (1q).** 10 h; eluent: EtOAc/PE 25:75; 500 mg, 95% yield; white solid, mp 112-114 °C;  $^1H$  NMR (400 MHz,  $CDCl_3$ )  $\delta$  7.81 (dt,  $J = 8.0, 0.8$  Hz, 1H), 7.34-7.26 (m, 2H, overlapped with the peak of chloroform), 7.22-7.18 (m, 1H), 7.12 (dd,  $J = 8.0, 1.6$  Hz, 1H), 7.05-7.02 (m, 1H), 6.91-6.86 (m, 2H), 3.54 (s, 2H), 2.71-2.61 (m, 2H), 1.18-1.08 (m, 1H), 0.52-0.47 (m, 2H), 0.15-0.11 (m, 2H);  $^{13}C$  NMR (100 MHz,  $CDCl_3$ )  $\delta$  155.7, 143.5, 142.9, 135.6, 130.5, 129.2, 122.7, 122.4, 120.8, 119.4, 118.8, 116.4, 110.1, 32.6, 9.2, 4.9, 4.8; HRMS (ESI-TOF)  $m/z$ :  $[M + H]^+$  calcd for  $C_{17}H_{18}N_3$  264.1495, found 264.1496.

**2-(2-Benzyl-1H-benzo[d]imidazol-1-yl)-6-methylaniline (1r).** 12 h; eluent: EtOAc/PE 17:83; 613 mg, 98% yield; white solid, mp 166-167 °C;  $^1H$  NMR (400 MHz,  $CDCl_3$ )  $\delta$  7.82 (d,  $J = 8.0$  Hz, 1H), 7.30-7.26 (m, 1H, overlapped with the peak of chloroform), 7.20-7.13 (m, 5H), 7.00-6.99 (m, 3H), 6.84 (d,  $J = 7.6$  Hz, 1H), 6.75 (t,  $J = 8.0$  Hz, 1H), 4.15-4.06 (m, 2H), 3.04 (s, 2H), 2.16 (s, 3H);  $^{13}C$  NMR (100 MHz,  $CDCl_3$ )  $\delta$  154.3, 142.9, 142.1, 136.2, 135.8, 131.4, 129.0, 128.3, 126.9, 126.6, 123.9, 122.9, 122.5, 120.4, 119.6, 118.1, 110.3, 34.5, 17.6; HRMS (ESI-TOF)  $m/z$ :  $[M + H]^+$  calcd for  $C_{21}H_{20}N_3$  314.1652, found 314.1651.

**2-(2-Benzyl-1H-benzo[d]imidazol-1-yl)-5-methylaniline (1s).** 3 h; eluent: EtOAc/PE 25:75; 464 mg, 74% yield; white solid, mp 131-132 °C;  $^1H$  NMR (400 MHz,  $CDCl_3$ )  $\delta$  7.81 (d,  $J = 8.0$  Hz, 1H), 7.29-7.24 (m, 1H, overlapped with the peak of chloroform), 7.20-7.13 (m, 4H), 7.07-7.05 (m, 2H), 7.00 (d,  $J = 8.0$  Hz, 1H), 6.80 (d,  $J = 8.4$  Hz, 1H), 6.62-6.60 (m, 2H), 4.15-4.06 (m, 2H), 3.17 (s, 2H), 2.35 (s, 3H);  $^{13}C$  NMR (100 MHz,  $CDCl_3$ )  $\delta$  154.4, 143.3, 142.9, 140.7, 136.4, 135.9, 129.0, 128.9, 128.4, 126.6, 122.8, 122.5, 119.8, 119.5, 118.2, 117.0, 110.3, 34.3, 21.5; HRMS

(ESI-TOF)  $m/z$ :  $[M + H]^+$  calcd for  $C_{21}H_{20}N_3$  314.1652, found 314.1653.

**2-(2-Benzyl-1H-benzo[d]imidazol-1-yl)-4-methylaniline (1t).** 5 h; eluent: EtOAc/PE 25:75; 527 mg, 84% yield; white solid, mp 137-138 °C;  $^1H$  NMR (400 MHz,  $CDCl_3$ )  $\delta$  7.81 (d,  $J = 8.0$  Hz, 1H), 7.28-7.24 (m, 1H, overlapped with the peak of chloroform), 7.19-6.99 (m, 8H), 6.71 (d,  $J = 8.4$  Hz, 1H), 6.64 (s, 1H), 4.17-4.04 (m, 2H), 3.13 (s, 2H), 2.19 (s, 3H);  $^{13}C$  NMR (100 MHz,  $CDCl_3$ )  $\delta$  154.2, 142.8, 141.1, 136.4, 135.8, 131.2, 129.6, 129.0, 128.3, 128.2, 126.6, 122.9, 122.5, 120.6, 119.5, 116.6, 110.3, 34.5, 20.2; HRMS (ESI-TOF)  $m/z$ :  $[M + H]^+$  calcd for  $C_{21}H_{20}N_3$  314.1652, found 314.1653.

**2-(2-Benzyl-1H-benzo[d]imidazol-1-yl)-3-methylaniline (1u).** 4.5 h; eluent: EtOAc/PE 25:75; 338 mg, 54% yield; white solid, mp 159-160 °C;  $^1H$  NMR (400 MHz,  $CDCl_3$ )  $\delta$  7.82 (d,  $J = 8.0$  Hz, 1H), 7.30-7.26 (m, 1H, overlapped with the peak of chloroform), 7.20-7.12 (m, 5H), 7.01-6.98 (m, 3H), 6.84 (d,  $J = 7.2$  Hz, 1H), 6.75 (t,  $J = 7.6$  Hz, 1H), 4.15-4.06 (m, 2H), 3.04 (s, 2H), 2.16 (s, 3H);  $^{13}C$  NMR (100 MHz,  $CDCl_3$ )  $\delta$  154.3, 142.8, 142.1, 136.2, 135.8, 131.4, 129.0, 128.3, 126.9, 126.6, 123.9, 122.9, 122.5, 120.4, 119.6, 118.1, 110.3, 34.5, 17.6; HRMS (ESI-TOF)  $m/z$ :  $[M + H]^+$  calcd for  $C_{21}H_{20}N_3$  314.1652, found 314.1653.

**2-(2-Benzyl-1H-benzo[d]imidazol-1-yl)-5-(trifluoromethyl)aniline (1v).** 3 h; eluent: EtOAc/PE 25:75; 691 mg, 94% yield; white solid, mp 166-167 °C;  $^1H$  NMR (400 MHz,  $CDCl_3$ )  $\delta$  7.81 (d,  $J = 8.0$  Hz, 1H), 7.30 (dt,  $J = 8.0, 1.2$  Hz, 1H), 7.23-7.19 (m, 1H), 7.15-7.12 (m, 3H), 7.04-6.97 (m, 6H), 4.14-4.06 (m, 2H), 3.58 (s, 2H);  $^{13}C$  NMR (100 MHz,  $CDCl_3$ )  $\delta$  153.7, 144.1, 142.8, 135.9, 135.3, 132.7 (q,  $J_{C-F} = 32.3$  Hz), 130.0, 128.8, 128.5, 126.9, 123.7 (q,  $J_{C-F} = 270.9$  Hz), 123.3, 123.2 (q,  $J_{C-F} = 1.3$  Hz), 122.9, 119.8, 115.0 (q,  $J_{C-F} = 3.8$  Hz), 113.0 (q,  $J_{C-F} = 3.8$  Hz), 110.0, 34.5; HRMS (ESI-TOF)  $m/z$ :  $[M + H]^+$  calcd for  $C_{21}H_{17}F_3N_3$  368.1369, found 368.1372.

**2-(2-Benzyl-1H-benzo[d]imidazol-1-yl)-5-chloroaniline (1w).** 4.5 h; eluent: EtOAc/CH<sub>2</sub>Cl<sub>2</sub>/PE 17:17:66; 514 mg, 77% yield; white solid, mp 171-172 °C; <sup>1</sup>H NMR (400 MHz, CDCl<sub>3</sub>) δ 7.80 (d, *J* = 8.0 Hz, 1H), 7.30-7.25 (m, 1H, overlapped with the peak of chloroform), 7.21-7.14 (m, 4H), 7.05-6.97 (m, 3H), 6.82-6.73 (m, 3H), 4.13-4.05 (m, 2H), 3.39 (s, 2H); <sup>13</sup>C NMR (100 MHz, CDCl<sub>3</sub>) δ 154.0, 144.7, 142.8, 136.10, 136.09, 135.6, 130.4, 128.8, 128.5, 126.8, 123.1, 122.8, 119.7, 119.0, 118.6, 116.0, 110.1, 34.4; HRMS (ESI-TOF) *m/z*: [M + H]<sup>+</sup> calcd for C<sub>20</sub>H<sub>17</sub>ClN<sub>3</sub> 334.1106, found 334.1109.

**2-(2-Benzyl-1H-benzo[d]imidazol-1-yl)-4-chloroaniline (1x).** 6.5 h; eluent: EtOAc/PE 25:75; 361 mg, 54% yield; white solid, mp 142-143 °C; <sup>1</sup>H NMR (400 MHz, CDCl<sub>3</sub>) δ 7.80 (d, *J* = 8.0 Hz, 1H), 7.29-7.14 (m, 6H, overlapped with the peak of chloroform), 7.03-6.97 (m, 3H), 6.84 (d, *J* = 2.4 Hz, 1H), 6.72 (d, *J* = 8.8 Hz, 1H), 4.16-4.05 (m, 2H), 3.32 (s, 2H); <sup>13</sup>C NMR (100 MHz, CDCl<sub>3</sub>) δ 153.9, 142.8, 142.5, 136.0, 135.5, 130.6, 129.2, 128.9, 128.5, 126.8, 123.2, 122.8, 122.6, 121.2, 119.7, 117.3, 110.1, 34.5; HRMS (ESI-TOF) *m/z*: [M + H]<sup>+</sup> calcd for C<sub>20</sub>H<sub>17</sub>ClN<sub>3</sub> 334.1106, found 334.1107.

**2-(2-Benzyl-1H-benzo[d]imidazol-1-yl)-4-chloro-5-methylaniline (1y).** 6 h; eluent: EtOAc/PE 17:83; 487 mg, 70% yield; white solid, mp 162-163 °C; <sup>1</sup>H NMR (400 MHz, CDCl<sub>3</sub>) δ 7.83 (d, *J* = 8.0 Hz, 1H), 7.31 (dt, *J* = 8.0, 1.2 Hz, 1H), 7.24-7.17 (m, 4H), 7.10-7.07 (m, 2H), 7.02 (d, *J* = 8.0 Hz, 1H), 6.88 (s, 1H), 6.70 (s, 1H), 4.19-4.08 (m, 2H), 3.26 (s, 2H), 2.40 (s, 3H); <sup>13</sup>C NMR (100 MHz, CDCl<sub>3</sub>) δ 154.1, 142.8, 142.3, 138.6, 136.1, 135.6, 129.3, 128.9, 128.5, 126.8, 123.1, 123.0, 122.7, 119.7, 119.1, 118.2, 110.1, 34.4, 20.1; HRMS (ESI-TOF) *m/z*: [M + H]<sup>+</sup> calcd for C<sub>21</sub>H<sub>19</sub>ClN<sub>3</sub> 348.1262, found 348.1264.

**2-(2-Benzyl-5,6-dimethyl-1H-benzo[d]imidazol-1-yl)aniline (1z).** 12 h; eluent:



EtOAc/PE 80:20; 622 mg, 95% yield; white solid, mp 152-153 °C; <sup>1</sup>H NMR (400 MHz, CDCl<sub>3</sub>) δ 7.58 (s, 1H), 7.29-7.25 (m, 1H, overlapped with the peak of chloroform), 7.15-7.12 (m, 3H), 7.01-7.00 (m, 2H), 6.89 (dd, *J* = 8.0 Hz, 1.6 Hz, 1H), 6.80-6.77 (m, 3H), 4.13-4.04 (m, 2H), 3.22 (s, 2H), 2.37 (s, 3H), 2.28 (s, 3H); <sup>13</sup>C NMR (100 MHz, CDCl<sub>3</sub>) δ 153.2, 143.7, 141.3, 136.5, 134.2, 132.0, 131.3, 130.4, 129.3, 128.8, 128.3, 126.5, 120.9, 119.6, 118.6, 116.4, 110.4, 34.3, 20.3, 20.2; HRMS (ESI-TOF) *m/z*: [M + H]<sup>+</sup> calcd for C<sub>22</sub>H<sub>22</sub>N<sub>3</sub> 328.1808, found 328.1809.

**4. General Procedure for the Synthesis of Products 2.** A solution of the substrate **1** (0.5 mmol) in toluene (10 mL) was treated sequentially with I<sub>2</sub> (279 mg, 1.1 mmol) and NaOAc (206 mg, 2.5 mmol), and then heated at reflux until TLC indicated the disappearance of the substrate. After cooling to room temperature, the reaction was quenched with sat. Na<sub>2</sub>SO<sub>3</sub> (5 mL) followed by the addition of conc. ammonia solution (2 mL), and extracted with CH<sub>2</sub>Cl<sub>2</sub> (3 × 20 mL). The combined organic layer was dried over anhydrous Na<sub>2</sub>SO<sub>4</sub>, concentrated and purified through silica gel chromatography to yield the product **2**.

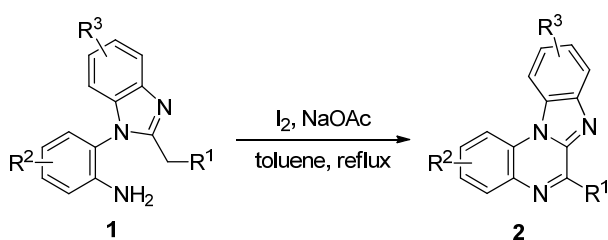

**6-Phenylbenzo[4,5]imidazo[1,2-*a*]quinoxaline (2a).**<sup>3</sup> eluent: EtOAc/PE 5:95; 145 mg, 98% yield (0.5 mmol, 1.5 h); 1.44 g, 97% (5 mmol, 2 h); yellow solid, mp 202-204 °C; <sup>1</sup>H NMR (400 MHz, CDCl<sub>3</sub>) δ 8.73-8.71 (m, 2H), 8.45 (dd, *J* = 8.4, 0.8 Hz, 1H), 8.40-8.37 (m, 1H), 8.20 (dd, *J* = 8.0, 1.2 Hz, 1H), 8.17-8.15 (m, 1H), 7.71-7.67 (m, 1H), 7.64-7.54 (m, 6H); <sup>13</sup>C NMR (100 MHz, CDCl<sub>3</sub>) δ 151.9, 144.2,

140.7, 136.3, 135.6, 131.1, 130.7, 130.2, 130.0, 129.3, 129.1, 128.4, 125.5, 125.3, 124.6, 122.3, 114.4, 114.2; HRMS (ESI-TOF)  $m/z$ :  $[M + H]^+$  calcd for  $C_{20}H_{14}N_3$  296.1182, found 296.1180.

**6-(*p*-Tolyl)benzo[4,5]imidazo[1,2-*a*]quinoxaline (2b).** 1 h; eluent: EtOAc/PE 5:95; 145 mg, 94% yield; yellow solid, mp 171-173 °C;  $^1H$  NMR (400 MHz,  $CDCl_3$ )  $\delta$  8.62 (d,  $J = 8.0$  Hz, 2H), 8.40-8.30 (m, 2H), 8.15-8.11 (m, 2H), 7.63-7.59 (m, 1H), 7.56-7.48 (m, 3H), 7.40 (d,  $J = 8.0$  Hz, 2H), 2.47 (s, 3H);  $^{13}C$  NMR (100 MHz,  $CDCl_3$ )  $\delta$  152.0, 144.2, 141.0, 140.8, 135.7, 133.5, 131.0, 130.2, 129.9, 129.3, 129.2, 128.9, 125.5, 125.3, 124.6, 122.3, 114.4, 114.2, 21.7; HRMS (ESI-TOF)  $m/z$ :  $[M + H]^+$  calcd for  $C_{21}H_{16}N_3$  310.1339, found 310.1340.

**6-(4-Methoxyphenyl)benzo[4,5]imidazo[1,2-*a*]quinoxaline (2c).** 1 h; eluent: EtOAc/ $CH_2Cl_2$ /PE 5:5:90; 157 mg, 96% yield; yellow solid, mp 201-203 °C;  $^1H$  NMR (400 MHz,  $C_5D_5N$ )  $\delta$  9.33 (d,  $J = 8.8$  Hz, 2H), 8.58-8.56 (m, 2H), 8.33-8.31 (m, 2H), 7.71-7.56 (m, 4H), 7.23 (d,  $J = 8.8$  Hz, 2H), 3.74 (s, 3H);  $^{13}C$  NMR (100 MHz,  $C_5D_5N$ )  $\delta$  162.1, 150.2, 144.3, 140.7, 135.7, 132.4, 130.6, 130.2, 129.2, 129.1, 128.9, 125.6, 125.5, 124.6, 121.9, 115.02, 114.98, 113.8, 55.1; HRMS (ESI-TOF)  $m/z$ :  $[M + H]^+$  calcd for  $C_{21}H_{16}N_3O$  326.1288, found 326.1291.

**6-(4-Fluorophenyl)benzo[4,5]imidazo[1,2-*a*]quinoxaline (2d).** 1.5 h; eluent: EtOAc/ $CH_2Cl_2$ /PE 3:3:94; 146 mg, 93% yield; yellow solid, mp 209-210 °C;  $^1H$  NMR (400 MHz,  $C_5D_5N$ )  $\delta$  9.29-9.24 (m, 2H), 8.58-8.55 (m, 2H), 8.33-8.30 (m, 2H), 7.75-7.60 (m, 4H), 7.44-7.38 (m, 2H);  $^{13}C$  NMR (100 MHz,  $C_5D_5N$ )  $\delta$  164.5 (d,  $J_{C-F} = 248.6$  Hz), 144.2, 140.4, 135.3, 132.93, 132.87, 132.8, 130.8, 130.1, 129.4, 129.2, 125.6 (d,  $J_{C-F} = 6.7$  Hz), 124.8, 121.9, 115.1 (d,  $J_{C-F} = 29.5$  Hz), 115.0; HRMS (ESI-TOF)  $m/z$ :  $[M + H]^+$  calcd for  $C_{20}H_{13}FN_3$  314.1088, found 314.1089.

**6-(4-Chlorophenyl)benzo[4,5]imidazo[1,2-*a*]quinoxaline (2e).** 1 h; eluent:

EtOAc/PE 2:98; 157 mg, 95% yield; yellow solid, mp 208-209 °C; <sup>1</sup>H NMR (400 MHz, C<sub>5</sub>D<sub>5</sub>N) δ 9.20 (d, *J* = 8.4 Hz, 2H), 8.60 (d, *J* = 7.6 Hz, 2H), 8.33 (d, *J* = 8.0 Hz, 2H), 7.78-7.60 (m, 6H); <sup>13</sup>C NMR (100 MHz, C<sub>5</sub>D<sub>5</sub>N) δ 144.2, 140.4, 136.6, 135.1, 132.1, 130.9, 130.1, 129.7, 129.3, 128.4, 125.7, 125.6, 124.8, 121.9, 115.1, 115.0; HRMS (ESI-TOF) *m/z*: [M + H]<sup>+</sup> calcd for C<sub>20</sub>H<sub>13</sub>ClN<sub>3</sub> 330.0793, found 330.0791.

**6-(4-Bromophenyl)benzo[4,5]imidazo[1,2-*a*]quinoxaline (2f).**<sup>4</sup> 1 h; eluent: EtOAc/PE 2:98; 178 mg, 95% yield; yellow solid, mp 233-234 °C; <sup>1</sup>H NMR (400 MHz, C<sub>5</sub>D<sub>5</sub>N) δ 9.12 (d, *J* = 8.4 Hz, 2H), 8.60-8.58 (m, 2H), 8.32 (d, *J* = 8.0 Hz, 2H), 7.84 (d, *J* = 8.8 Hz, 2H), 7.76 (t, *J* = 8.0 Hz, 1H), 7.70-7.59 (m, 3H); <sup>13</sup>C NMR (100 MHz, C<sub>5</sub>D<sub>5</sub>N) δ 149.4, 144.2, 140.3, 135.5, 132.3, 131.4, 130.9, 130.1, 129.7, 129.3, 125.7, 125.6, 125.4, 124.9, 121.9, 115.1, 115.0; HRMS (ESI-TOF) *m/z*: [M + H]<sup>+</sup> calcd for C<sub>20</sub>H<sub>13</sub>BrN<sub>3</sub> 374.0287, found 374.0289.

**6-(4-Iodophenyl)benzo[4,5]imidazo[1,2-*a*]quinoxaline (2g).** 2 h; eluent: EtOAc/CH<sub>2</sub>Cl<sub>2</sub>/PE 3:3:94; 202 mg, 96% yield; yellow solid, mp 238-239 °C; <sup>1</sup>H NMR (400 MHz, C<sub>5</sub>D<sub>5</sub>N) δ 8.95-8.93 (m, 2H), 8.60-8.57 (m, 2H), 8.31-8.29 (m, 2H), 8.06-8.03 (m, 2H), 7.76-7.71 (m, 1H), 7.68-7.57 (m, 3H); <sup>13</sup>C NMR (100 MHz, C<sub>5</sub>D<sub>5</sub>N) δ 149.7, 144.2, 140.3, 137.5, 136.0, 135.4, 132.2, 130.9, 130.1, 129.7, 129.3, 125.7, 125.6, 124.8, 121.9, 115.1, 115.0, 98.7; HRMS (ESI-TOF) *m/z*: [M + H]<sup>+</sup> calcd for C<sub>20</sub>H<sub>13</sub>IN<sub>3</sub> 422.0149, found 422.0150.

**6-(4-(Trifluoromethyl)phenyl)benzo[4,5]imidazo[1,2-*a*]quinoxaline (2h).** 5 h; eluent: EtOAc/CH<sub>2</sub>Cl<sub>2</sub>/PE 3:3:94; 171 mg, 94% yield; yellow solid, mp 189-190 °C; <sup>1</sup>H NMR (400 MHz, C<sub>5</sub>D<sub>5</sub>N) δ 9.26 (d, *J* = 8.0 Hz, 2H), 8.58 (d, *J* = 7.6 Hz, 2H), 8.31 (d, *J* = 8.0 Hz, 2H), 7.94 (d, *J* = 8.4 Hz, 2H), 7.77 (t, *J* = 7.6 Hz, 1H), 7.70-7.64 (m, 2H), 7.63-7.61 (m, 1H, overlapped with the peak of pyridine); <sup>13</sup>C NMR (100 MHz, C<sub>5</sub>D<sub>5</sub>N) δ 149.1, 144.2, 140.3, 140.0, 135.2, 131.4 (q, *J*<sub>C-F</sub> = 31.9 Hz), 131.1, 131.0,

130.1, 130.0, 129.4, 125.7, 125.0 (q,  $J_{C-F} = 3.8$  Hz), 124.9, 124.7 (q,  $J_{C-F} = 270.7$  Hz), 121.9, 115.1, 115.0; HRMS (ESI-TOF)  $m/z$ :  $[M + H]^+$  calcd for  $C_{21}H_{13}F_3N_3$  364.1056, found 364.1053.

**6-(3-Bromophenyl)benzo[4,5]imidazo[1,2-*a*]quinoxaline (2i).** 5 h; eluent: EtOAc/CH<sub>2</sub>Cl<sub>2</sub>/PE 3:3:94; 176 mg, 94% yield; yellow solid, mp 149-150 °C; <sup>1</sup>H NMR (400 MHz, C<sub>5</sub>D<sub>5</sub>N)  $\delta$  9.44 (d,  $J = 1.6$  Hz, 1H), 9.22 (dd,  $J = 8.0, 0.8$  Hz, 1H), 8.60-8.56 (m, 2H), 8.33-8.28 (m, 2H), 7.79-7.72 (m, 2H), 7.67-7.60 (m, 3H, overlapped with the peak of pyridine), 7.50 (t,  $J = 8.0$  Hz, 1H); <sup>13</sup>C NMR (100 MHz, C<sub>5</sub>D<sub>5</sub>N)  $\delta$  149.2, 144.6, 140.7, 139.0, 135.6, 133.9, 133.4, 131.4, 130.5, 130.2, 129.8, 129.7, 126.13, 126.06, 125.3, 122.8, 122.4, 115.5, 115.4; HRMS (ESI-TOF)  $m/z$ :  $[M + H]^+$  calcd for  $C_{20}H_{13}BrN_3$  374.0287, found 374.0284.

**6-(2-Bromophenyl)benzo[4,5]imidazo[1,2-*a*]quinoxaline (2j).** 1.5 h; eluent: EtOAc/CH<sub>2</sub>Cl<sub>2</sub>/PE 6:12:82; 178 mg, 95% yield; yellow solid, mp 210-211 °C; <sup>1</sup>H NMR (400 MHz, C<sub>5</sub>D<sub>5</sub>N)  $\delta$  8.60 (t,  $J = 7.2$  Hz, 2H), 8.33 (dd,  $J = 8.0, 1.2$  Hz, 1H), 8.21-8.19 (m, 1H), 8.08 (dd,  $J = 8.0, 1.2$  Hz, 1H), 7.83 (d,  $J = 8.0$  Hz, 1H), 7.79-7.75 (m, 1H), 7.65-7.57 (m, 3H), 7.52 (dt,  $J = 7.6, 0.8$  Hz, 1H), 7.36 (dt,  $J = 8.0, 1.6$  Hz, 1H); <sup>13</sup>C NMR (100 MHz, C<sub>5</sub>D<sub>5</sub>N)  $\delta$  154.1, 144.7, 140.8, 138.3, 135.5, 133.2, 131.9, 131.1, 131.0, 130.6, 130.1, 129.7, 127.5, 125.7, 125.6, 124.8, 122.9, 122.0, 115.4, 115.1; HRMS (ESI-TOF)  $m/z$ :  $[M + H]^+$  calcd for  $C_{20}H_{13}BrN_3$  374.0287, found 374.0289.

**6-(2,5-Dimethylphenyl)benzo[4,5]imidazo[1,2-*a*]quinoxaline (2k).** 2 h; eluent: EtOAc/CH<sub>2</sub>Cl<sub>2</sub>/PE 4:4:92; 156 mg, 96% yield; white solid, mp 183-184 °C; <sup>1</sup>H NMR (400 MHz, CDCl<sub>3</sub>)  $\delta$  8.56 (d,  $J = 8.4$  Hz, 1H), 8.47-8.44 (m, 1H), 8.24 (dd,  $J = 8.4, 1.6$  Hz, 1H), 8.17-8.14 (m, 1H), 7.79-7.75 (m, 1H), 7.64-7.58 (m, 3H), 7.50 (s, 1H), 7.30-7.24 (m, 2H, overlapped with the peak of chloroform), 2.41 (s, 3H), 2.33 (s, 3H);

$^{13}\text{C}$  NMR (100 MHz,  $\text{CDCl}_3$ )  $\delta$  155.9, 144.5, 141.1, 135.9, 135.6, 135.4, 133.8, 131.1, 130.9, 130.7, 130.4, 130.0, 129.5, 129.4, 125.7, 125.4, 124.8, 122.6, 114.6, 114.3, 21.1, 19.8; HRMS (ESI-TOF)  $m/z$ :  $[\text{M} + \text{H}]^+$  calcd for  $\text{C}_{22}\text{H}_{18}\text{N}_3$  324.1495, found 324.1496.

**6-(3,4-Dimethoxyphenyl)benzo[4,5]imidazo[1,2-*a*]quinoxaline (2l).** 2 h; eluent: EtOAc/ $\text{CH}_2\text{Cl}_2$ /PE 3:3:94; 171 mg, 96% yield; yellow solid, mp 163-164 °C;  $^1\text{H}$  NMR (400 MHz,  $\text{C}_5\text{D}_5\text{N}$ )  $\delta$  9.21 (dd,  $J = 8.8, 2.0$  Hz, 1H), 8.93 (d,  $J = 1.6$  Hz, 1H), 8.61 (d,  $J = 7.6$  Hz, 2H), 8.35 (d,  $J = 8.4$  Hz, 2H), 7.73-7.63 (m, 3H), 7.59 (t,  $J = 7.6$  Hz, 1H), 7.18-7.17 (m, 1H, overlapped with the peak of pyridine), 3.97 (s, 3H), 3.82 (s, 3H);  $^{13}\text{C}$  NMR (100 MHz,  $\text{C}_5\text{D}_5\text{N}$ )  $\delta$  152.3, 150.1, 149.3, 144.3, 140.8, 135.6, 130.6, 130.2, 129.4, 129.2, 128.9, 125.6, 125.5, 125.0, 124.7, 122.0, 115.1, 115.0, 113.8, 111.2, 55.8, 55.6; HRMS (ESI-TOF)  $m/z$ :  $[\text{M} + \text{H}]^+$  calcd for  $\text{C}_{22}\text{H}_{18}\text{N}_3\text{O}_2$  356.1394, found 356.1395.

**6-(Naphthalen-1-yl)benzo[4,5]imidazo[1,2-*a*]quinoxaline (2m).** 2.5 h; eluent: EtOAc/ $\text{CH}_2\text{Cl}_2$ /PE 8:8:84; 167 mg, 97% yield; yellow solid, mp 210-211 °C;  $^1\text{H}$  NMR (400 MHz,  $\text{C}_5\text{D}_5\text{N}$ )  $\delta$  8.70-8.65 (m, 2H, overlapped with the peak of pyridine), 8.47-8.41 (m, 2H), 8.34 (dd,  $J = 8.0, 1.6$  Hz, 1H), 8.16 (d,  $J = 8.0$  Hz, 1H), 8.07 (d,  $J = 8.4$  Hz, 1H), 8.01-7.98 (m, 1H), 7.83-7.79 (m, 1H), 7.71-7.58 (m, 4H), 7.52-7.48 (m, 2H);  $^{13}\text{C}$  NMR (100 MHz,  $\text{C}_5\text{D}_5\text{N}$ )  $\delta$  154.2, 144.6, 141.8, 135.7, 134.4, 134.2, 132.2, 131.0, 130.7, 130.1, 129.8, 129.6, 129.3, 128.6, 126.7, 126.4, 126.2, 125.7, 125.5, 125.3, 124.8, 122.0, 115.4, 115.1; HRMS (ESI-TOF)  $m/z$ :  $[\text{M} + \text{H}]^+$  calcd for  $\text{C}_{24}\text{H}_{16}\text{N}_3$  346.1339, found 346.1337.

**6-(Thiophen-2-yl)benzo[4,5]imidazo[1,2-*a*]quinoxaline (2n).** 7 h; eluent: EtOAc/ $\text{CH}_2\text{Cl}_2$ /PE 3:3:94; 138 mg, 91% yield; yellow solid, mp 195-196 °C;  $^1\text{H}$  NMR (400 MHz,  $\text{C}_5\text{D}_5\text{N}$ )  $\delta$  9.47 (dd,  $J = 3.6, 0.8$  Hz, 1H), 8.53 (t,  $J = 7.6$  Hz, 2H),

8.35-8.33 (m, 1H), 8.22 (dd,  $J = 8.0, 1.2$  Hz, 1H), 7.82 (dd,  $J = 5.2, 0.8$  Hz, 1H), 7.67-7.60 (m, 3H), 7.54-7.51 (m, 1H, overlapped with the peak of pyridine), 7.35-7.33 (m, 1H);  $^{13}\text{C}$  NMR (100 MHz,  $\text{C}_5\text{D}_5\text{N}$ )  $\delta$  145.9, 144.3, 141.4, 139.3, 135.4, 133.9, 131.5, 130.3, 130.2, 129.00, 128.98, 128.7, 125.7, 125.6, 124.8, 121.9, 115.1, 115.0; HRMS (ESI-TOF)  $m/z$ :  $[\text{M} + \text{H}]^+$  calcd for  $\text{C}_{18}\text{H}_{12}\text{N}_3\text{S}$  302.0746, found 302.0749.

**Benzo[4,5]imidazo[1,2-*a*]quinoxaline (2o).**<sup>3</sup> 8 h; eluent: EtOAc/PE 17:83; 103 mg, 94% yield; yellow solid, mp 153-154 °C;  $^1\text{H}$  NMR (400 MHz,  $\text{CDCl}_3$ )  $\delta$  9.12 (s, 1H), 8.20 (d,  $J = 8.4$  Hz, 1H), 8.15 (d,  $J = 8.4$  Hz, 1H), 8.03 (d,  $J = 8.0$  Hz, 1H), 7.99 (d,  $J = 7.2$  Hz, 1H), 7.62 (t,  $J = 8.4$  Hz, 1H), 7.52-7.45 (m, 3H);  $^{13}\text{C}$  NMR (100 MHz,  $\text{CDCl}_3$ )  $\delta$  146.1, 144.3, 141.1, 135.6, 131.1, 129.9, 129.8, 129.6, 125.6, 124.8, 122.0, 114.8, 114.2; HRMS (ESI-TOF)  $m/z$ :  $[\text{M} + \text{H}]^+$  calcd for  $\text{C}_{14}\text{H}_{10}\text{N}_3$  220.0869, found 220.0868.

**6-Methylbenzo[4,5]imidazo[1,2-*a*]quinoxaline (2p).**<sup>3</sup> 10 h; eluent: EtOAc/PE 18:82; 52 mg, 44% yield; yellow solid, mp 150-151 °C;  $^1\text{H}$  NMR (400 MHz,  $\text{CDCl}_3$ )  $\delta$  8.45 (d,  $J = 8.0$  Hz, 1H), 8.40-8.38 (m, 1H), 8.15-8.13 (m, 1H), 8.10 (dd,  $J = 8.0, 1.2$  Hz, 1H), 7.73-7.69 (m, 1H), 7.64-7.56 (m, 3H), 3.07 (s, 3H);  $^{13}\text{C}$  NMR (100 MHz,  $\text{CDCl}_3$ )  $\delta$  154.6, 143.9, 141.4, 135.3, 130.5, 130.2, 129.4, 128.7, 125.6, 125.5, 124.7, 122.0, 114.6, 114.3, 21.8; HRMS (ESI-TOF)  $m/z$ :  $[\text{M} + \text{H}]^+$  calcd for  $\text{C}_{15}\text{H}_{12}\text{N}_3$  234.1026, found 234.1022.

**6-Cyclopropylbenzo[4,5]imidazo[1,2-*a*]quinoxaline (2q).** 8 h; eluent: EtOAc/PE 5:95; 31 mg, 24% yield; yellow solid, mp 149-150 °C;  $^1\text{H}$  NMR (400 MHz,  $\text{CDCl}_3$ )  $\delta$  8.45-8.39 (m, 2H), 8.17-8.15 (m, 1H), 8.01 (dd,  $J = 8.0, 1.6$  Hz, 1H), 7.67-7.57 (m, 3H), 7.55-7.51 (m, 1H), 3.28-3.22 (m, 1H), 1.52-1.48 (m, 2H), 1.30-1.25 (m, 2H);  $^{13}\text{C}$  NMR (100 MHz,  $\text{CDCl}_3$ )  $\delta$  158.6, 144.1, 141.7, 135.7, 130.6, 130.0, 128.9, 127.9, 125.4, 125.3, 124.5, 121.9, 114.5, 114.3, 13.5, 11.1; HRMS (ESI-TOF)  $m/z$ :  $[\text{M} + \text{H}]^+$

calcd for C<sub>17</sub>H<sub>14</sub>N<sub>3</sub> 260.1182, found 260.1184.

**4-Methyl-6-phenylbenzo[4,5]imidazo[1,2-*a*]quinoxaline (2r).** 1.5 h; eluent: EtOAc/CH<sub>2</sub>Cl<sub>2</sub>/PE 3:3:94; 153 mg, 99% yield; yellow solid, mp 170-171 °C; <sup>1</sup>H NMR (400 MHz, CDCl<sub>3</sub>) δ 8.84-8.82 (m, 2H), 8.31 (d, *J* = 8.4 Hz, 1H), 8.21 (d, *J* = 8.4 Hz, 1H), 8.13 (d, *J* = 8.0 Hz, 1H), 7.62-7.46 (m, 6H), 7.34 (d, *J* = 7.2 Hz, 1H), 2.84 (s, 3H); <sup>13</sup>C NMR (100 MHz, CDCl<sub>3</sub>) δ 149.5, 144.2, 140.6, 139.7, 136.7, 133.9, 130.5, 130.2, 130.1, 129.2, 128.6, 128.4, 126.6, 125.2, 124.3, 122.1, 114.4, 112.1, 18.5; HRMS (ESI-TOF) *m/z*: [M + H]<sup>+</sup> calcd for C<sub>21</sub>H<sub>16</sub>N<sub>3</sub> 310.1339, found 310.1338.

**3-Methyl-6-phenylbenzo[4,5]imidazo[1,2-*a*]quinoxaline (2s).** 2 h; eluent: EtOAc/CH<sub>2</sub>Cl<sub>2</sub>/PE 5:5:90; 152 mg, 98% yield; yellow solid, mp 195-196 °C; <sup>1</sup>H NMR (400 MHz, CDCl<sub>3</sub>) δ 8.71-8.69 (m, 2H), 8.38-8.31 (m, 2H), 8.18-8.13 (m, 1H), 7.99 (d, *J* = 1.2 Hz, 1H), 7.64-7.54 (m, 5H), 7.48 (dd, *J* = 8.4, 1.6 Hz, 1H), 2.53 (s, 3H); <sup>13</sup>C NMR (100 MHz, CDCl<sub>3</sub>) δ 151.9, 144.2, 140.7, 136.4, 135.58, 135.57, 130.9, 130.6, 130.3, 130.1, 129.9, 128.5, 127.1, 125.3, 124.5, 122.2, 114.2, 114.1, 21.1; HRMS (ESI-TOF) *m/z*: [M + H]<sup>+</sup> calcd for C<sub>21</sub>H<sub>16</sub>N<sub>3</sub> 310.1339, found 310.1340.

**2-Methyl-6-phenylbenzo[4,5]imidazo[1,2-*a*]quinoxaline (2t).** 1.5 h; eluent: EtOAc/PE 17:83; 152 mg, 98% yield; yellow solid, mp 191-192 °C; <sup>1</sup>H NMR (400 MHz, CDCl<sub>3</sub>) δ 8.70-8.68 (m, 2H), 8.31 (d, *J* = 7.6 Hz, 1H), 8.14-8.10 (m, 2H), 8.00 (d, *J* = 8.0 Hz, 1H), 7.63-7.50 (m, 5H), 7.30 (d, *J* = 8.4 Hz, 1H), 2.57 (s, 3H); <sup>13</sup>C NMR (100 MHz, CDCl<sub>3</sub>) δ 150.7, 144.2, 140.8, 139.9, 136.4, 133.6, 130.6, 130.5, 130.0, 129.9, 129.1, 128.5, 126.8, 125.2, 124.4, 122.1, 114.4, 114.3, 22.3; HRMS (ESI-TOF) *m/z*: [M + H]<sup>+</sup> calcd for C<sub>21</sub>H<sub>16</sub>N<sub>3</sub> 310.1339, found 310.1342.

**1-Methyl-6-phenylbenzo[4,5]imidazo[1,2-*a*]quinoxaline (2u).** 1.5 h; eluent: EtOAc/CH<sub>2</sub>Cl<sub>2</sub>/PE 3:3:94; 152 mg, 98% yield; yellow solid, mp 171-172 °C; <sup>1</sup>H NMR (400 MHz, CDCl<sub>3</sub>) δ 8.84 (d, *J* = 6.8 Hz, 2H), 8.36 (d, *J* = 7.6 Hz, 1H), 8.27 (d,

$J = 8.0$  Hz, 1H), 8.16 (d,  $J = 7.2$  Hz, 1H), 7.63-7.50 (m, 6H), 7.38 (d,  $J = 7.2$  Hz, 1H), 2.86 (s, 3H);  $^{13}\text{C}$  NMR (100 MHz,  $\text{CDCl}_3$ )  $\delta$  149.5, 144.3, 140.6, 139.7, 136.7, 133.9, 130.5, 130.3, 130.1, 129.3, 128.6, 128.4, 126.6, 125.3, 124.4, 122.1, 114.4, 112.2, 18.5; HRMS (ESI-TOF)  $m/z$ :  $[\text{M} + \text{H}]^+$  calcd for  $\text{C}_{21}\text{H}_{16}\text{N}_3$  310.1339, found 310.1338.

**6-Phenyl-3-(trifluoromethyl)benzo[4,5]imidazo[1,2-*a*]quinoxaline (2v).** 1.5 h; eluent: EtOAc/PE 3:97; 173 mg, 95% yield; yellow solid, mp 162-163 °C;  $^1\text{H}$  NMR (400 MHz,  $\text{CDCl}_3$ )  $\delta$  8.65-8.63 (m, 2H), 8.27 (d,  $J = 1.2$  Hz, 1H), 8.15 (d,  $J = 8.8$  Hz, 1H), 7.98 (d,  $J = 8.0$  Hz, 1H), 7.90-7.88 (m, 1H), 7.70 (dd,  $J = 8.8, 2.0$  Hz, 1H), 7.53-7.47 (m, 3H), 7.40-7.33 (m, 2H);  $^{13}\text{C}$  NMR (100 MHz,  $\text{CDCl}_3$ )  $\delta$  152.4, 143.9, 140.0, 135.4, 134.8, 131.1, 130.9 (q,  $J_{\text{C-F}} = 0.9$  Hz), 130.0, 129.5, 128.4, 128.2 (q,  $J_{\text{C-F}} = 3.9$  Hz), 127.3 (q,  $J_{\text{C-F}} = 33.3$  Hz), 125.6, 125.1, 125.0 (q,  $J_{\text{C-F}} = 3.5$  Hz), 123.7, (q,  $J_{\text{C-F}} = 270.5$  Hz), 122.3, 114.7, 113.6; HRMS (ESI-TOF)  $m/z$ :  $[\text{M} + \text{H}]^+$  calcd for  $\text{C}_{21}\text{H}_{13}\text{F}_3\text{N}_3$  364.1056, found 364.1054.

**3-Chloro-6-phenylbenzo[4,5]imidazo[1,2-*a*]quinoxaline (2w).** 2 h; eluent: EtOAc/ $\text{CH}_2\text{Cl}_2$ /PE 4:8:88; 162 mg, 98% yield; yellow solid, mp 200-201 °C;  $^1\text{H}$  NMR (400 MHz,  $\text{CDCl}_3$ )  $\delta$  8.68-8.66 (m, 2H), 8.13-8.01 (m, 4H), 7.57-7.55 (m, 3H), 7.48-7.41 (m, 3H);  $^{13}\text{C}$  NMR (100 MHz,  $\text{CDCl}_3$ )  $\delta$  152.4, 143.9, 140.1, 136.1, 135.7, 131.0, 130.6, 130.11, 130.06, 129.6, 128.8, 128.4, 127.5, 125.5, 124.9, 122.3, 115.1, 113.7; HRMS (ESI-TOF)  $m/z$ :  $[\text{M} + \text{H}]^+$  calcd for  $\text{C}_{20}\text{H}_{13}\text{ClN}_3$  330.0793, found 330.0795.

**2-Chloro-6-phenylbenzo[4,5]imidazo[1,2-*a*]quinoxaline (2x).** 1 h; eluent: EtOAc/ $\text{CH}_2\text{Cl}_2$ /PE 5:5:90; 161 mg, 98% yield; yellow solid, mp 214-215 °C;  $^1\text{H}$  NMR (400 MHz,  $\text{CDCl}_3$ )  $\delta$  8.75-8.73 (m, 2H), 8.48 (d,  $J = 2.0$  Hz, 1H), 8.39-8.36 (m, 1H), 8.20-8.15 (m, 2H), 7.66-7.56 (m, 6H);  $^{13}\text{C}$  NMR (100 MHz,  $\text{CDCl}_3$ )  $\delta$  152.0, 144.3, 140.4, 135.9, 134.8, 134.1, 132.0, 130.9, 130.0, 129.9, 129.7, 128.5, 126.0,



125.7, 125.1, 122.5, 114.5, 114.0; HRMS (ESI-TOF)  $m/z$ :  $[M + H]^+$  calcd for  $C_{20}H_{13}ClN_3$  330.0793, found 330.0794.

**2-Chloro-3-methyl-6-phenylbenzo[4,5]imidazo[1,2-*a*]quinoxaline (2y).** 3.5 h; eluent:  $CH_2Cl_2/PE$  20:80; 169 mg, 98% yield; yellow solid, mp 201-202 °C;  $^1H$  NMR (400 MHz,  $CDCl_3$ )  $\delta$  8.69-8.66 (m, 2H), 8.25 (s, 1H), 8.19-8.15 (m, 1H), 8.10-8.06 (m, 1H), 7.91 (s, 1H), 7.61-7.49 (m, 5H), 2.43 (s, 3H);  $^{13}C$  NMR (100 MHz,  $CDCl_3$ )  $\delta$  151.6, 144.1, 140.2, 136.0, 135.1, 134.1, 133.6, 132.1, 130.8, 129.9, 129.7, 128.4, 127.6, 125.4, 124.8, 122.2, 114.5, 113.8, 19.8; HRMS (ESI-TOF)  $m/z$ :  $[M + H]^+$  calcd for  $C_{21}H_{15}ClN_3$  344.0949, found 344.0948.

**9,10-Dimethyl-6-phenylbenzo[4,5]imidazo[1,2-*a*]quinoxaline (2z).** 2 h; eluent:  $EtOAc/CH_2Cl_2/PE$  3:3:92; 153 mg, 95% yield; yellow solid, mp 190-191 °C;  $^1H$  NMR (400 MHz,  $CDCl_3$ )  $\delta$  8.70 (d,  $J = 7.2$  Hz, 2H), 8.23 (d,  $J = 8.4$  Hz, 1H), 8.10 (d,  $J = 8.0$  Hz, 1H), 7.90 (s, 1H), 7.75 (s, 1H), 7.62-7.56 (m, 4H), 7.46 (t,  $J = 7.6$  Hz, 1H), 2.40 (s, 3H), 2.34 (s, 3H);  $^{13}C$  NMR (100 MHz,  $CDCl_3$ )  $\delta$  151.5, 142.9, 140.0, 136.4, 135.4, 134.8, 134.3, 130.7, 130.5, 130.0, 129.2, 128.7, 128.5, 128.4, 125.1, 121.6, 114.3, 113.8, 21.1, 20.5; HRMS (ESI-TOF)  $m/z$ :  $[M + H]^+$  calcd for  $C_{22}H_{18}N_3$  324.1495, found 324.1497.

## 5. References

- 1 P. Roy and A. Pramanik, One-pot sequential synthesis of 1,2-disubstituted benzimidazoles under metal-free conditions, *Tetrahedron Lett.*, 2013, **54**, 5243-5245.
- 2 K. K. Nanda and B. W. Trotter, POCl<sub>3</sub>-mediated synthesis of hydrolysis-prone 2-trifluoroethylbenzimidazoles, *Tetrahedron Lett.*, 2008, **49**, 5332-5335.
- 3 A. Huang, Y. Chen, Y. Zhou, W. Guo, X. Wu and C. Ma, An efficient one-pot synthesis of benzo[4,5]imidazo[1,2-*a*]quinoxalines via copper-catalyzed process, *Org. Lett.*, 2013, **15**, 5480-5483.
- 4 D. H. Lee, H. Nam, Y. H. Kim and S. Y. P. Jeon, T Y, Heterocyclic compound containing nitrogen for an organic electronic device, Korean Patent, KR2012061056A, 2012062012.

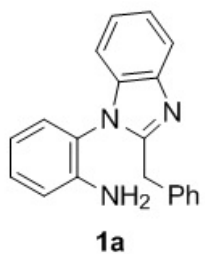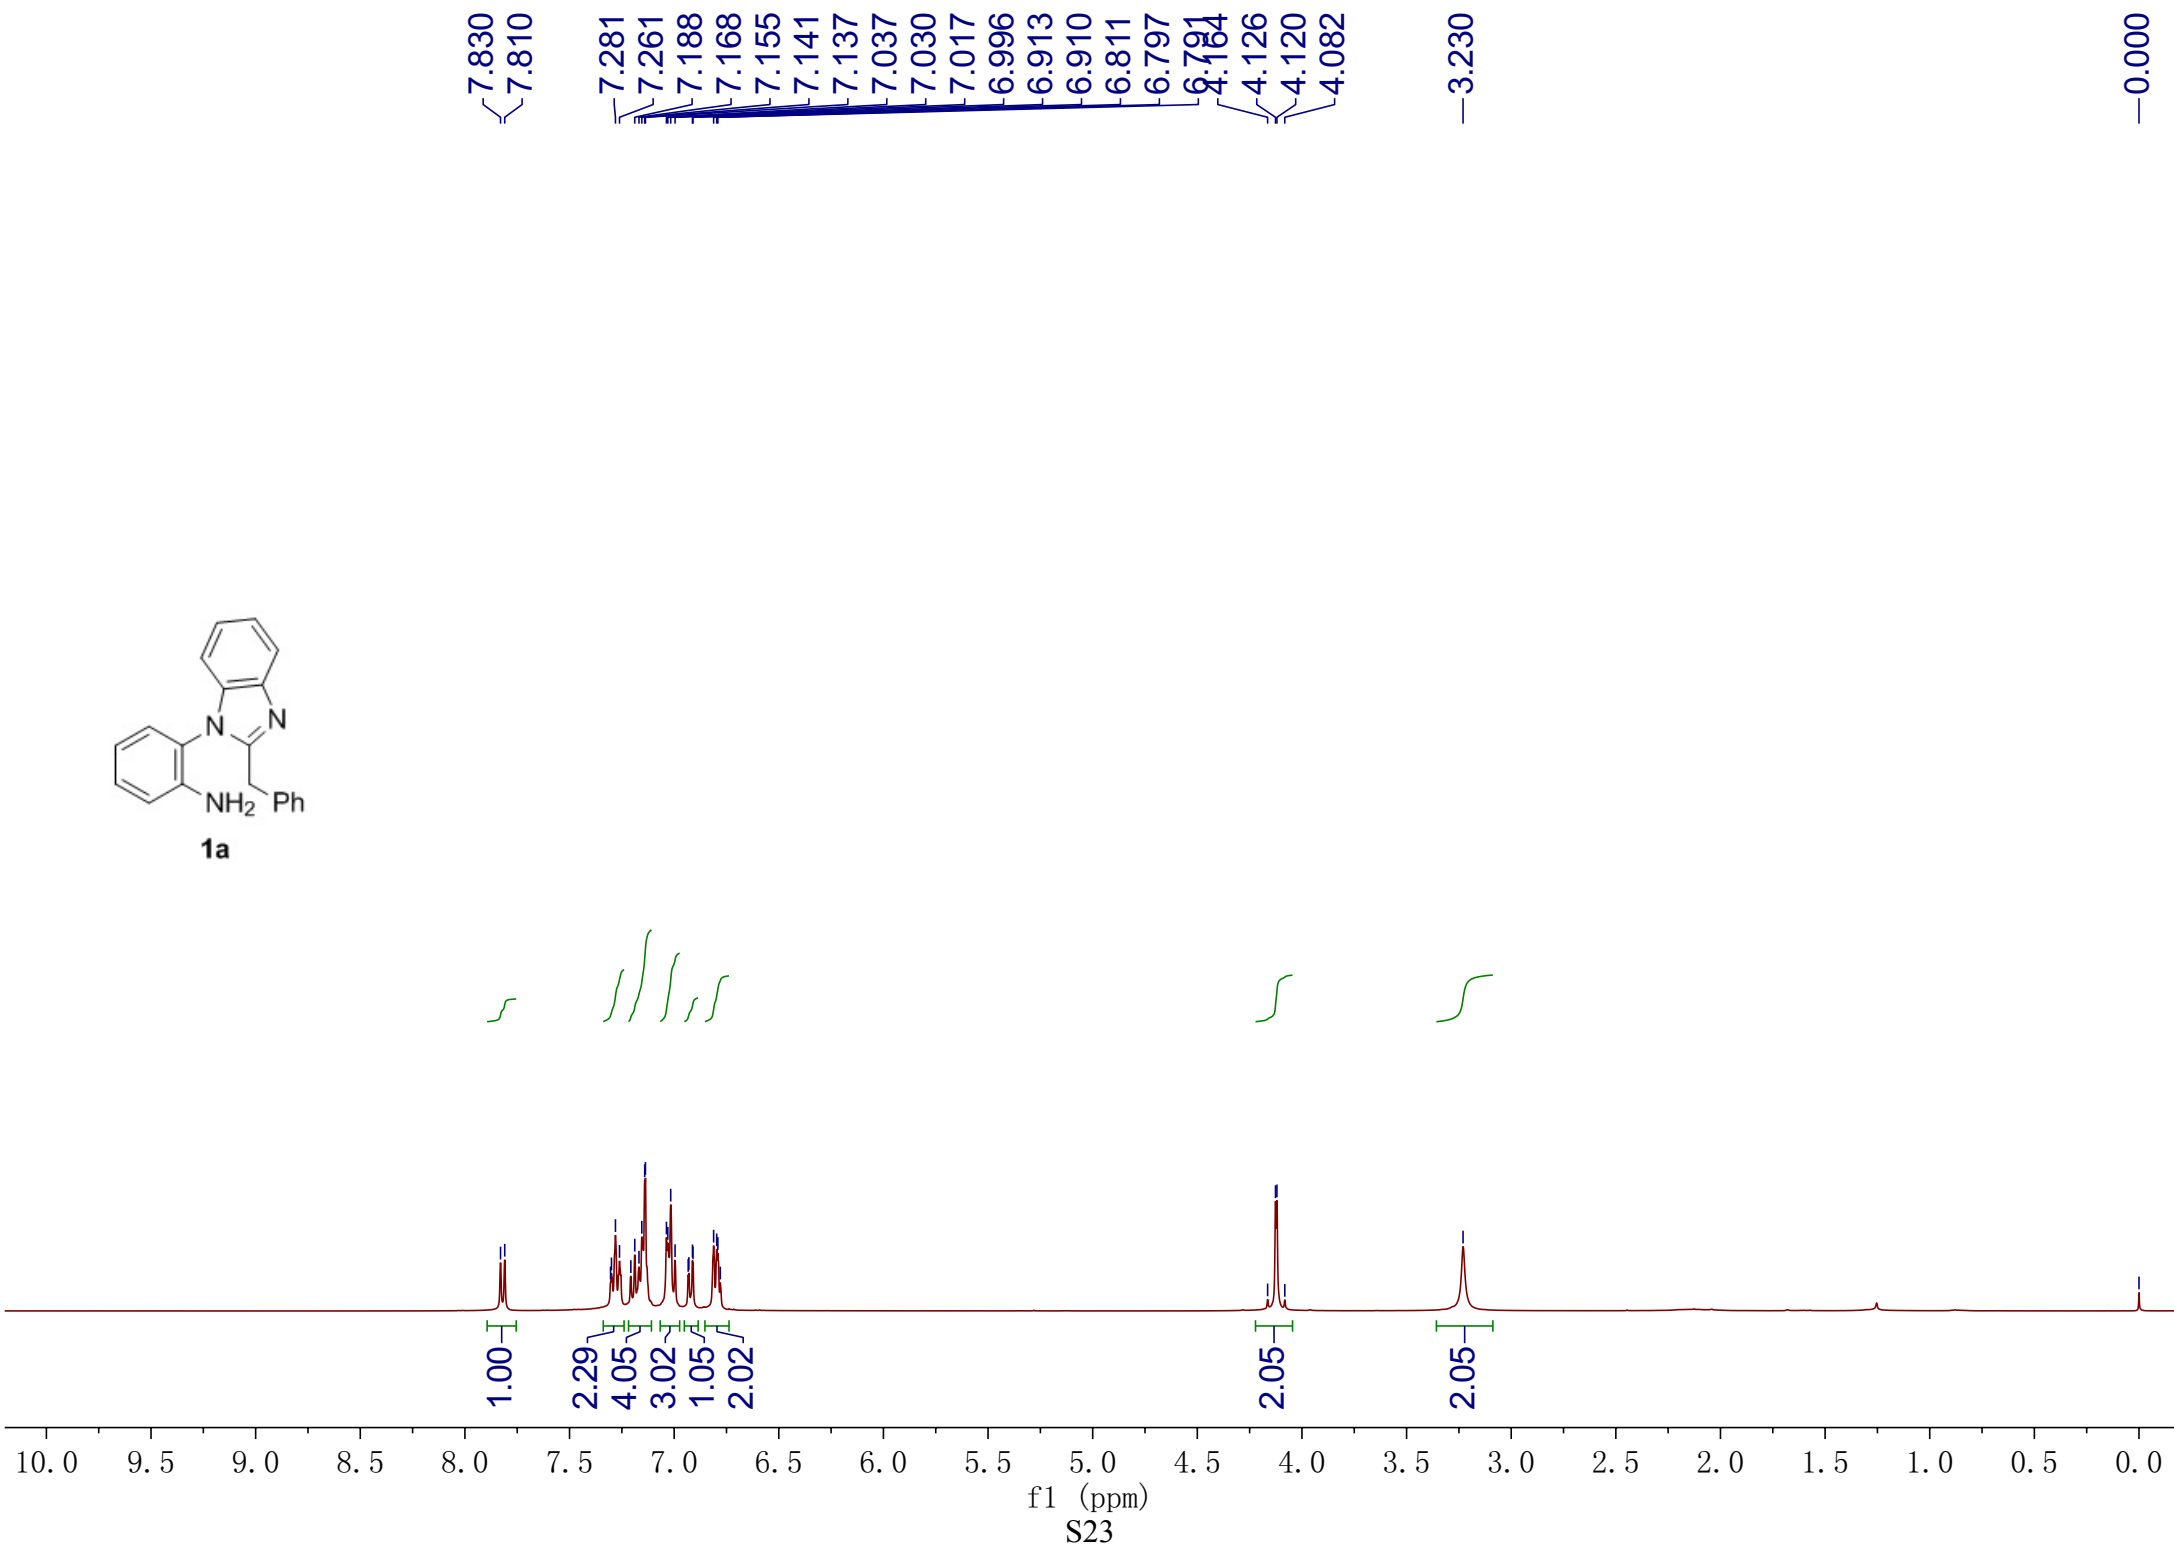

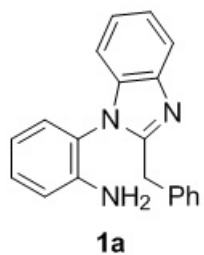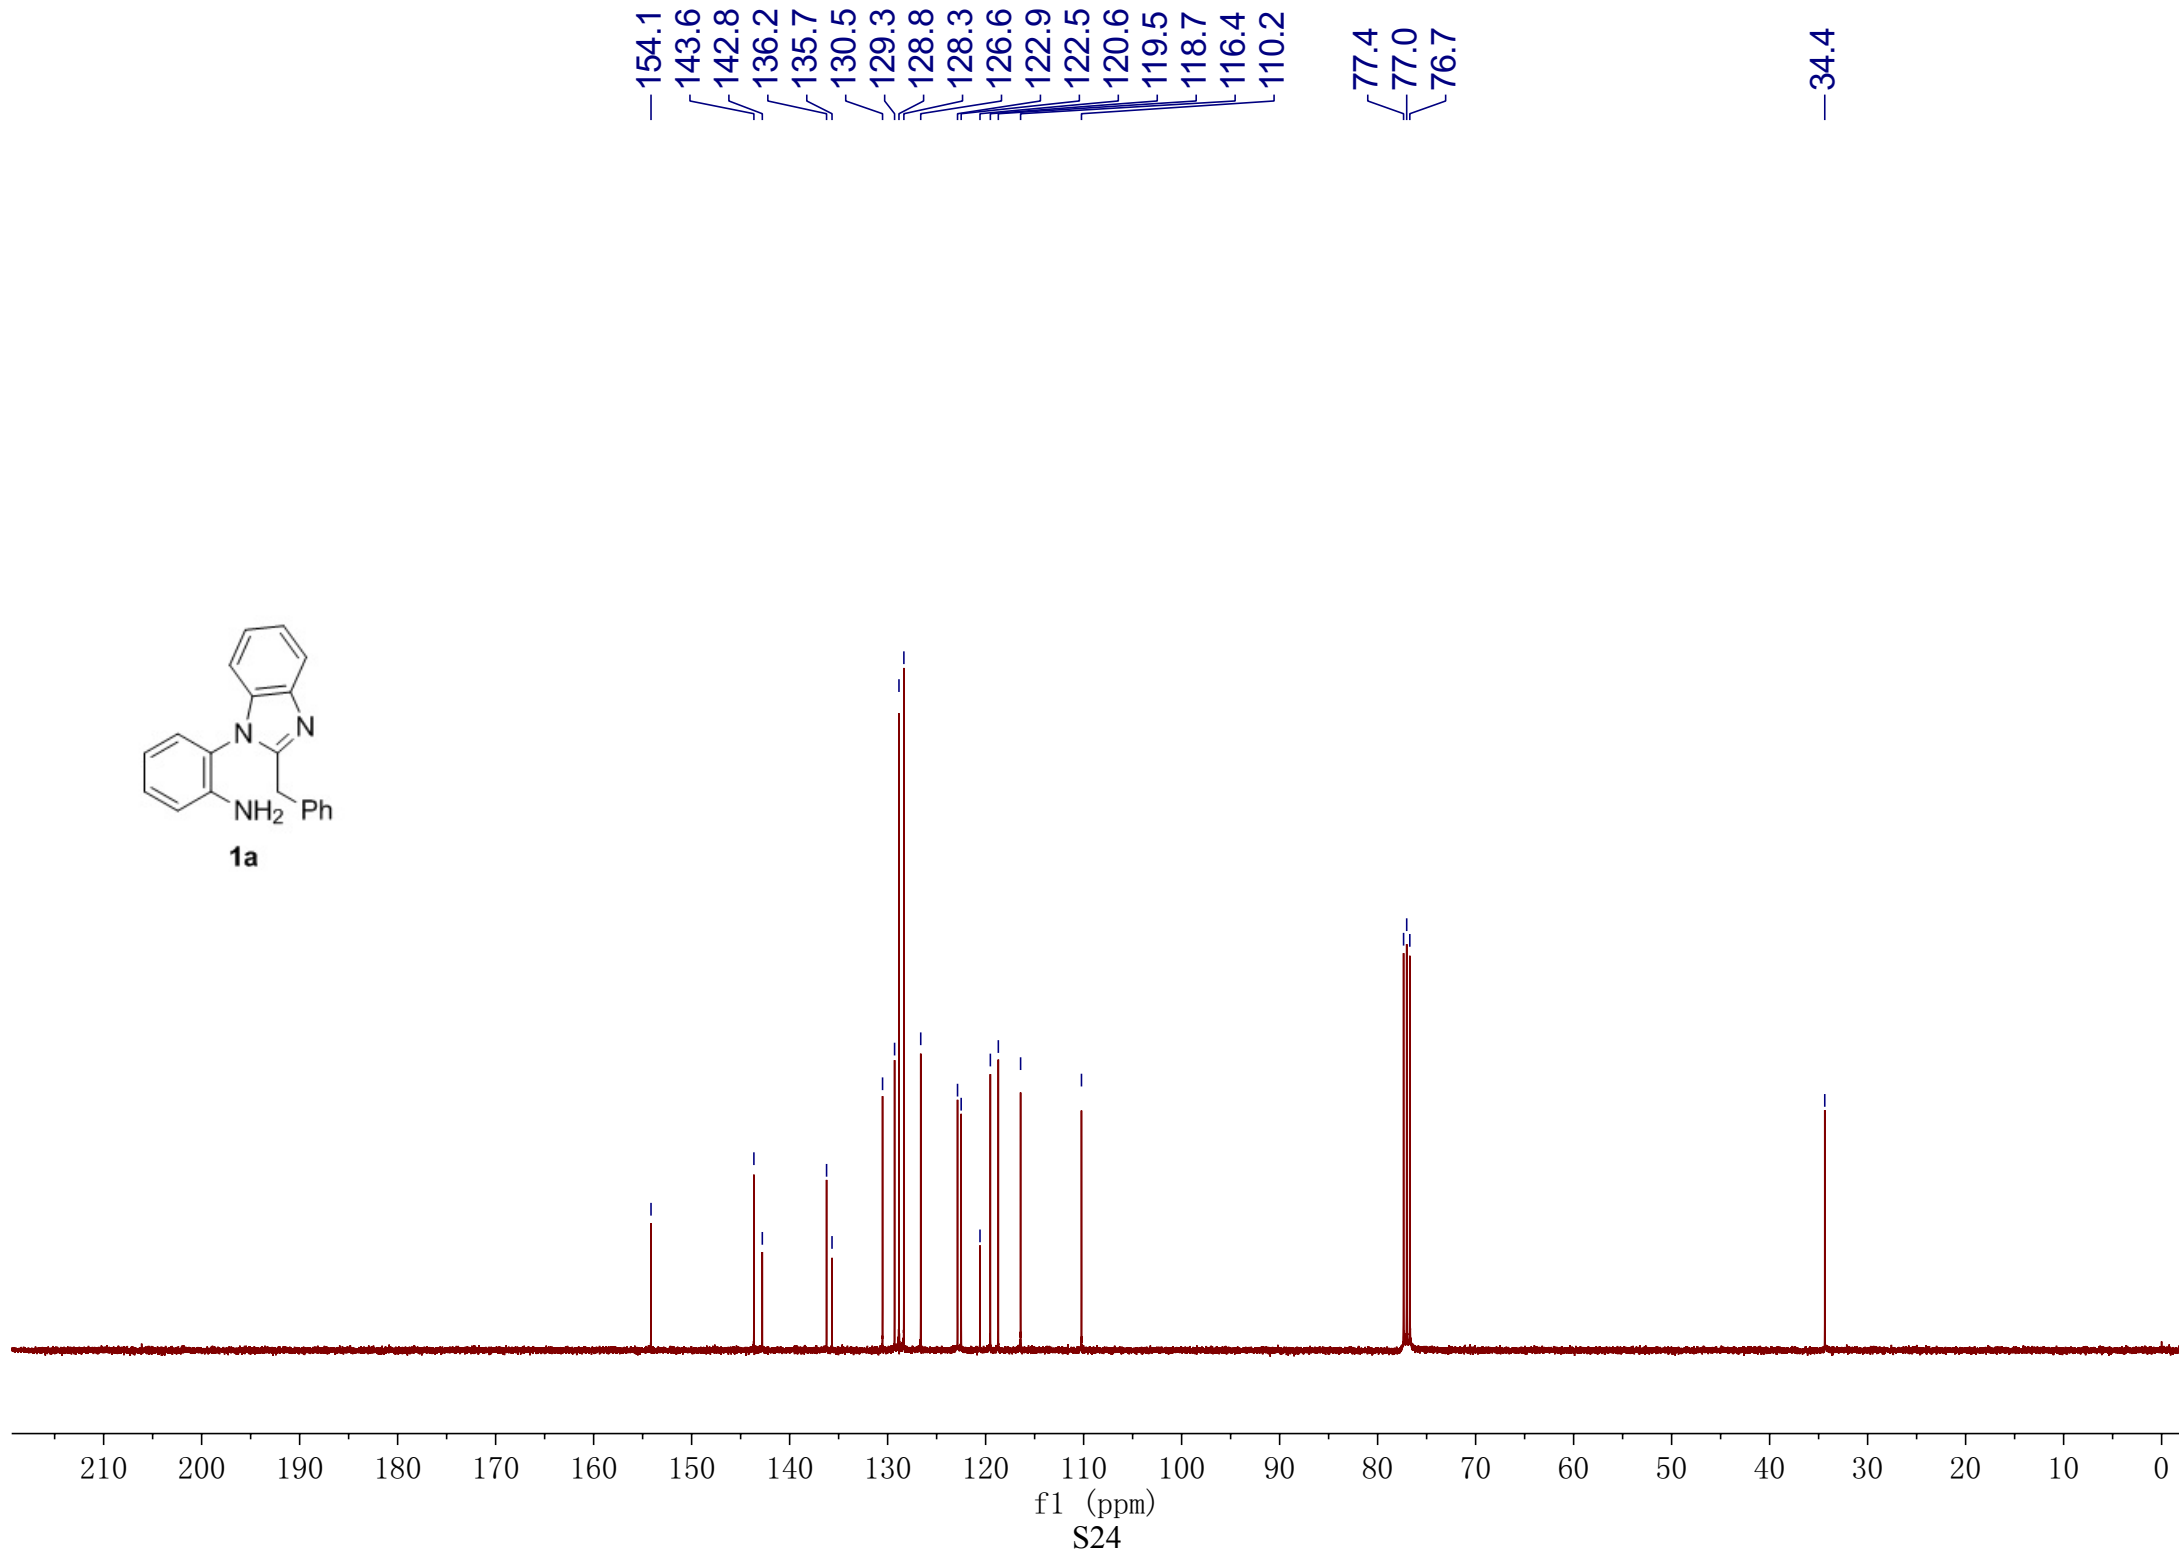

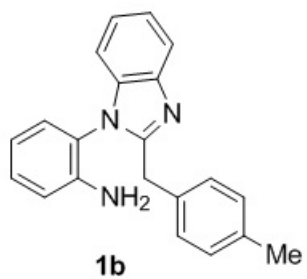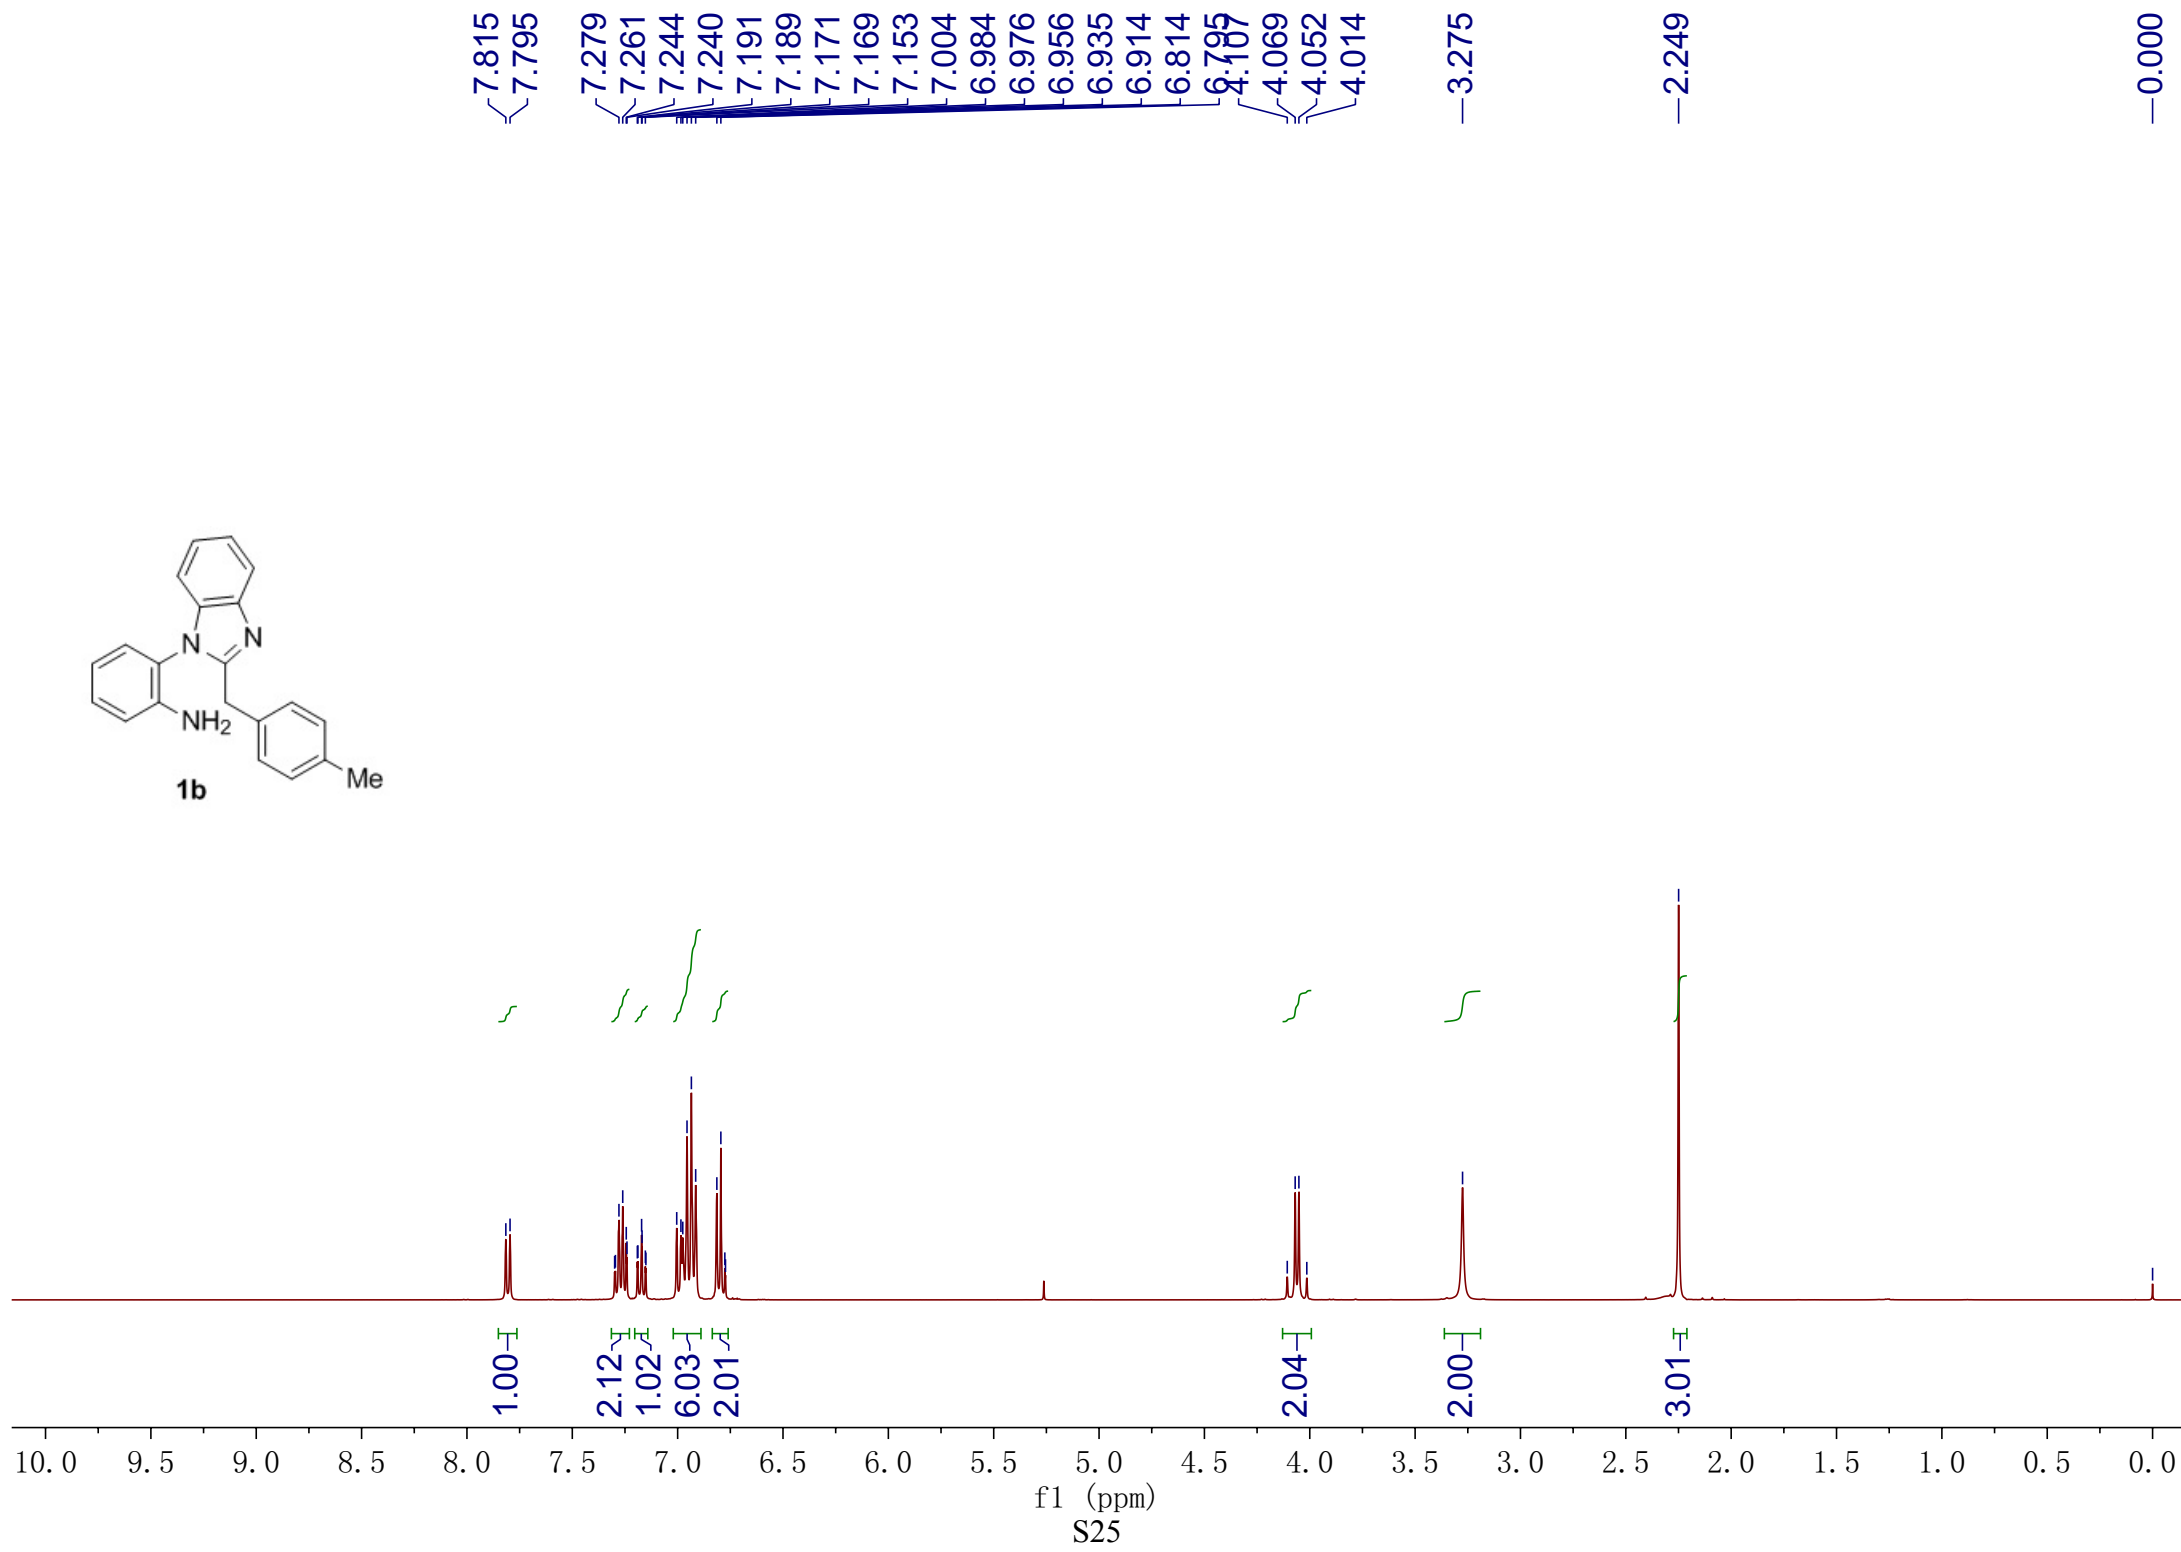

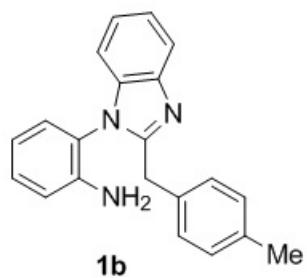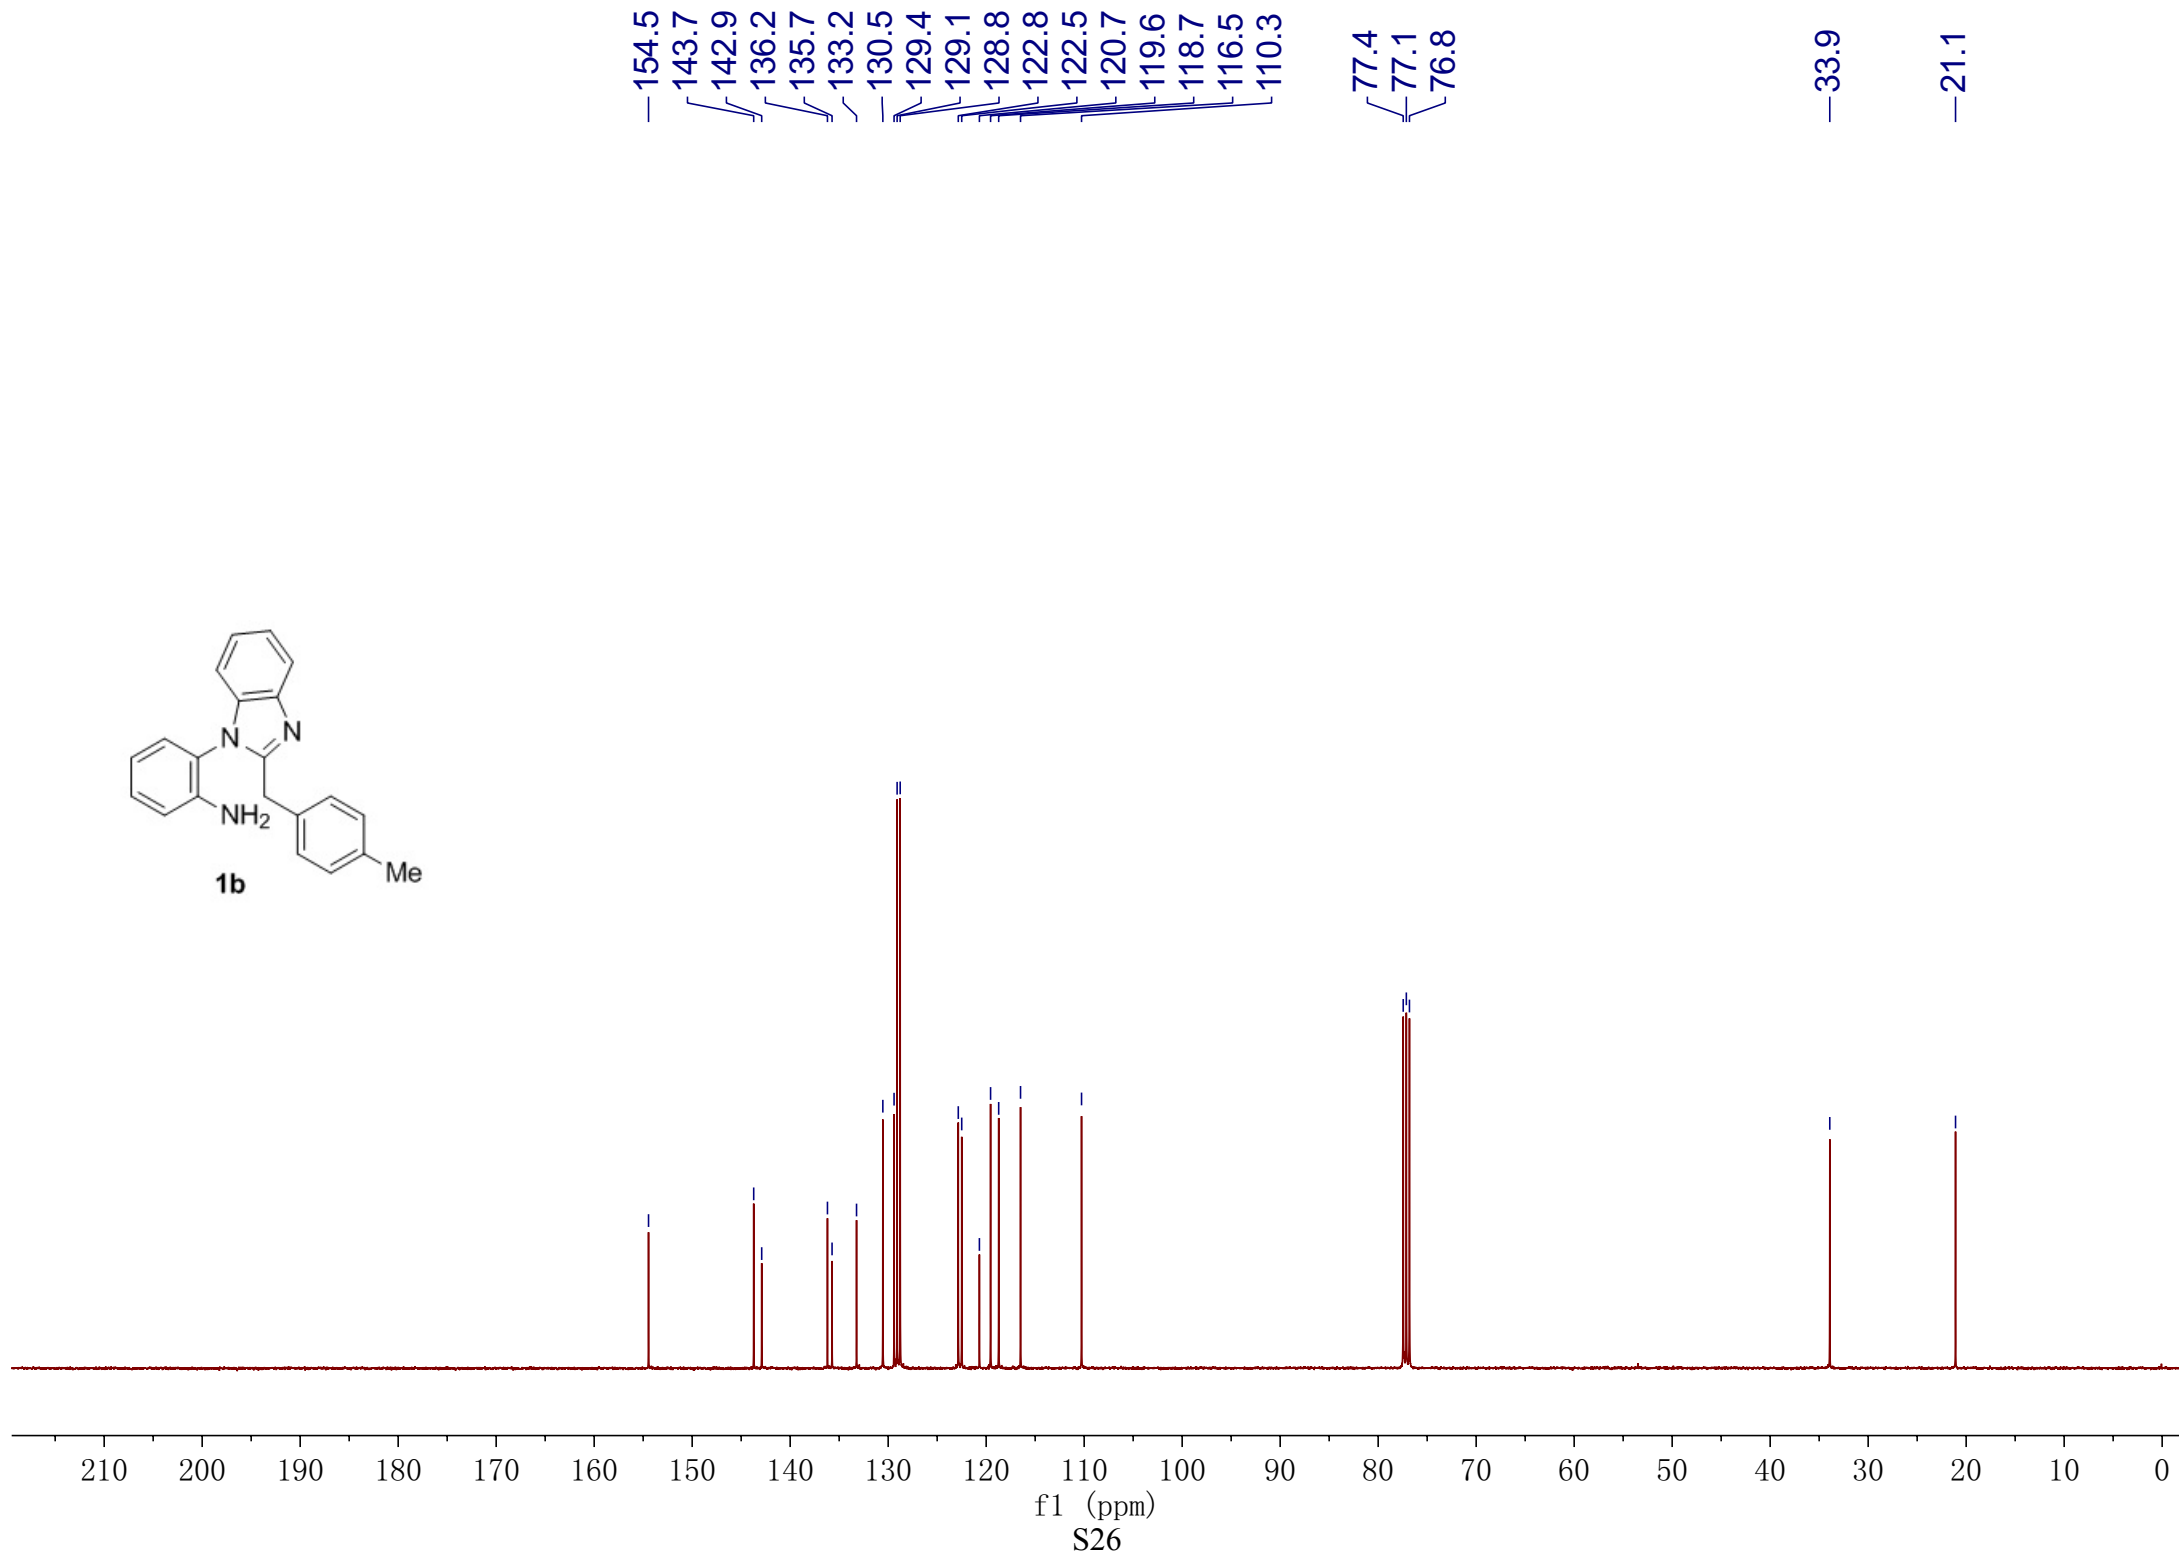

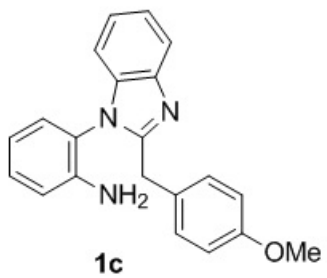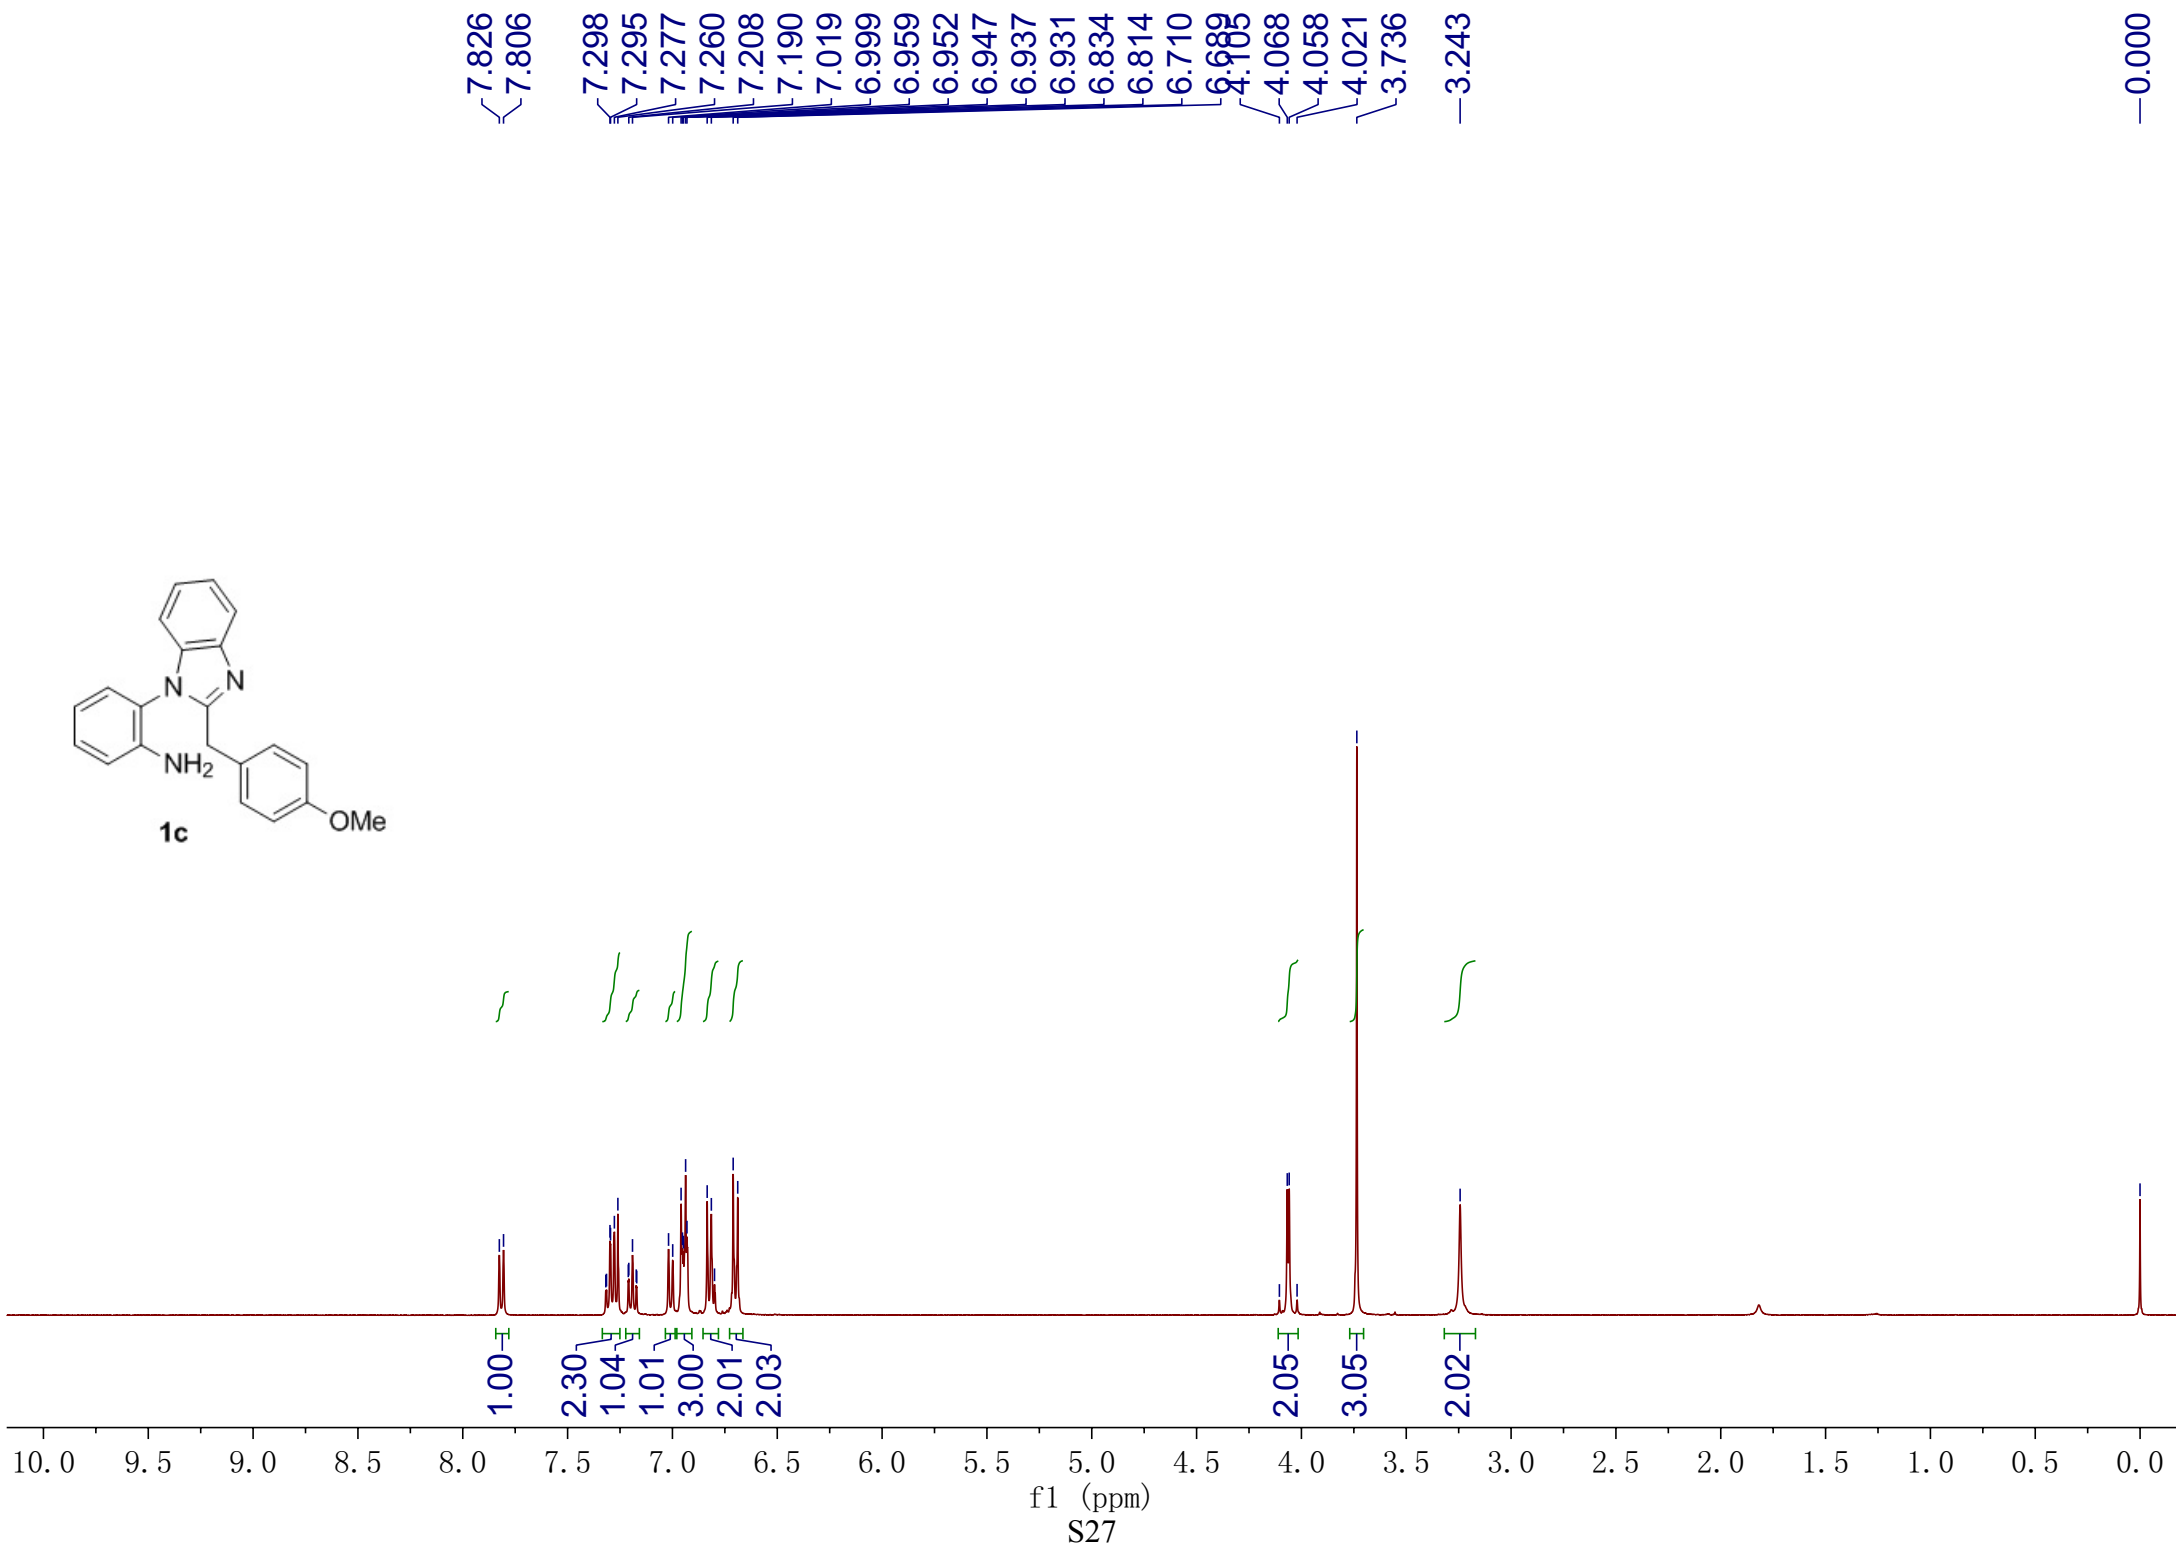

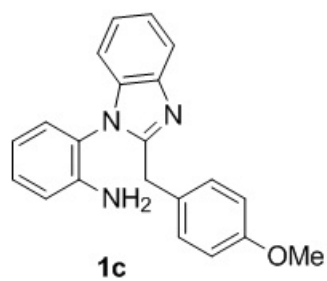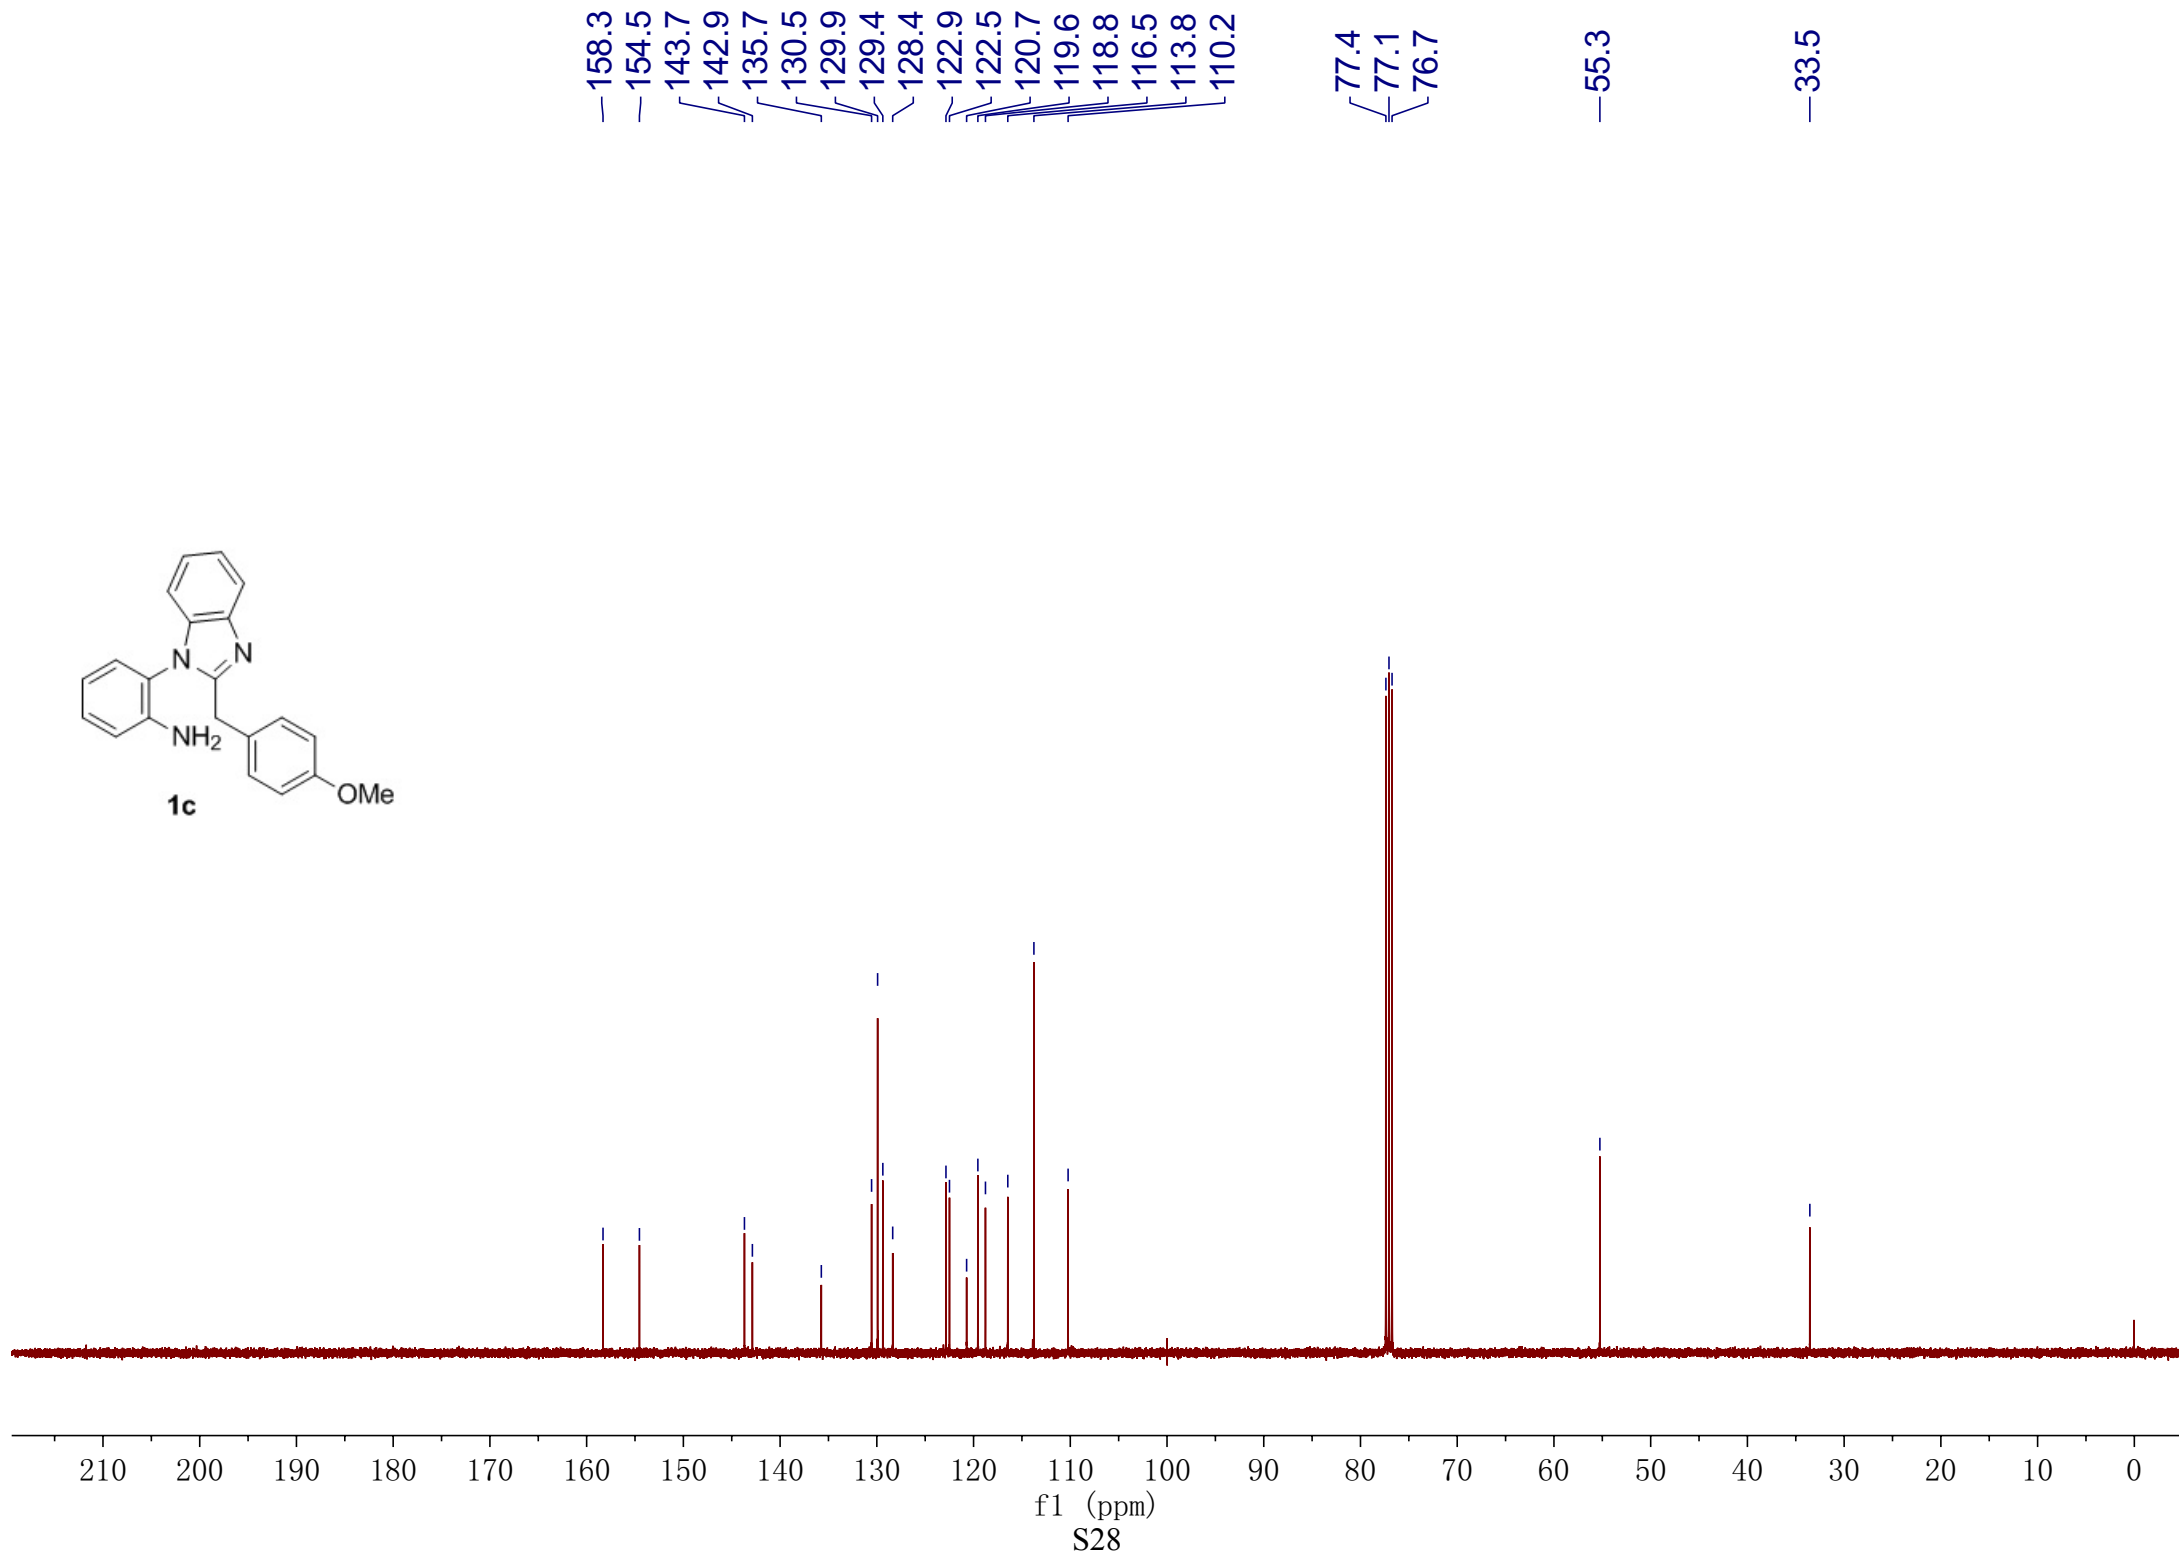



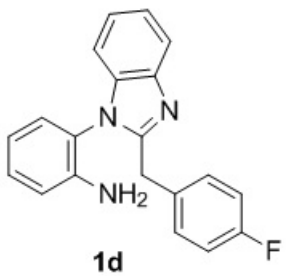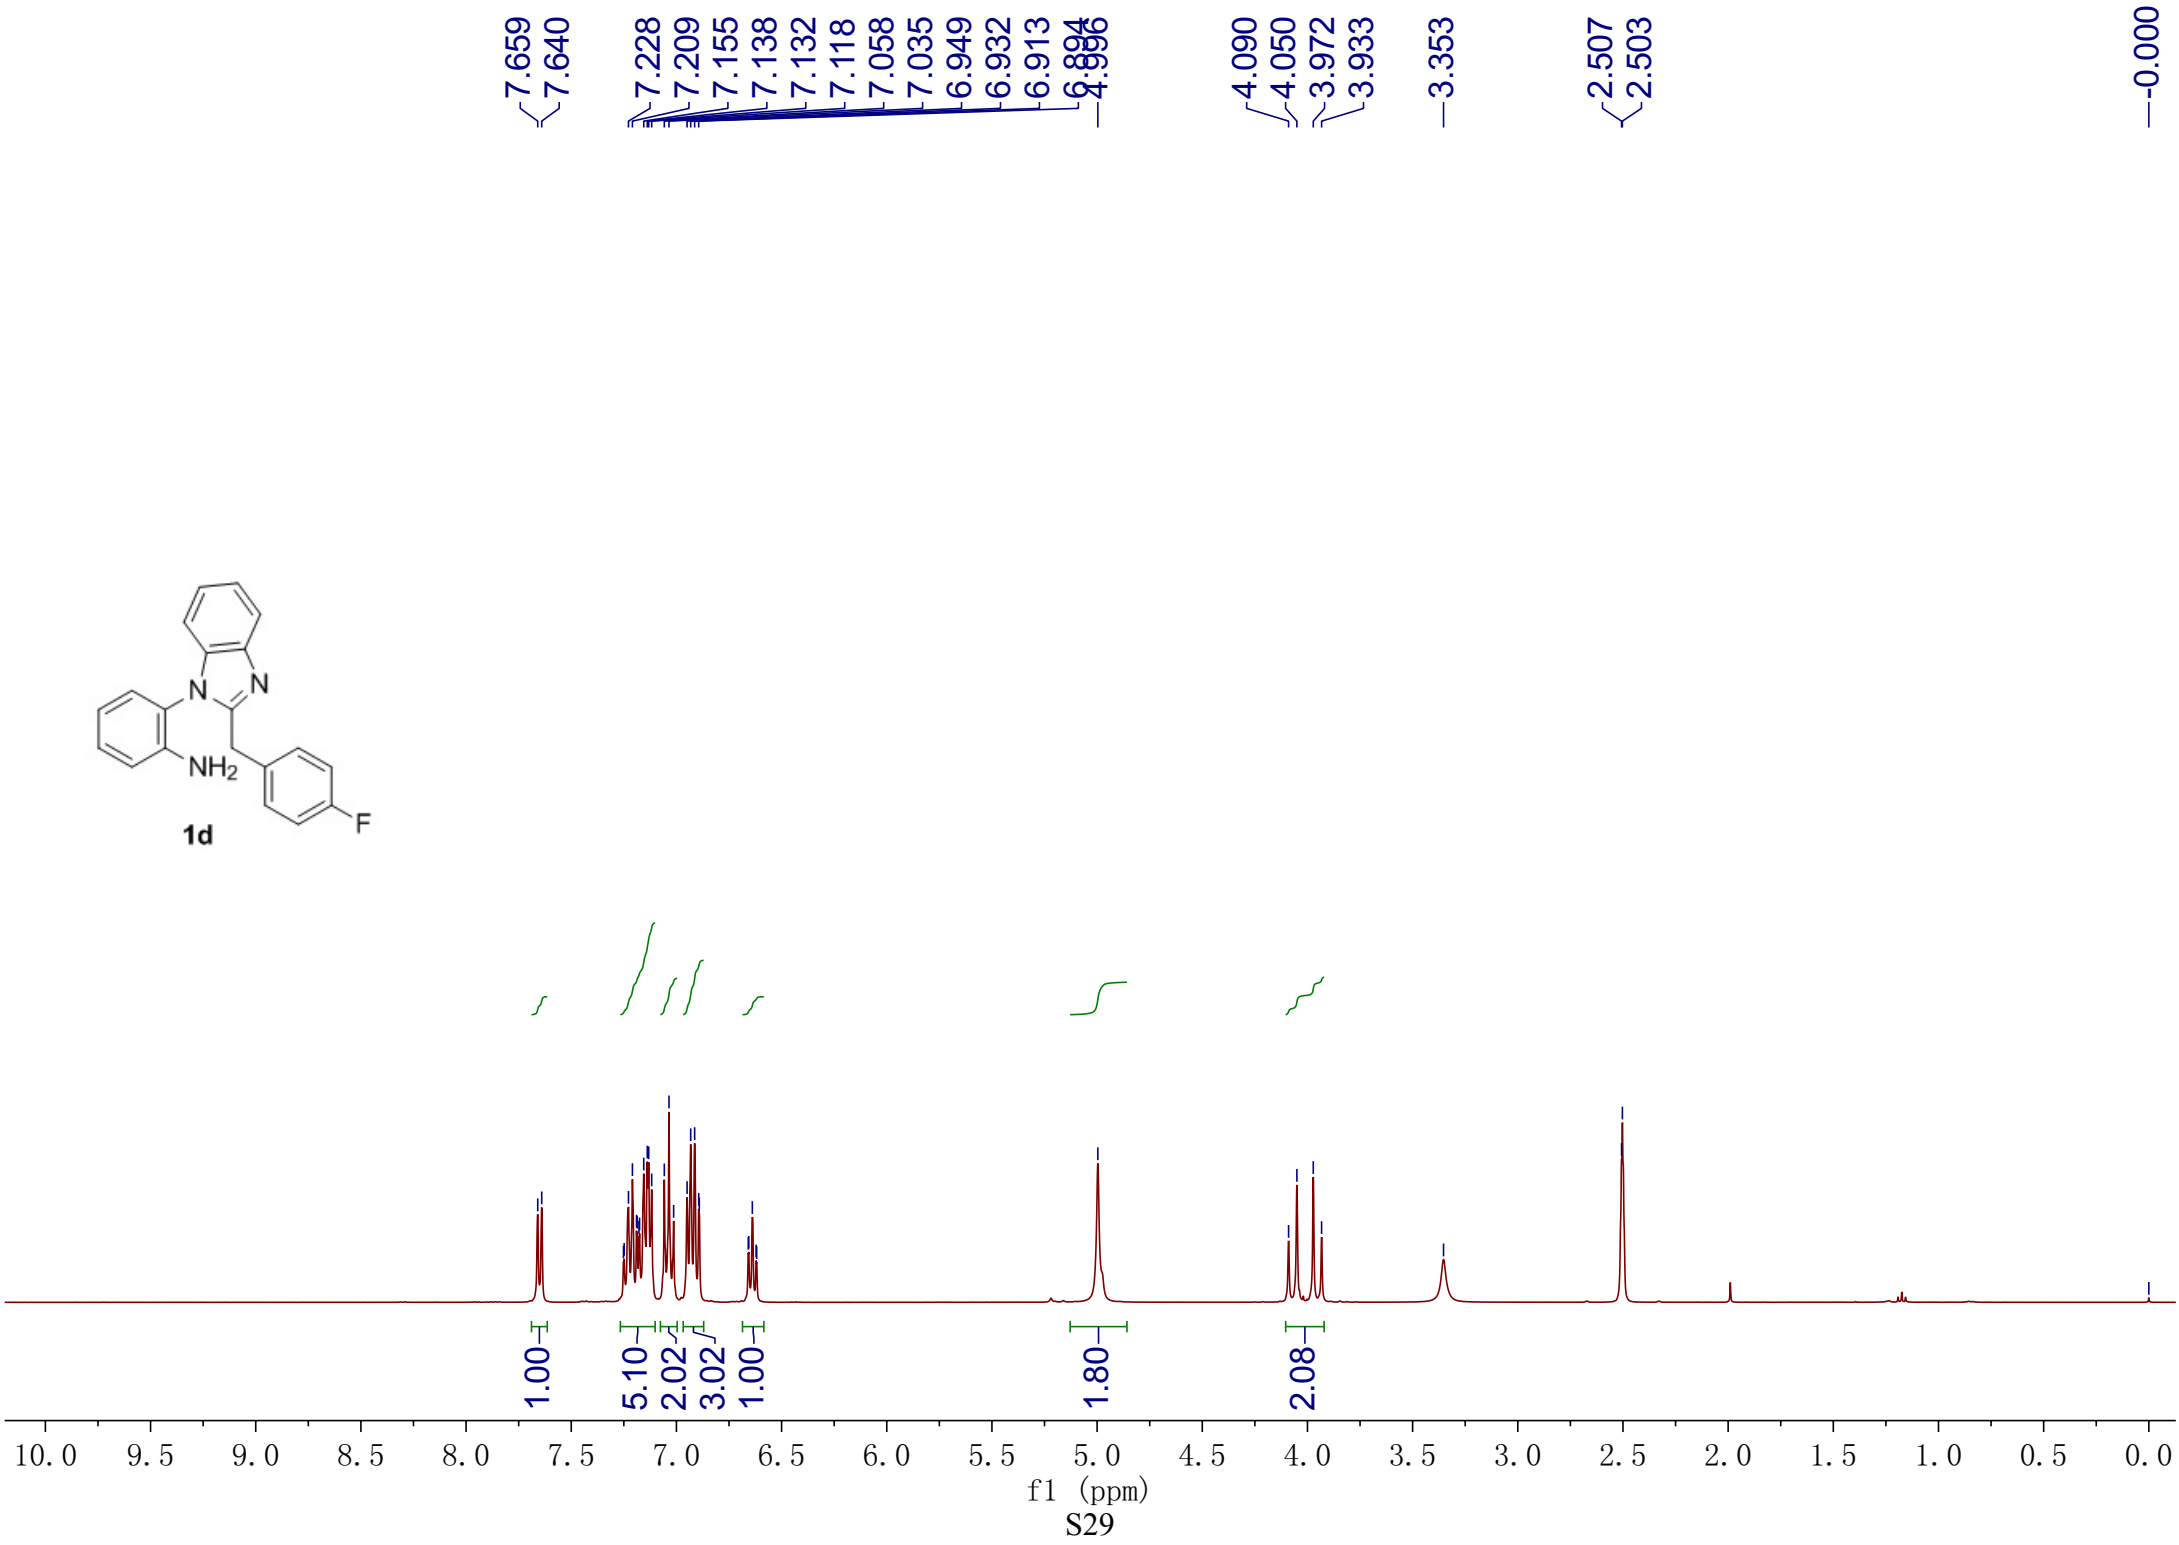

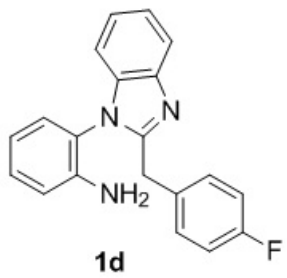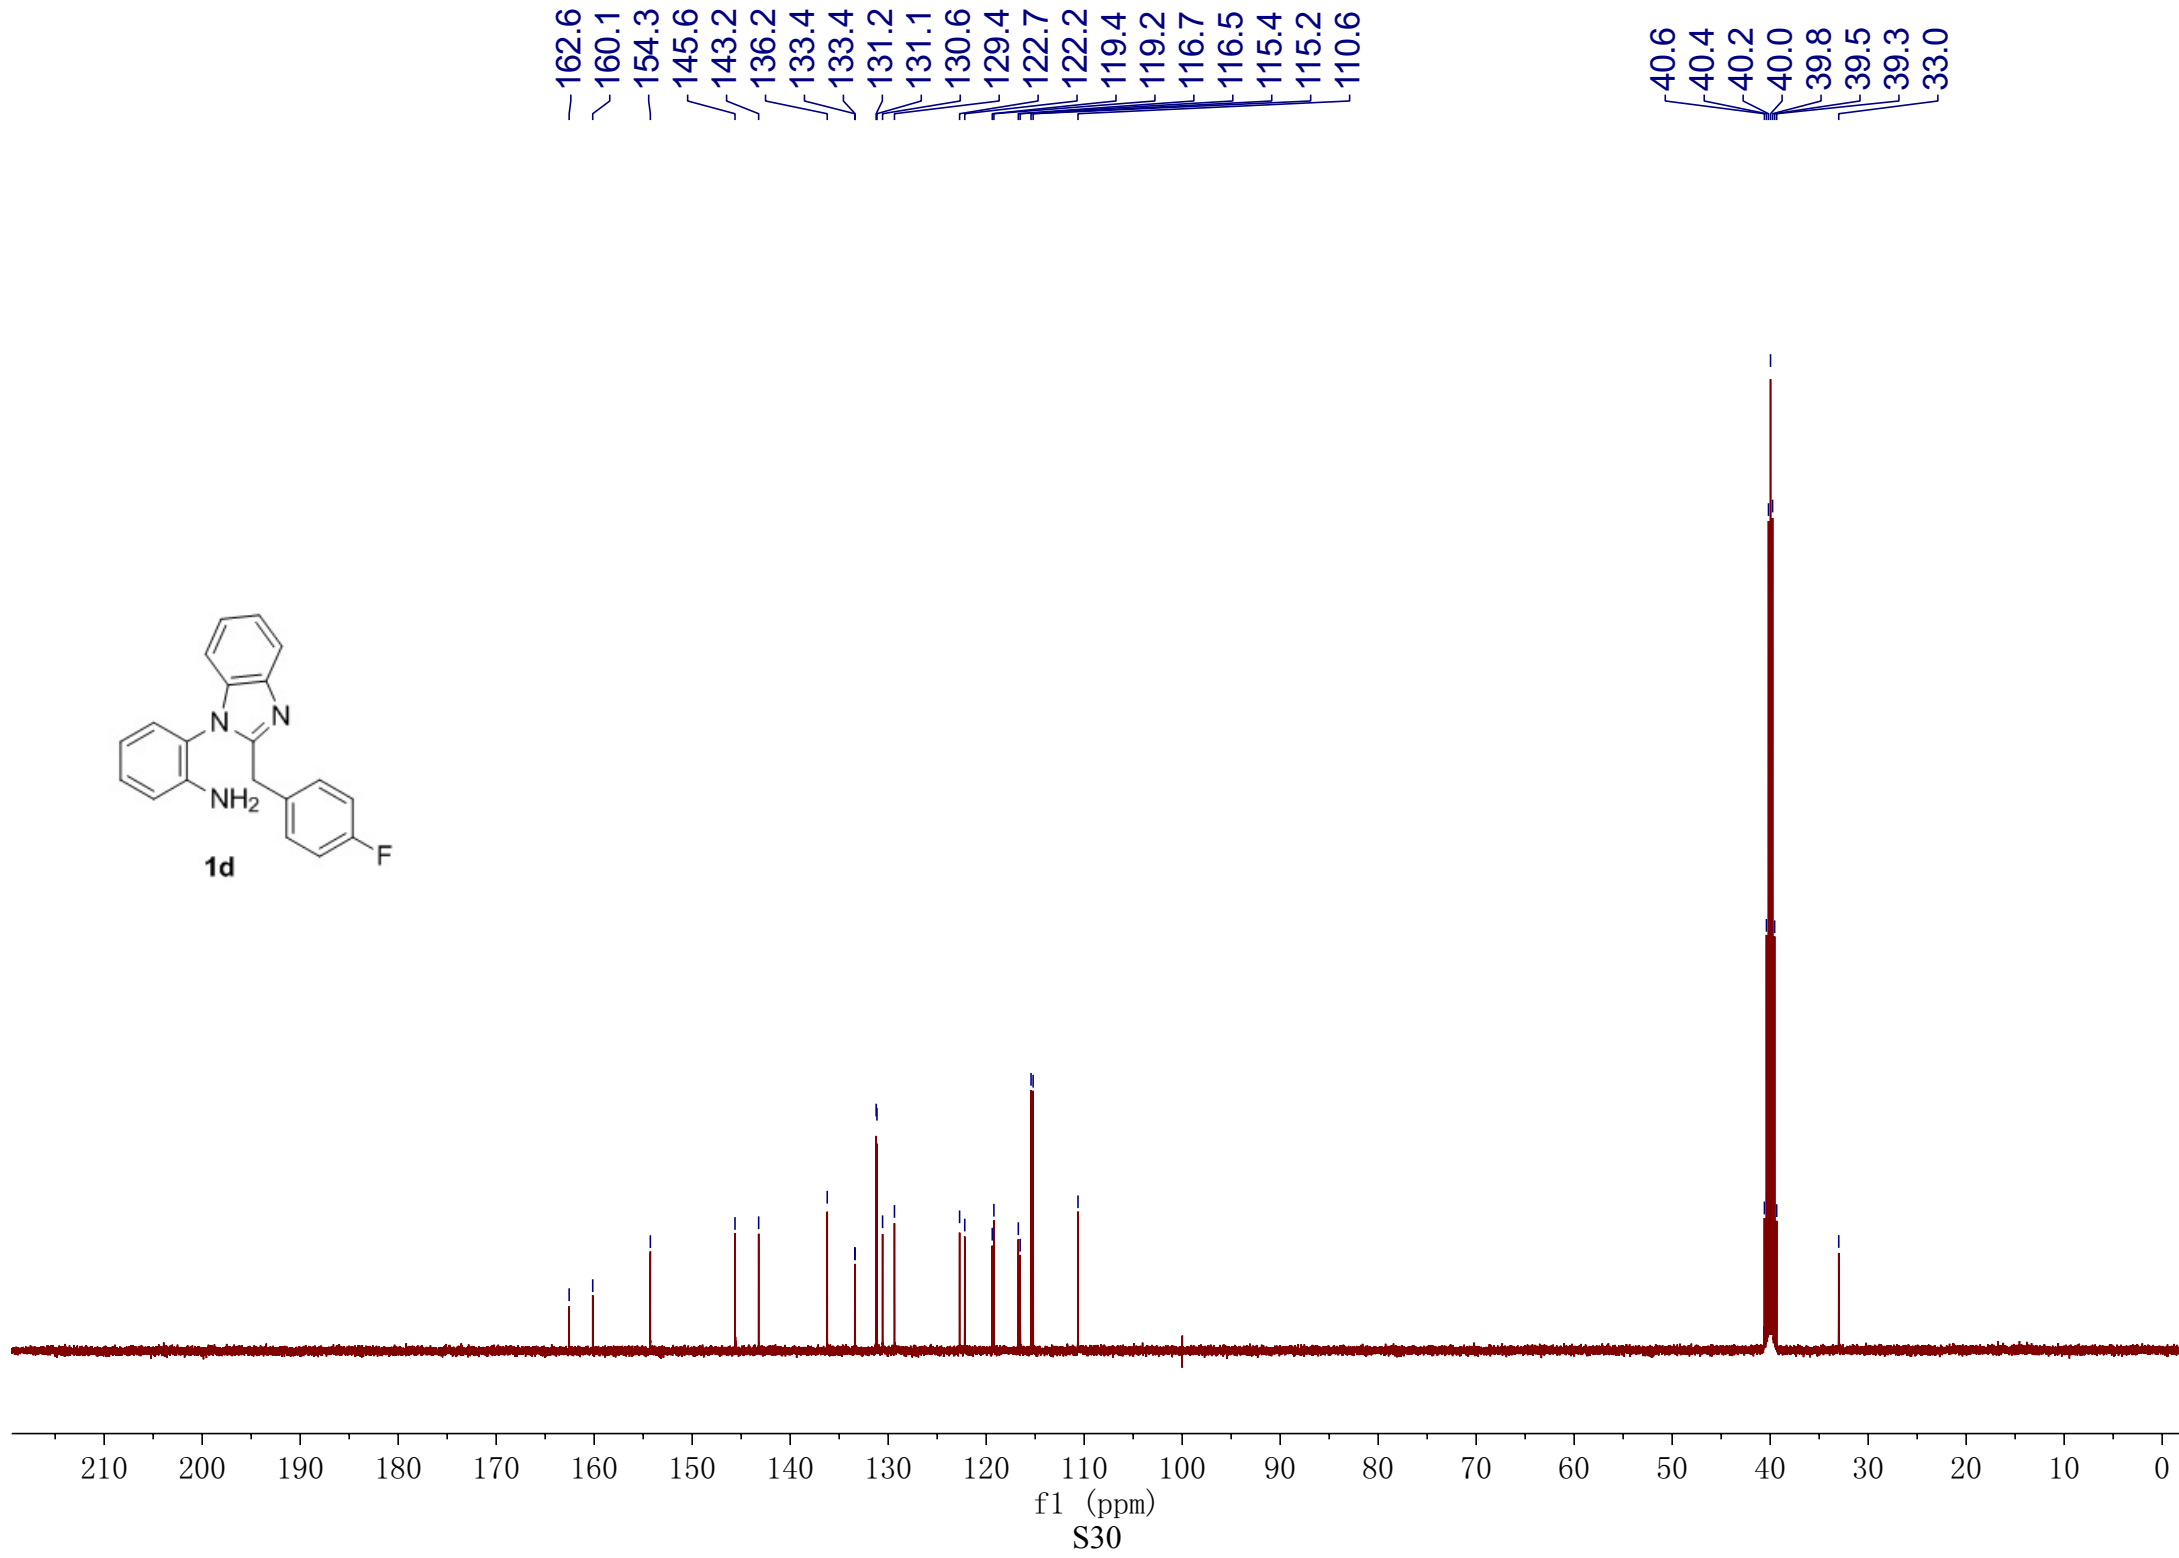

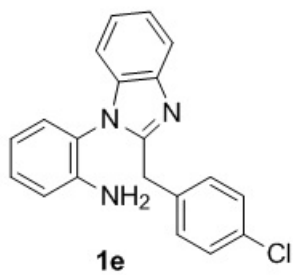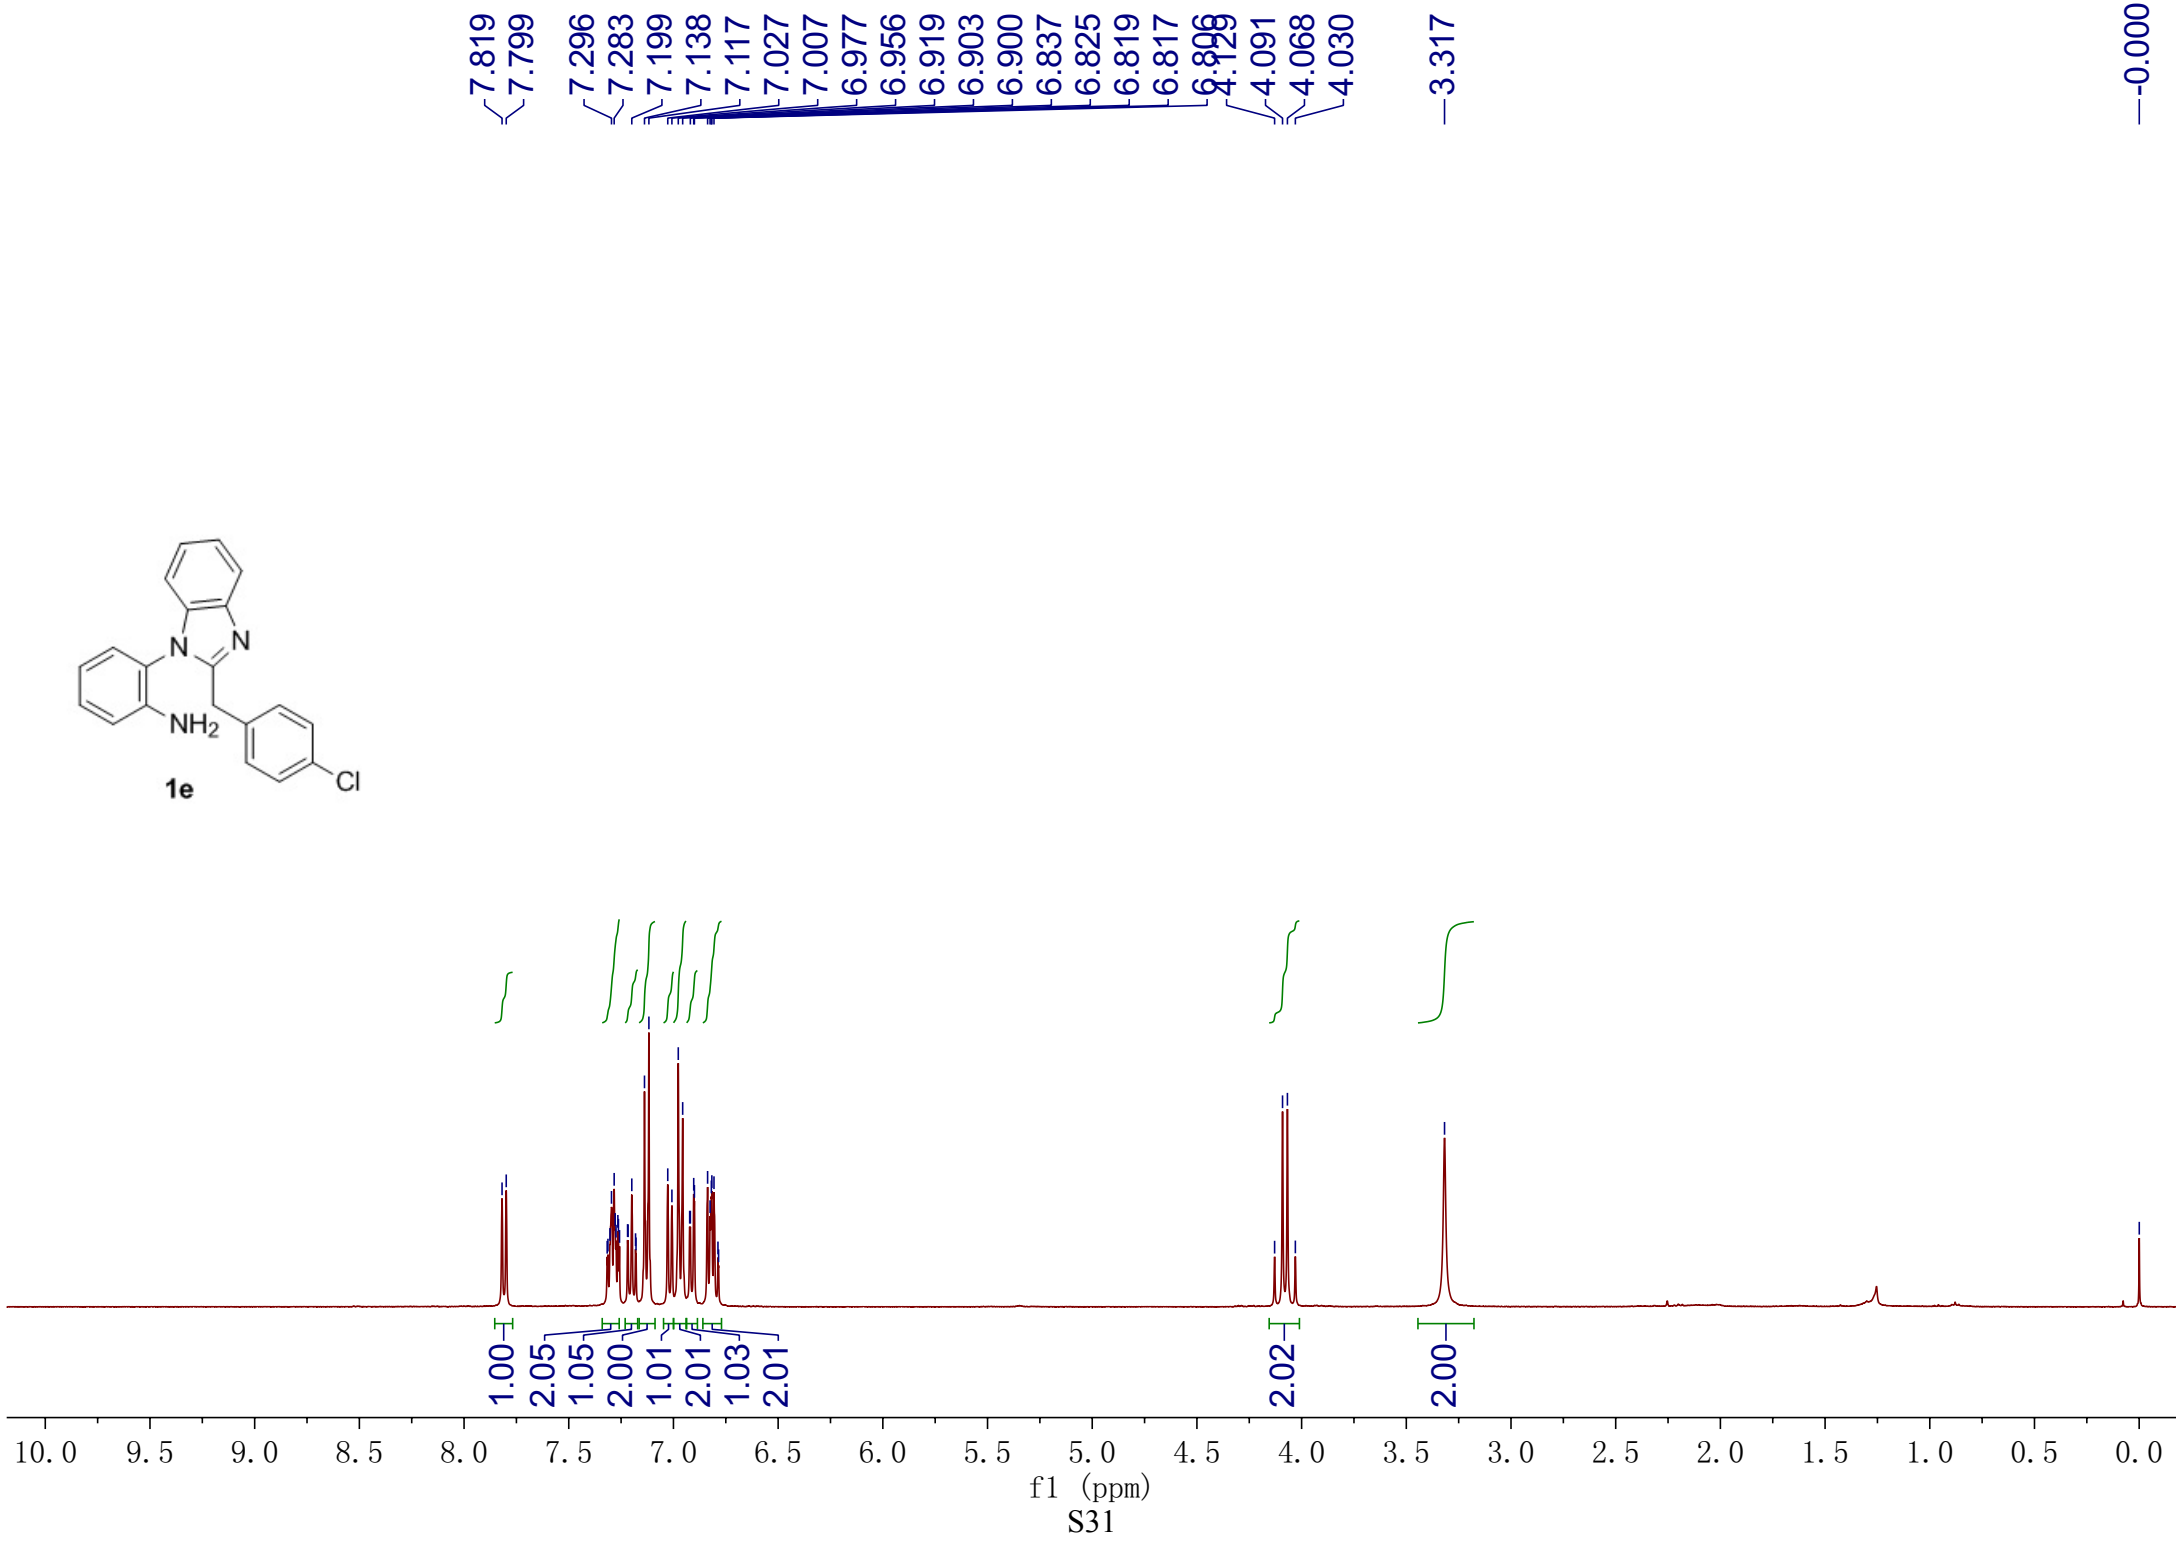

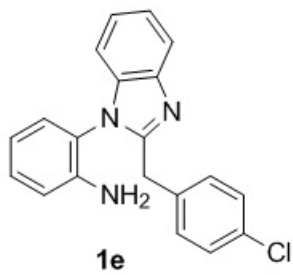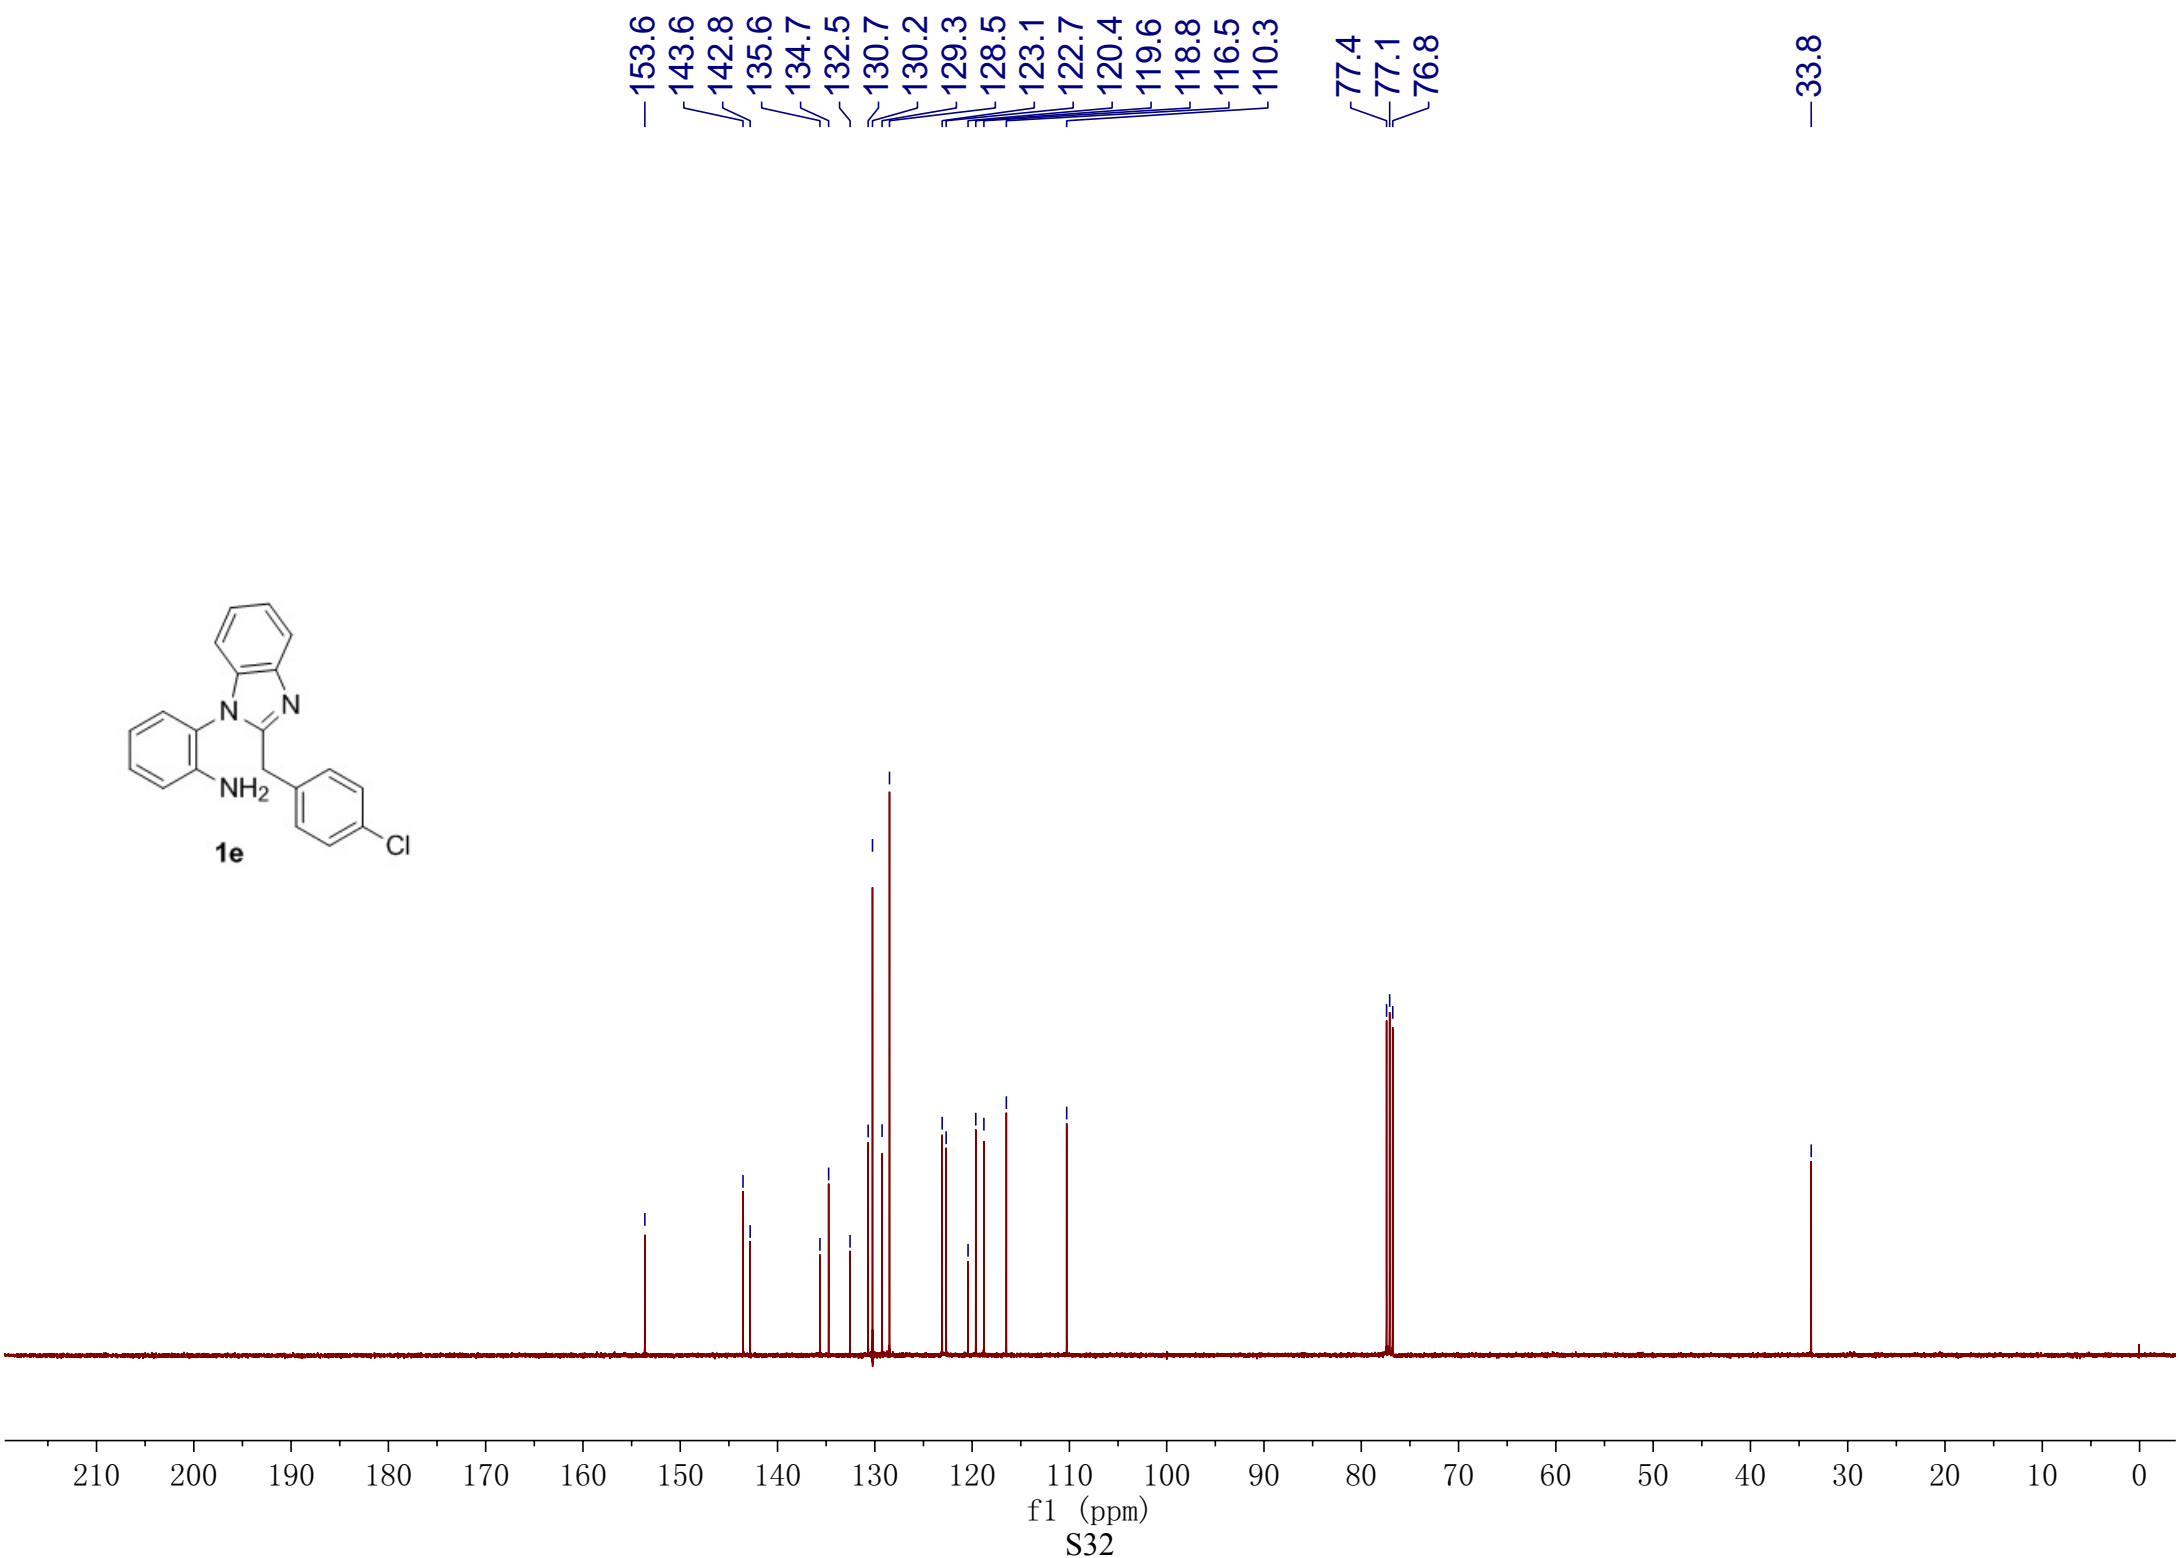

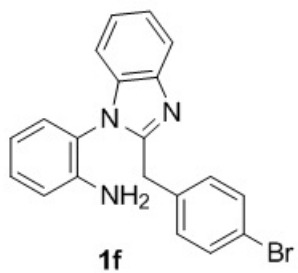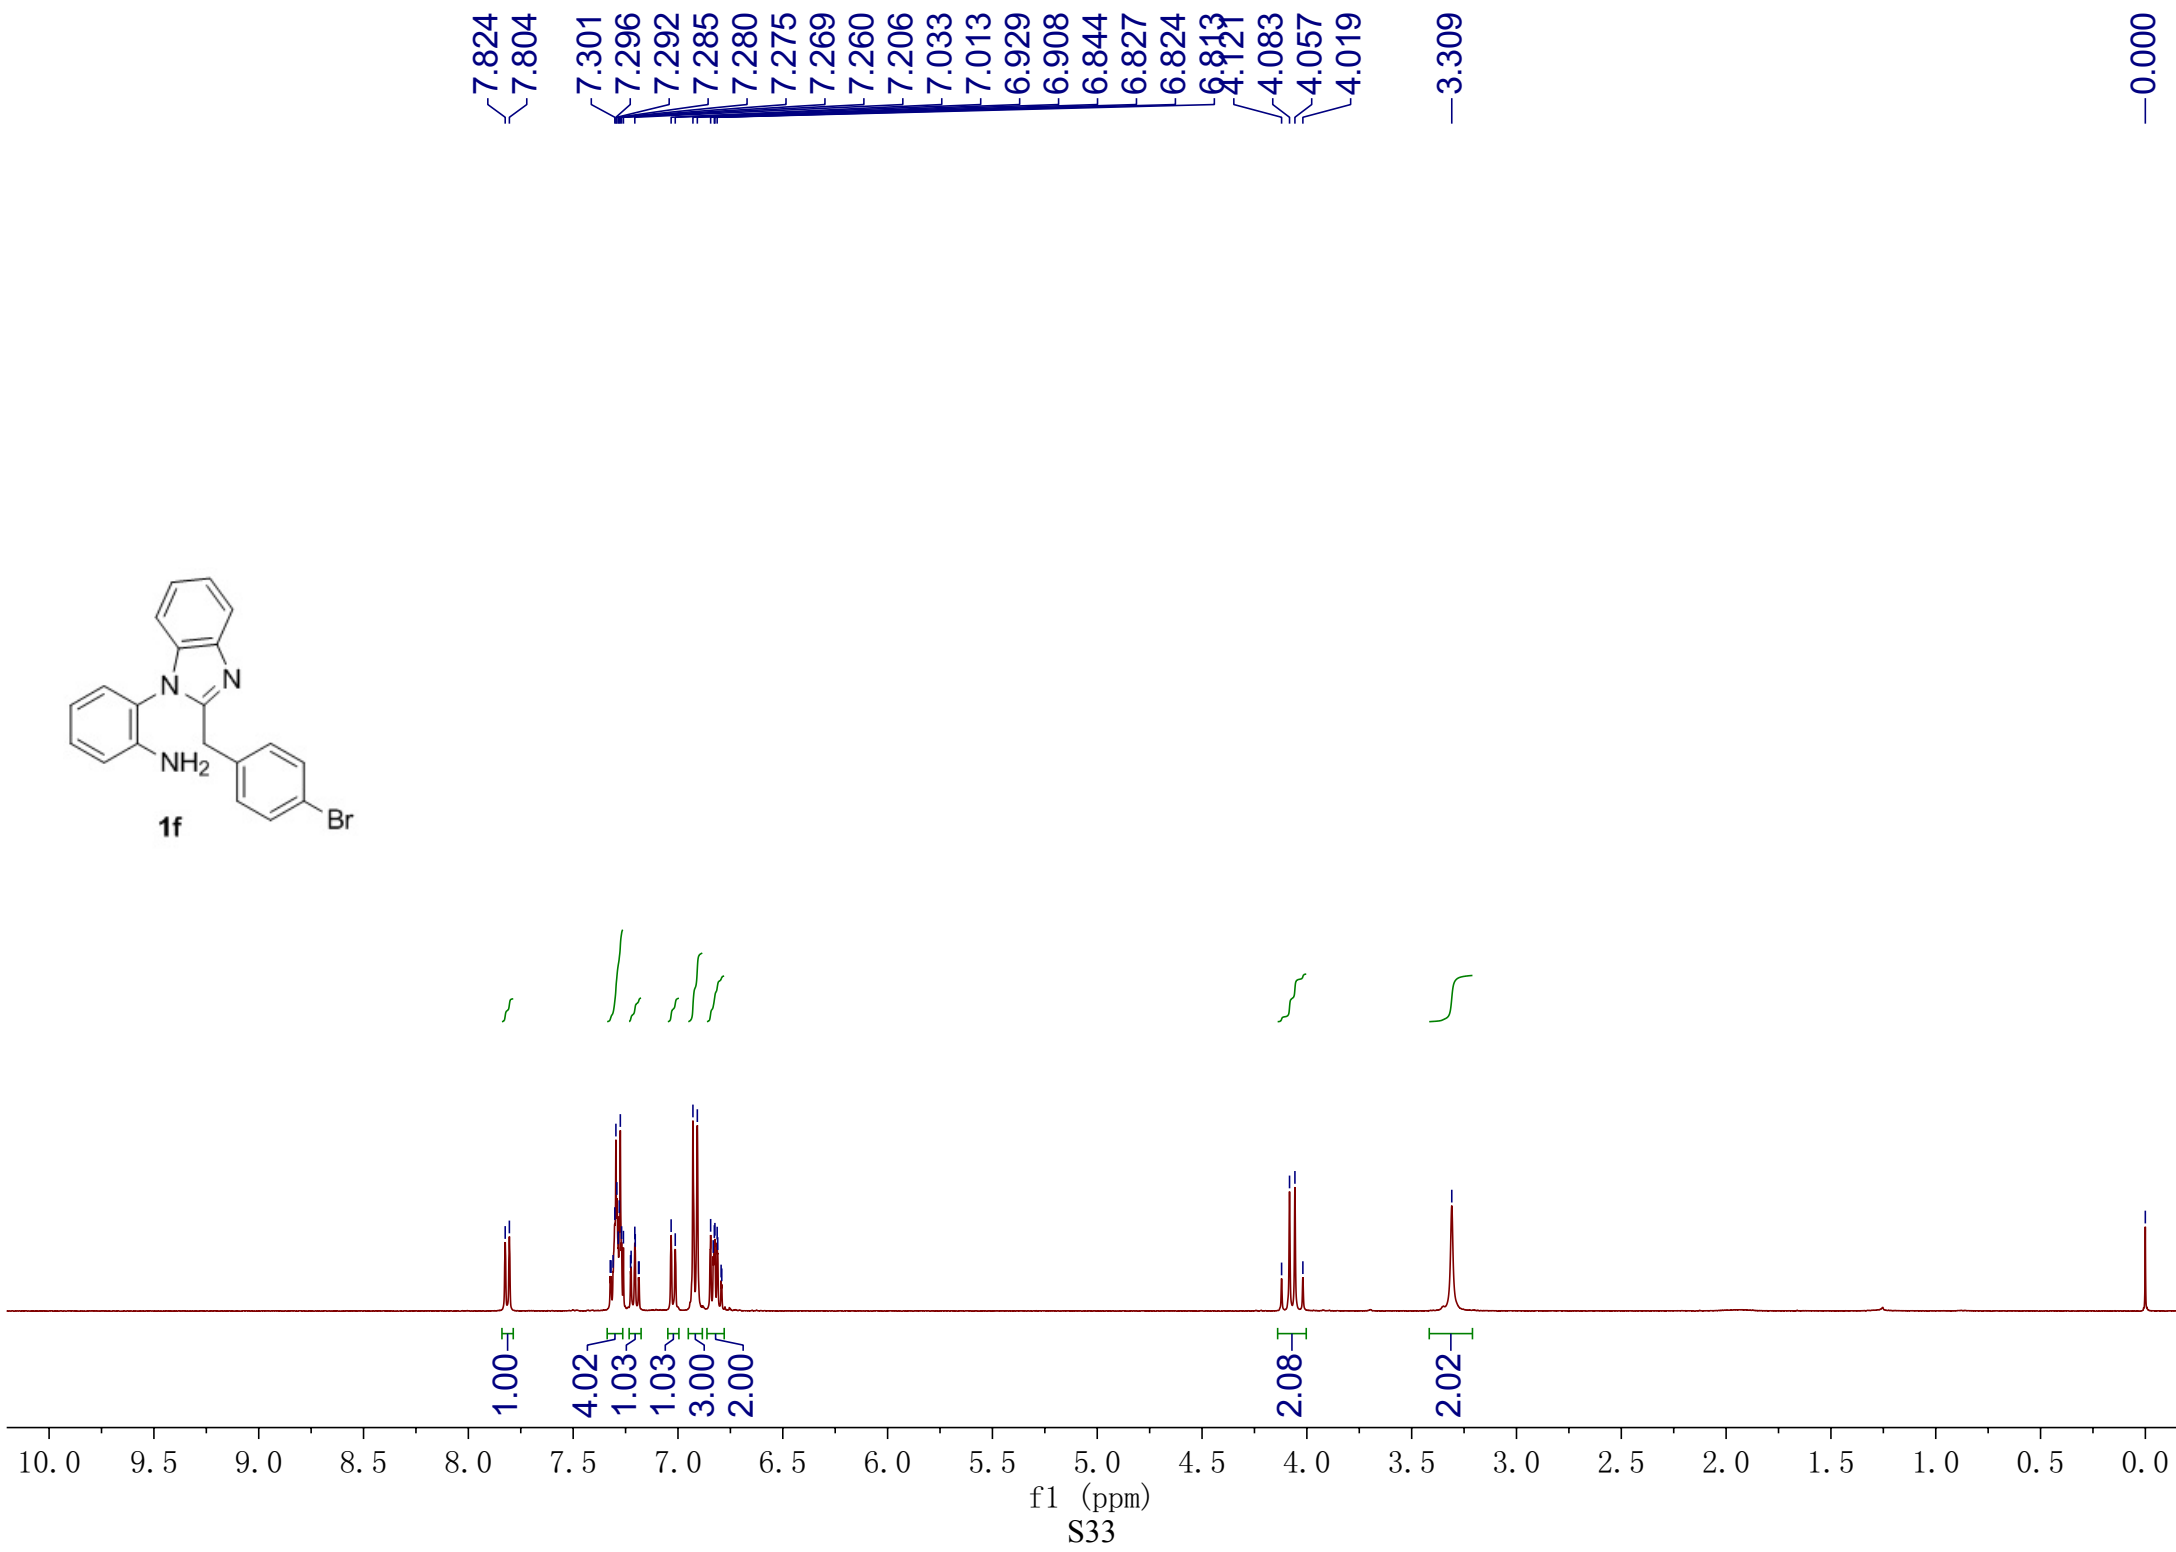

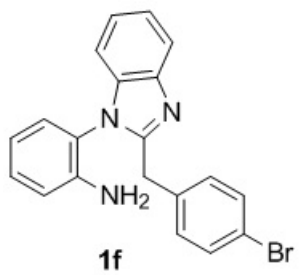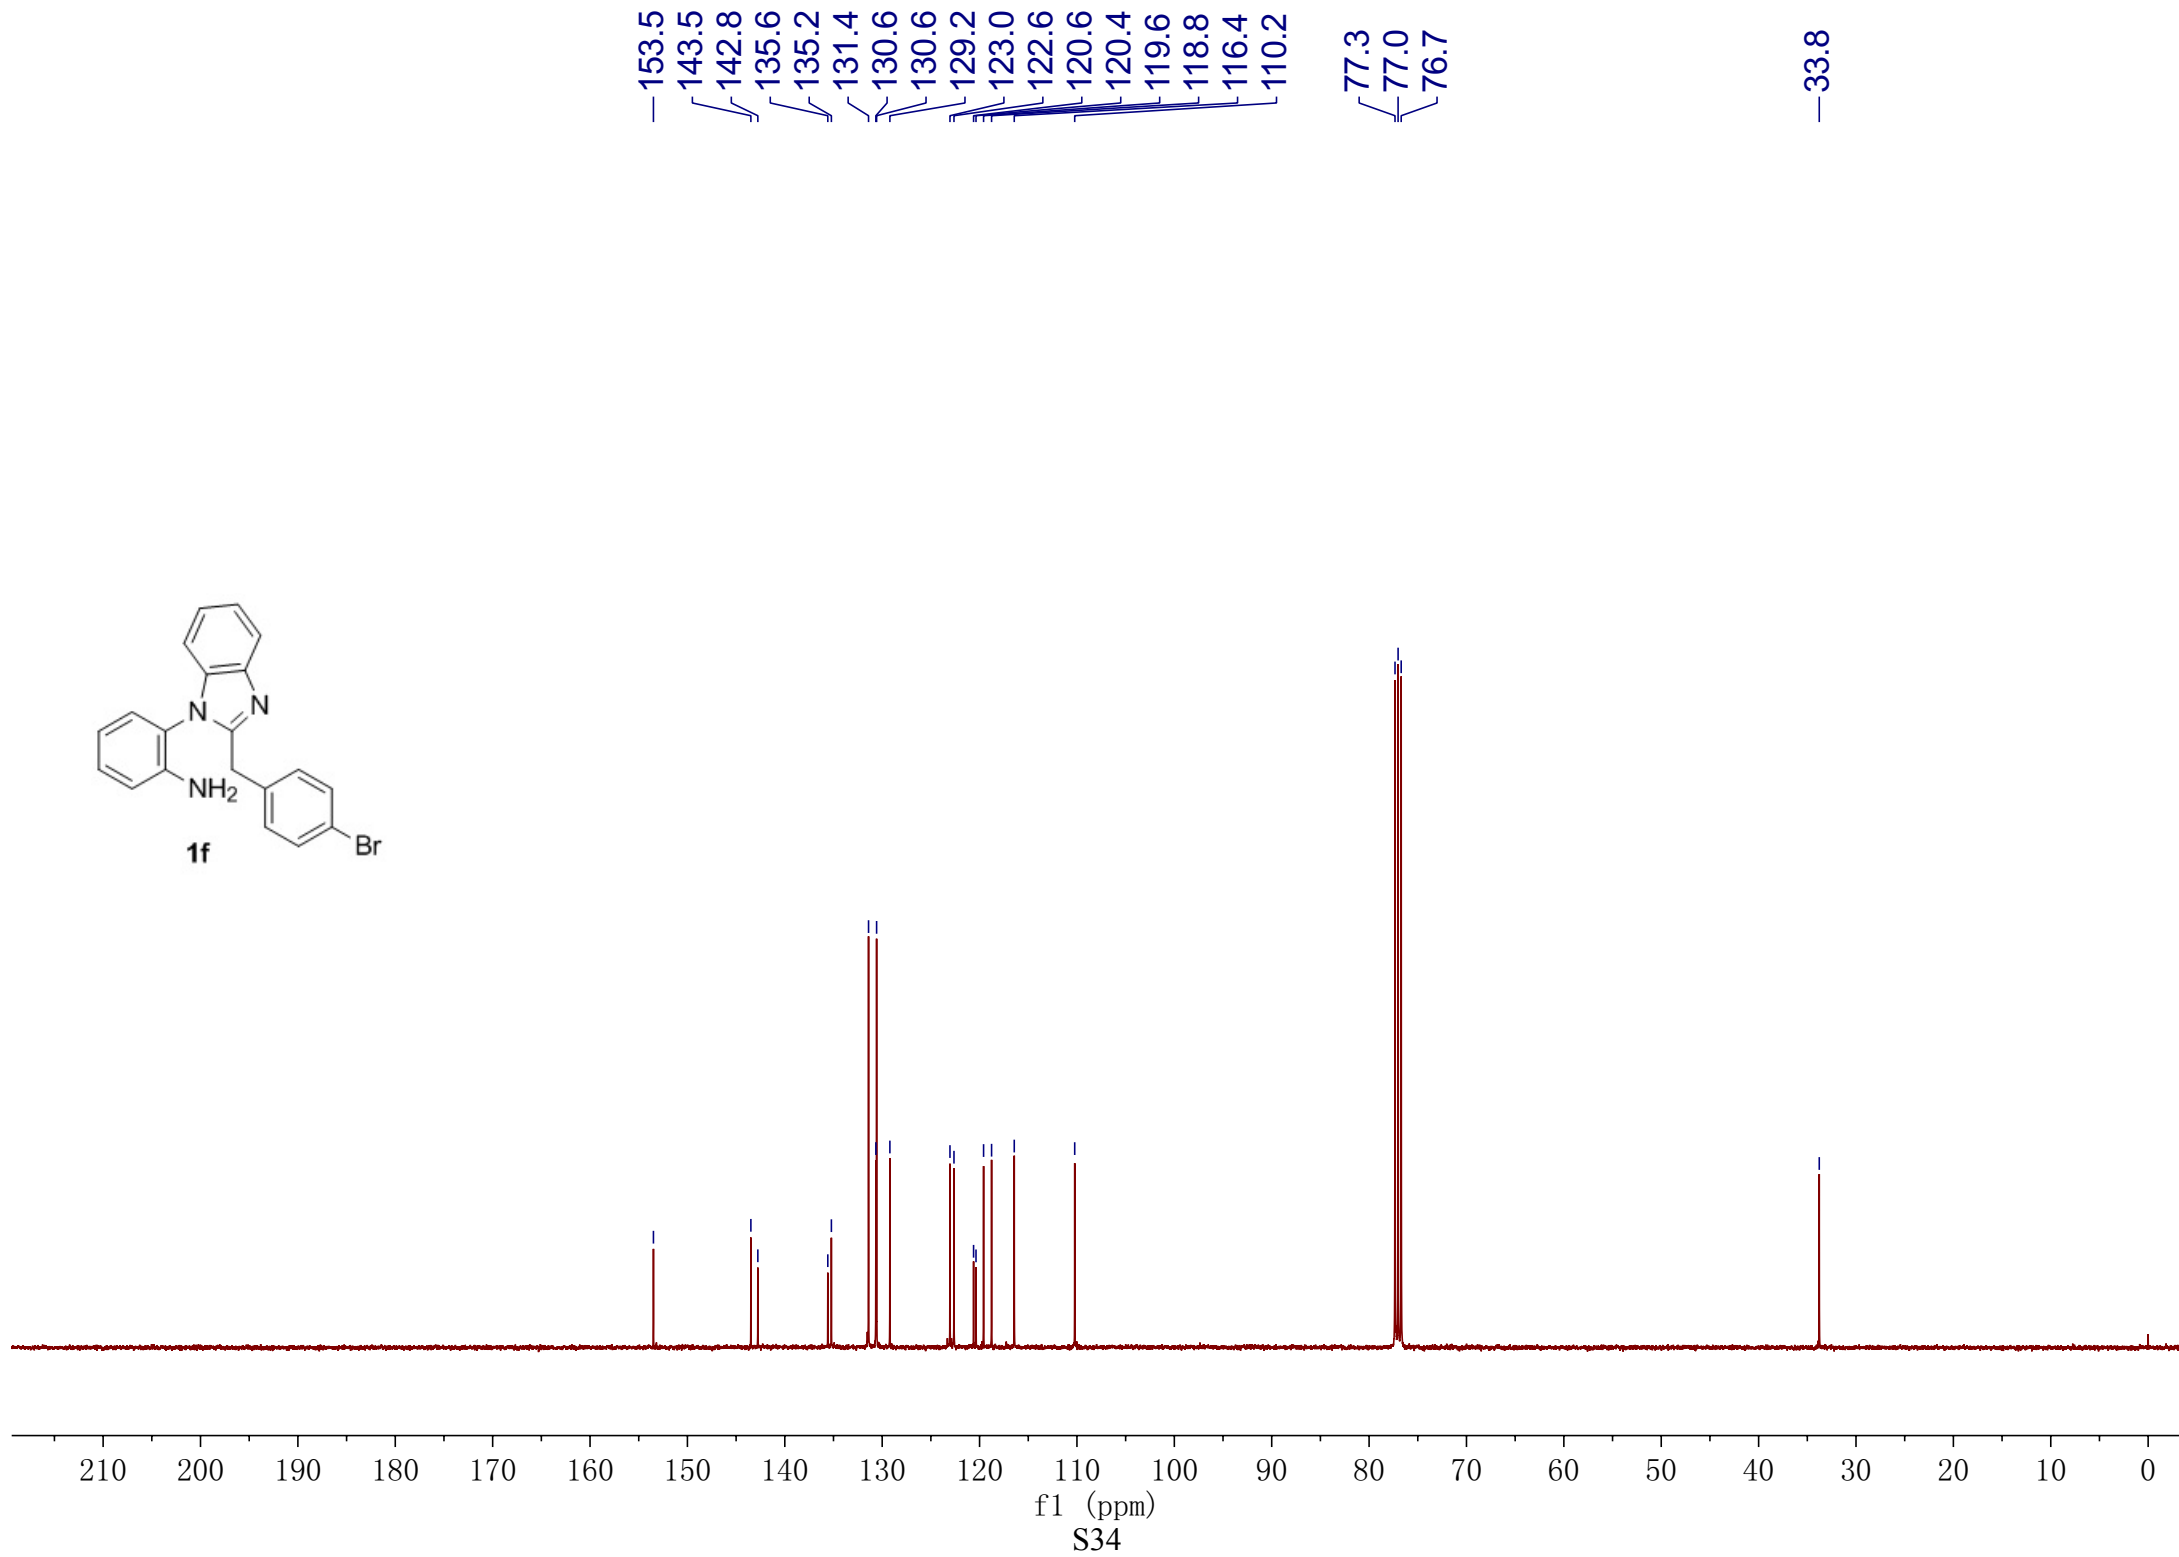

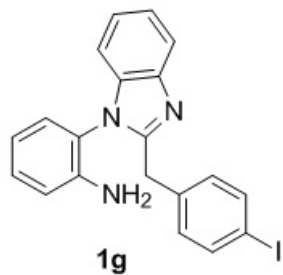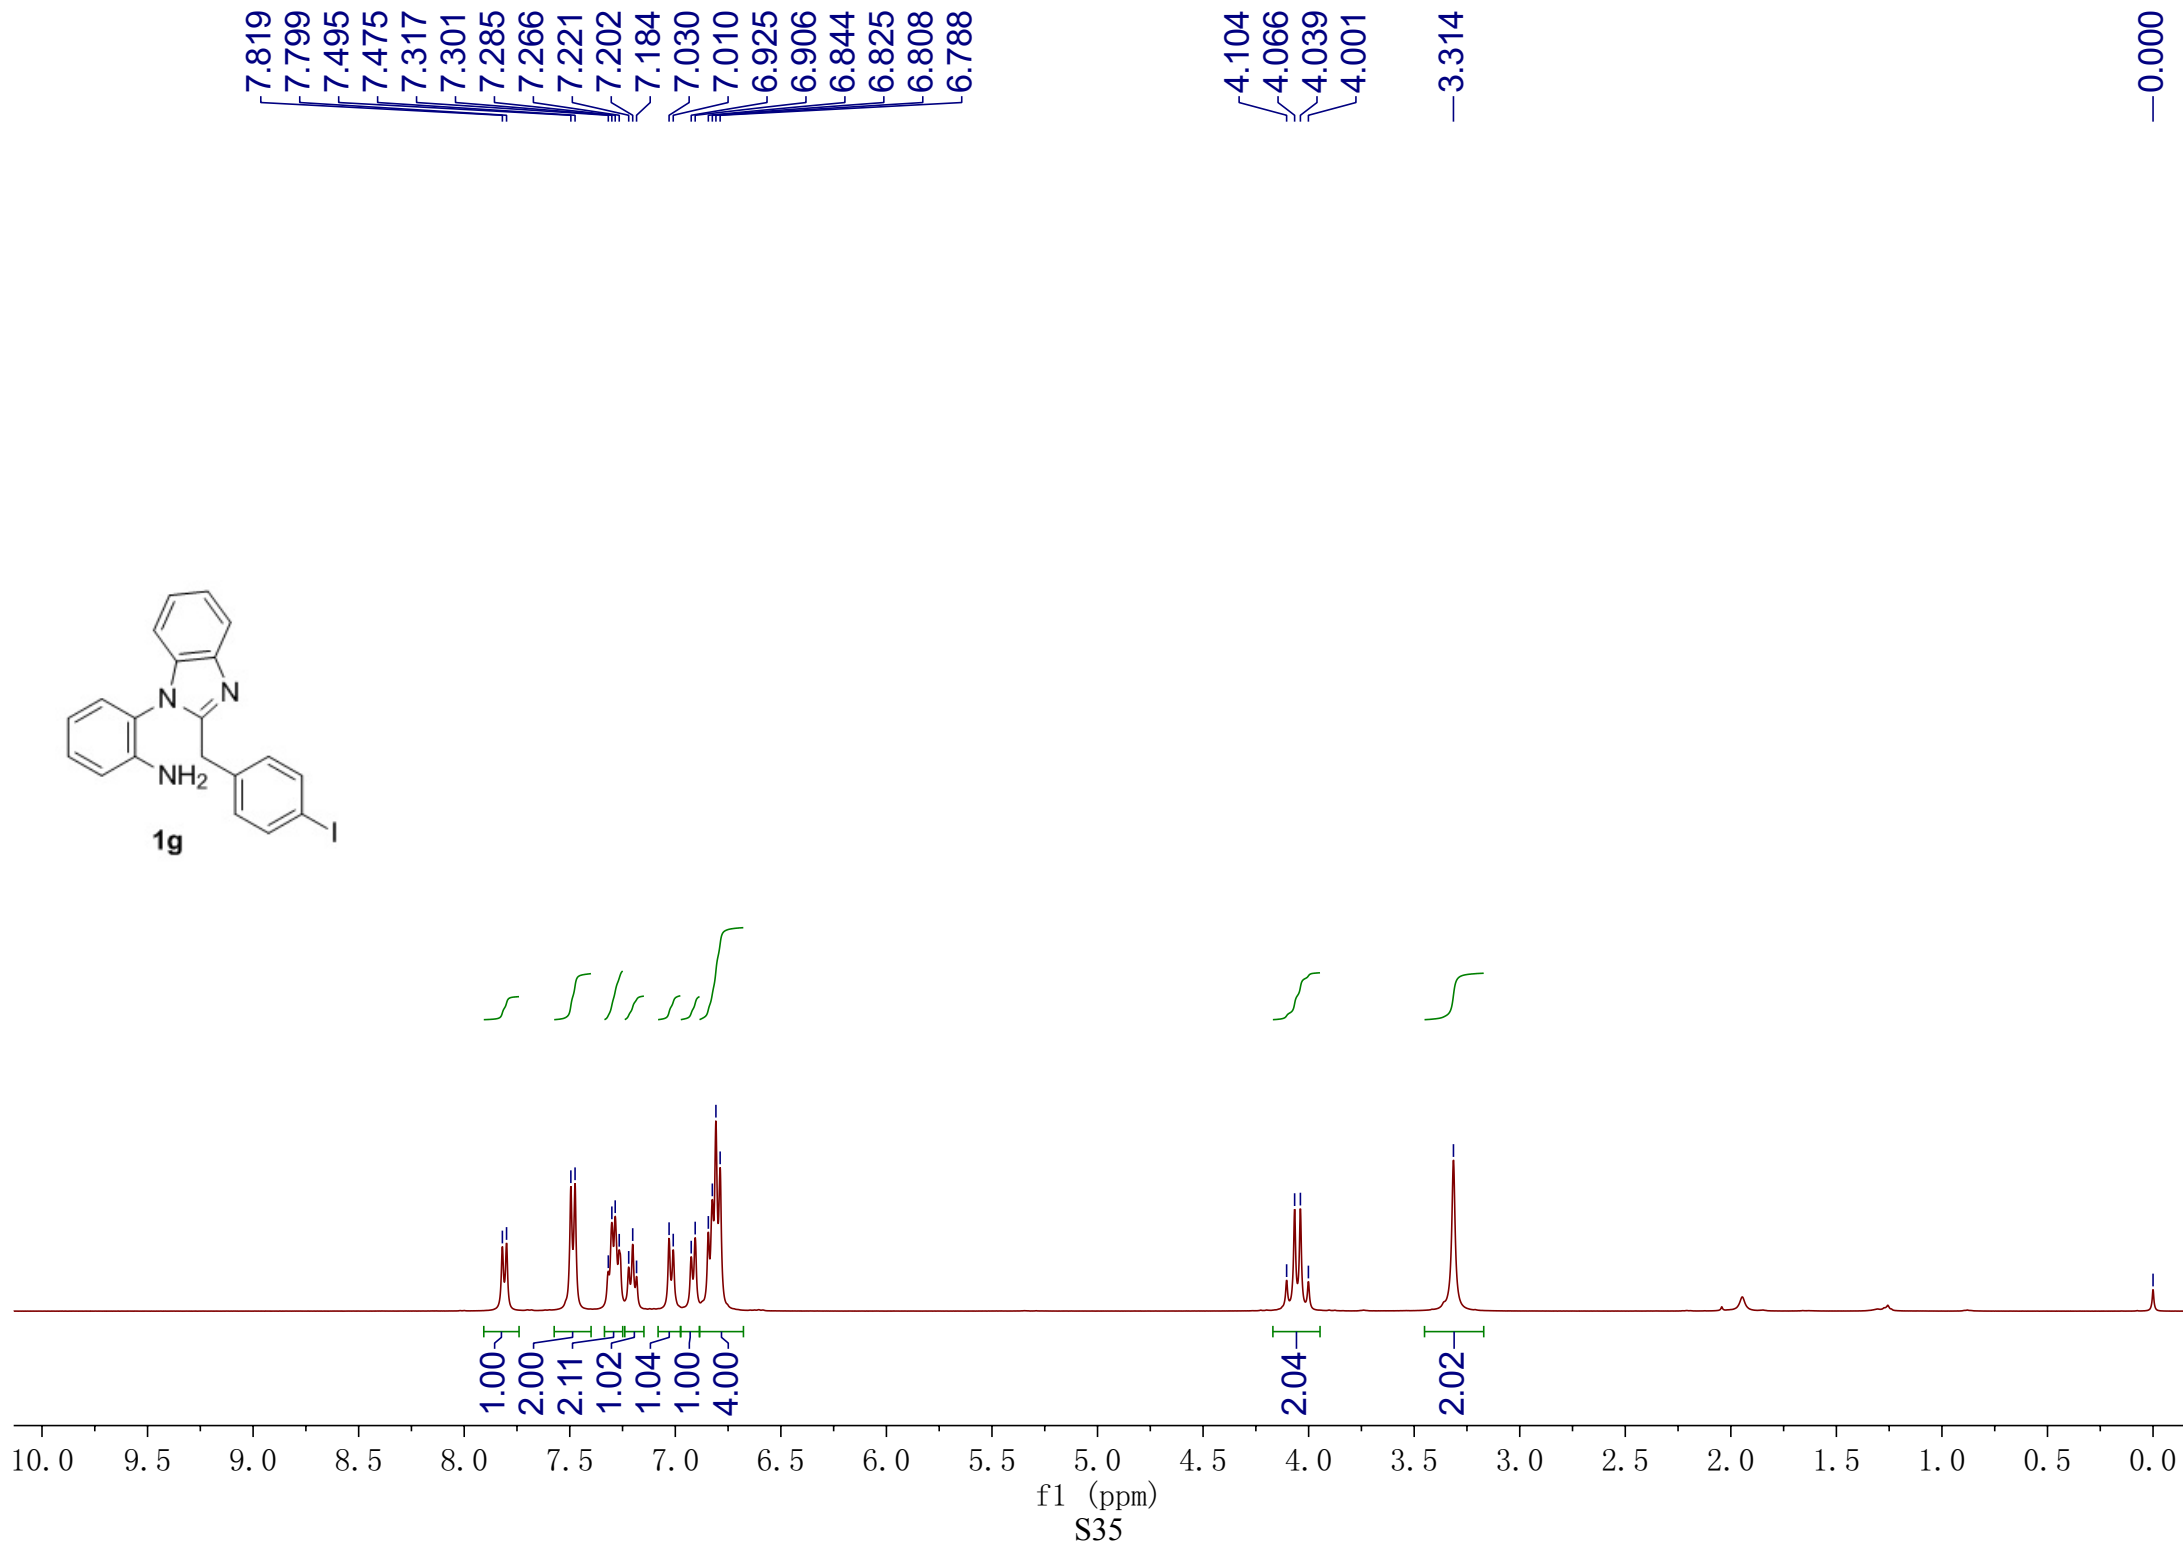

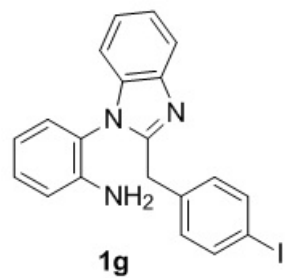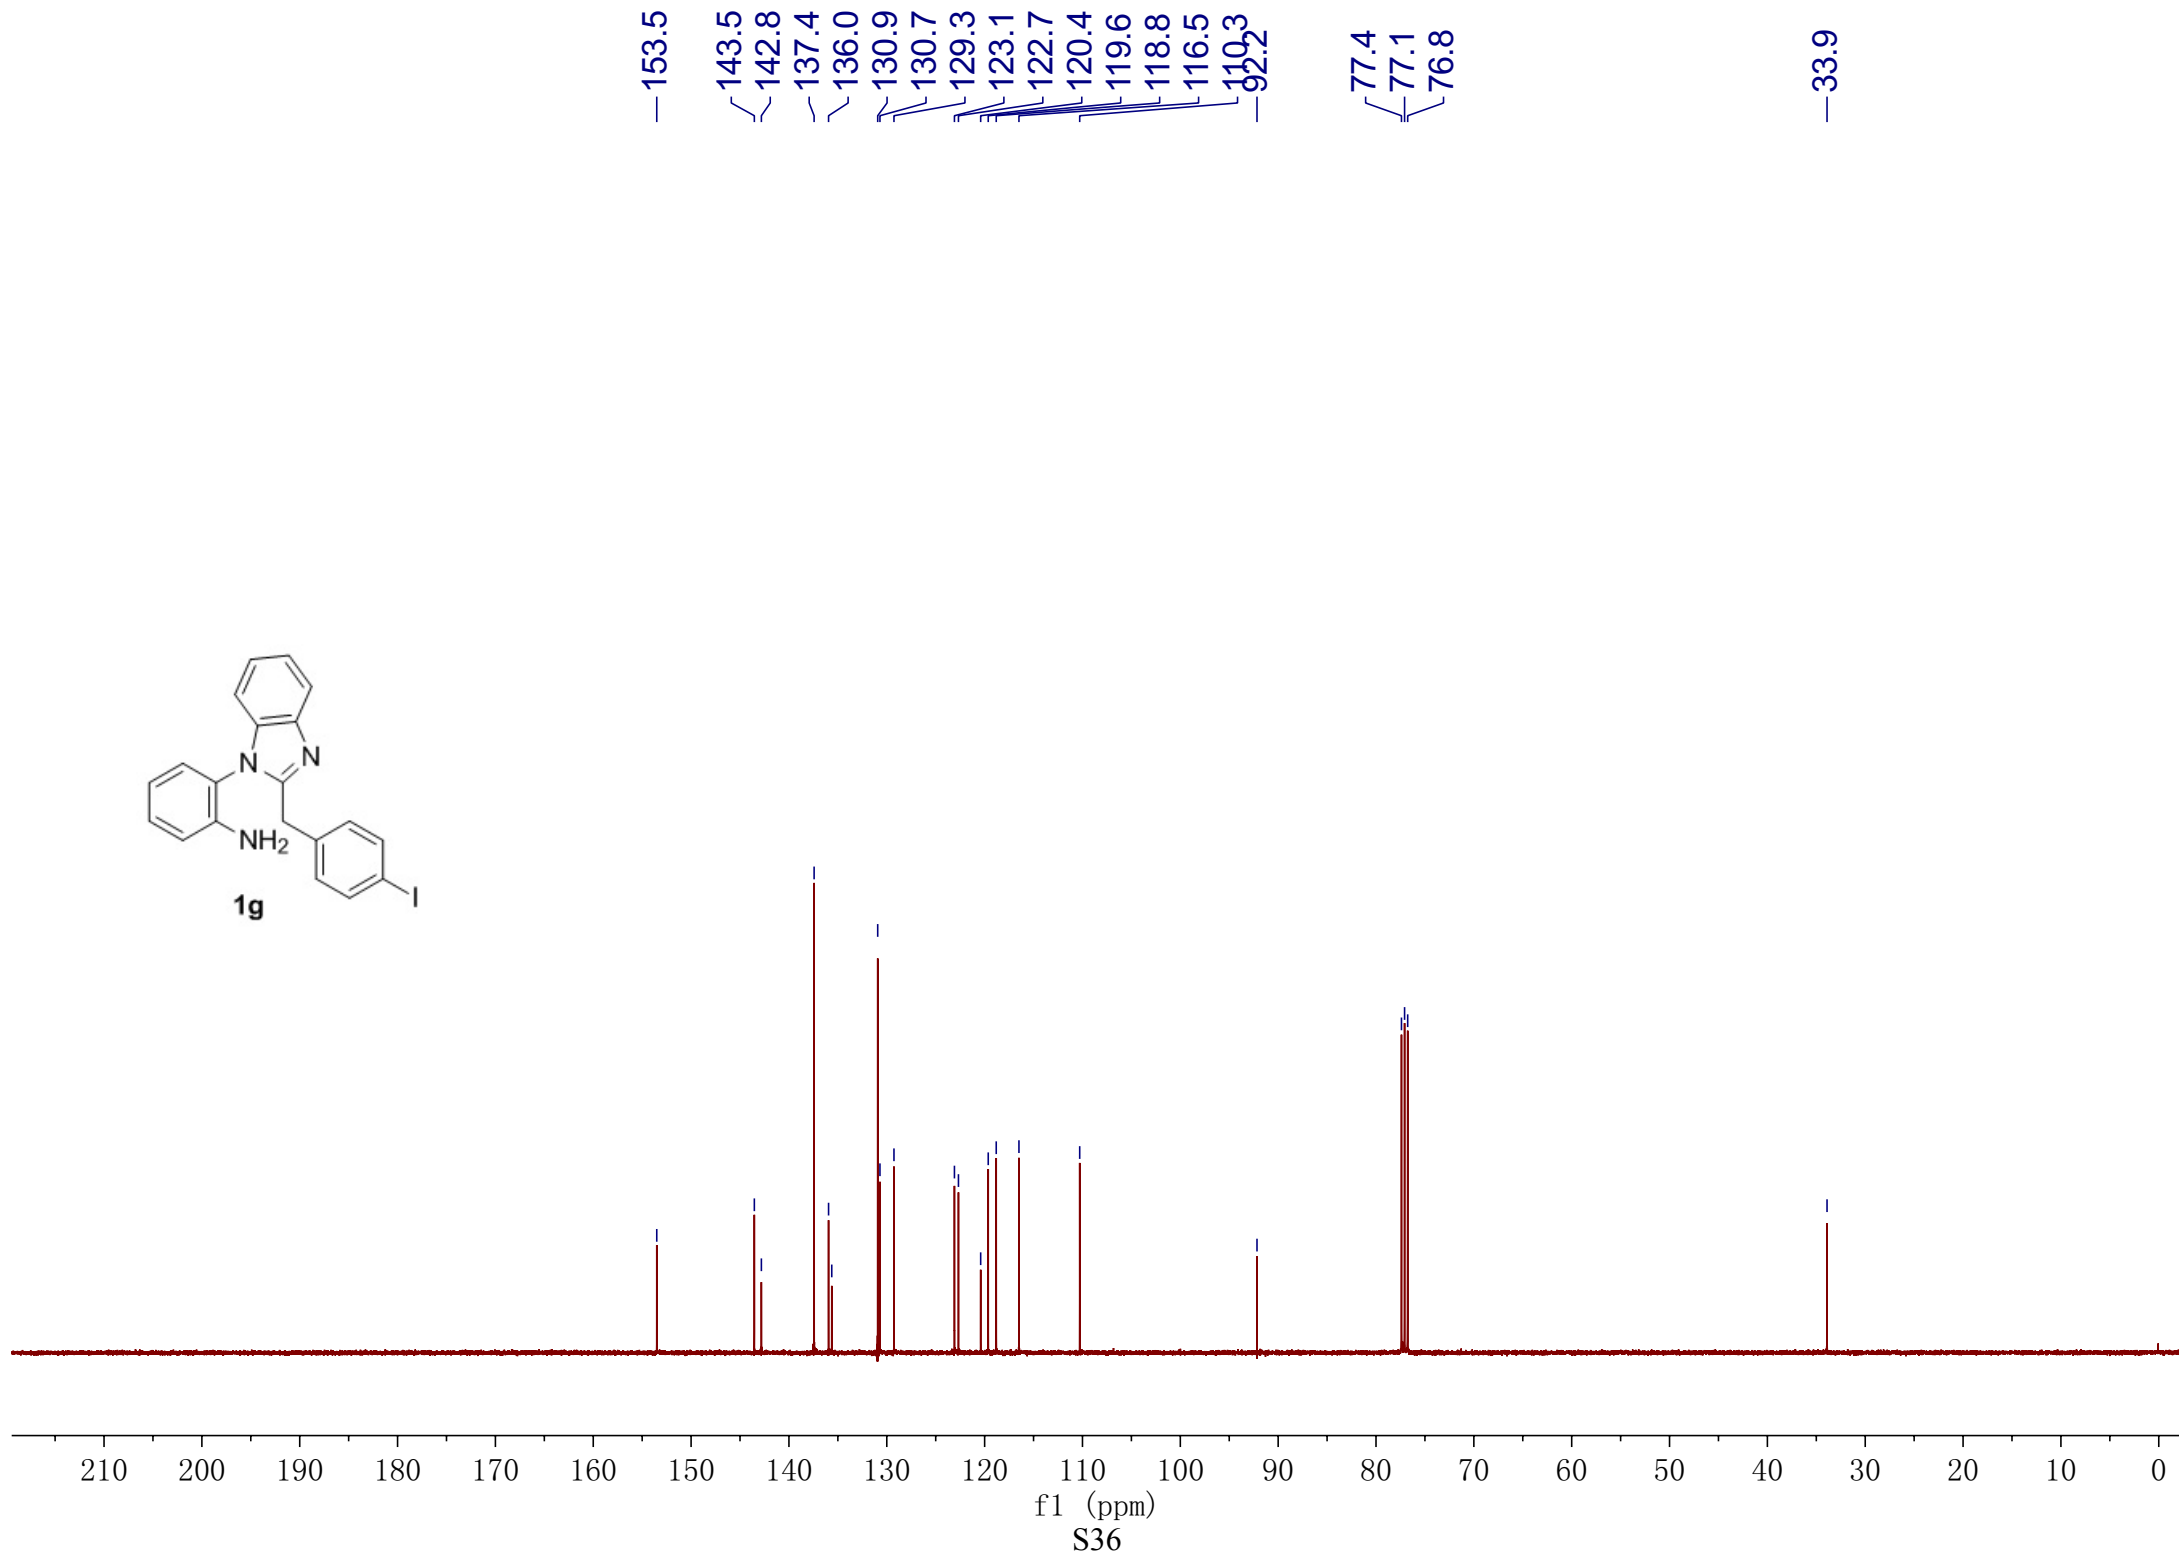



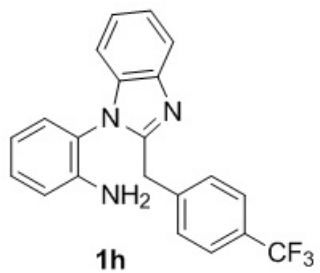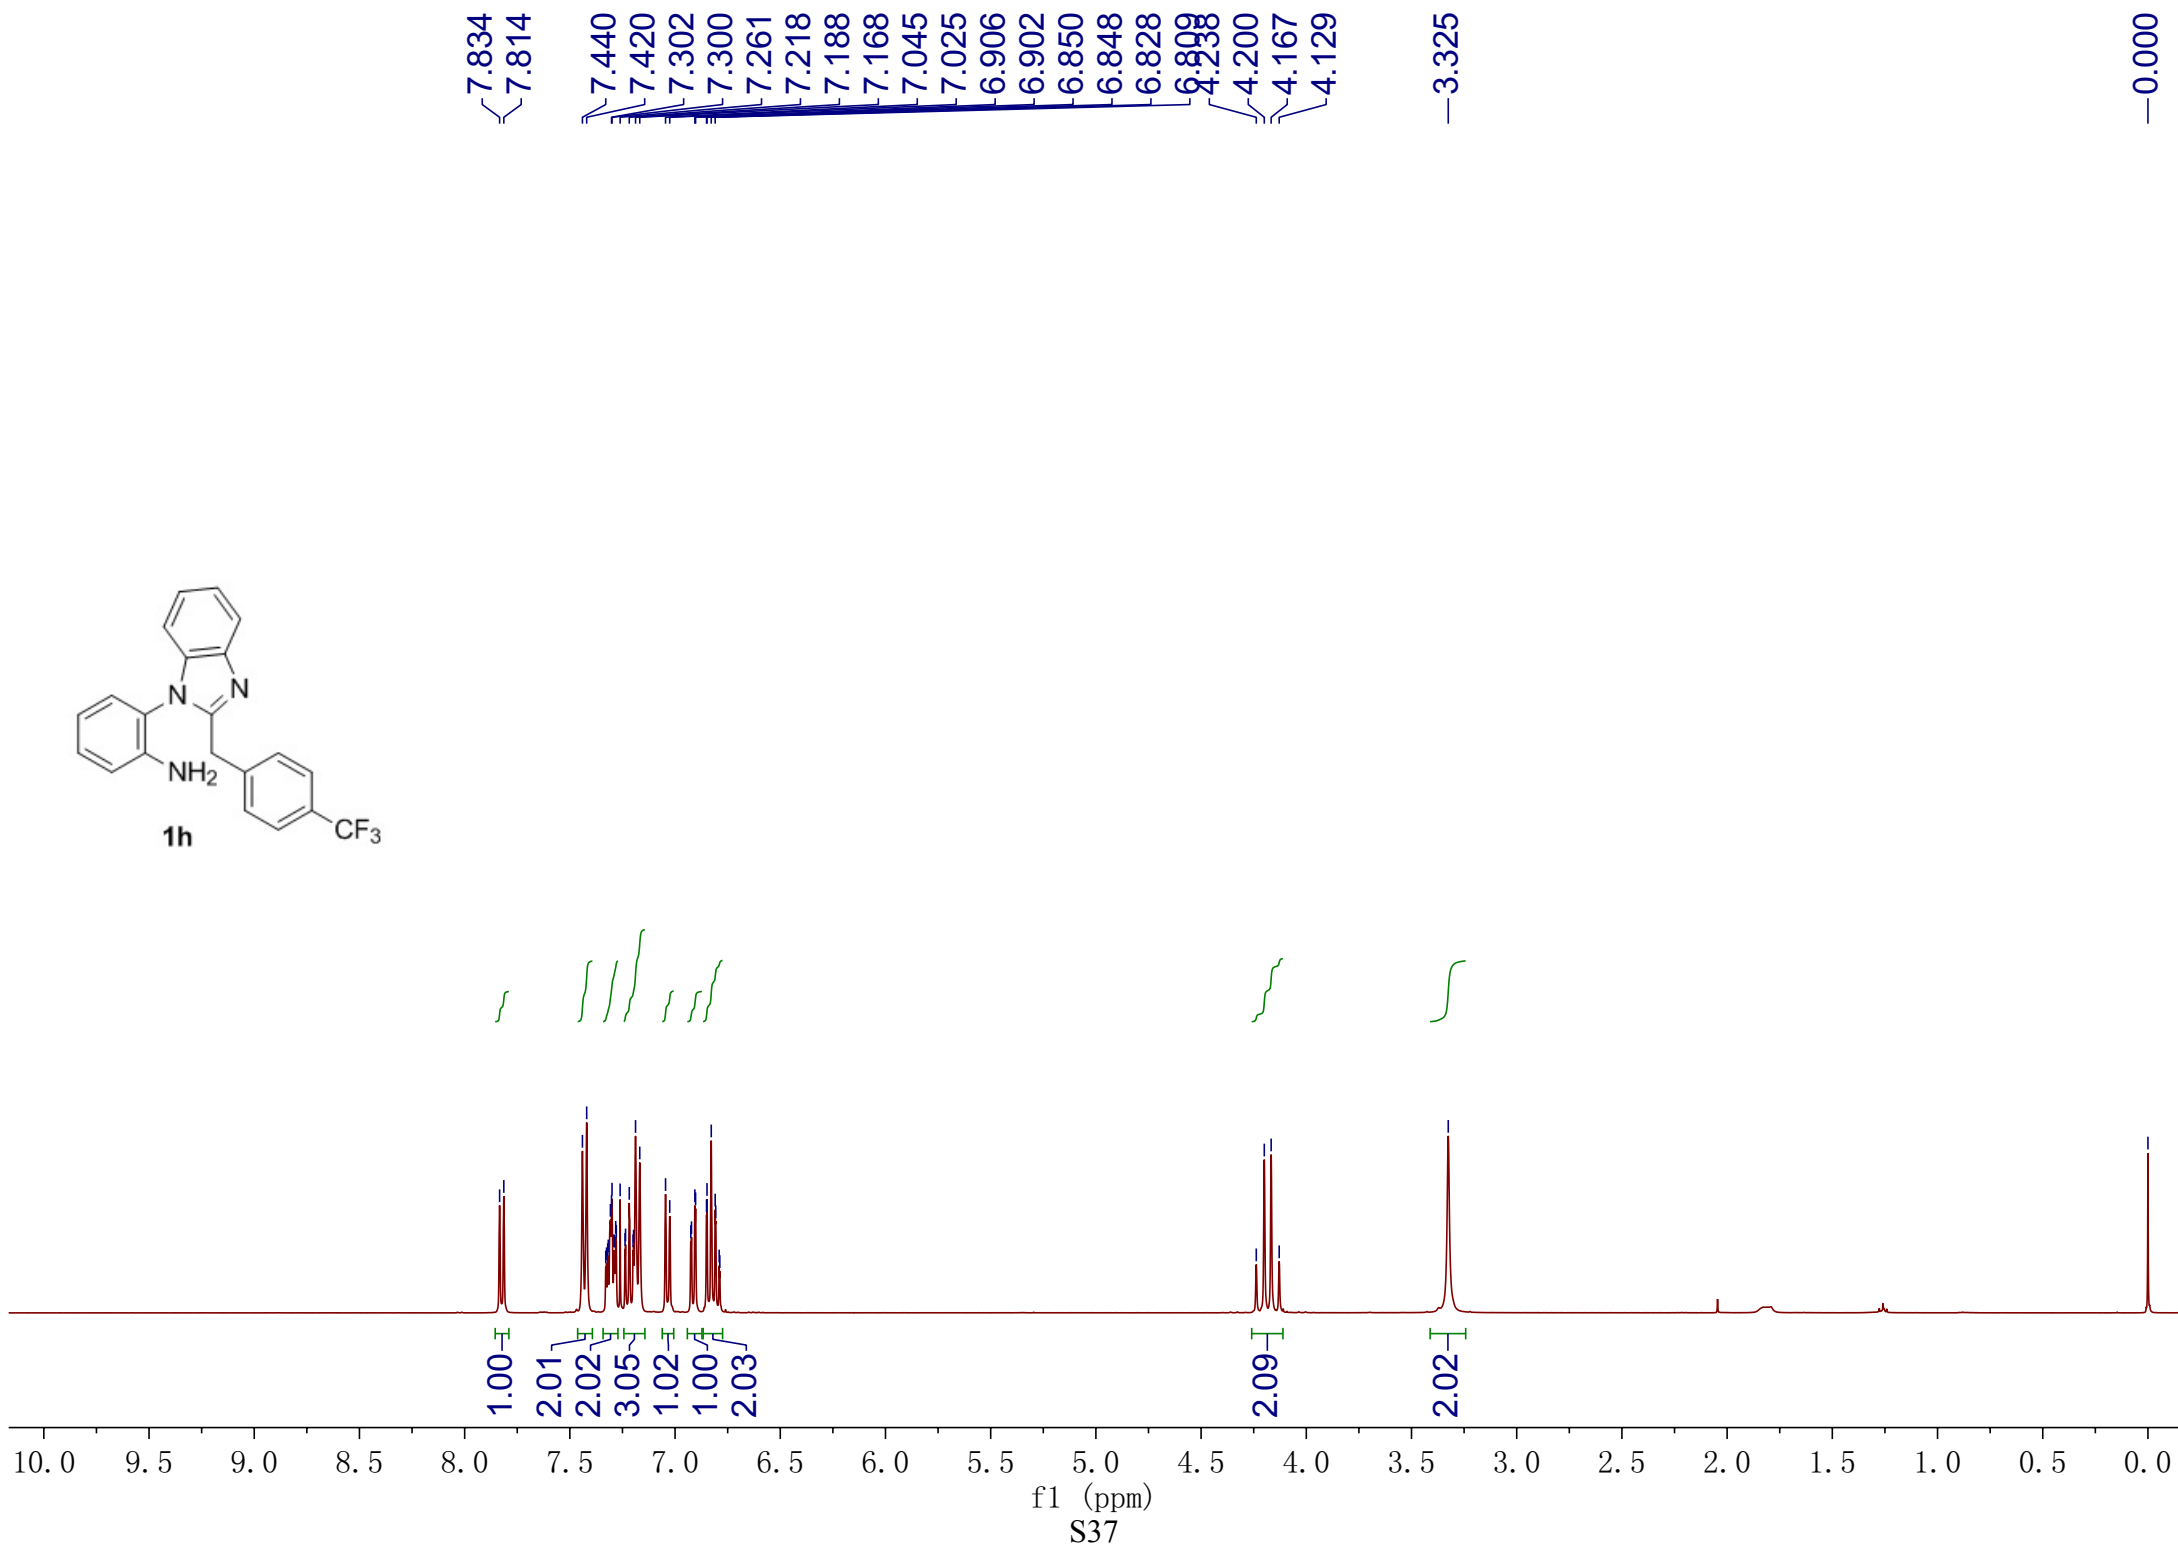

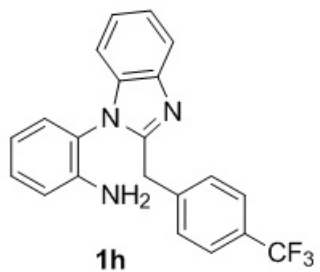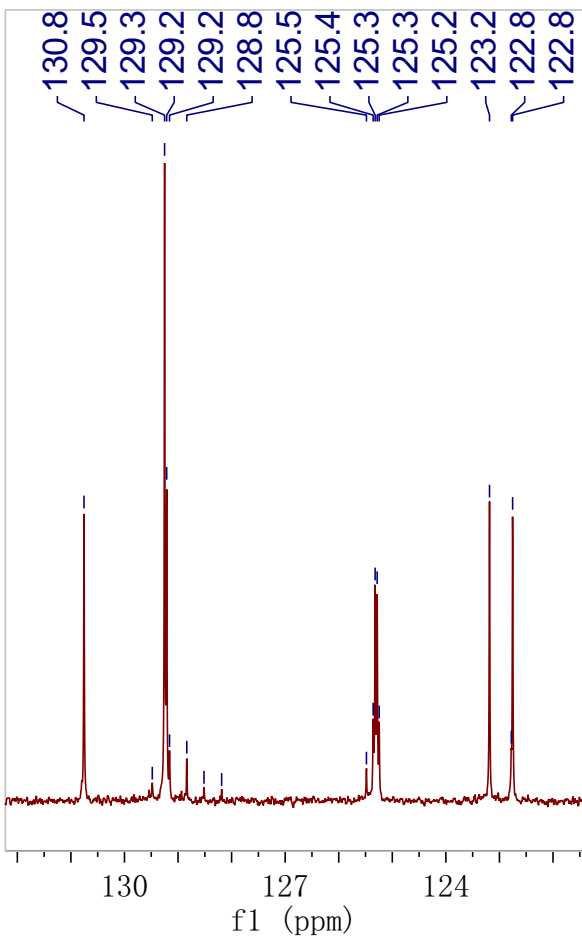

153.2  
143.5  
142.8  
135.6  
130.8  
129.3  
129.2  
125.4  
125.3  
125.3  
123.2  
122.8  
120.3  
119.7  
118.9  
116.5  
110.3  
77.4  
77.1  
76.7

34.2

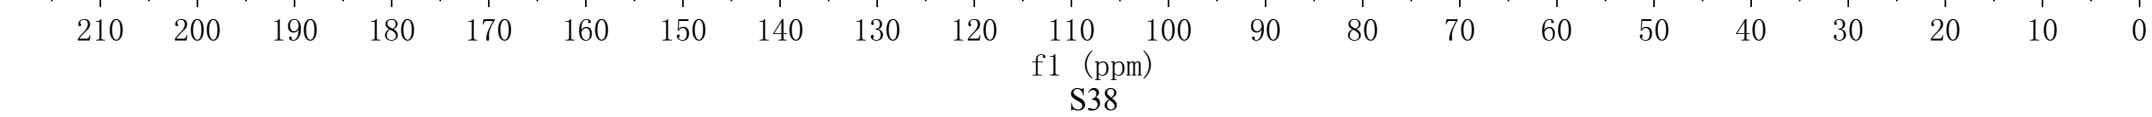

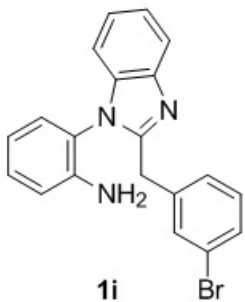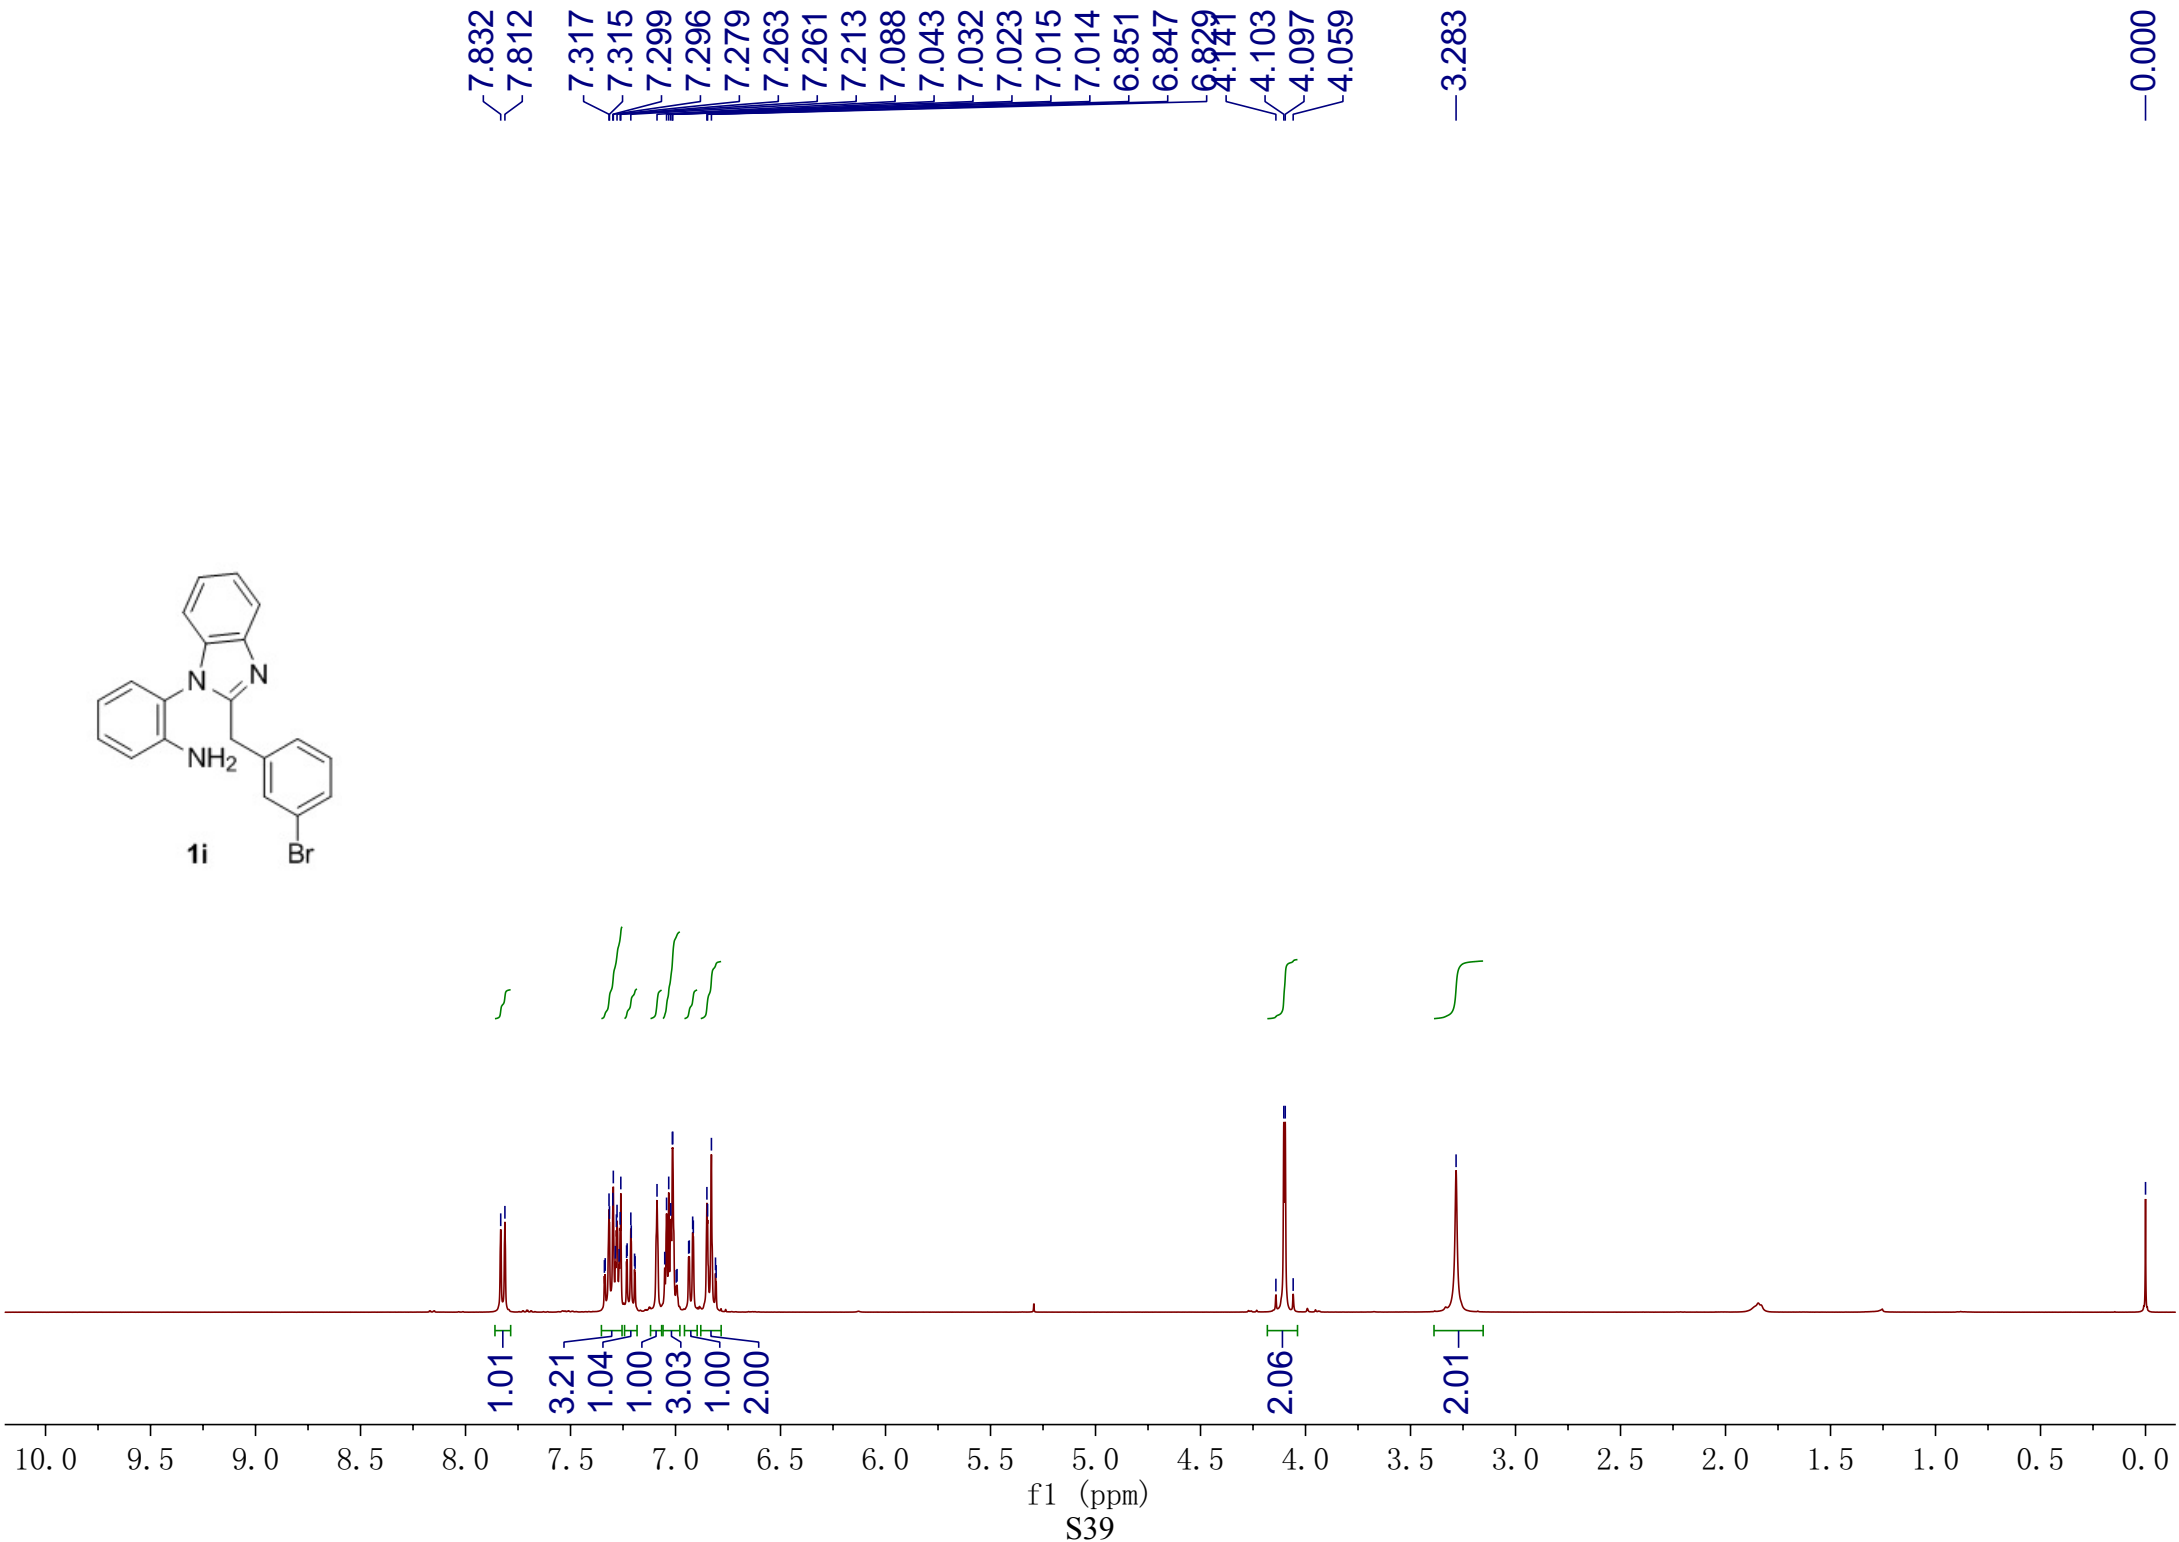

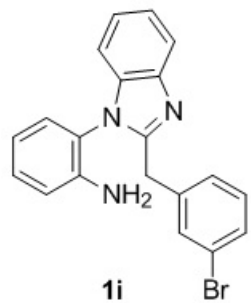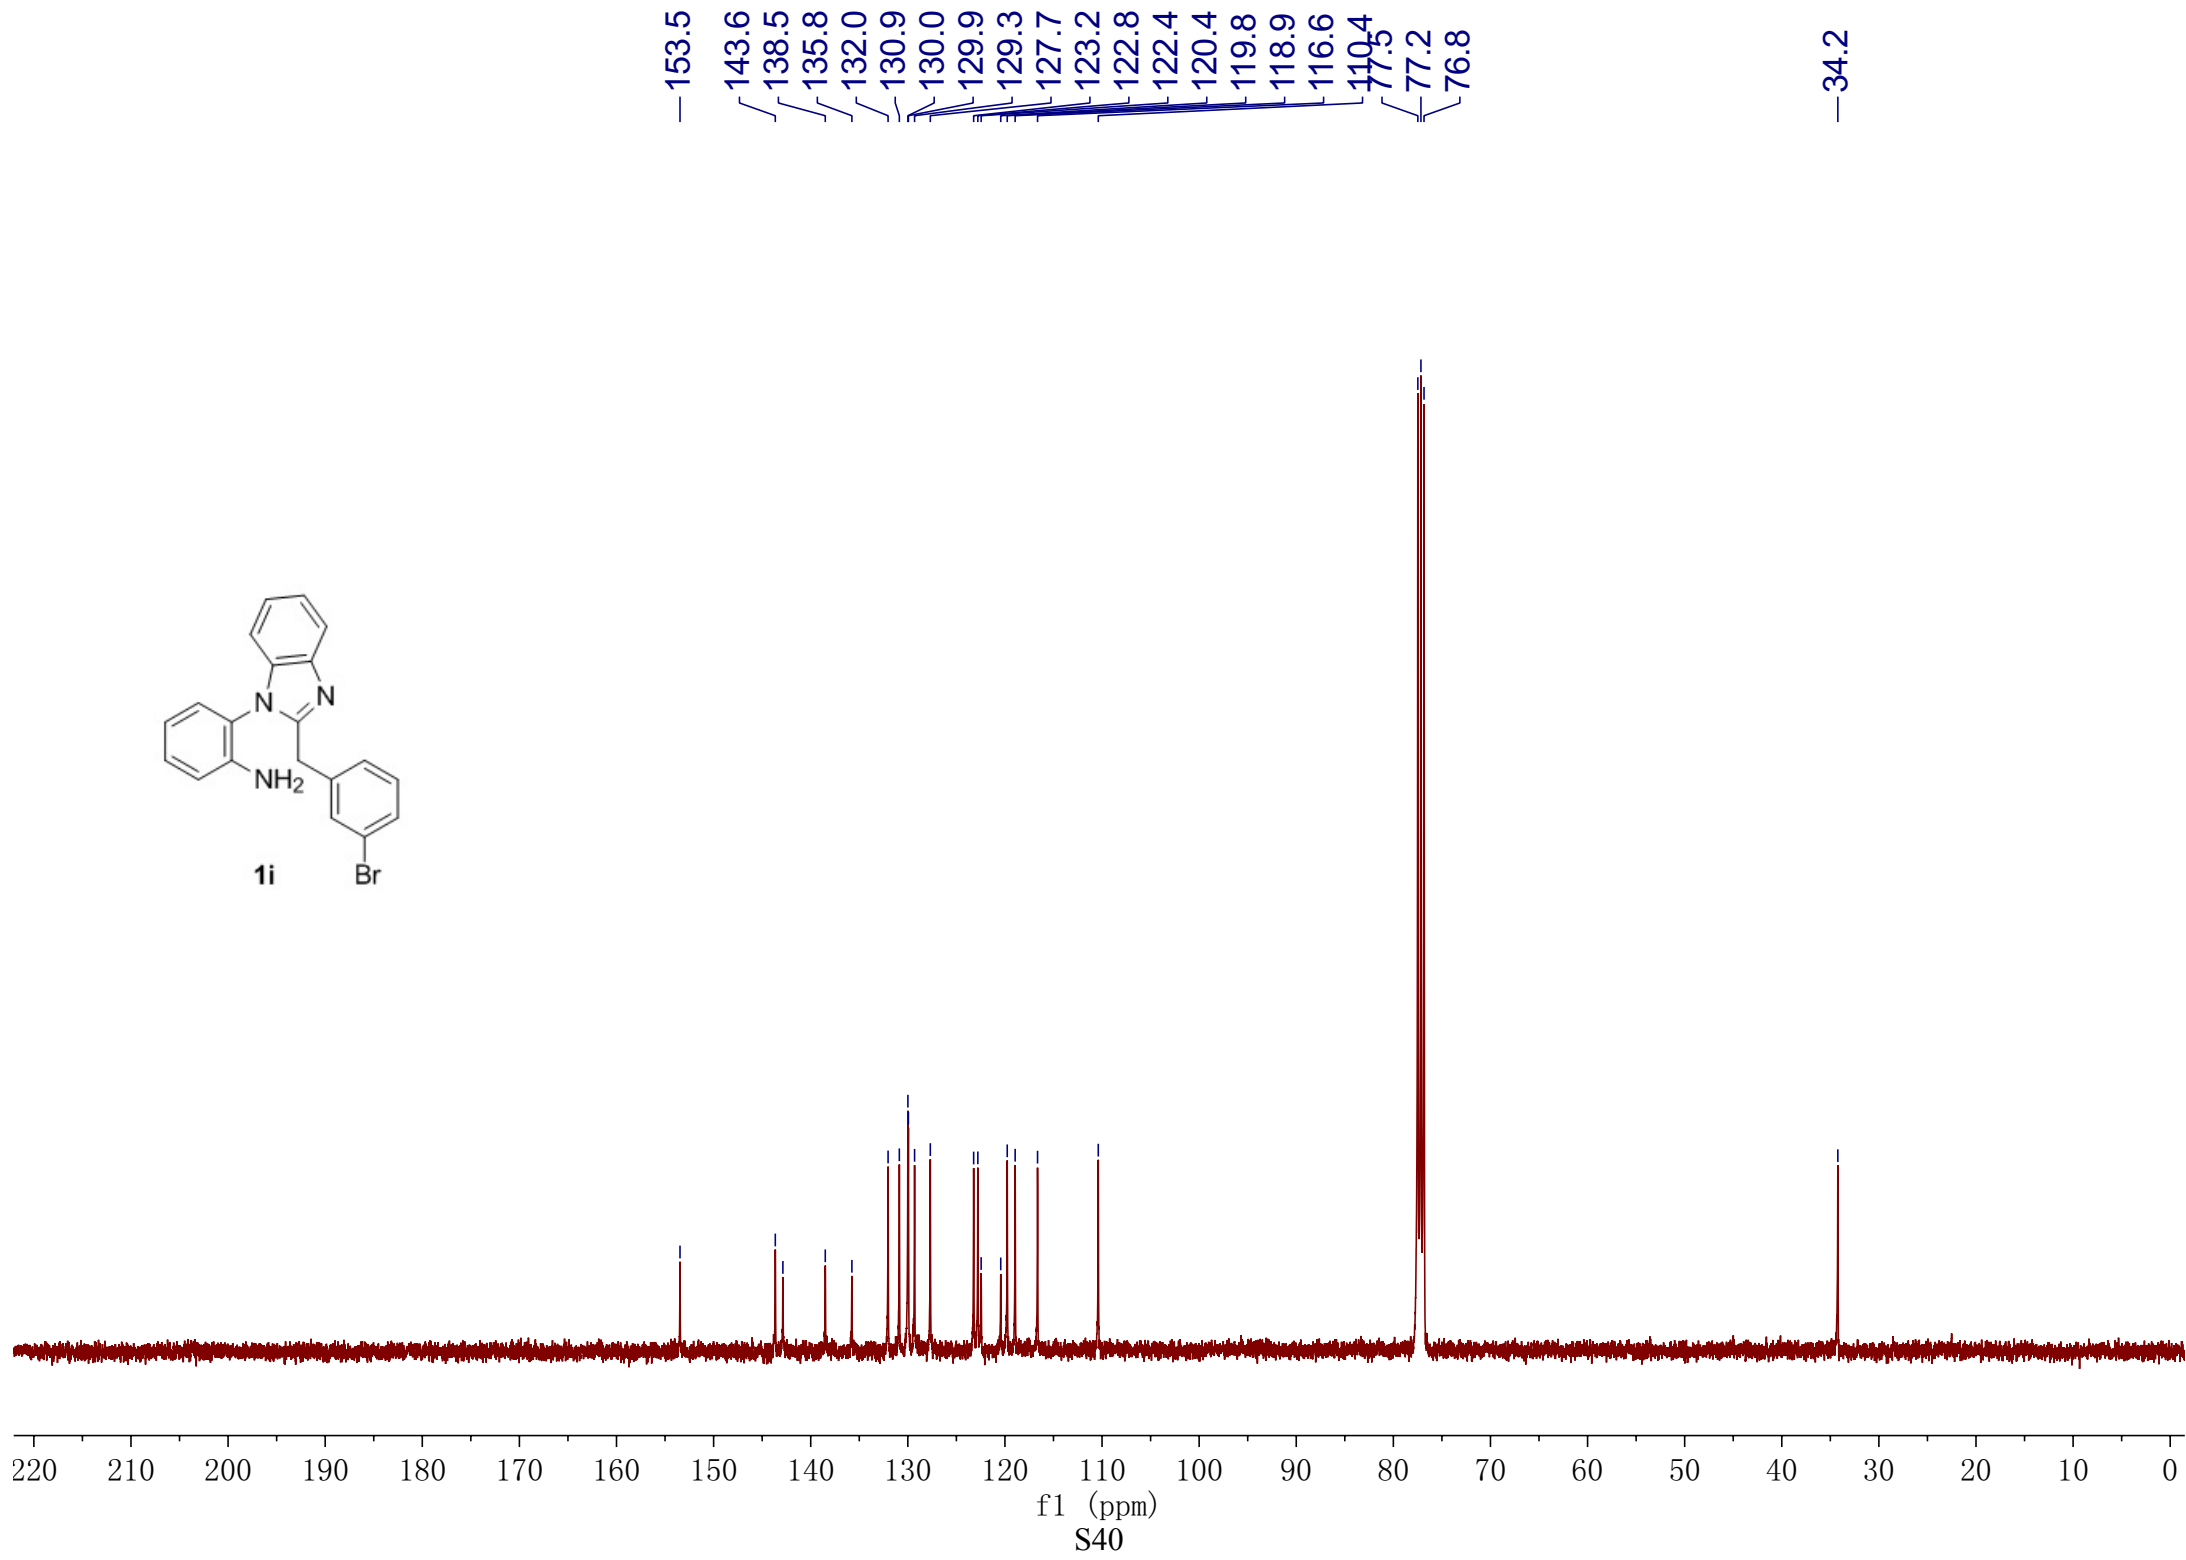

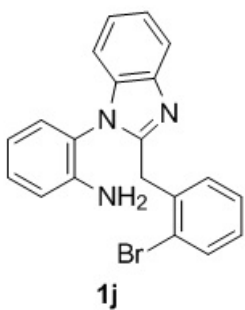

7.638  
7.620  
7.570  
7.551  
7.316  
7.308  
7.250  
7.230  
7.206  
7.189  
7.172  
7.156  
7.024  
7.005  
6.979  
6.960  
6.948  
6.927  
6.674  
6.656  
6.637  
—5.053

4.175  
4.134  
4.106  
4.065

—3.357

—2.503

—0.000

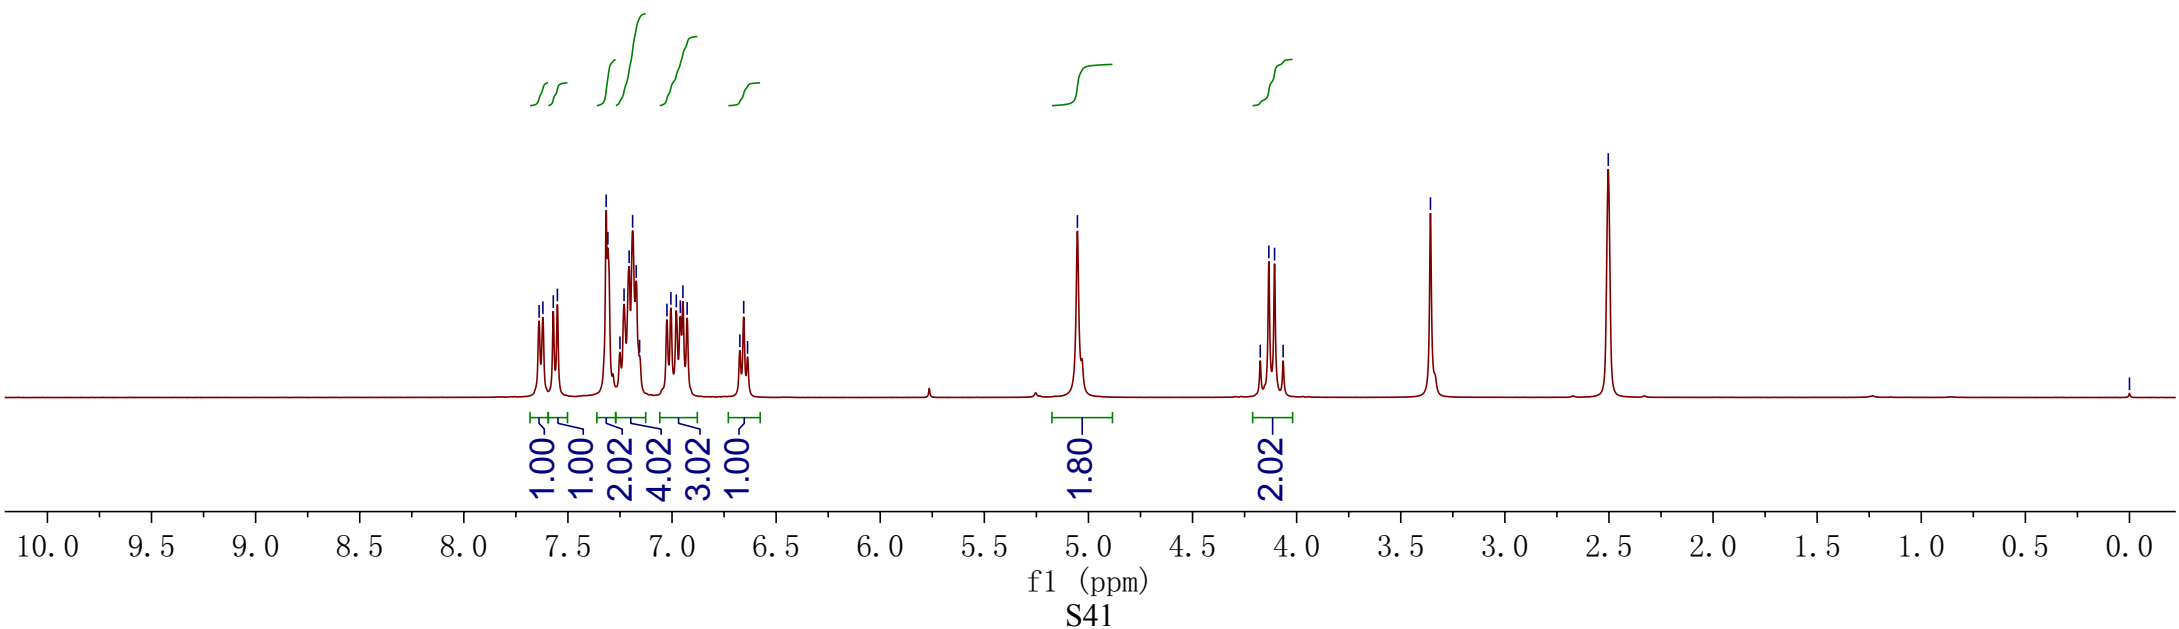

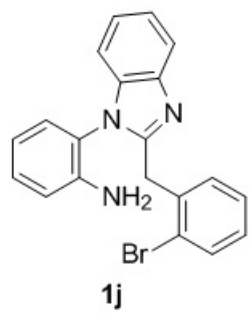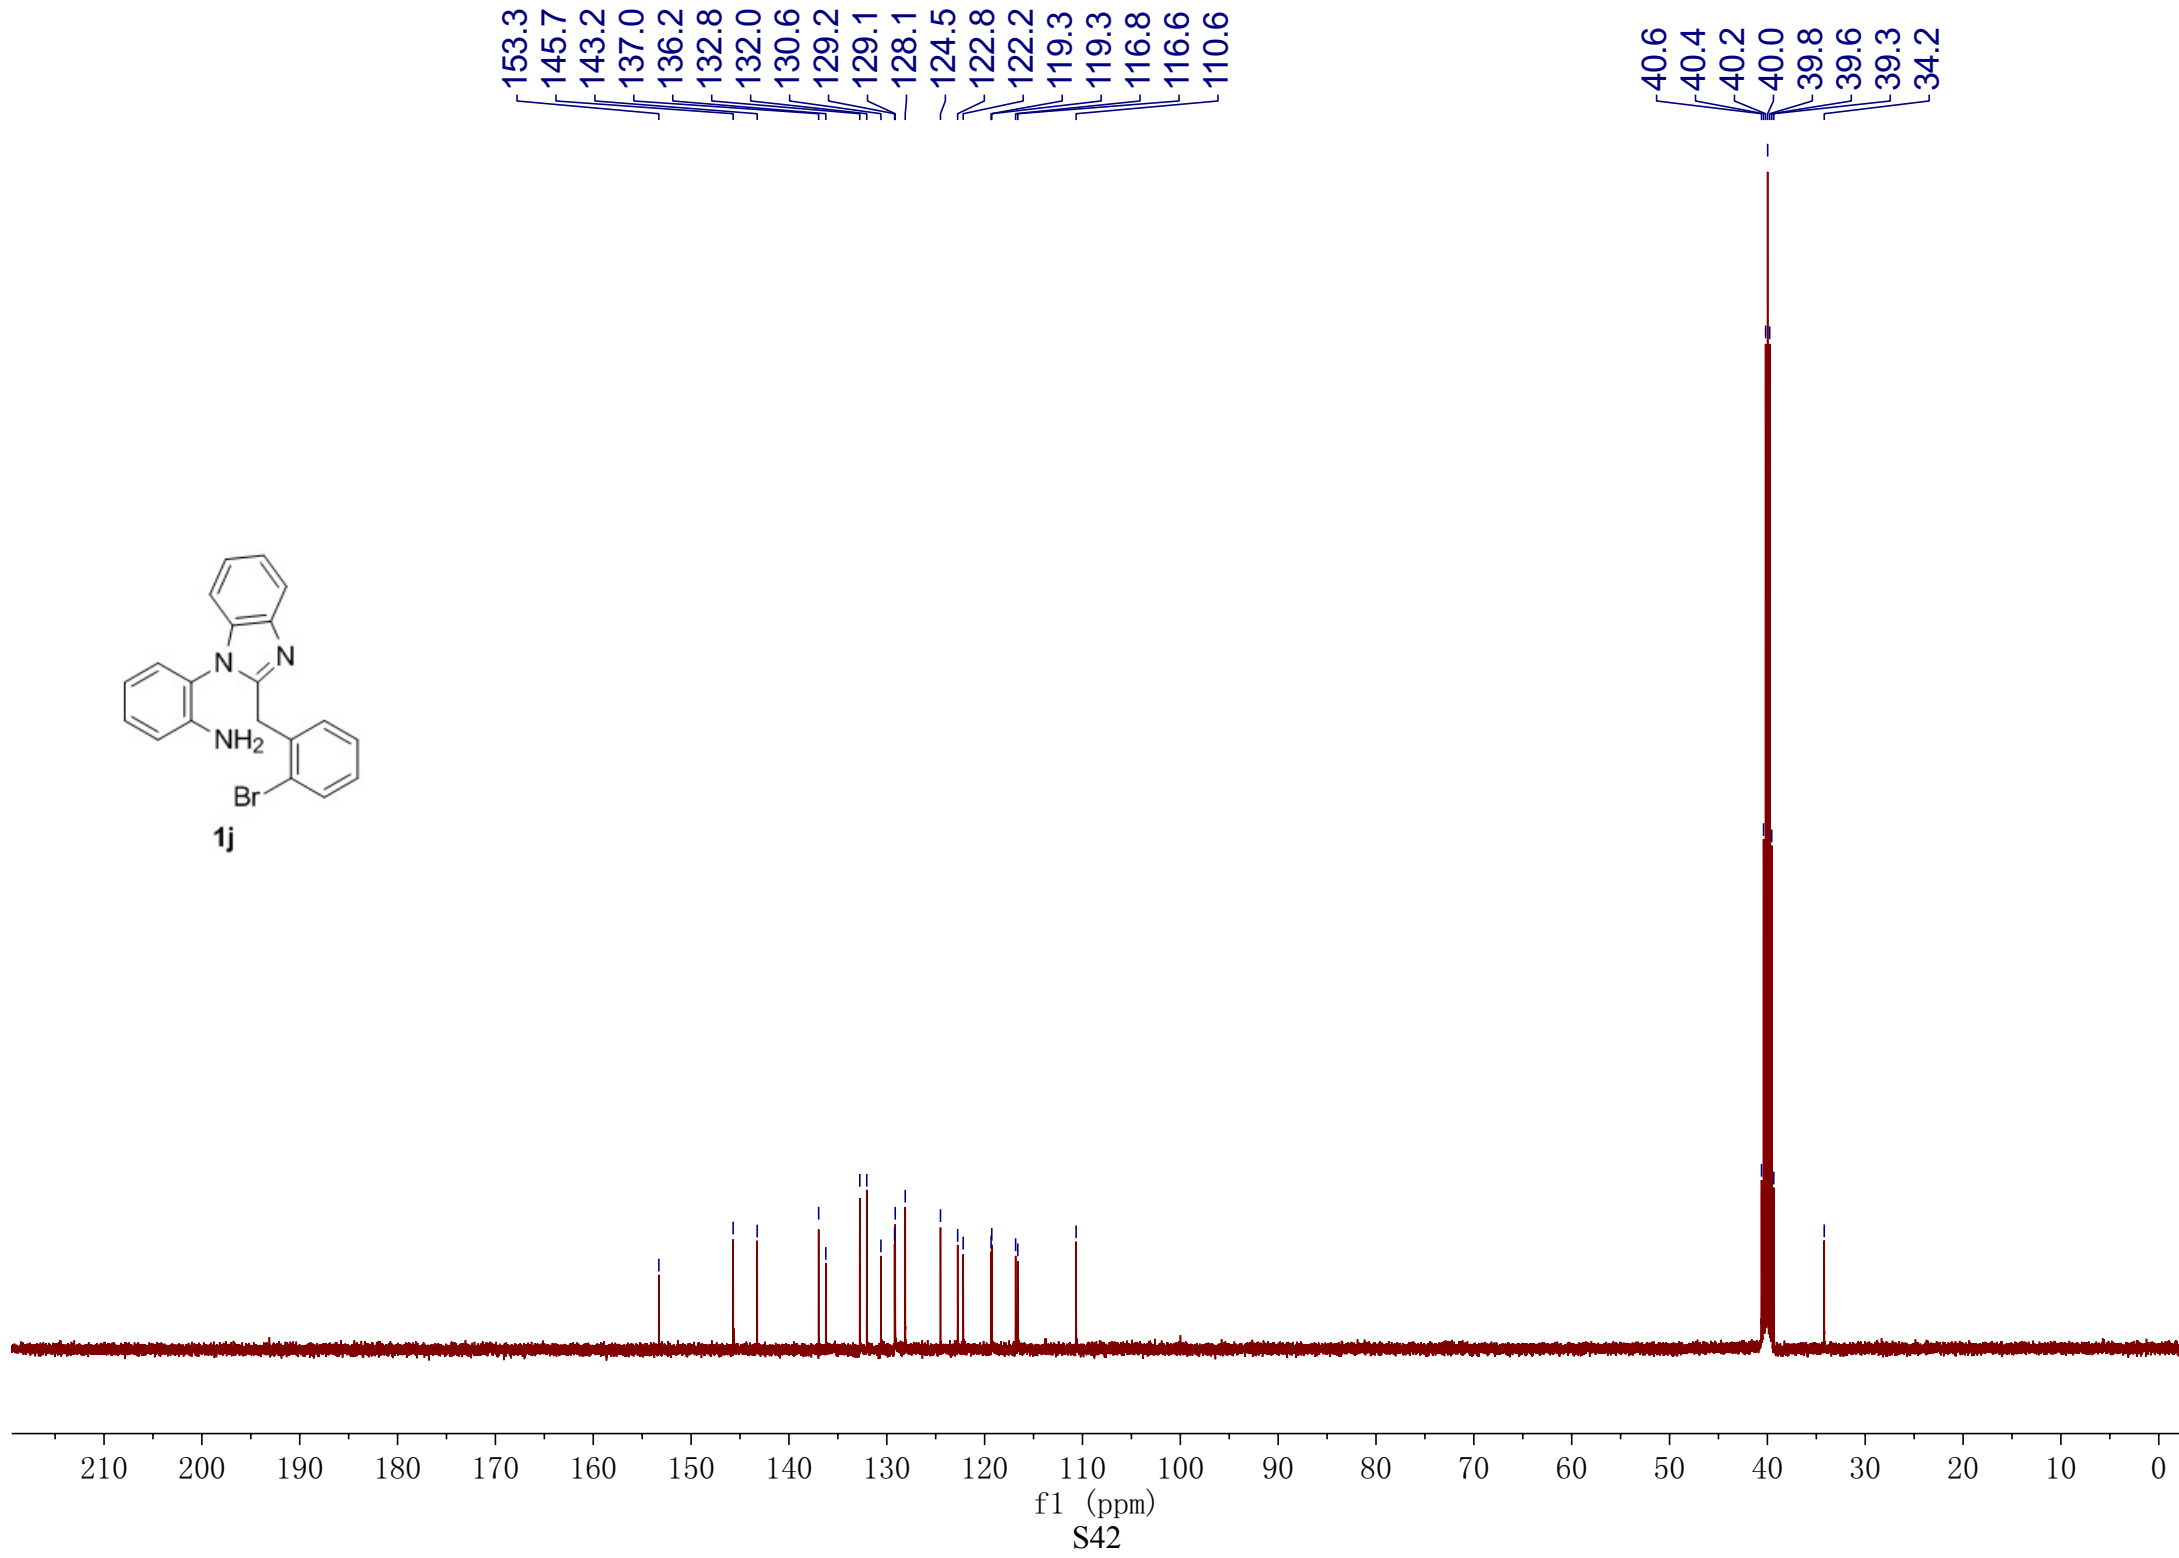

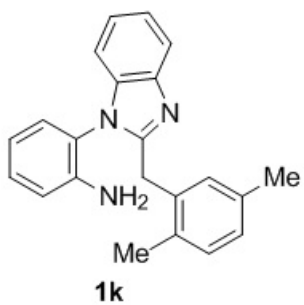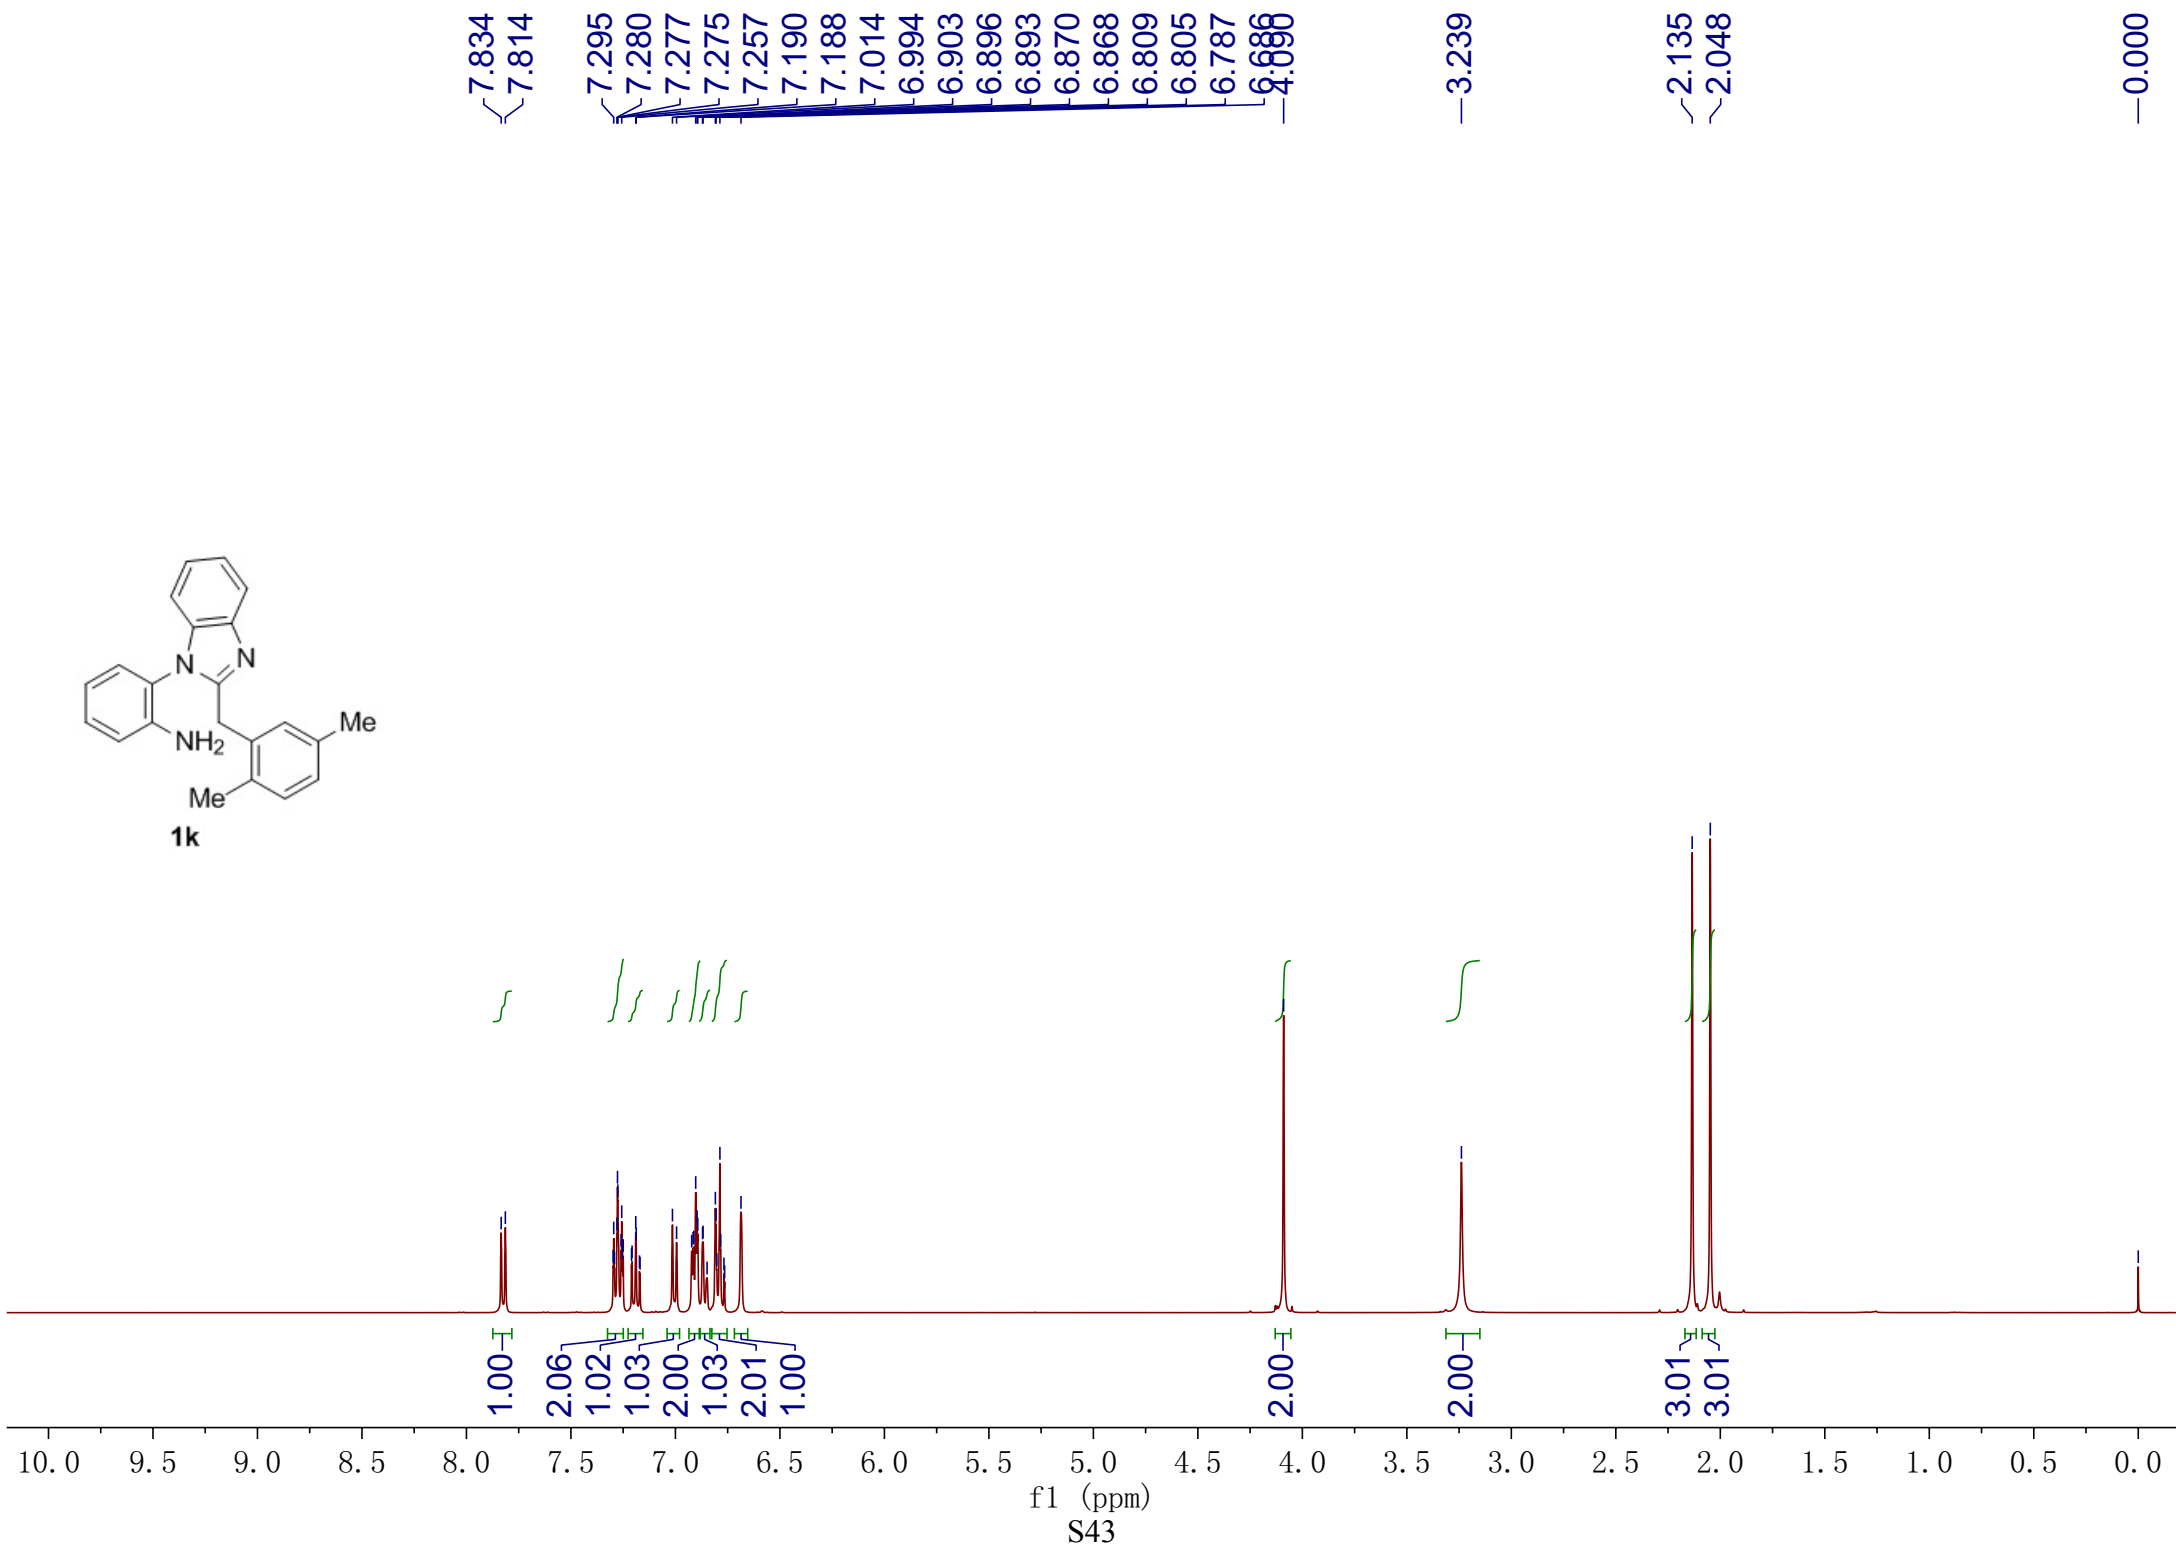

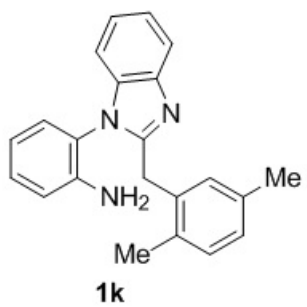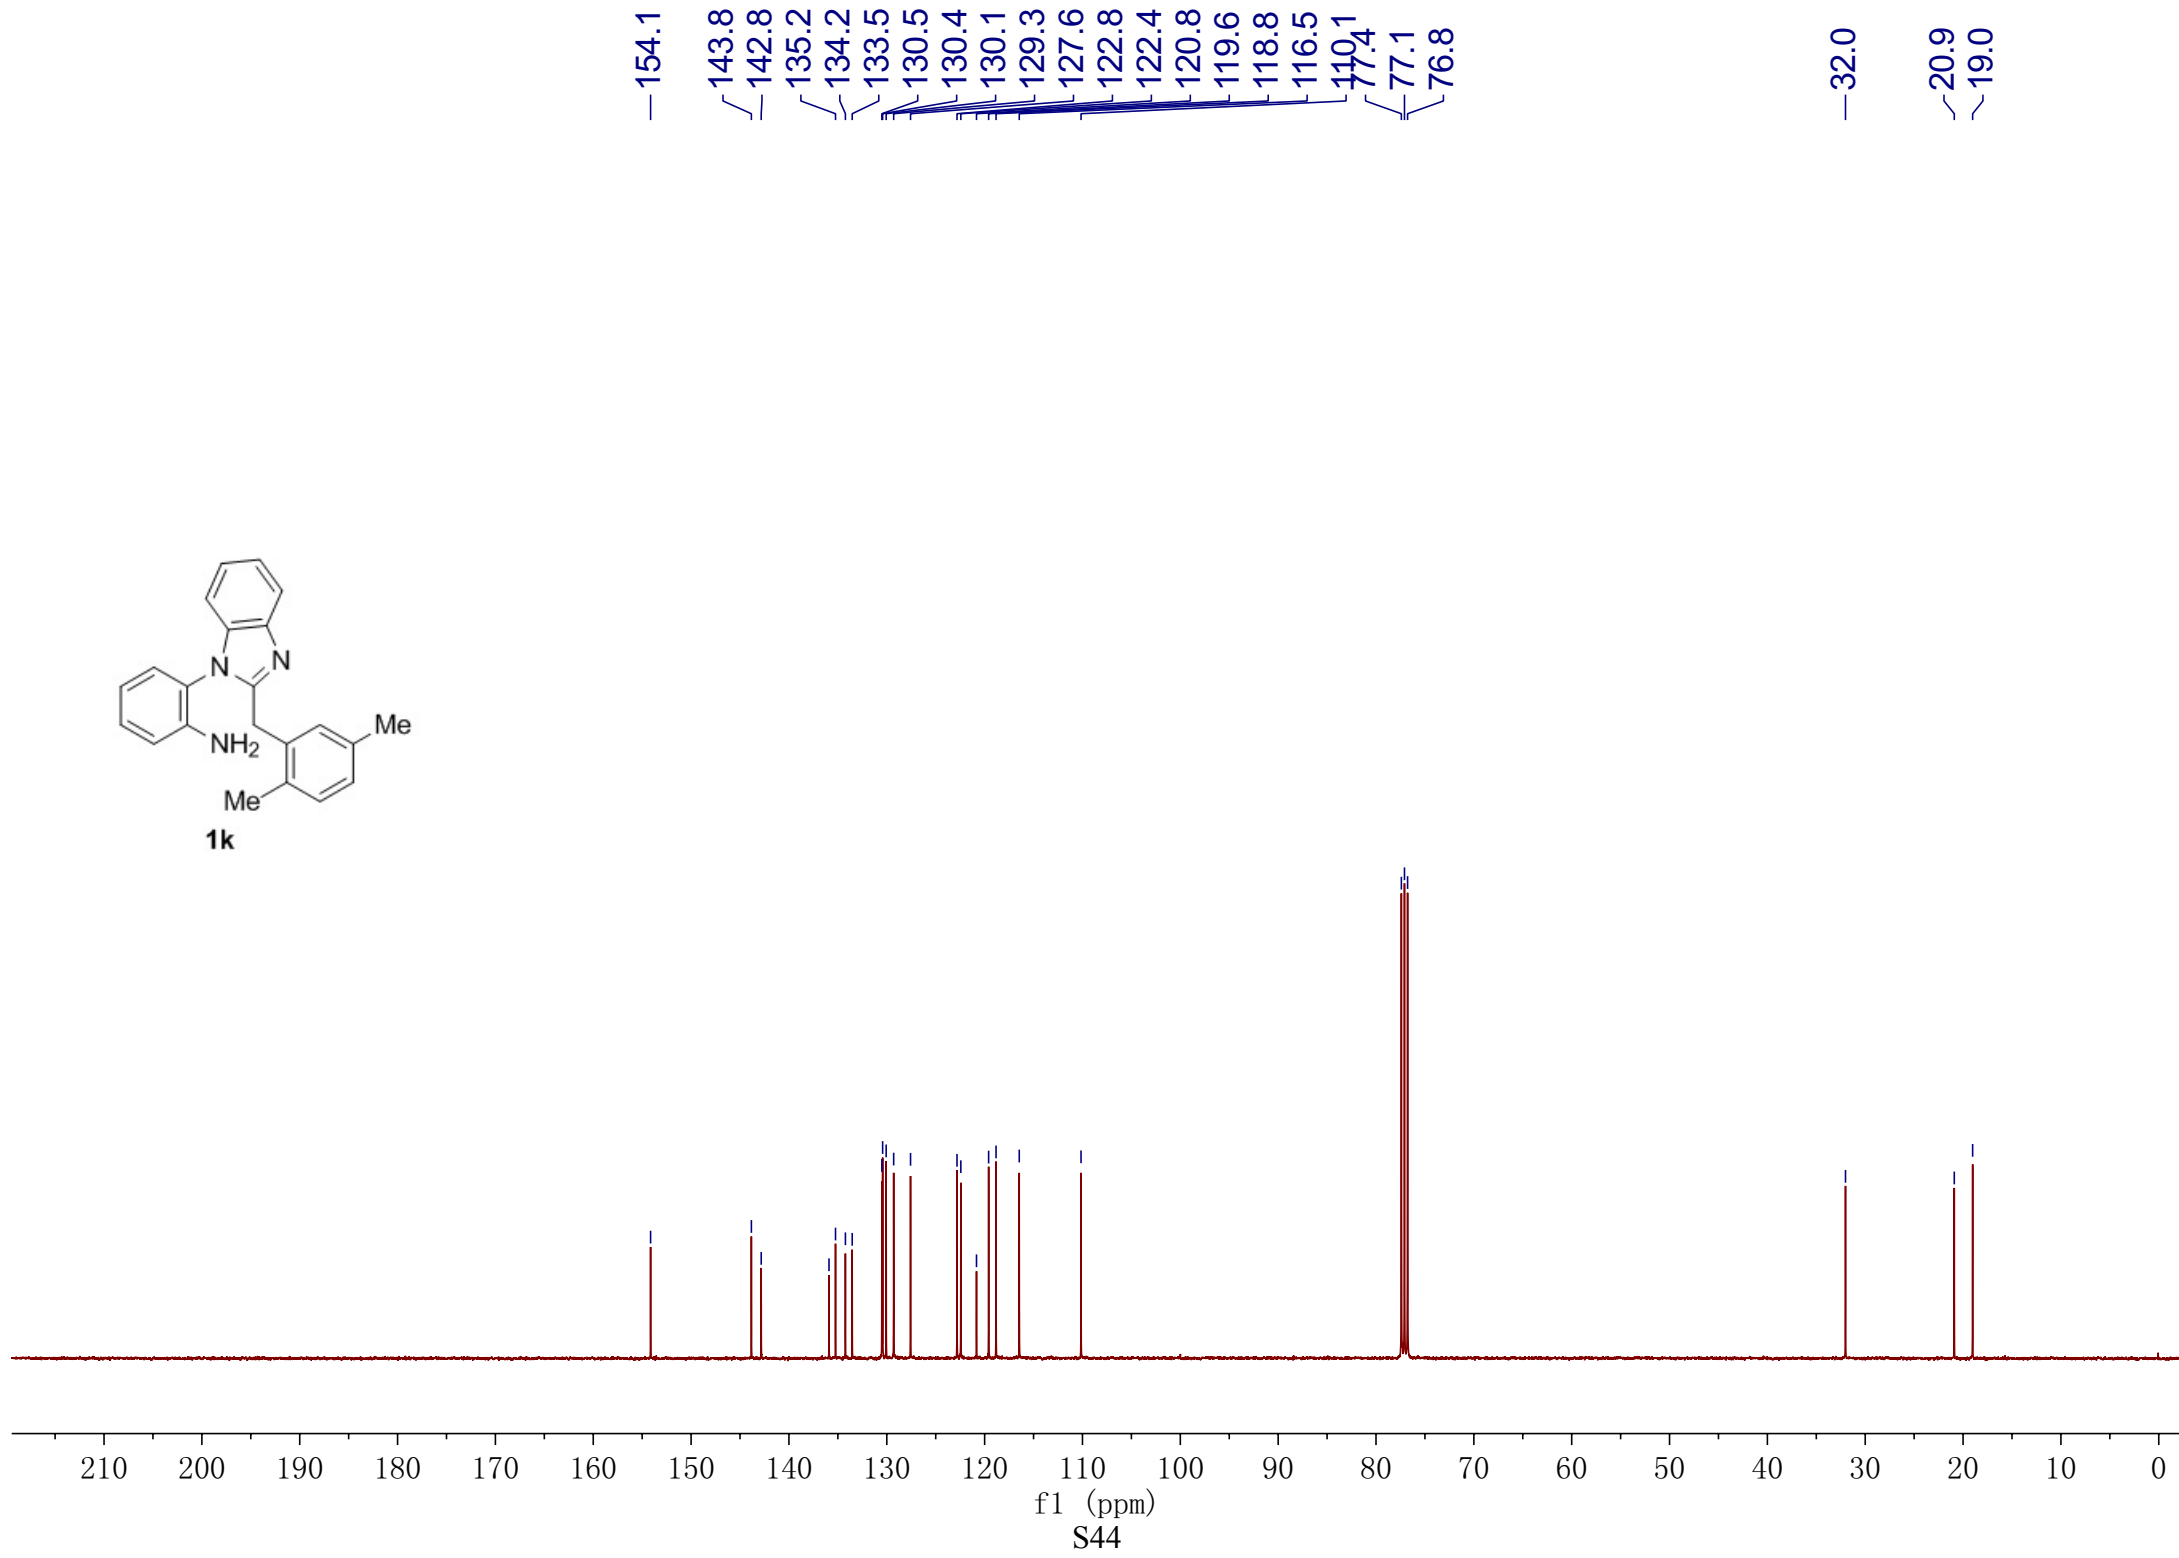



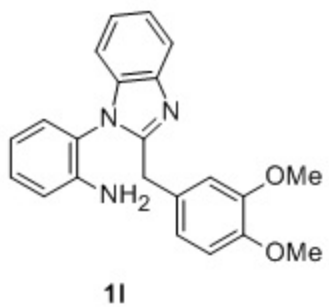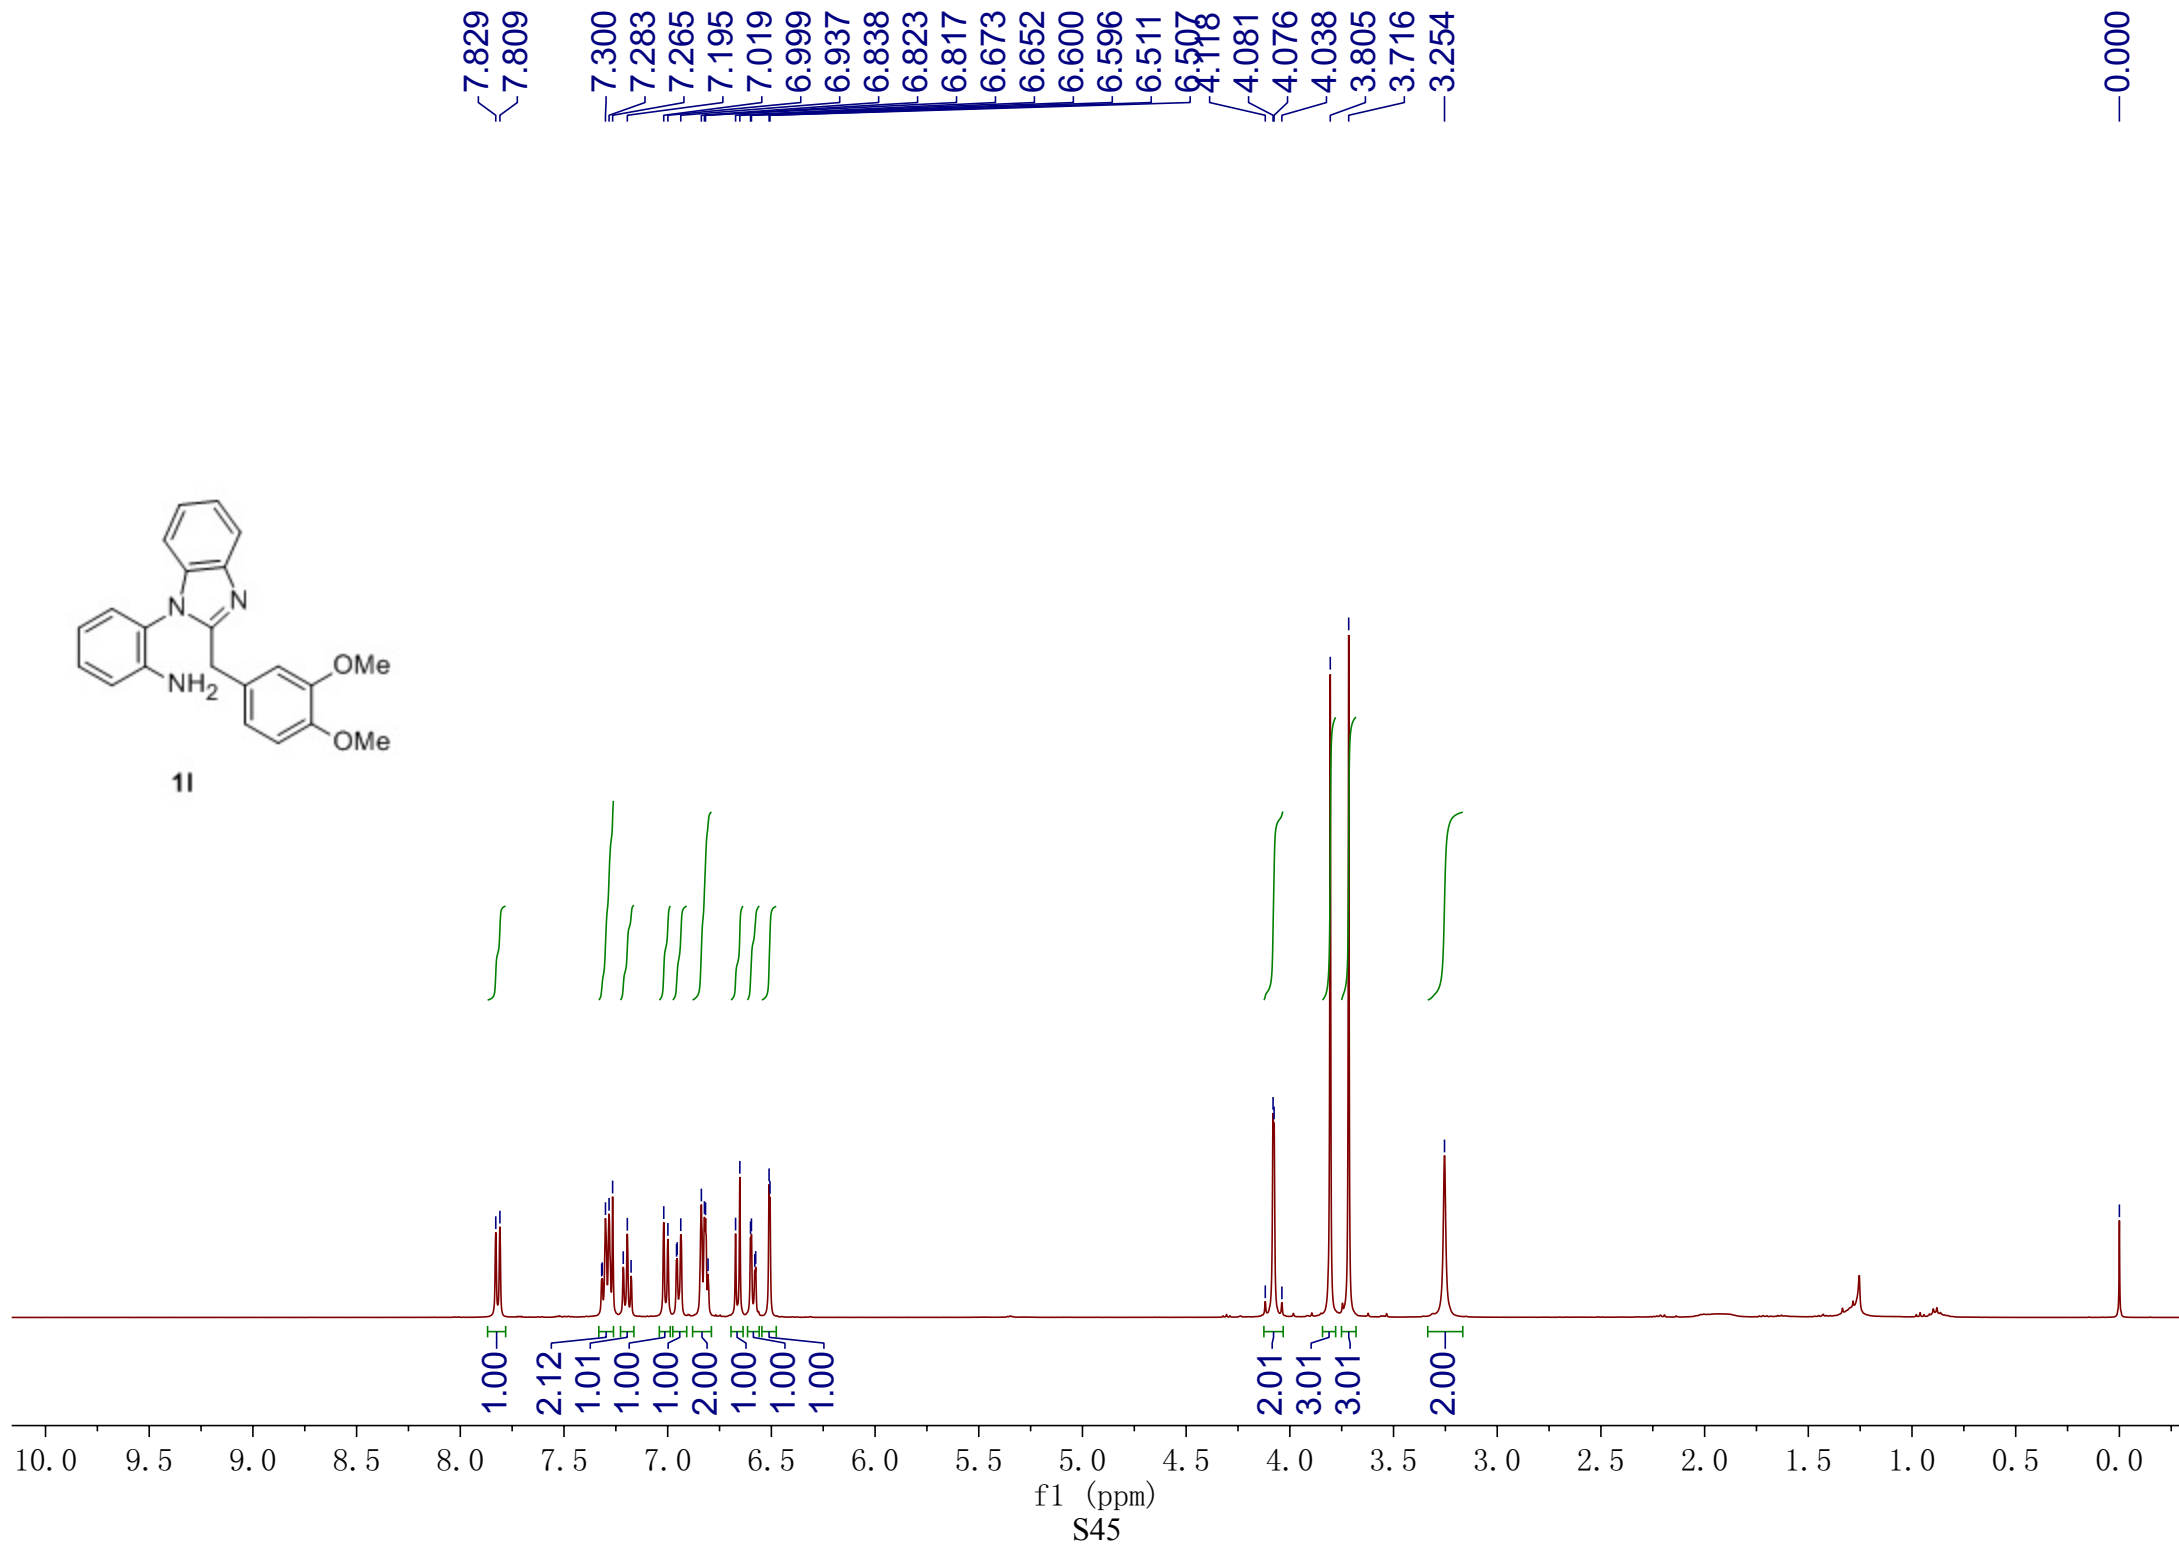

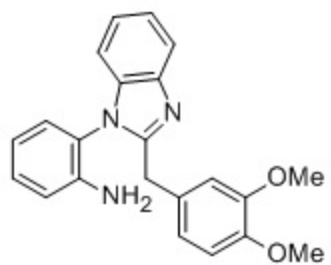

11

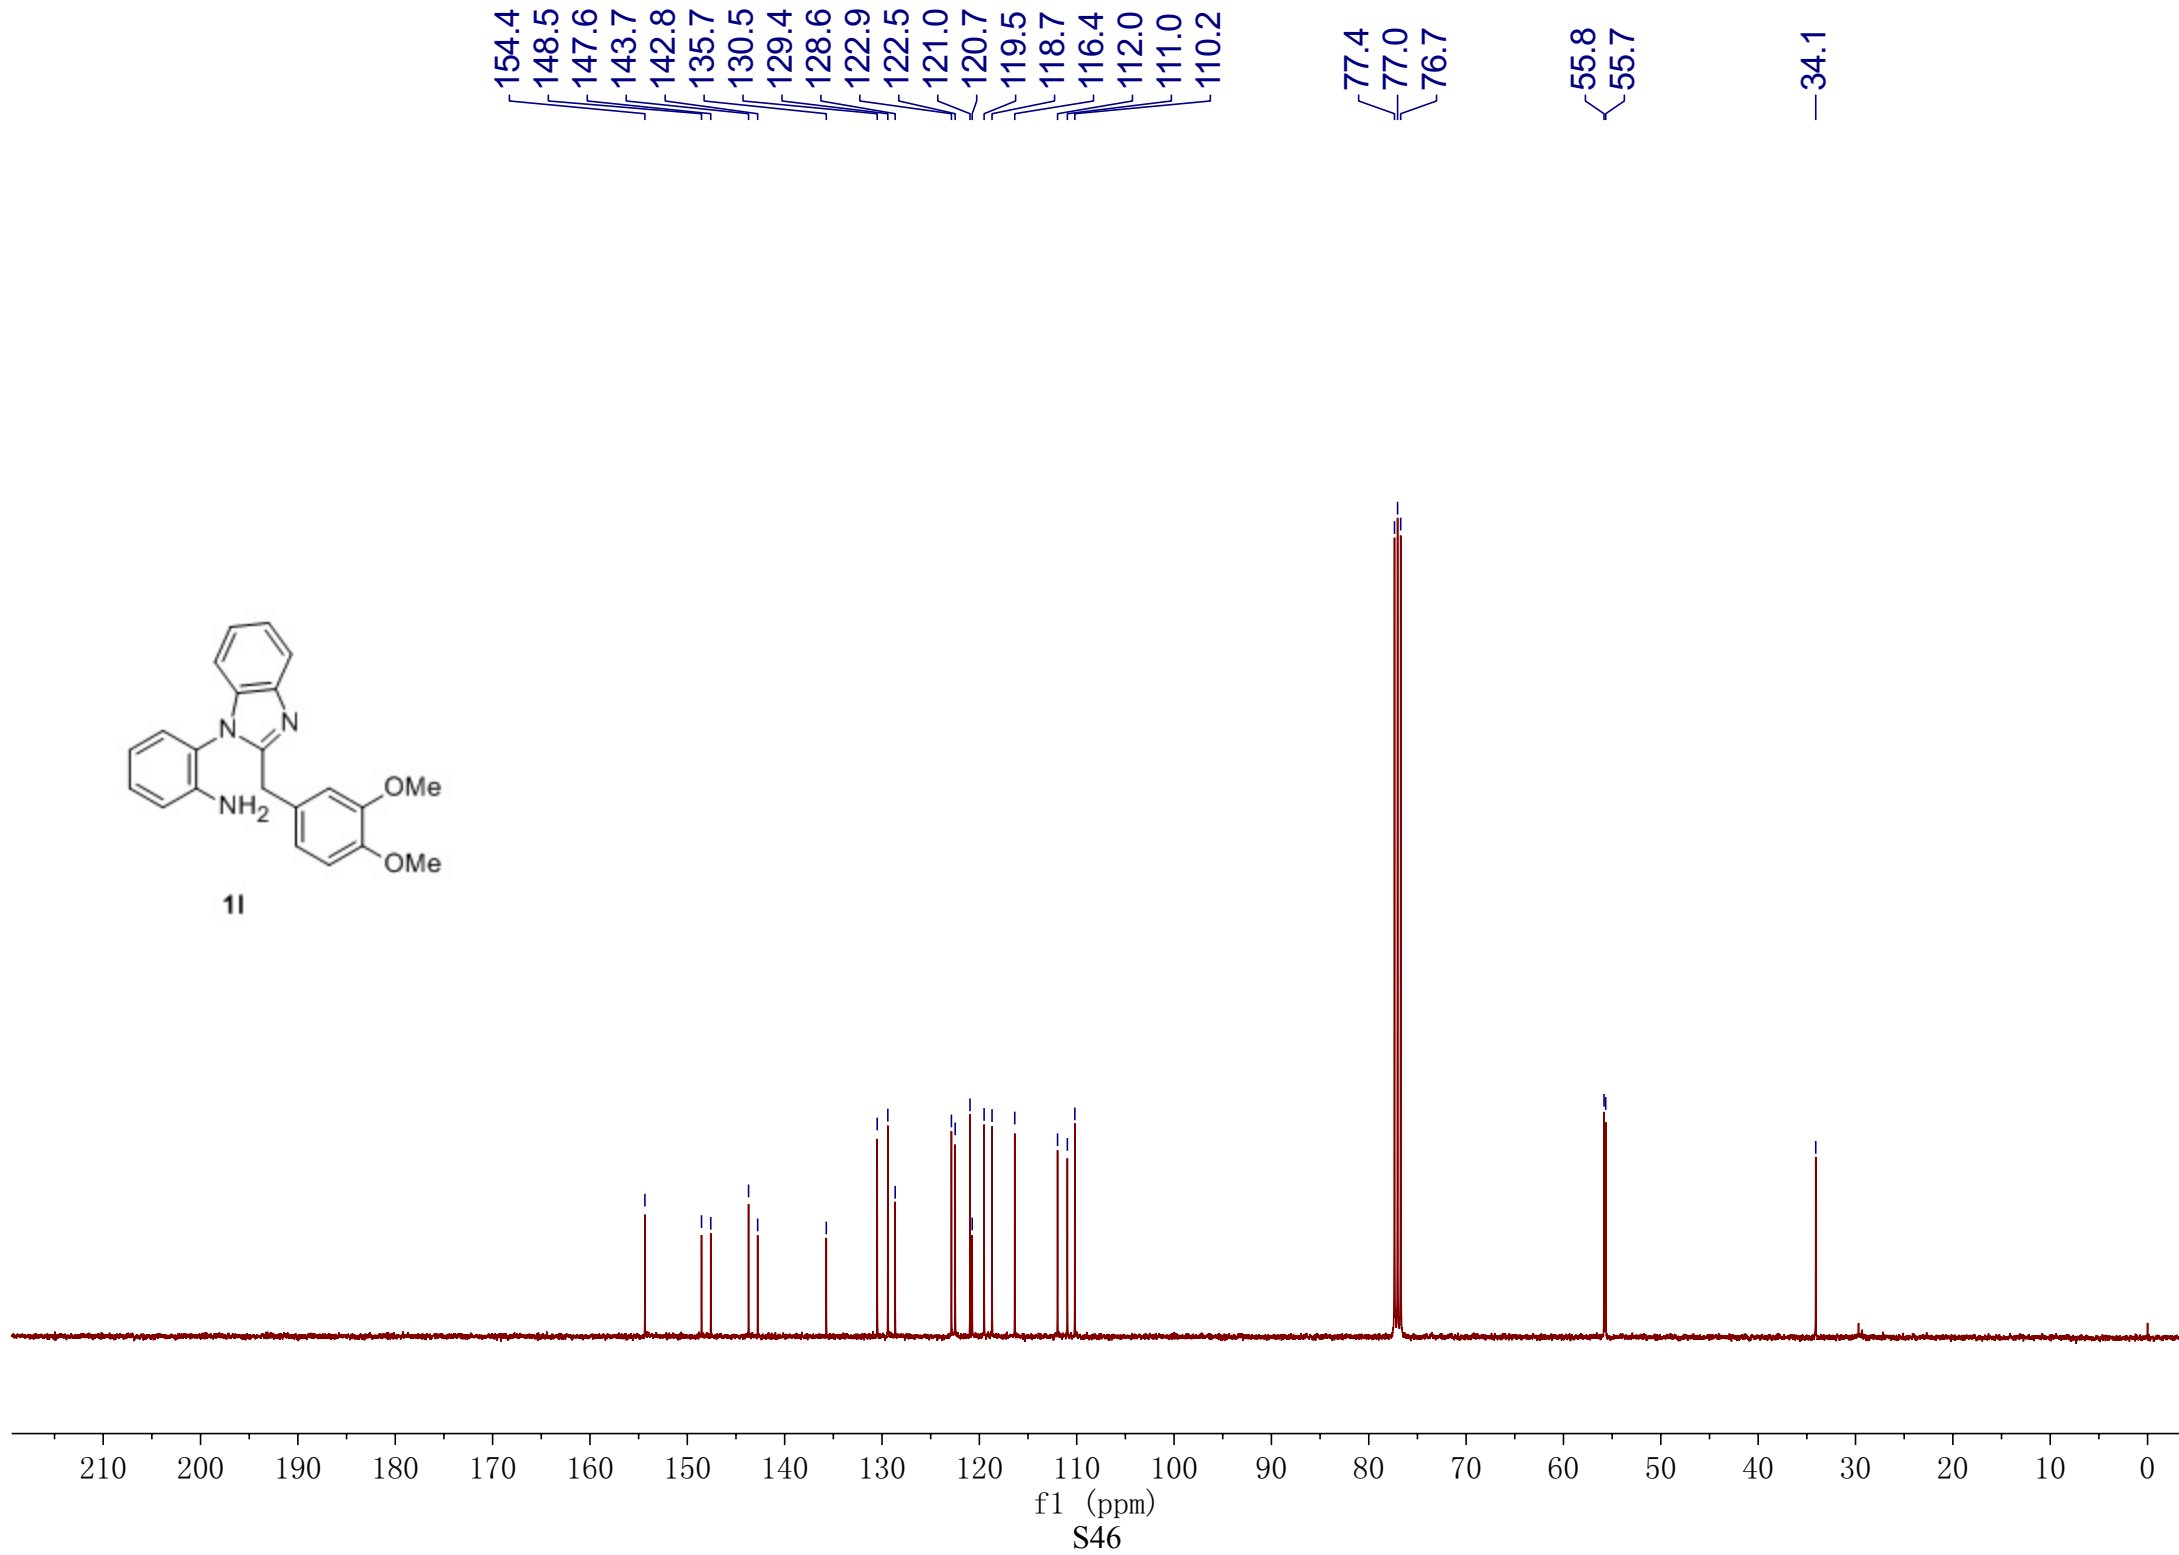

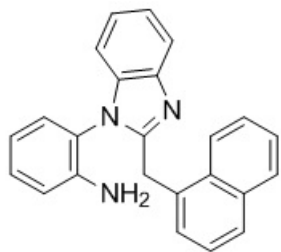

**1m**

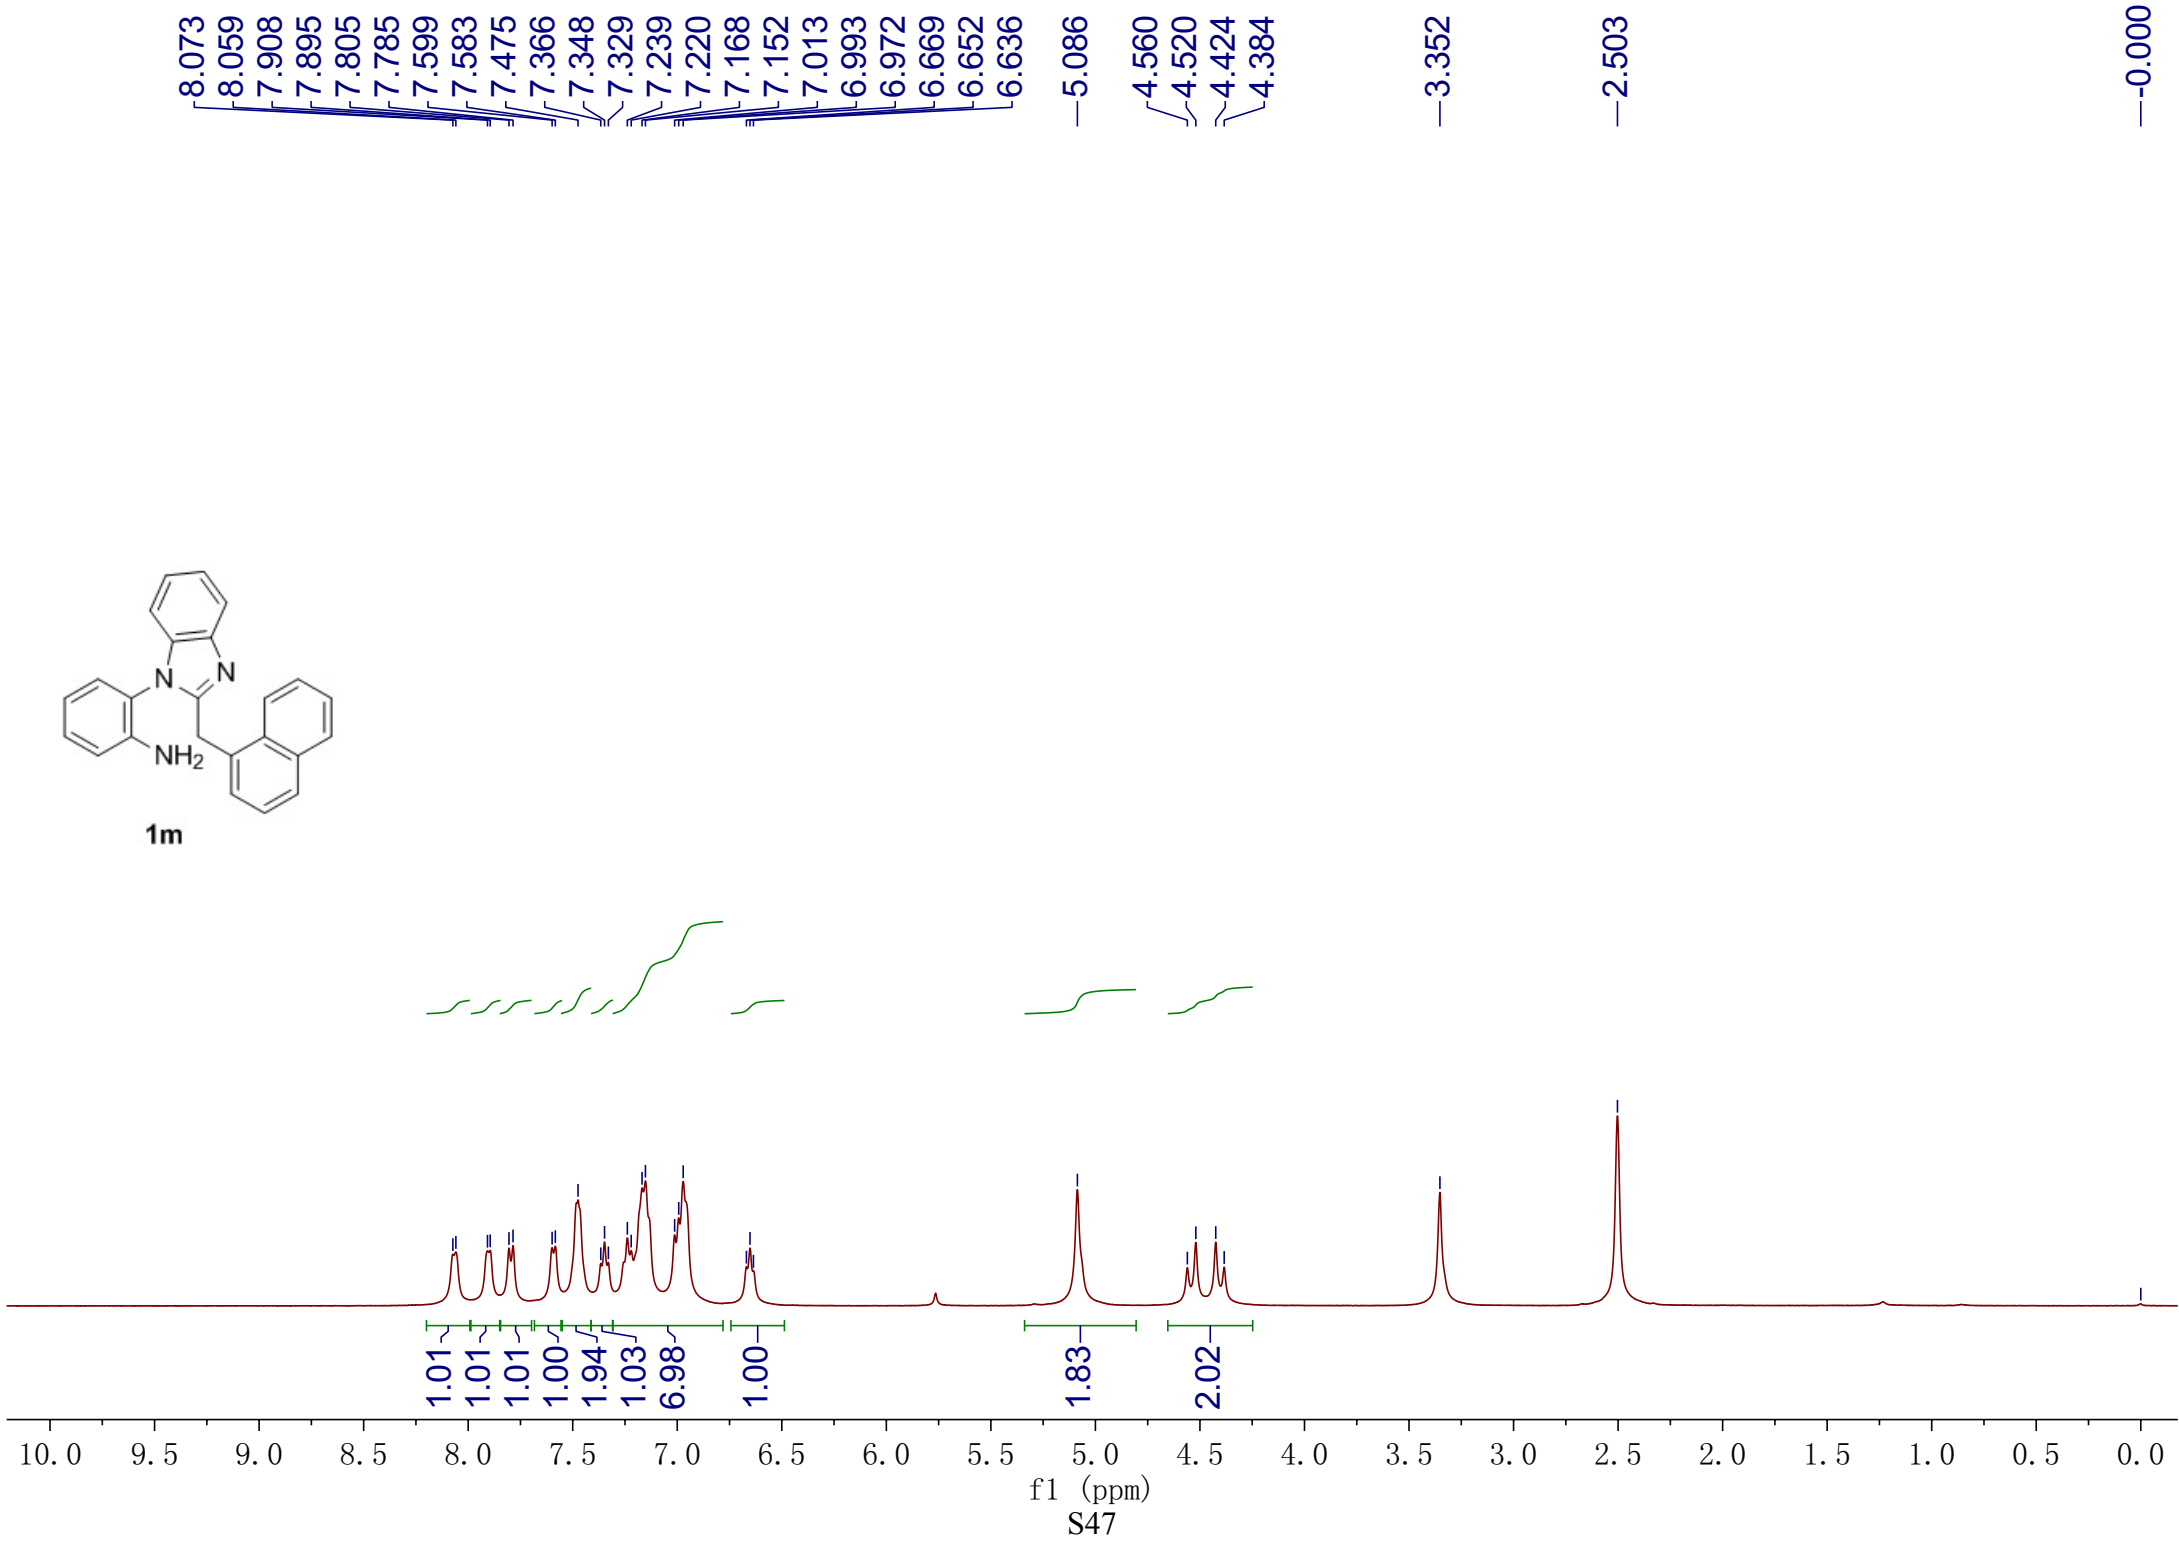

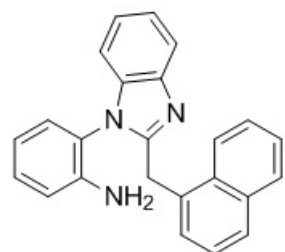

1m

154.1  
145.7  
143.2  
136.3  
133.8  
133.3  
132.1  
130.6  
129.3  
128.8  
127.8  
127.6  
126.5  
126.0  
125.9  
124.7  
122.7  
122.1  
119.6  
119.2  
116.9  
116.7  
110.6

40.6  
40.4  
40.2  
40.0  
39.8  
39.6  
39.4  
31.6

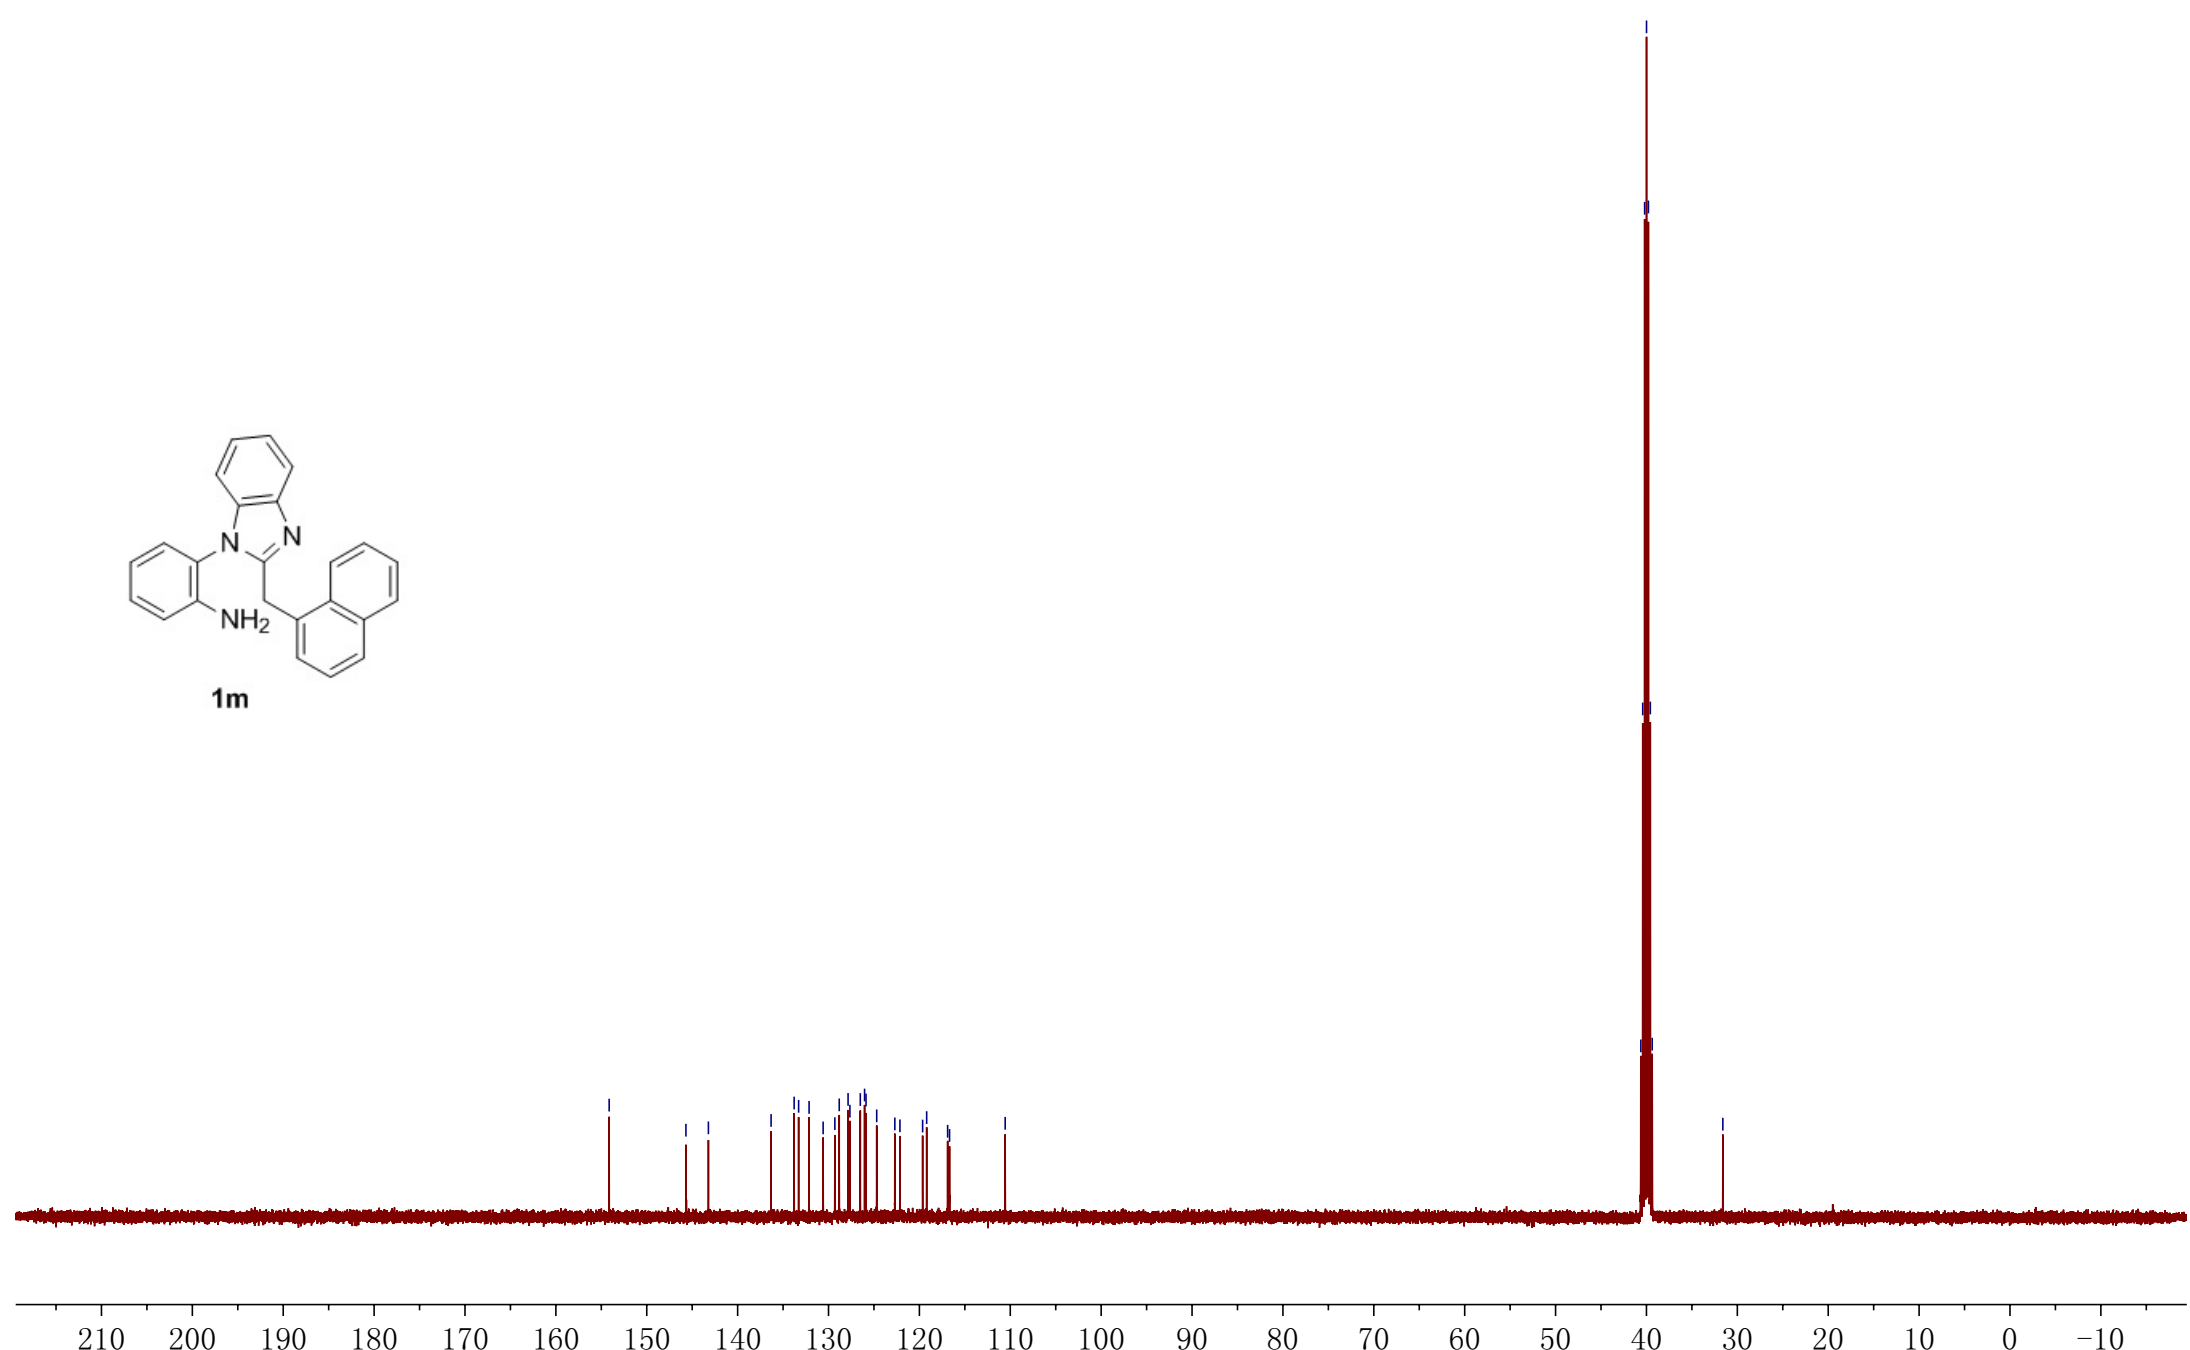

f1 (ppm)  
S48

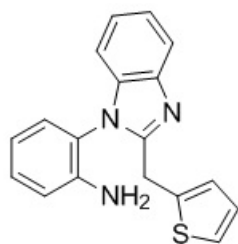

1n

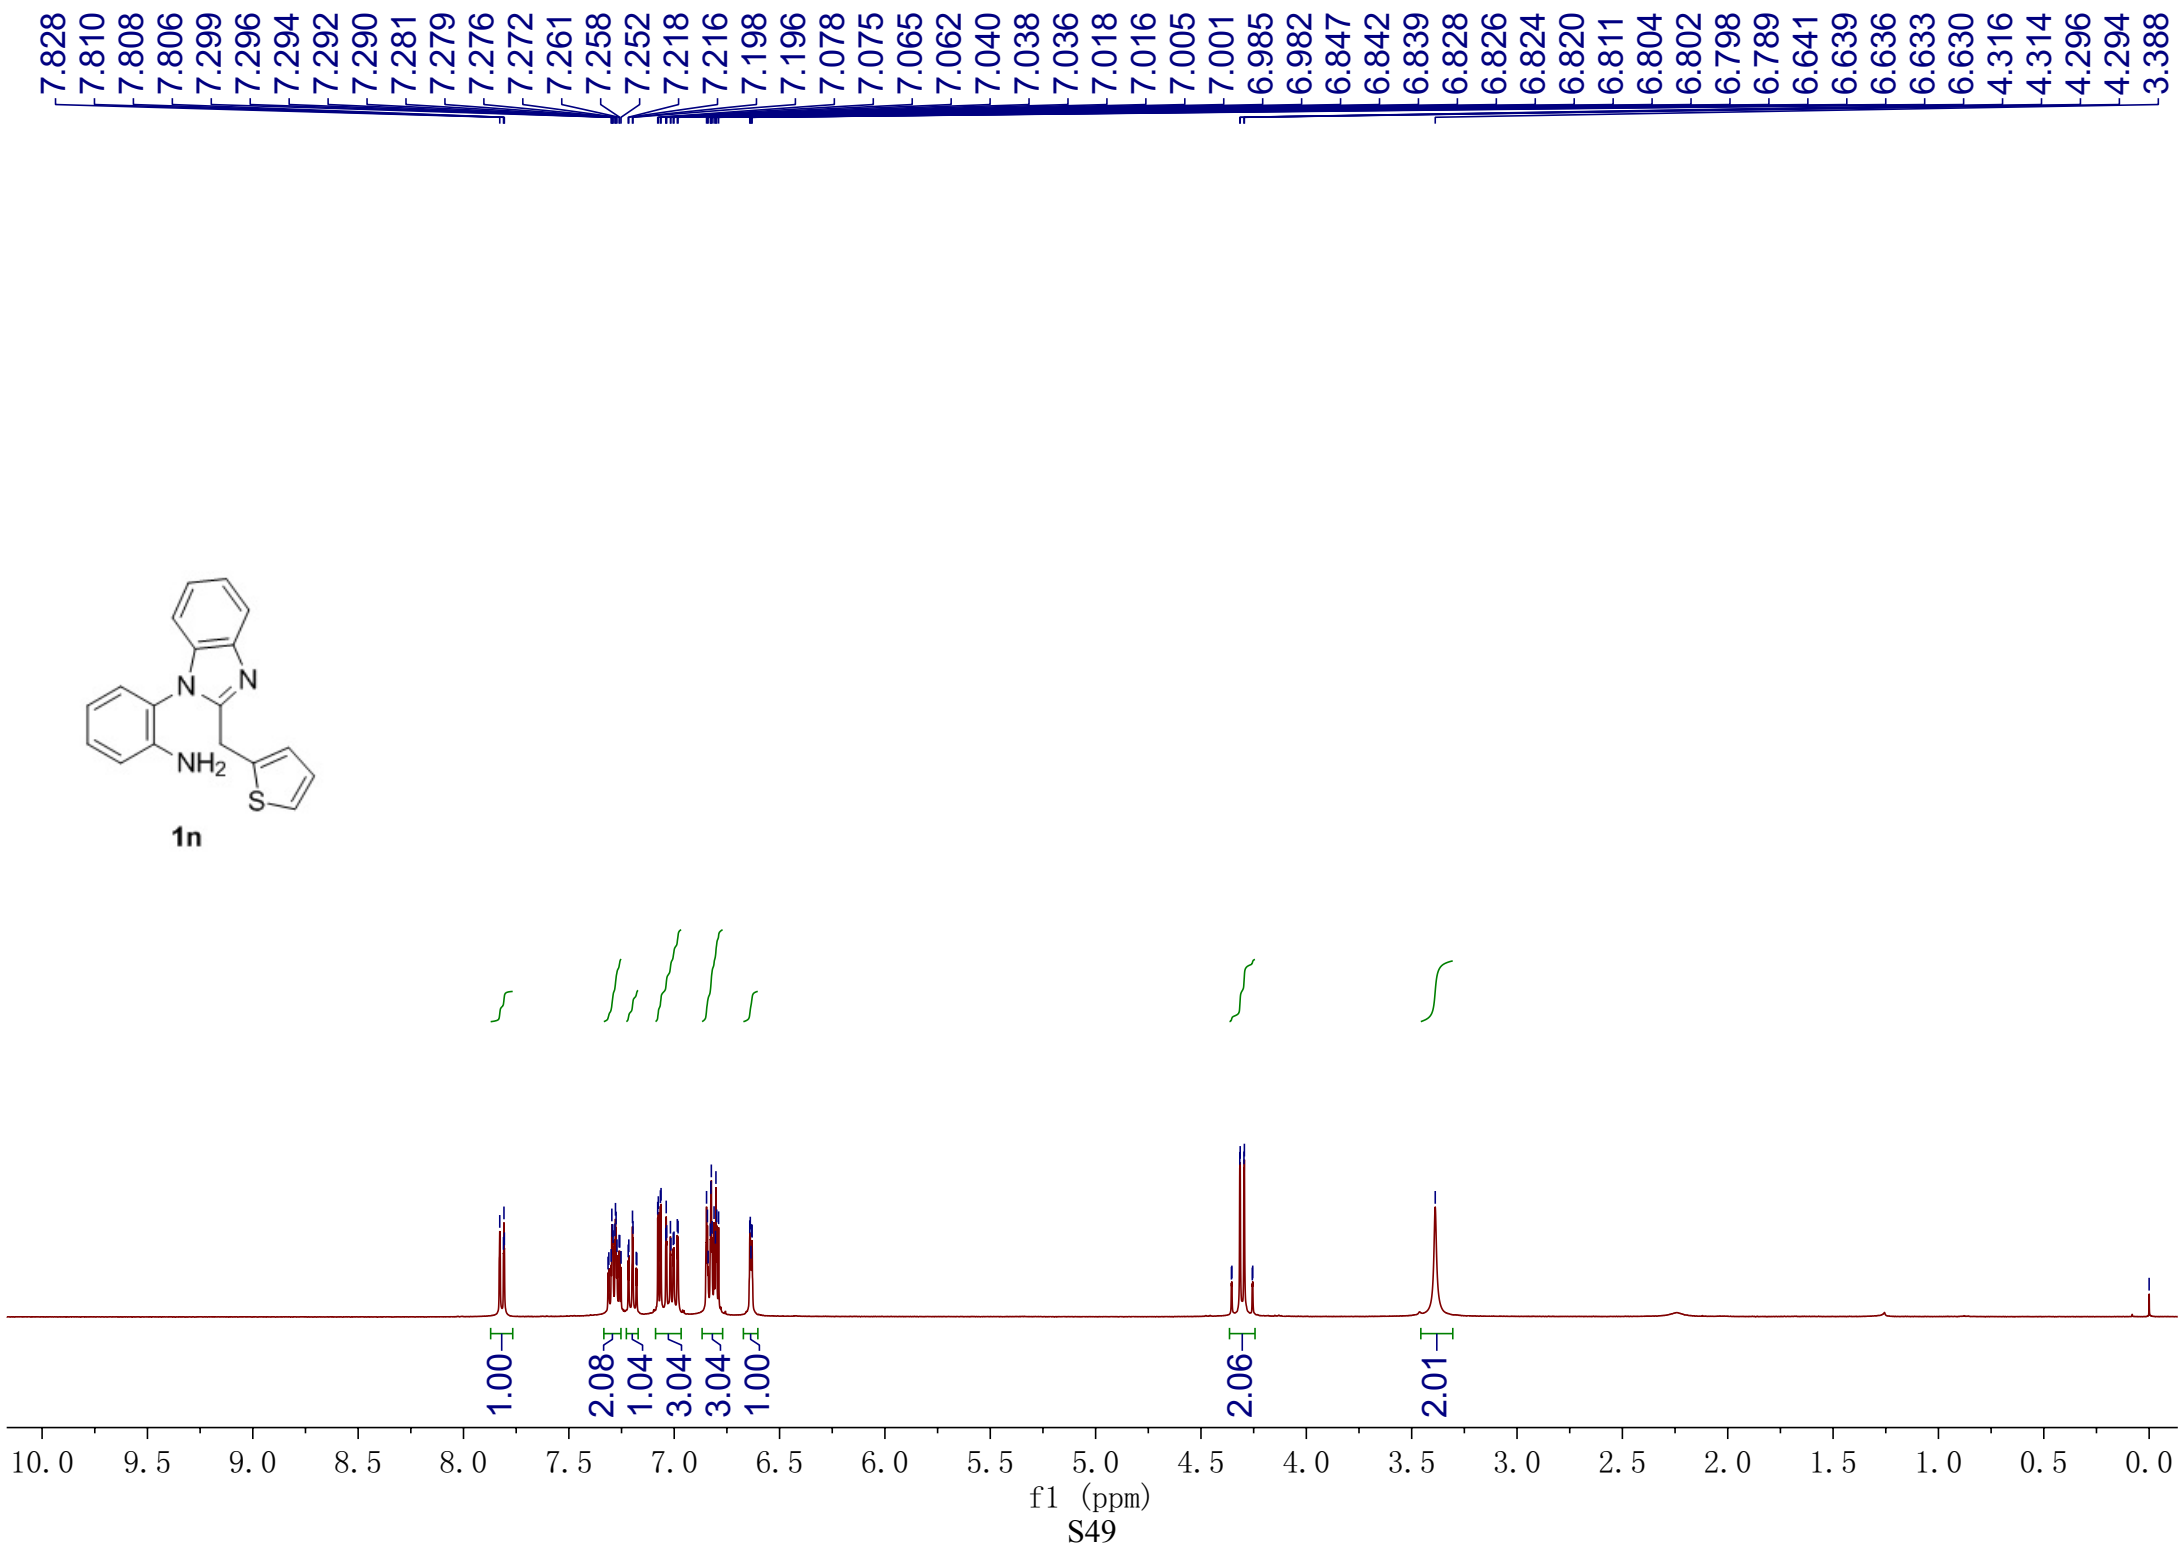

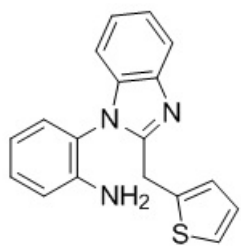

**1n**

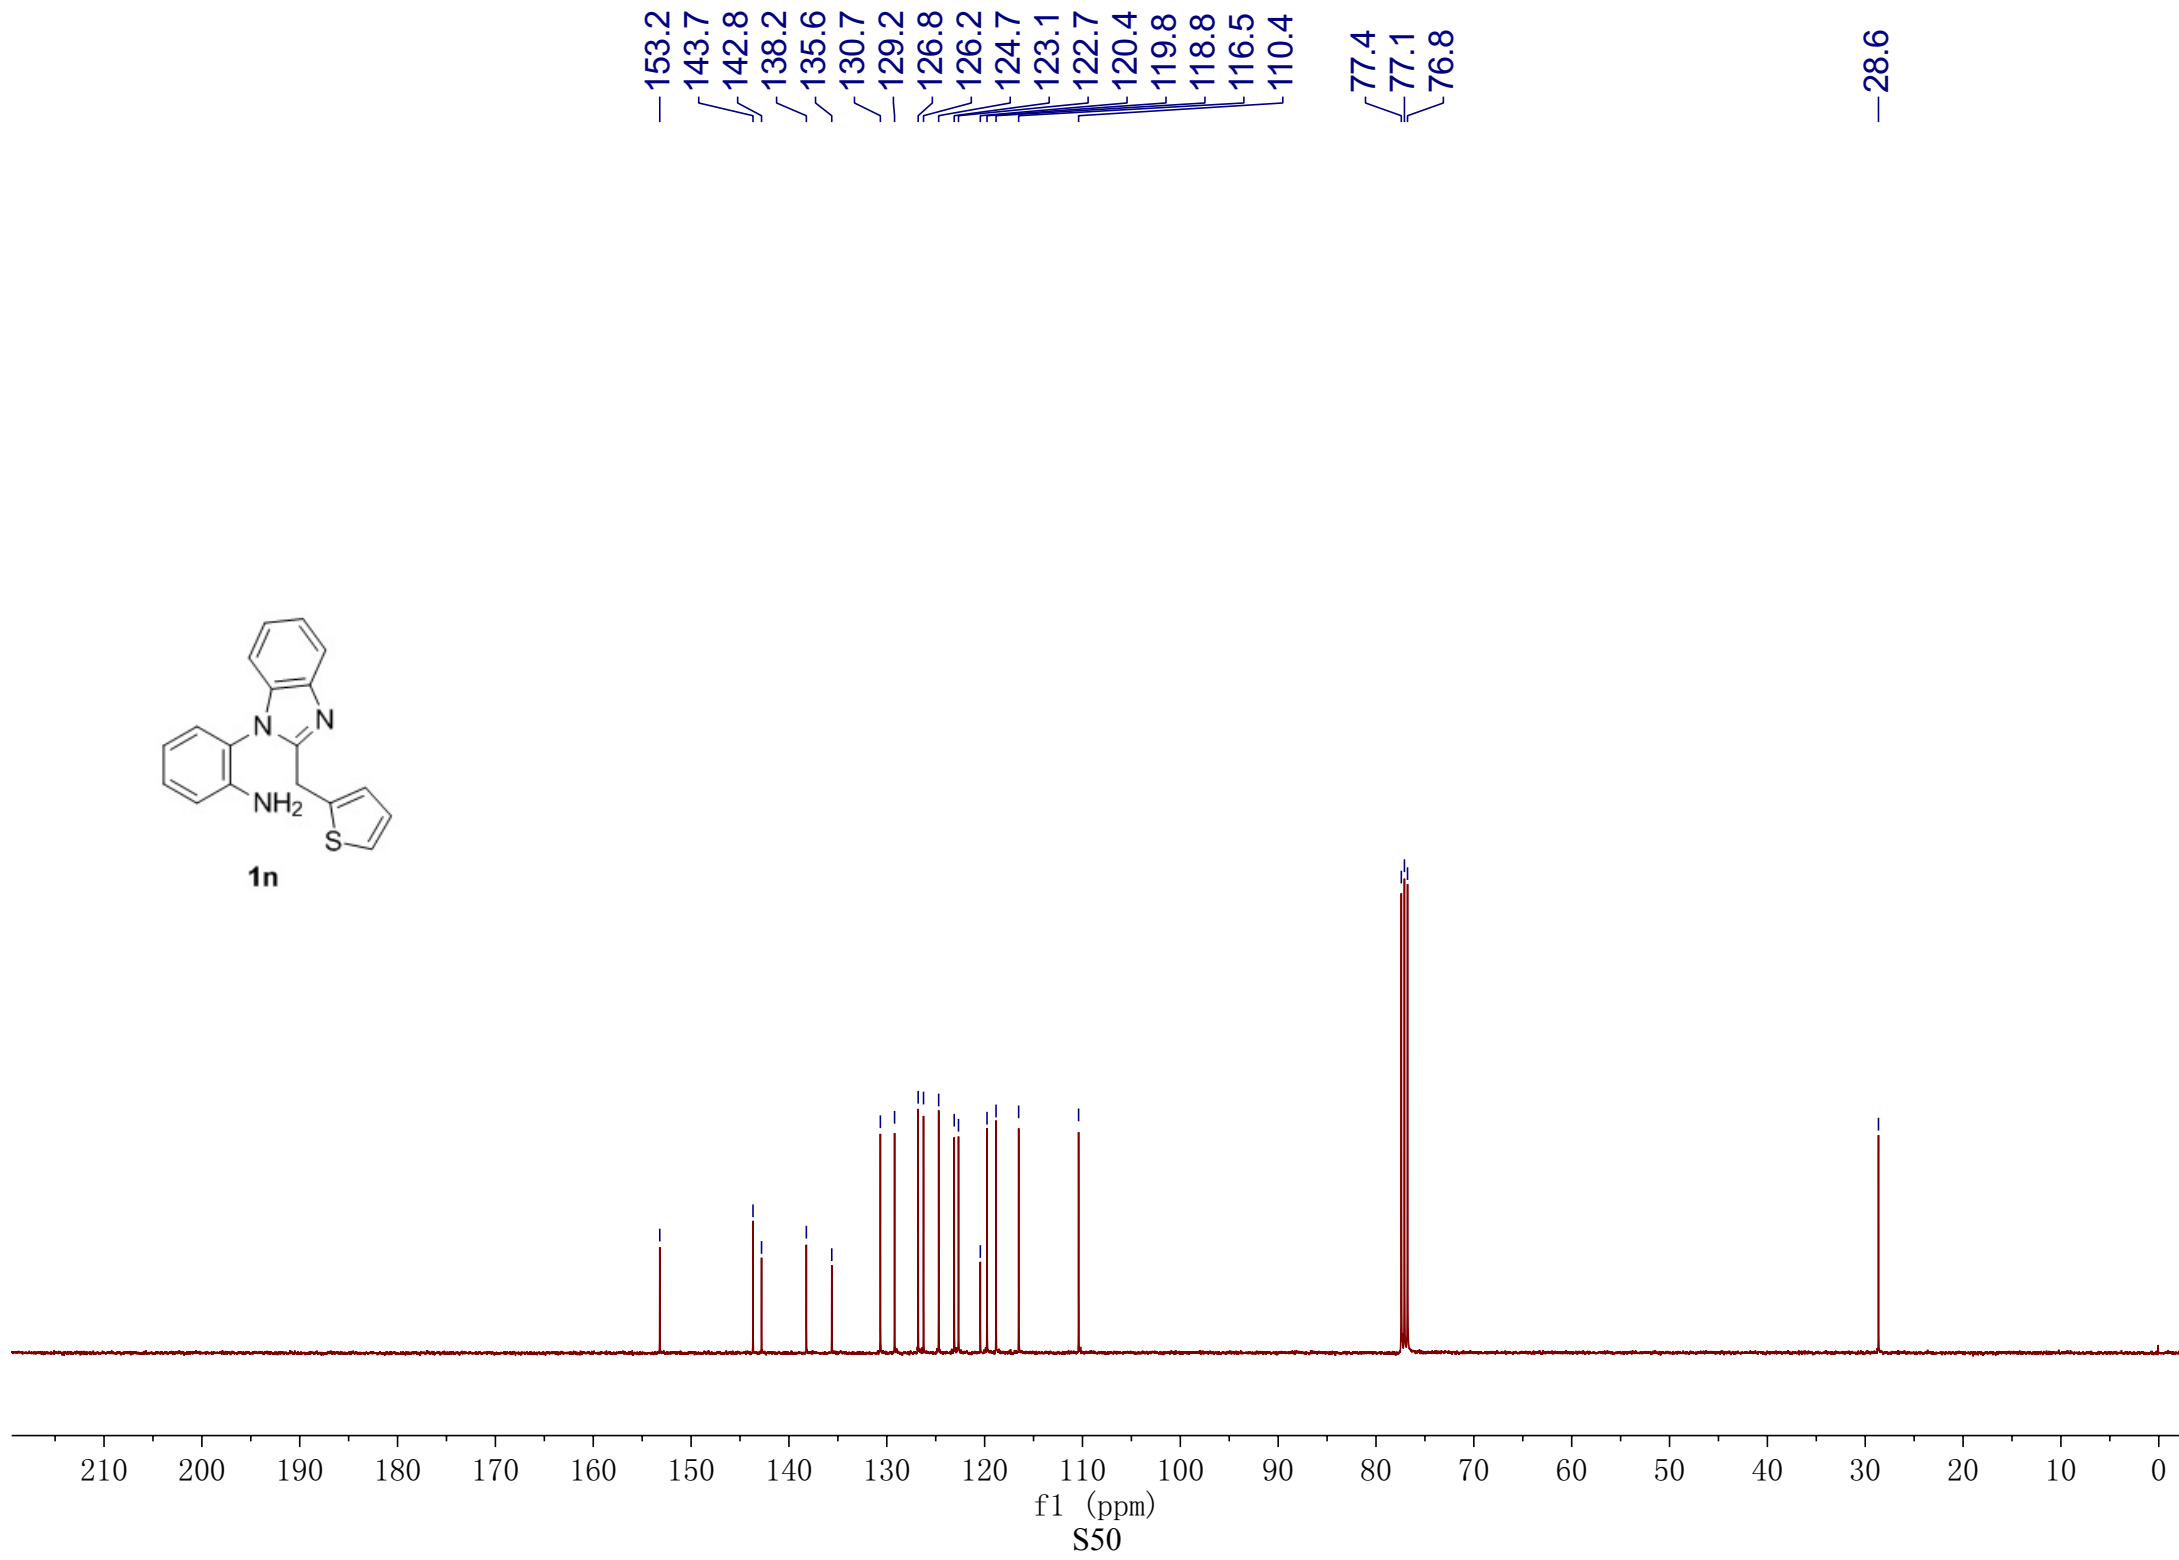

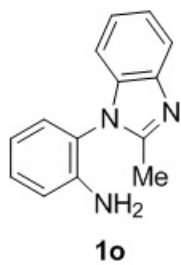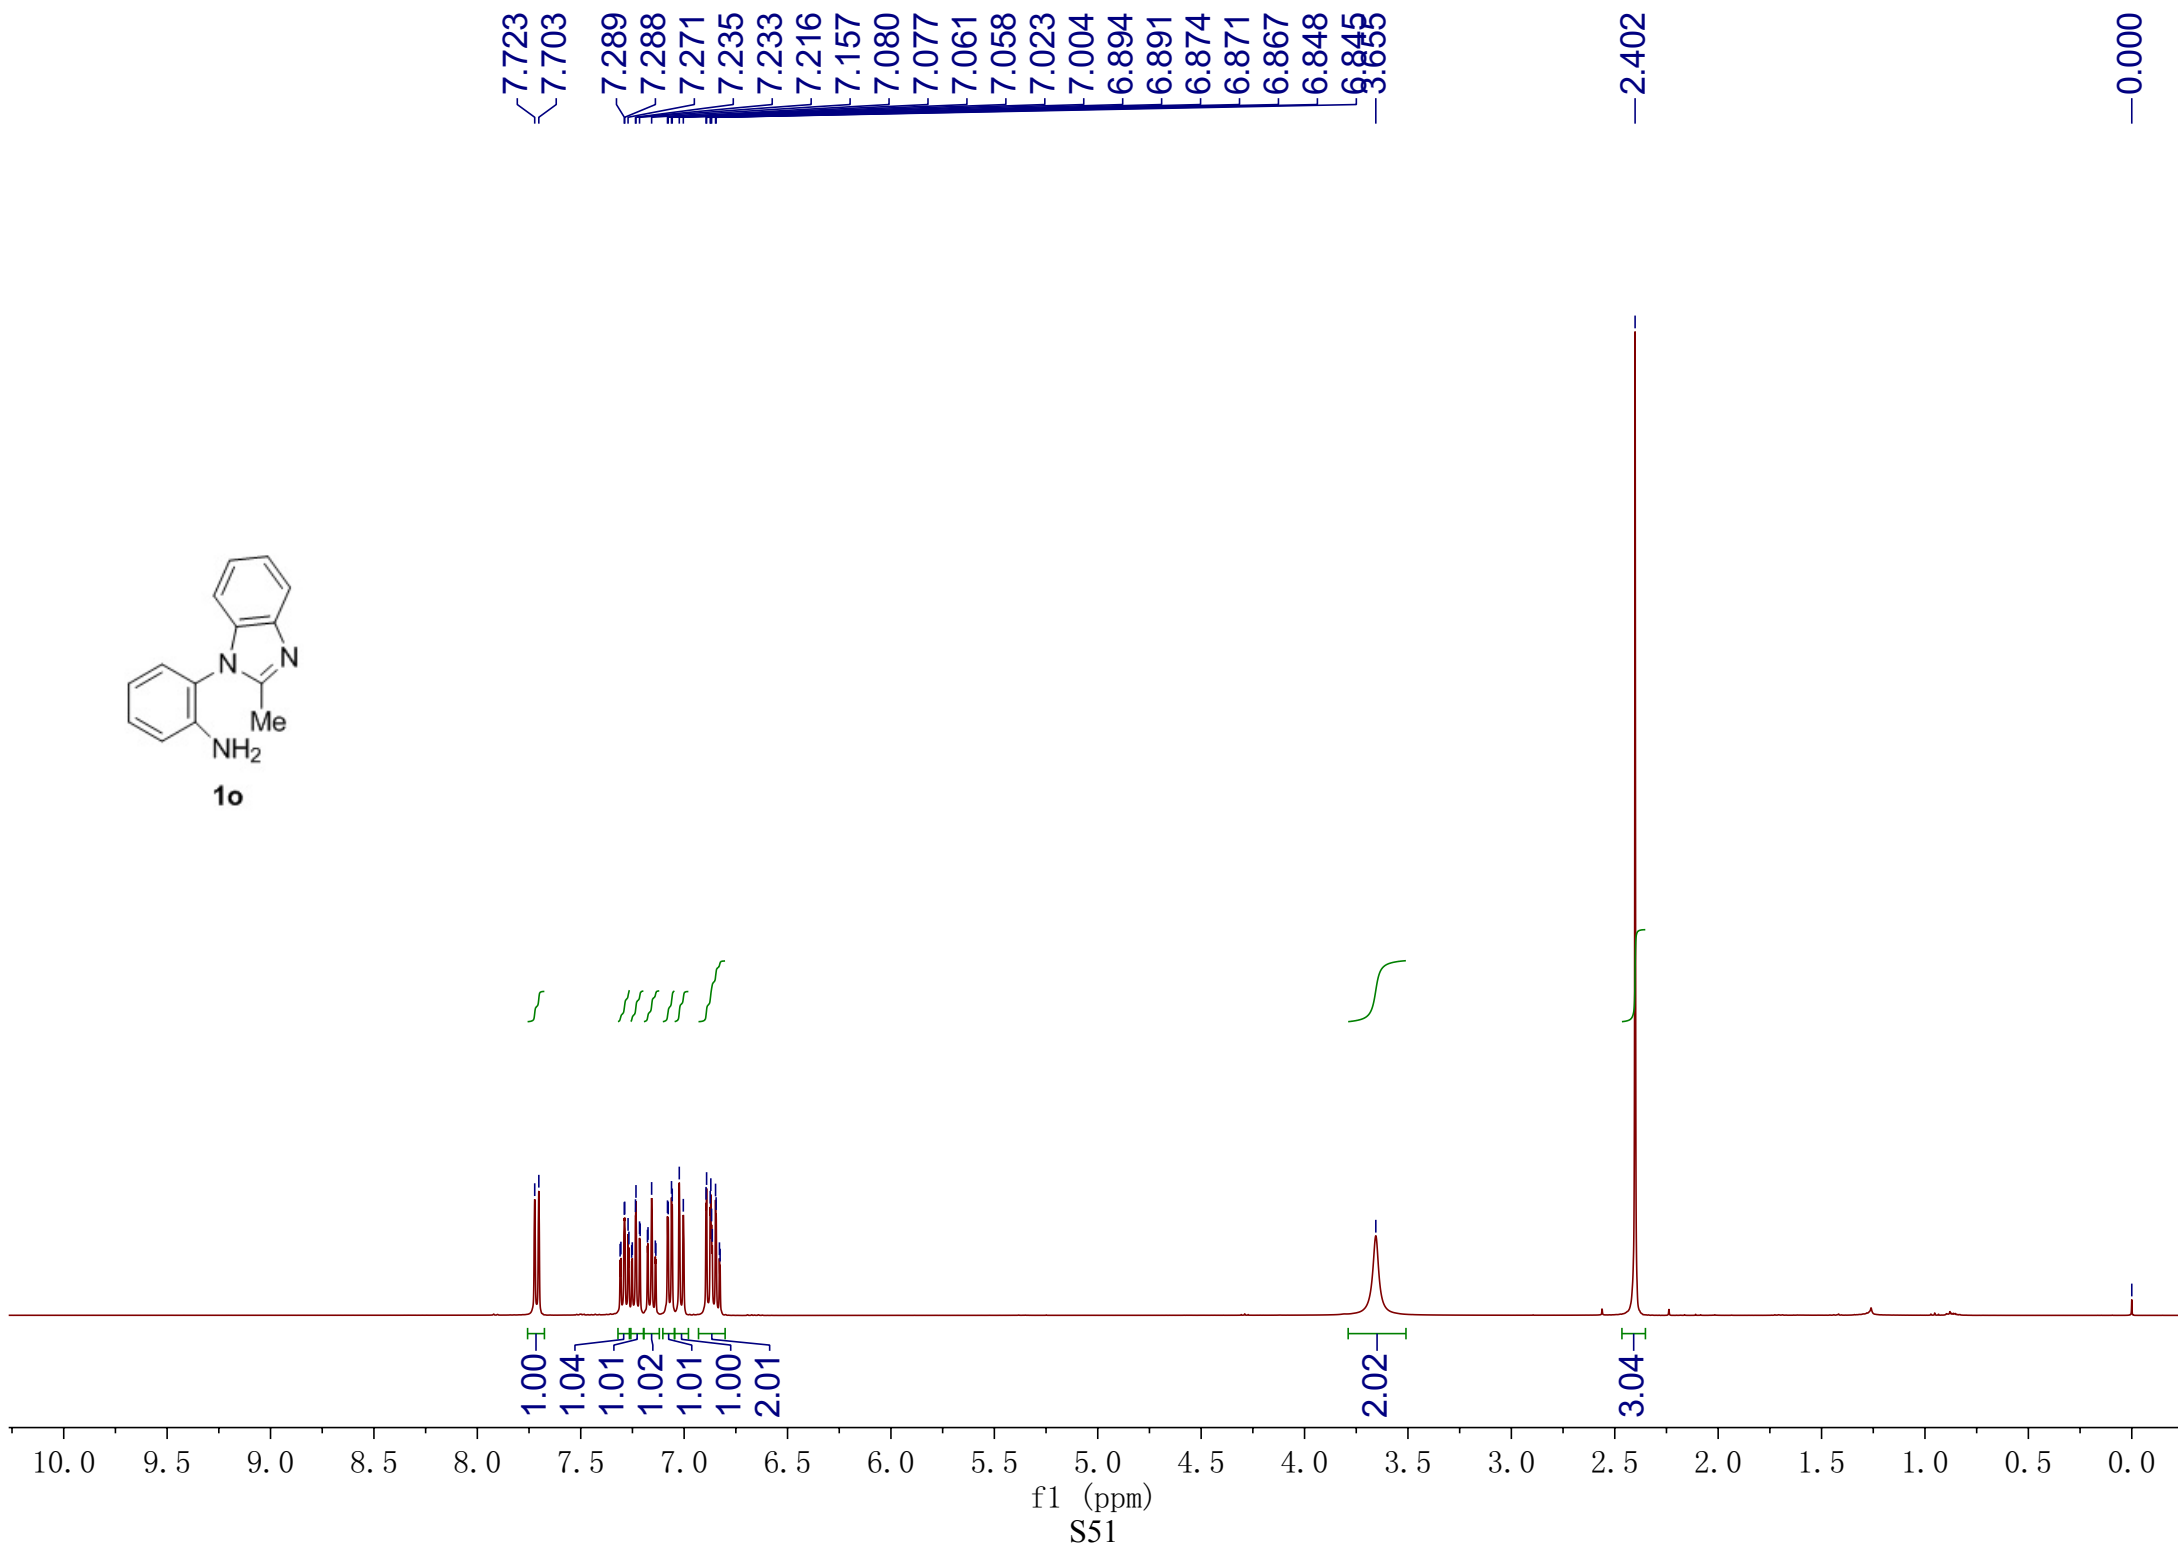

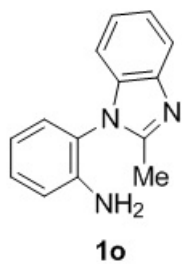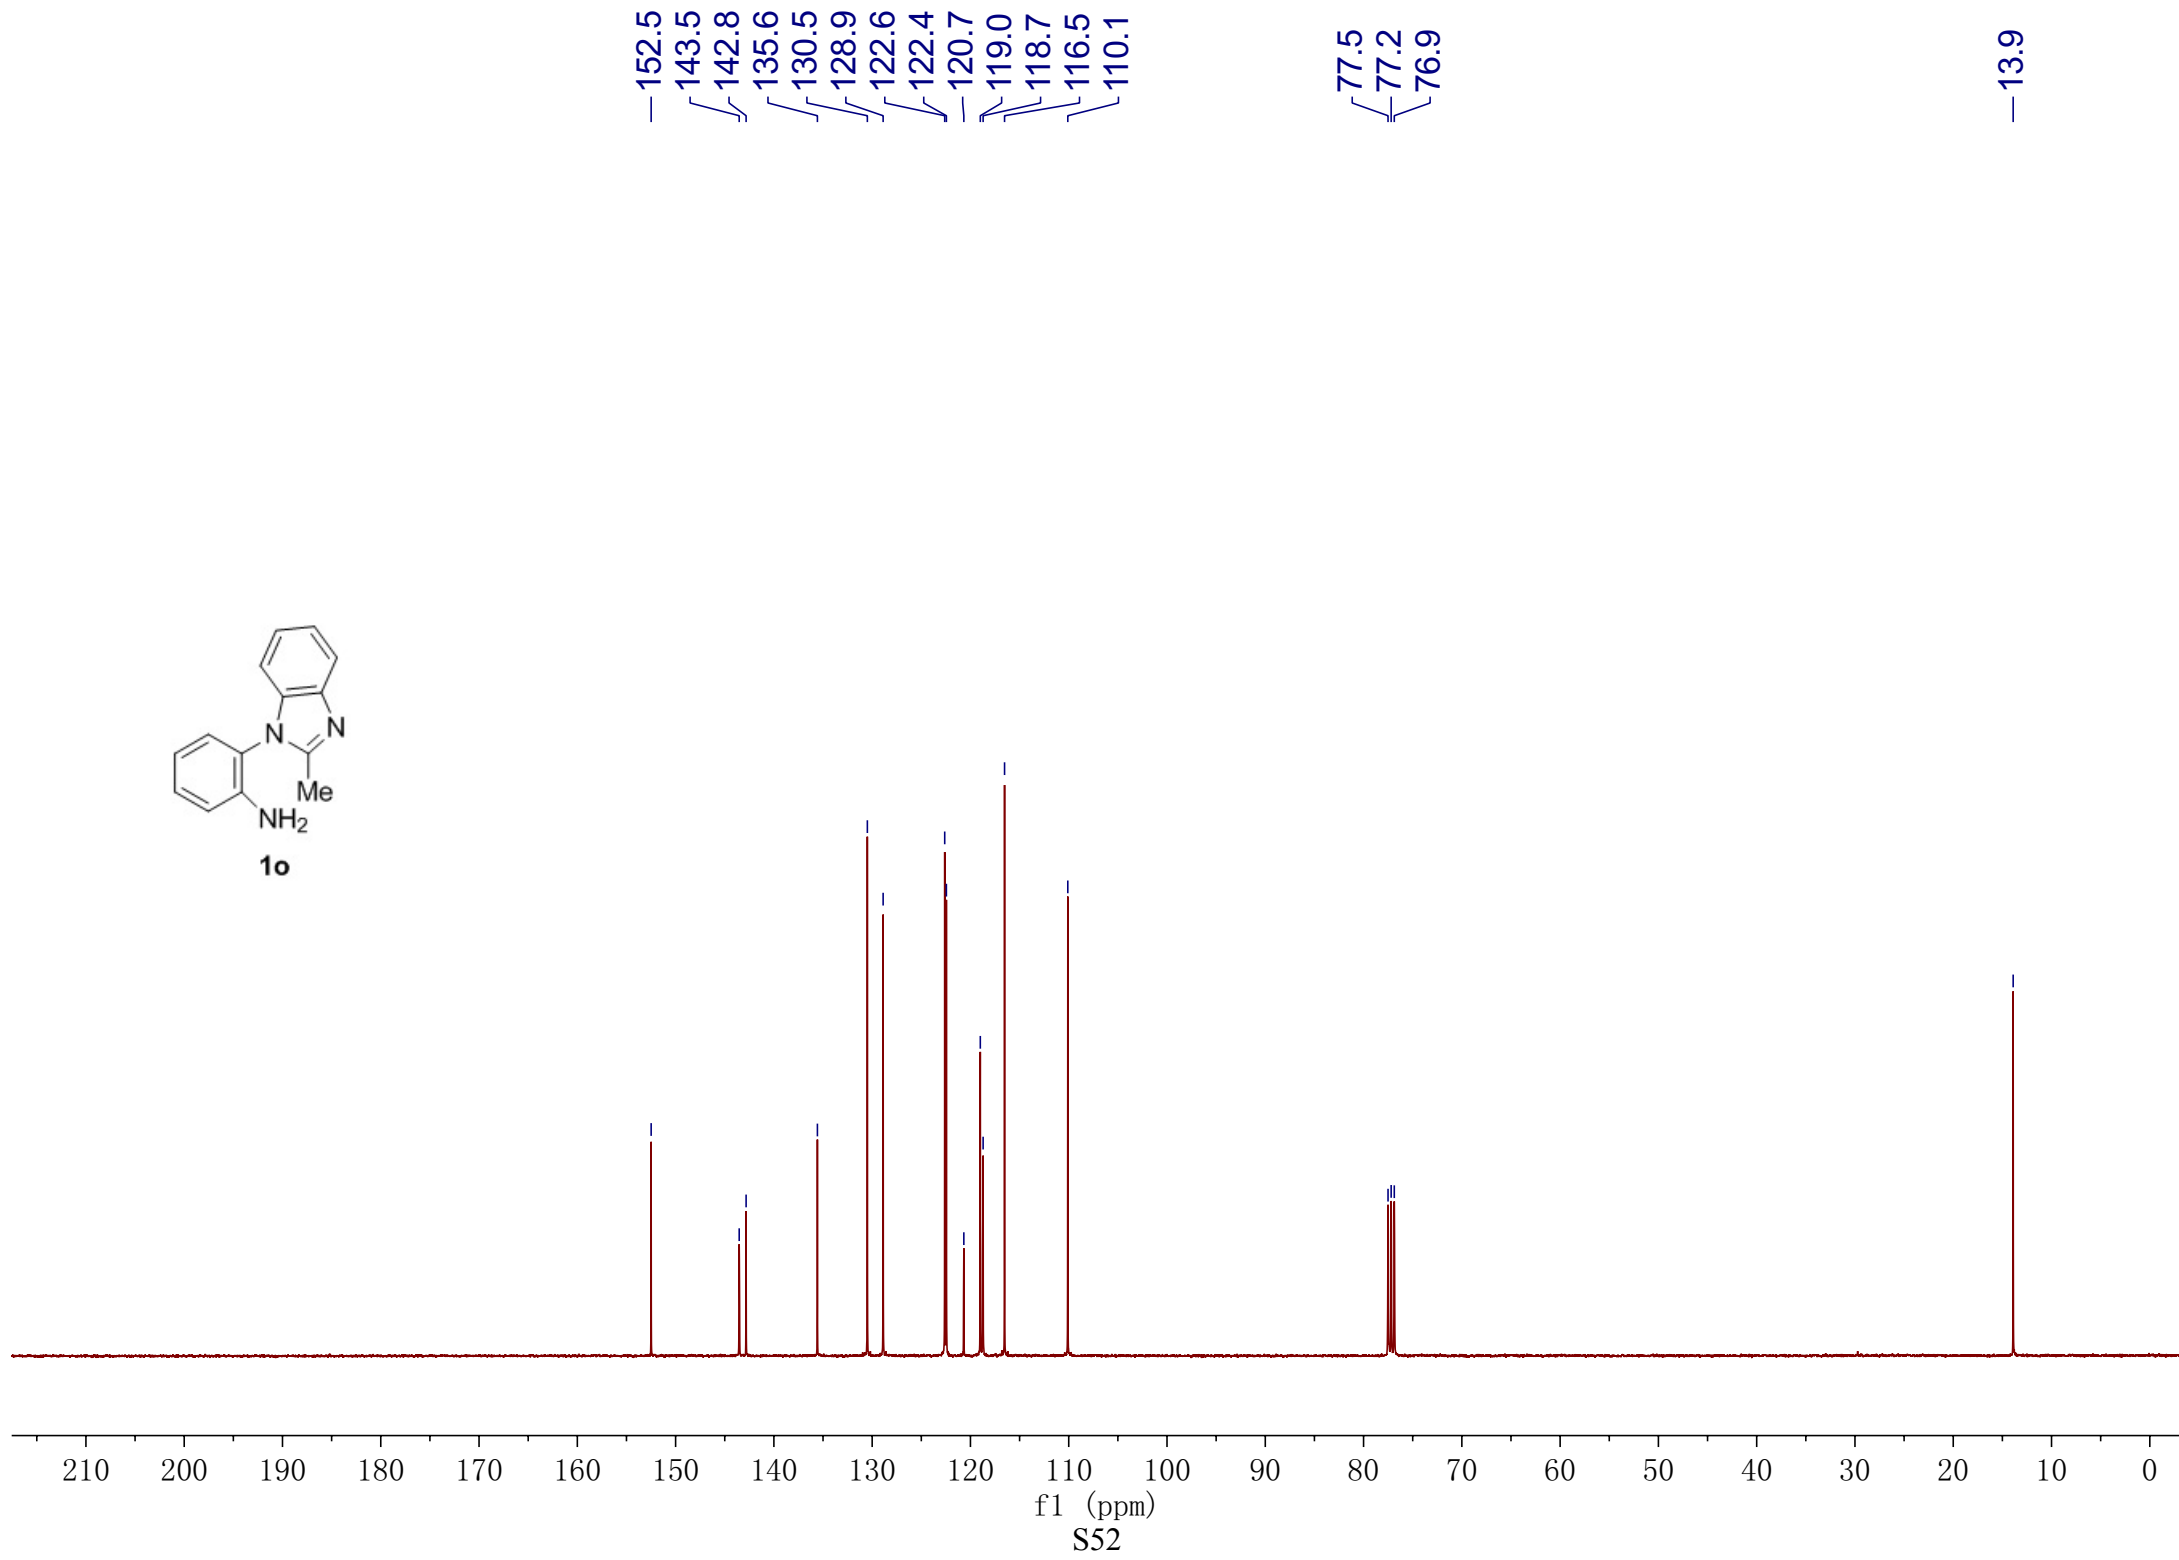



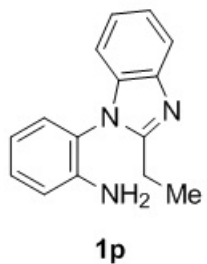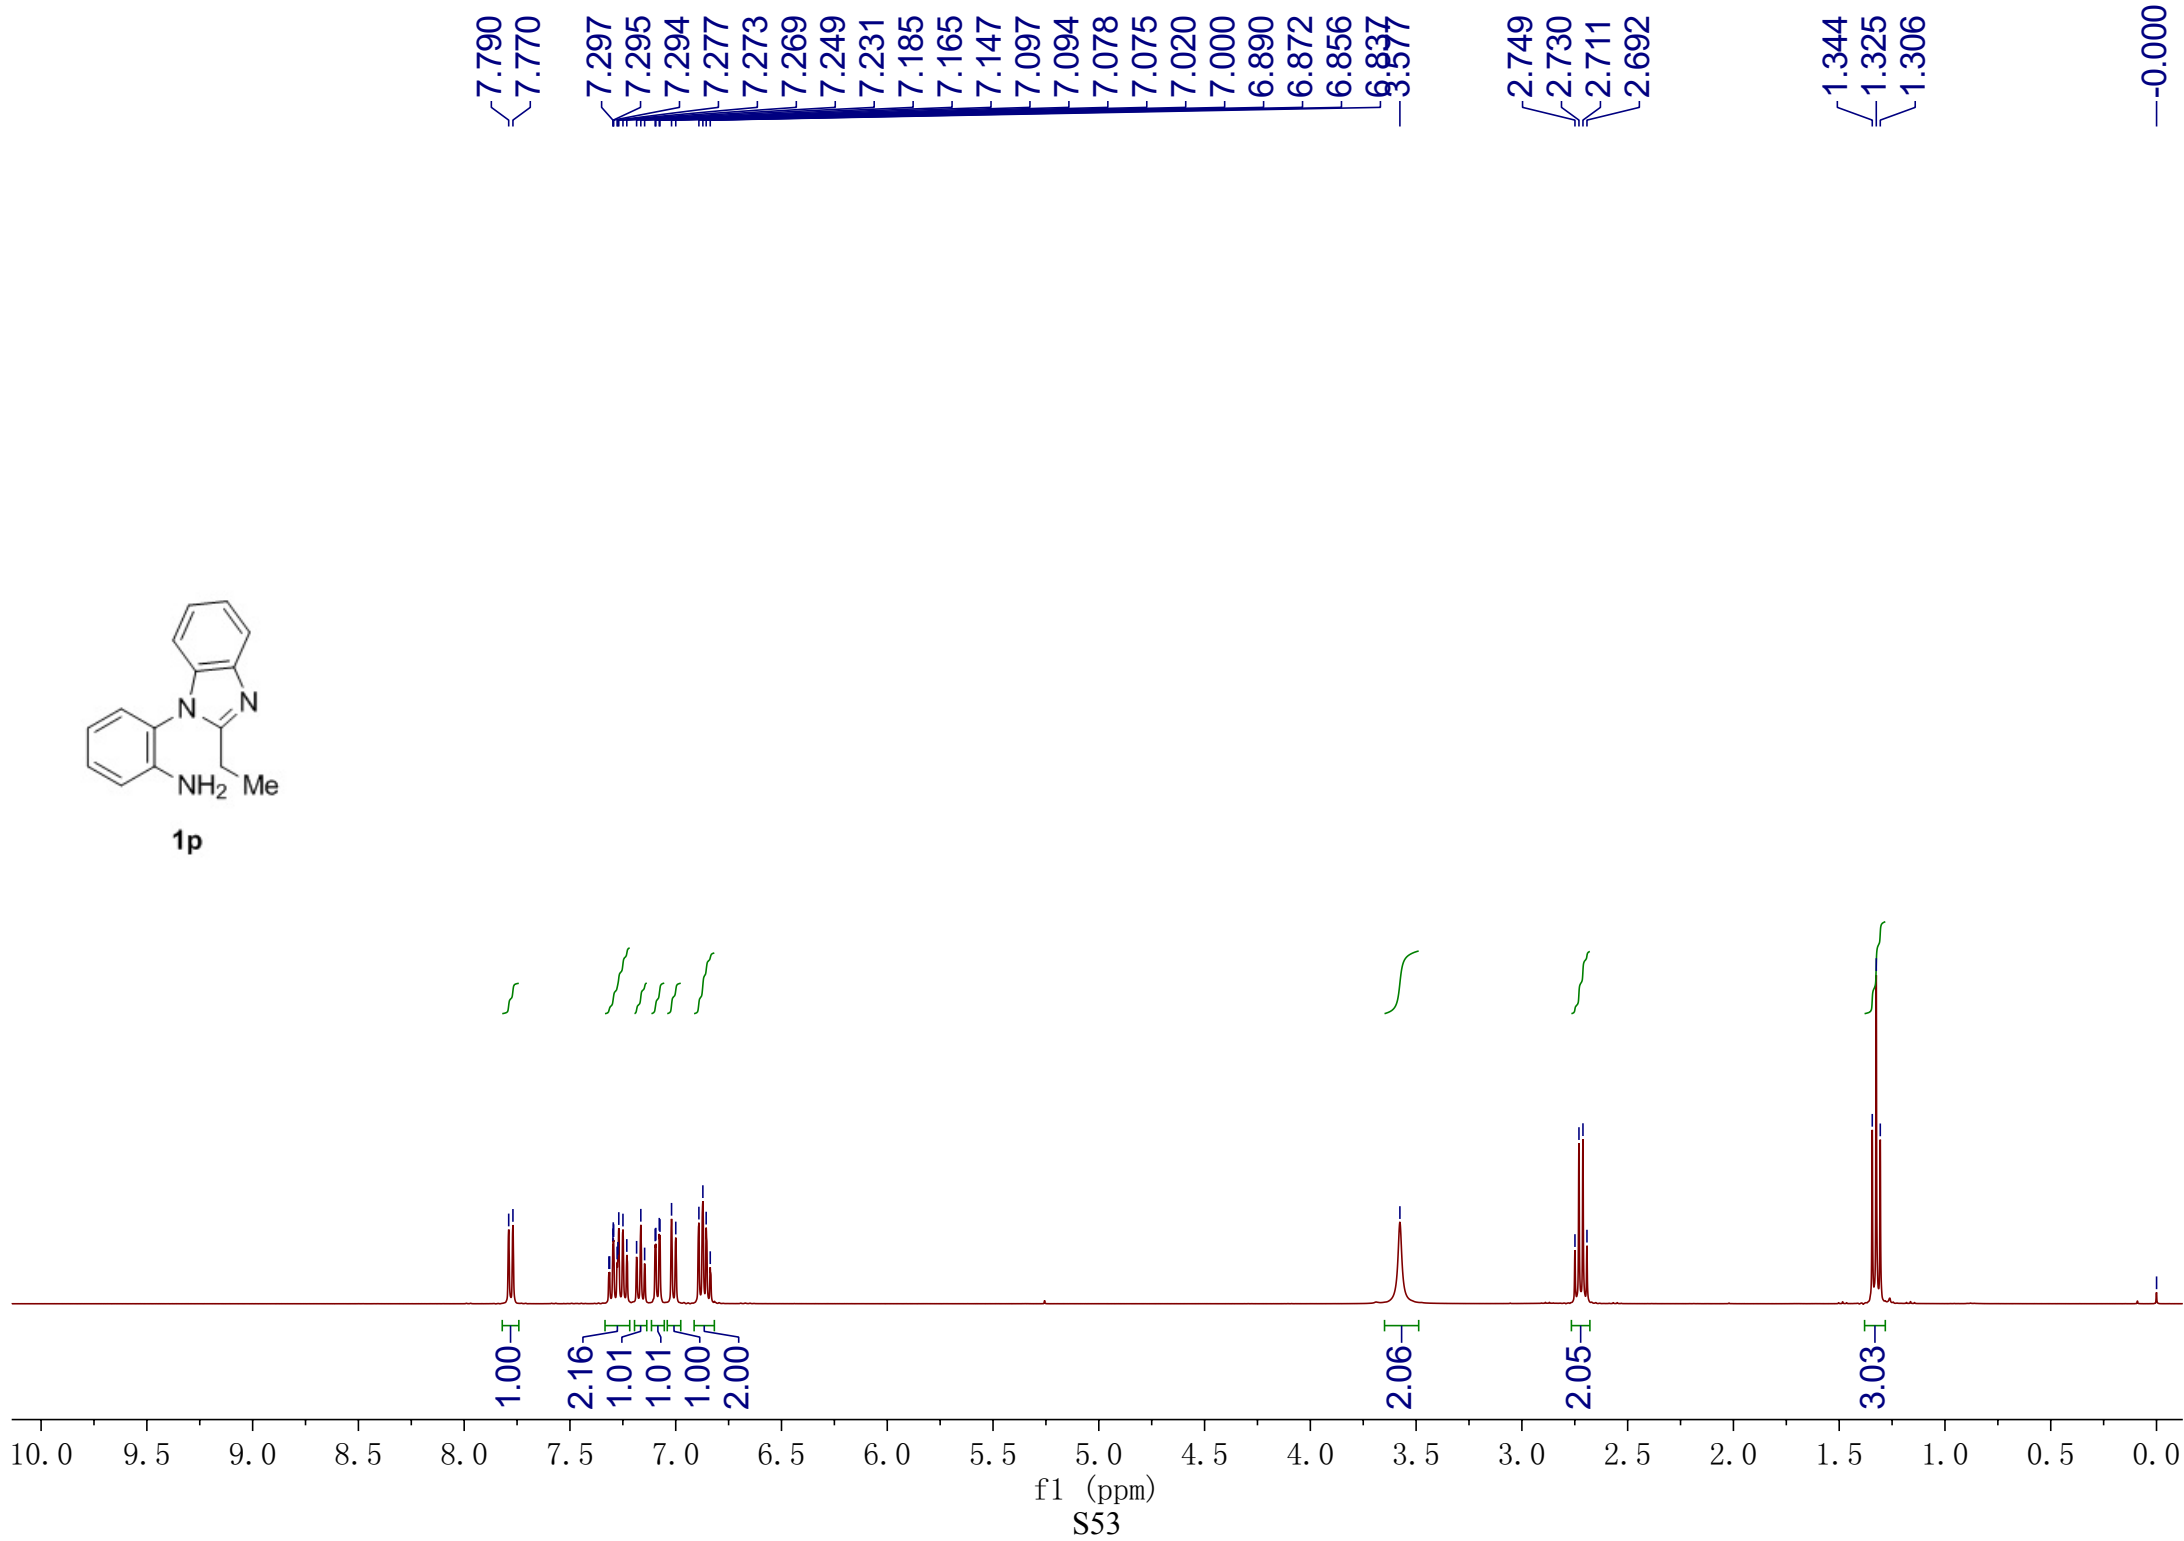

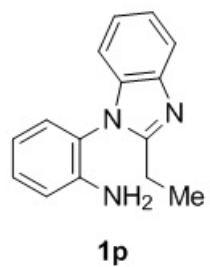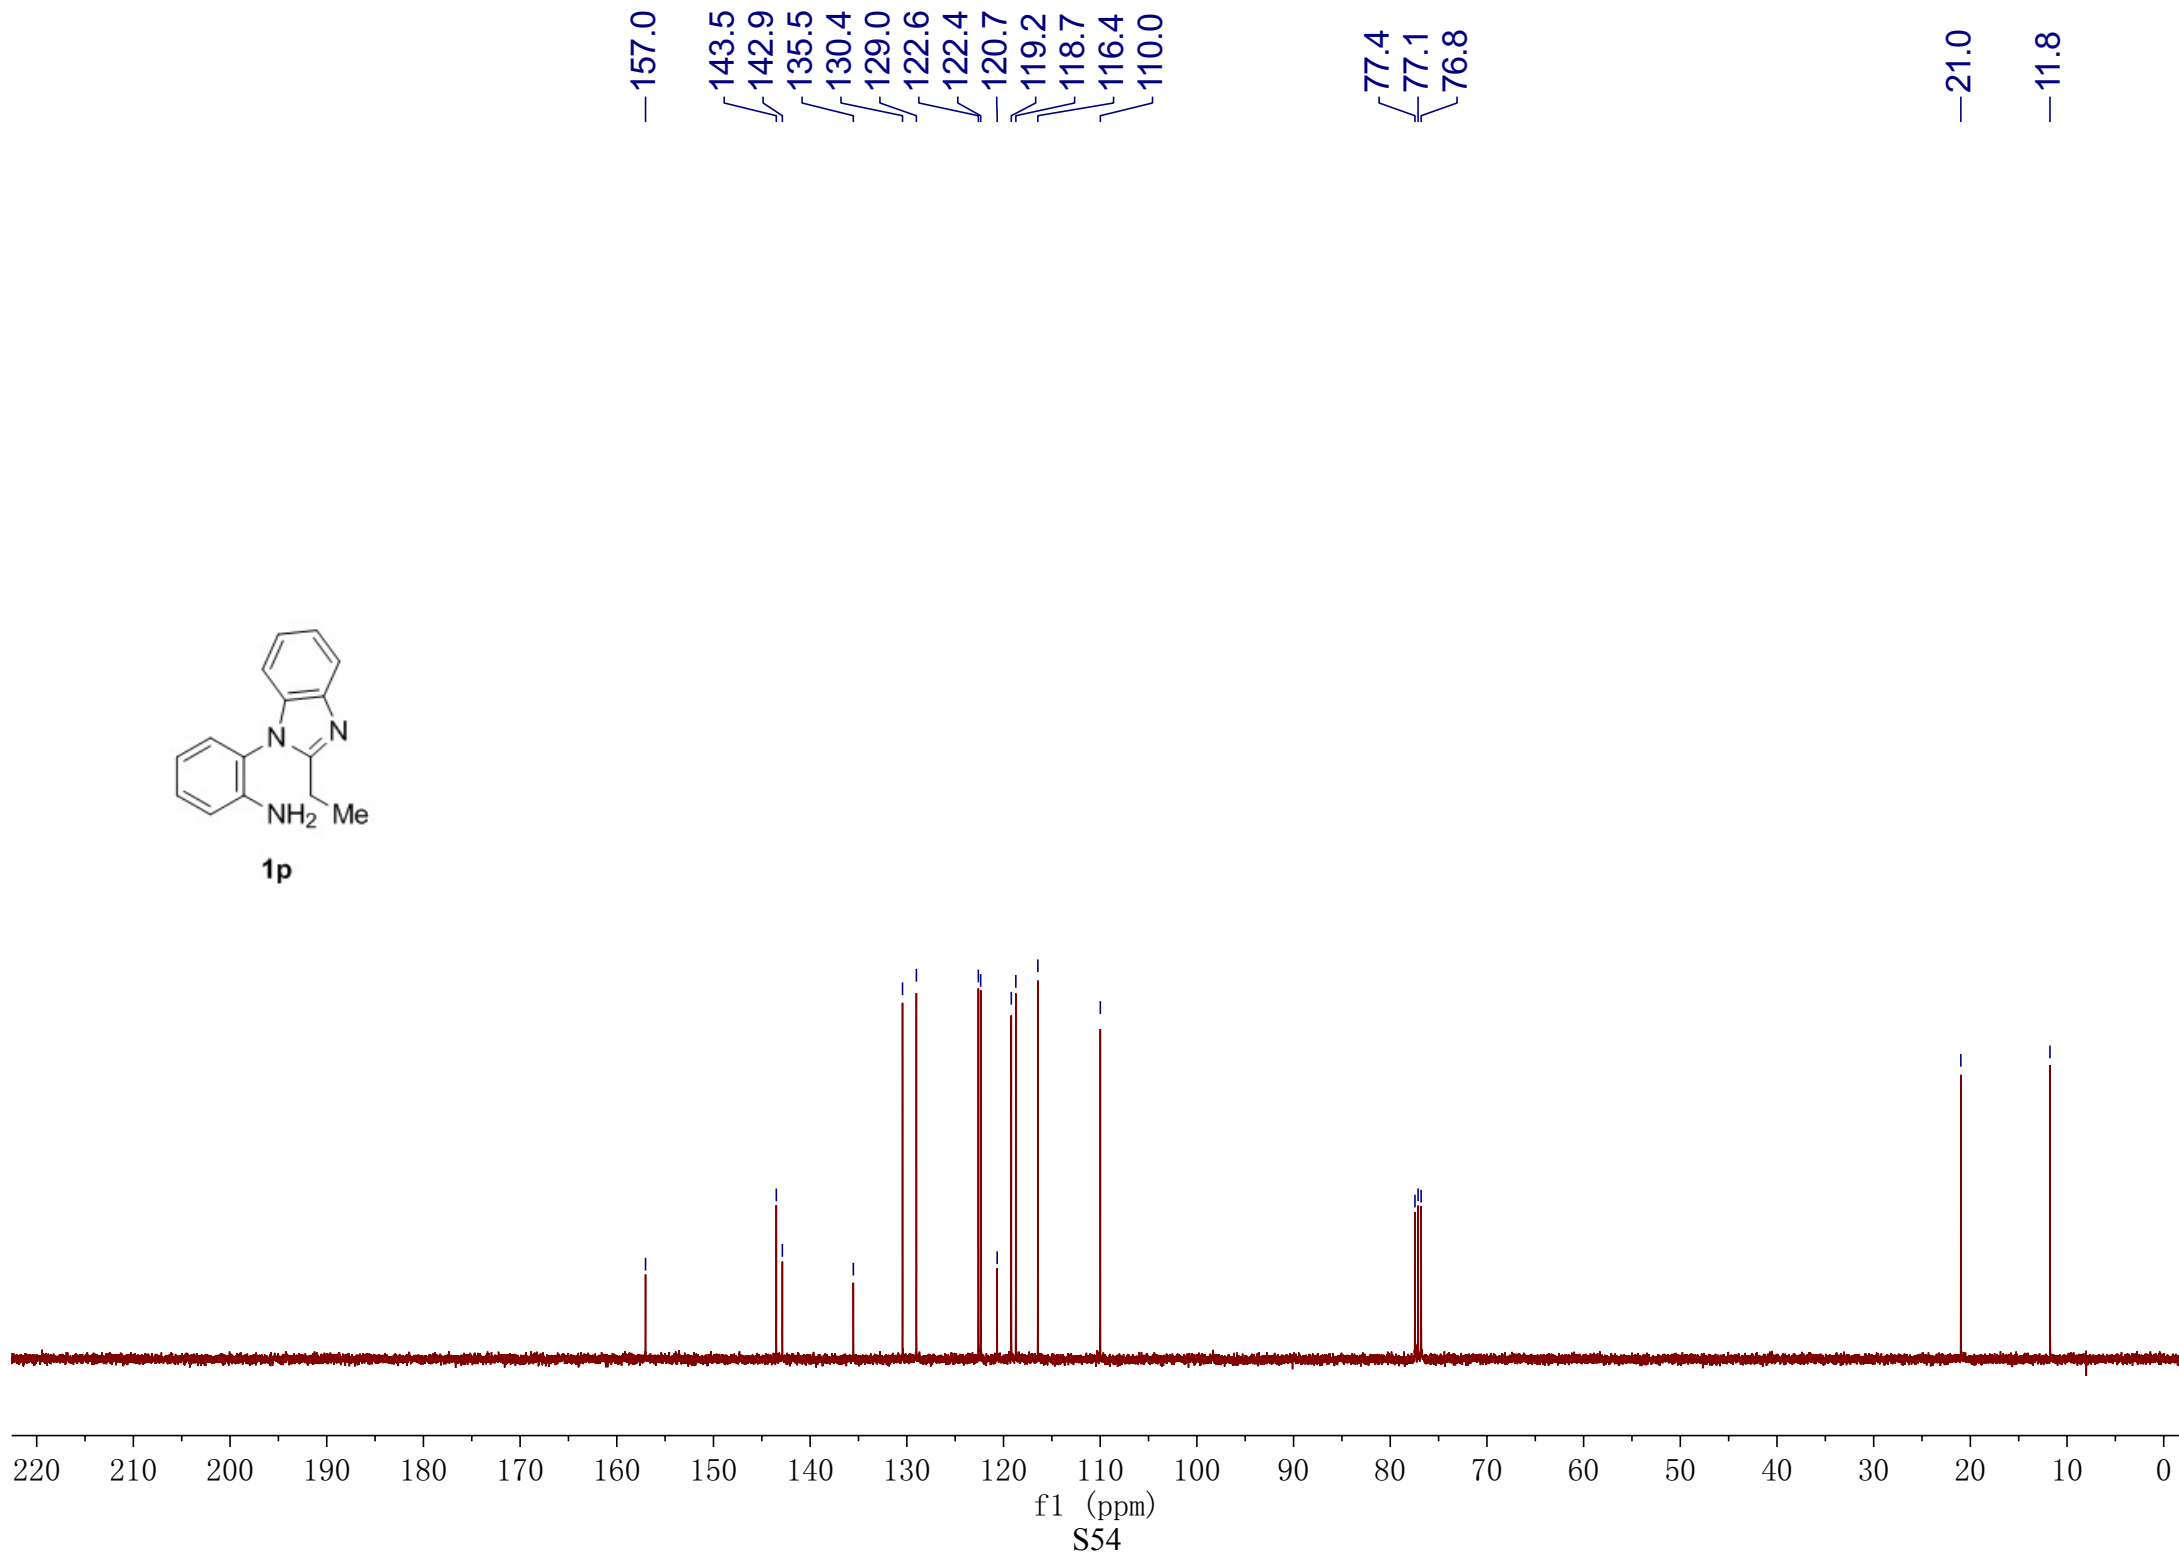

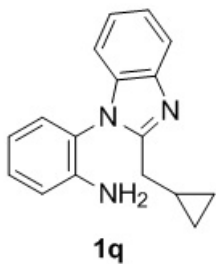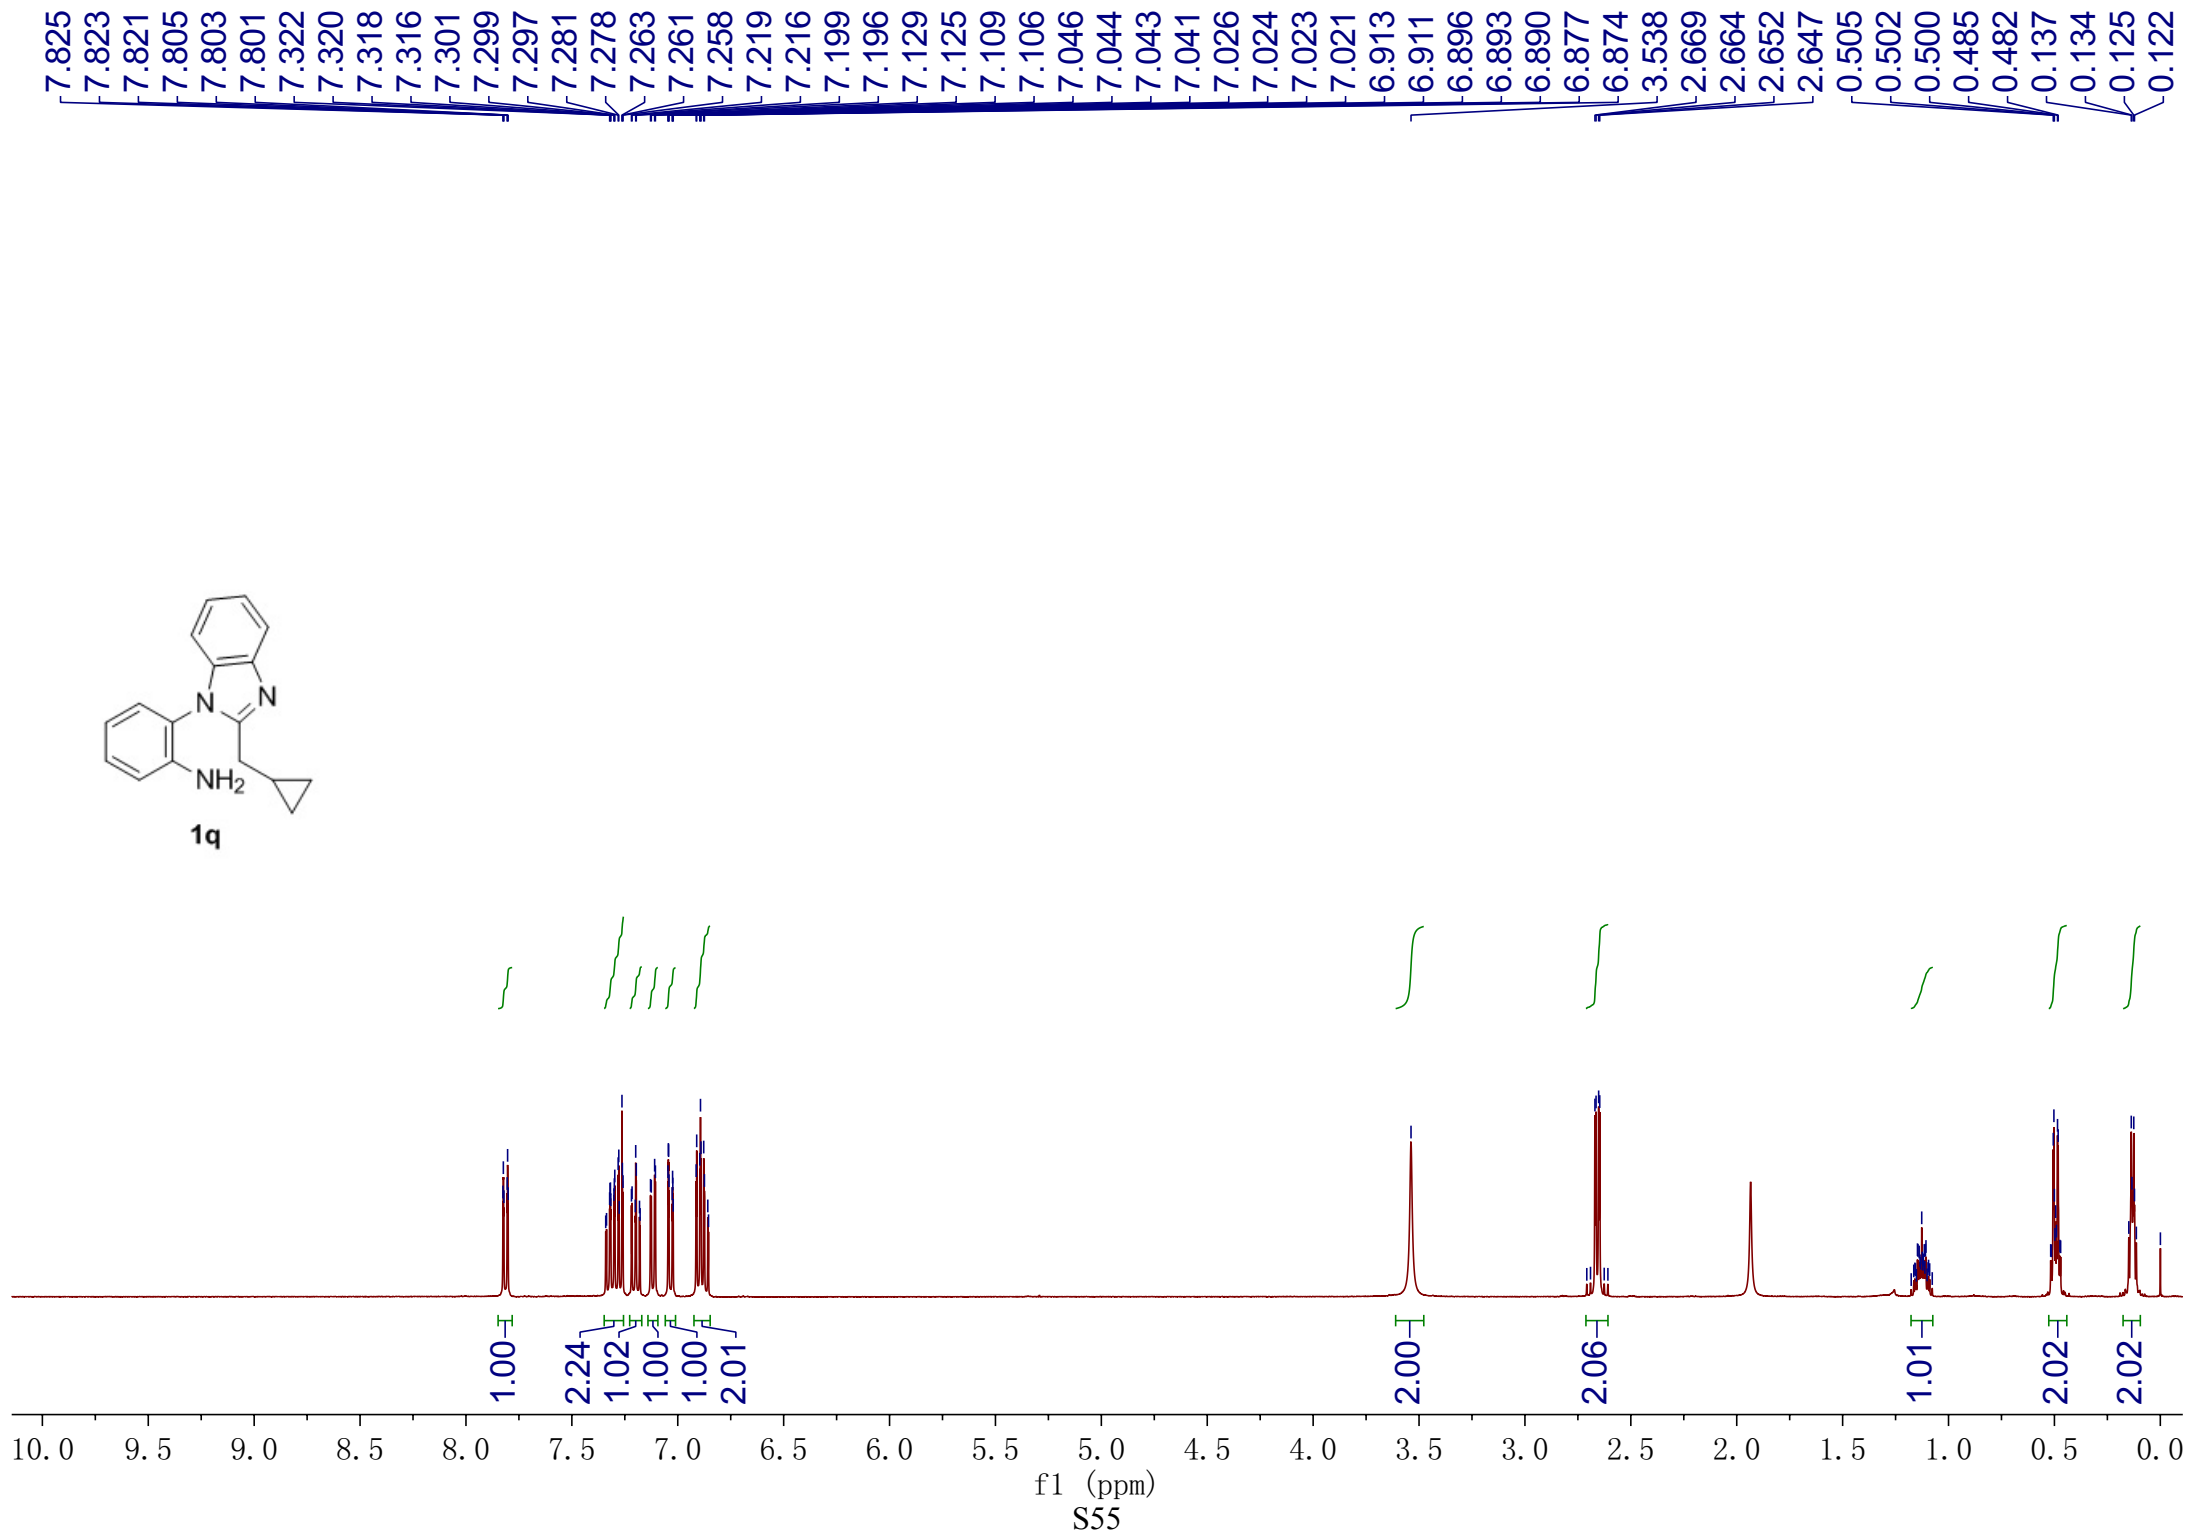

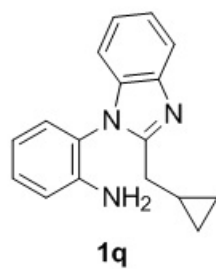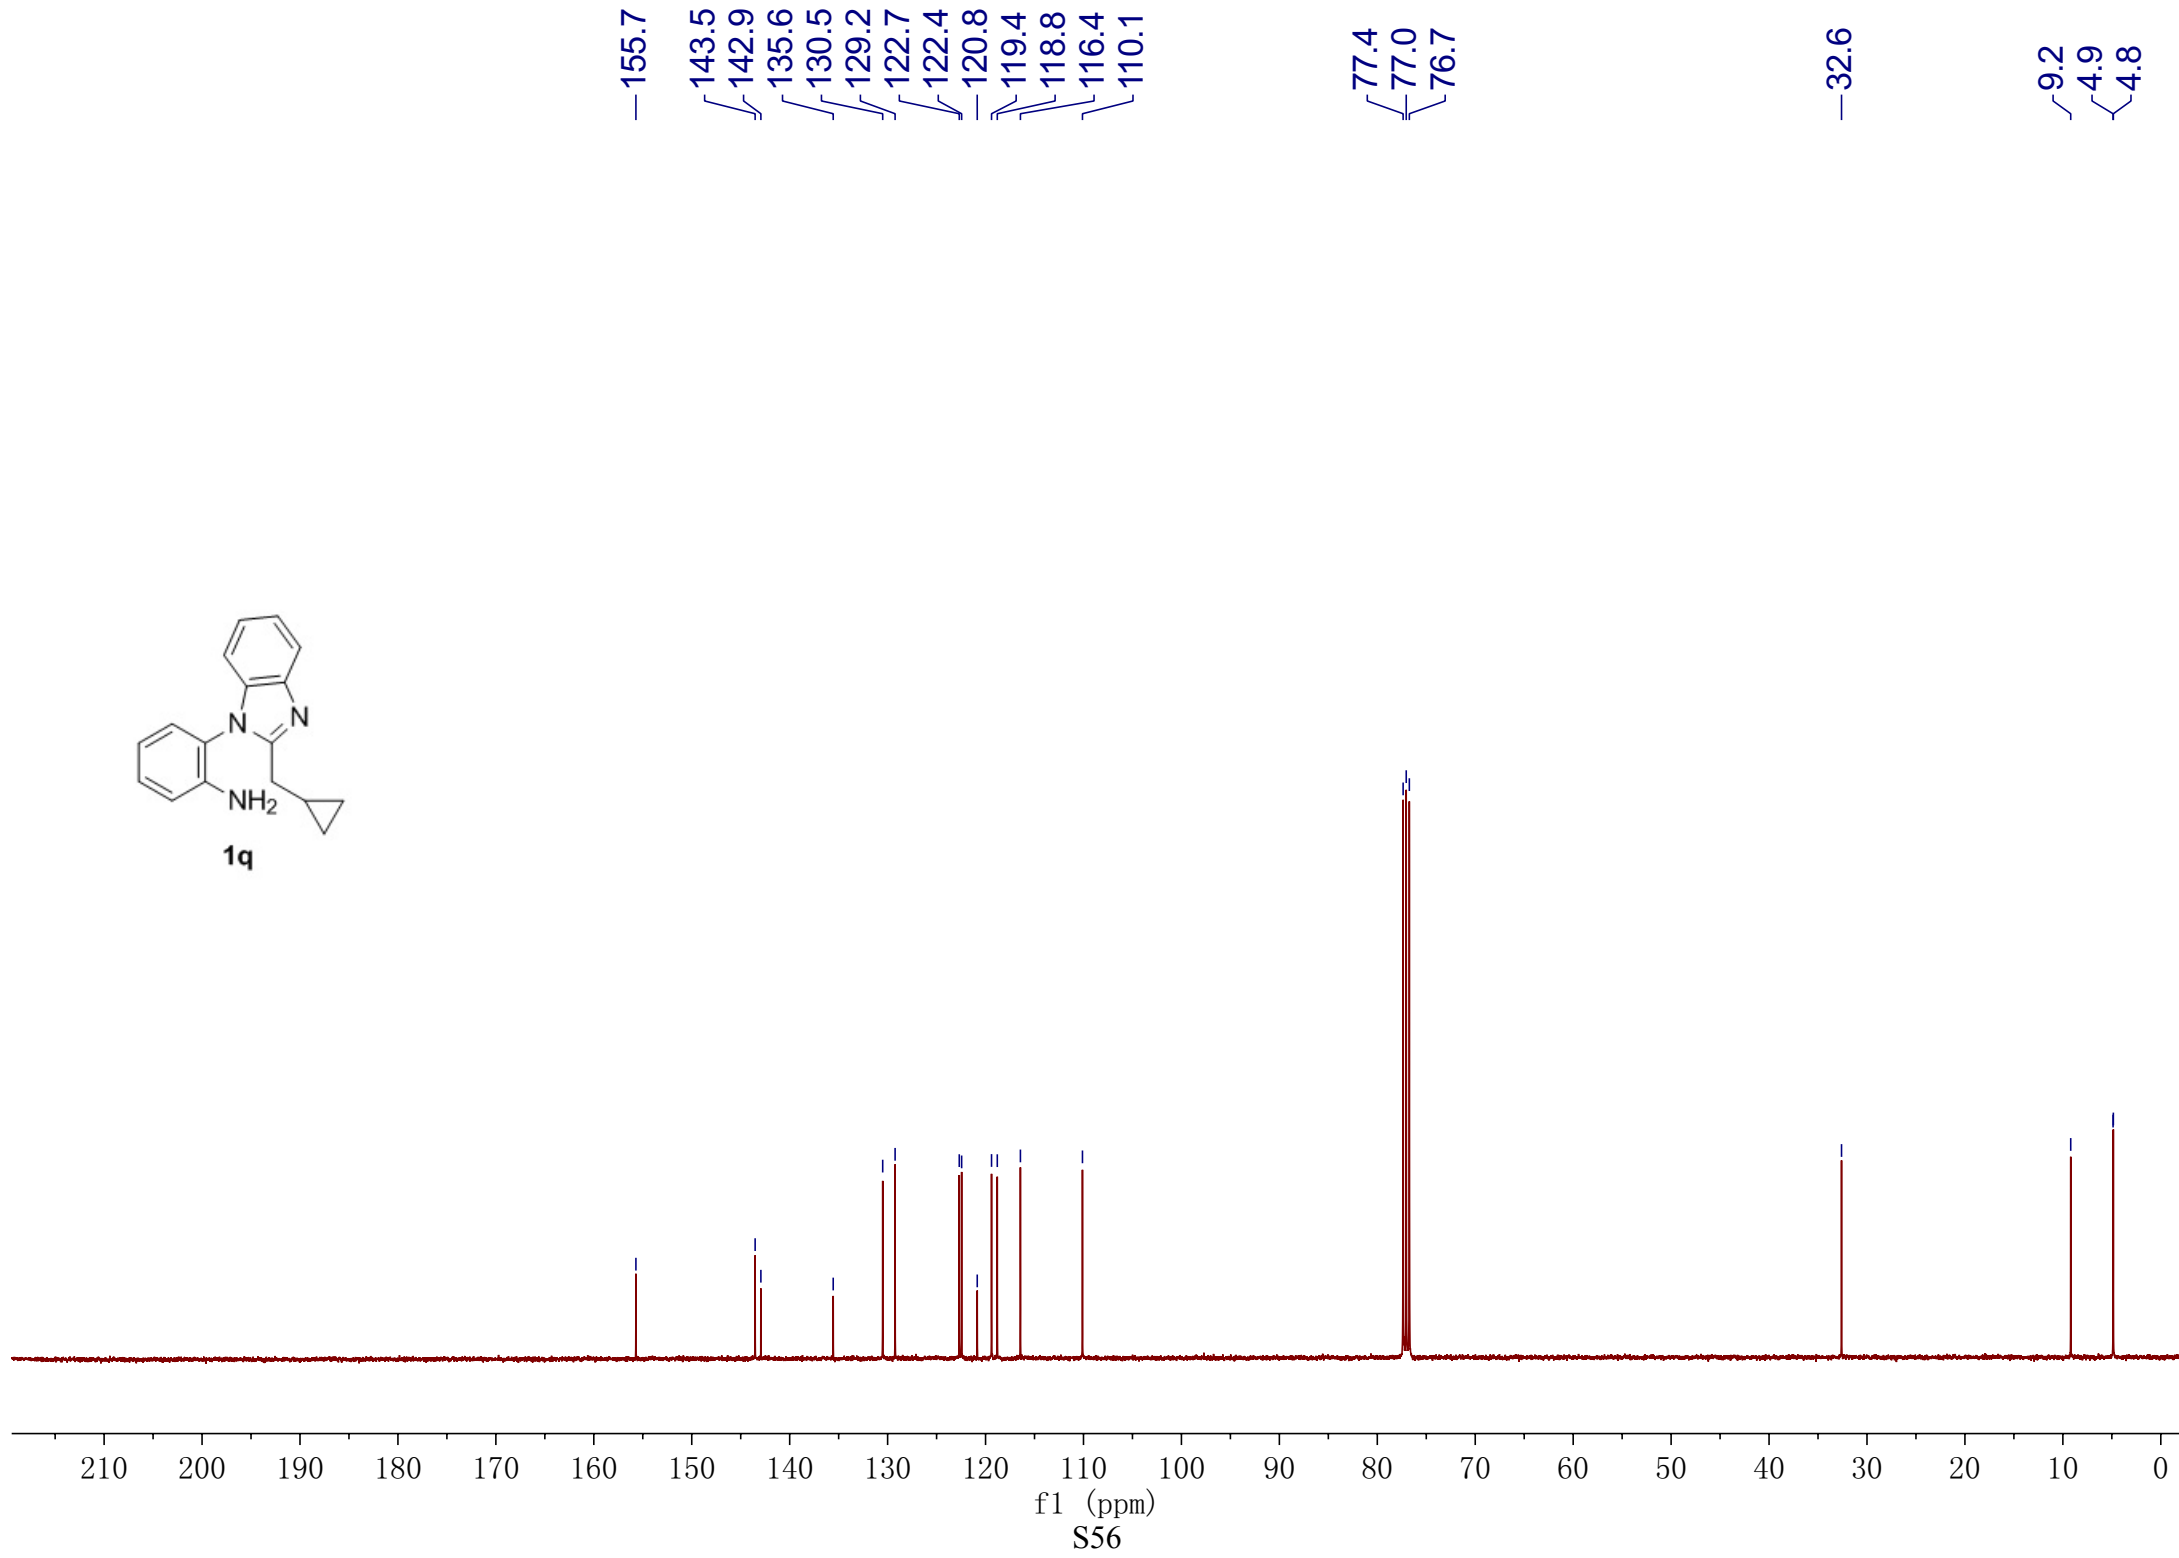

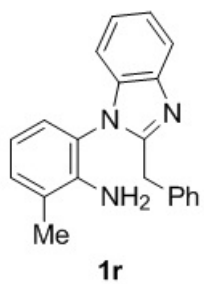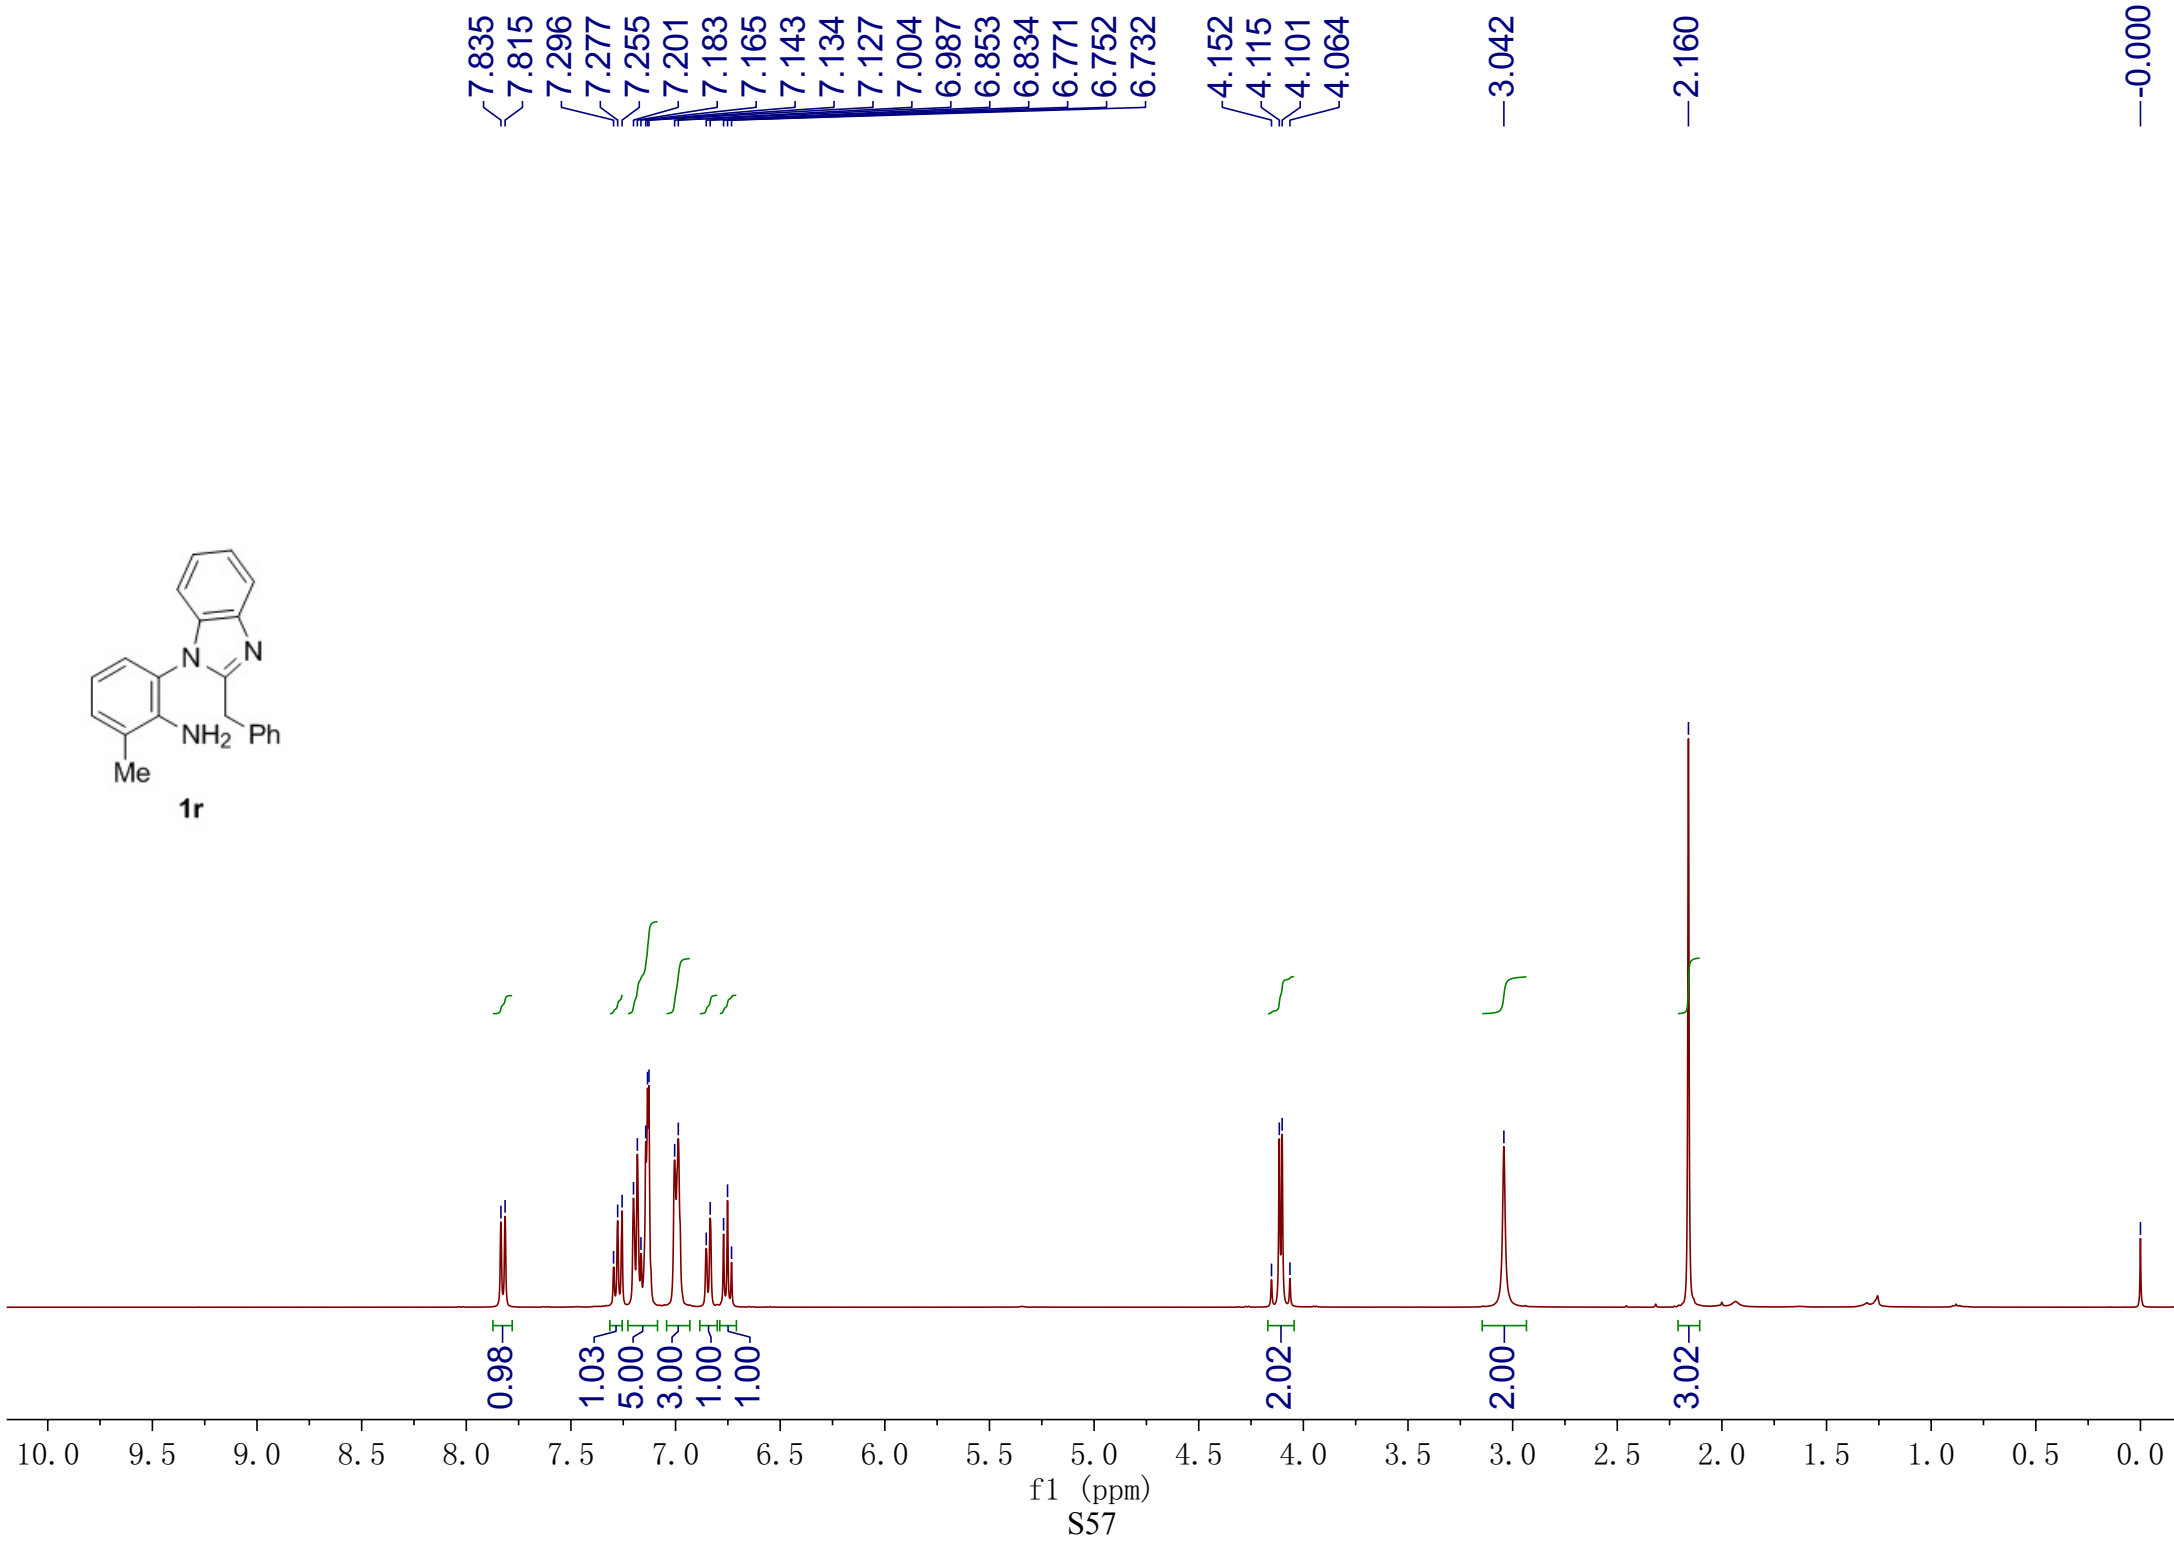

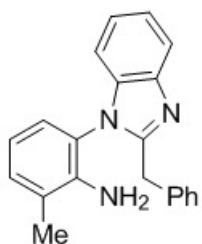

**1r**

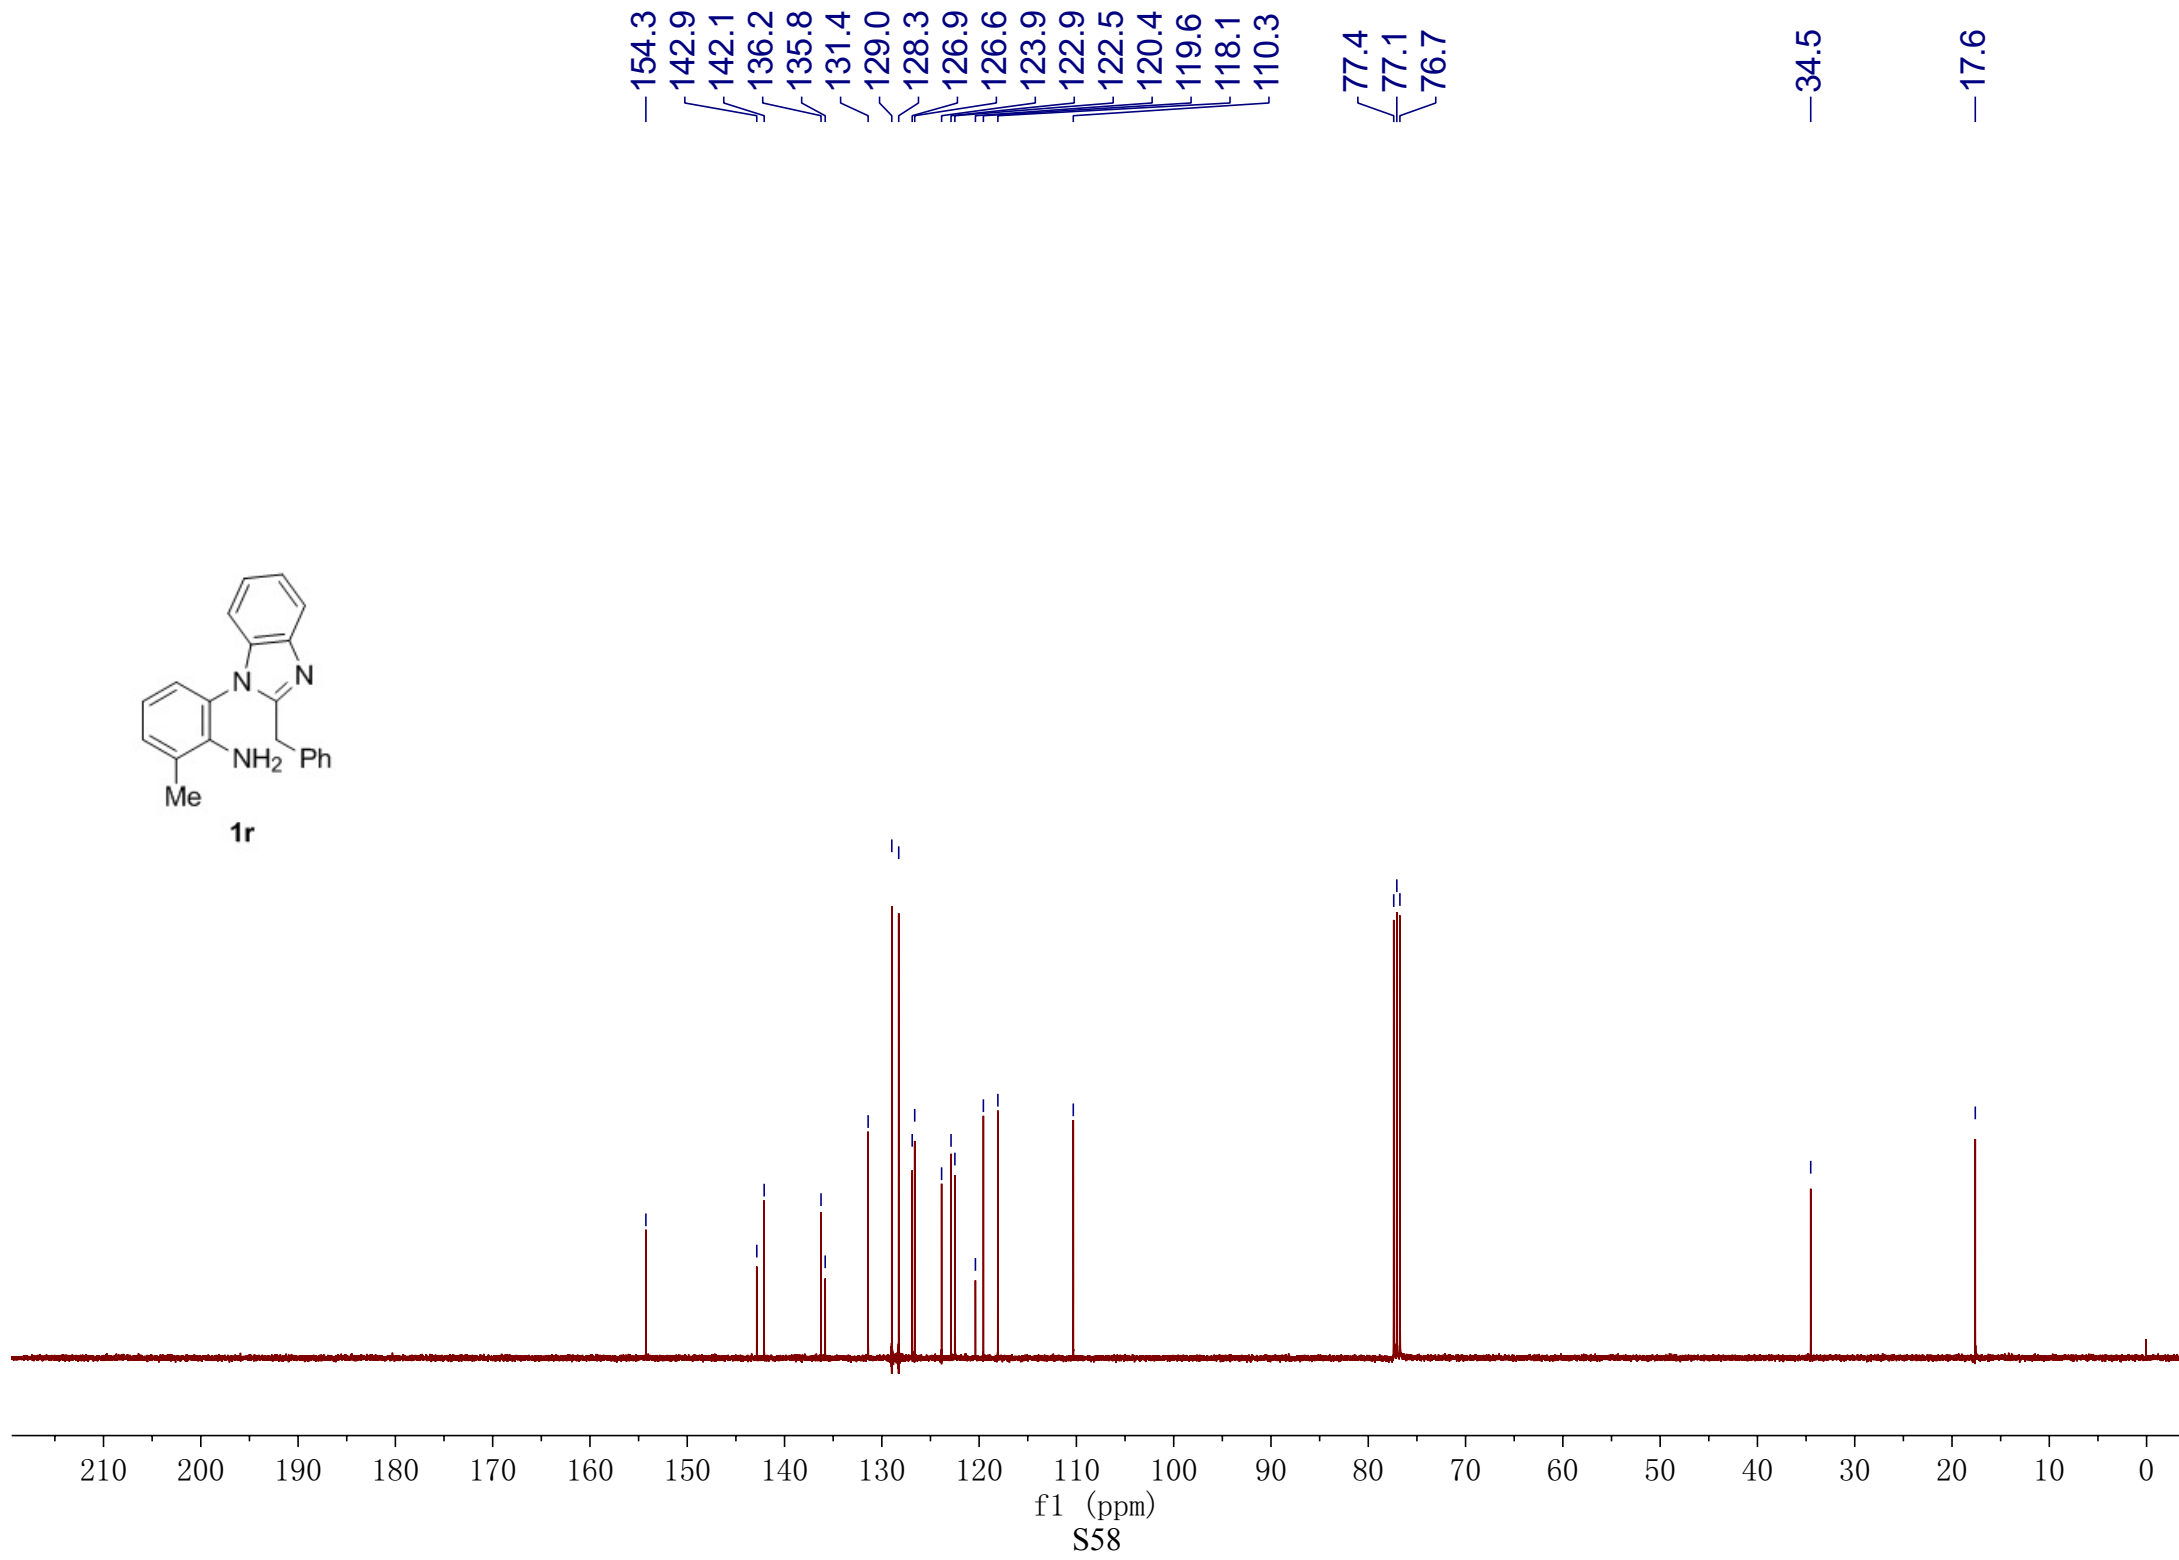

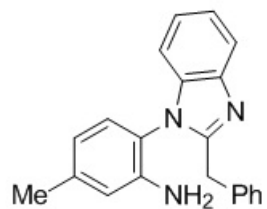

**1s**

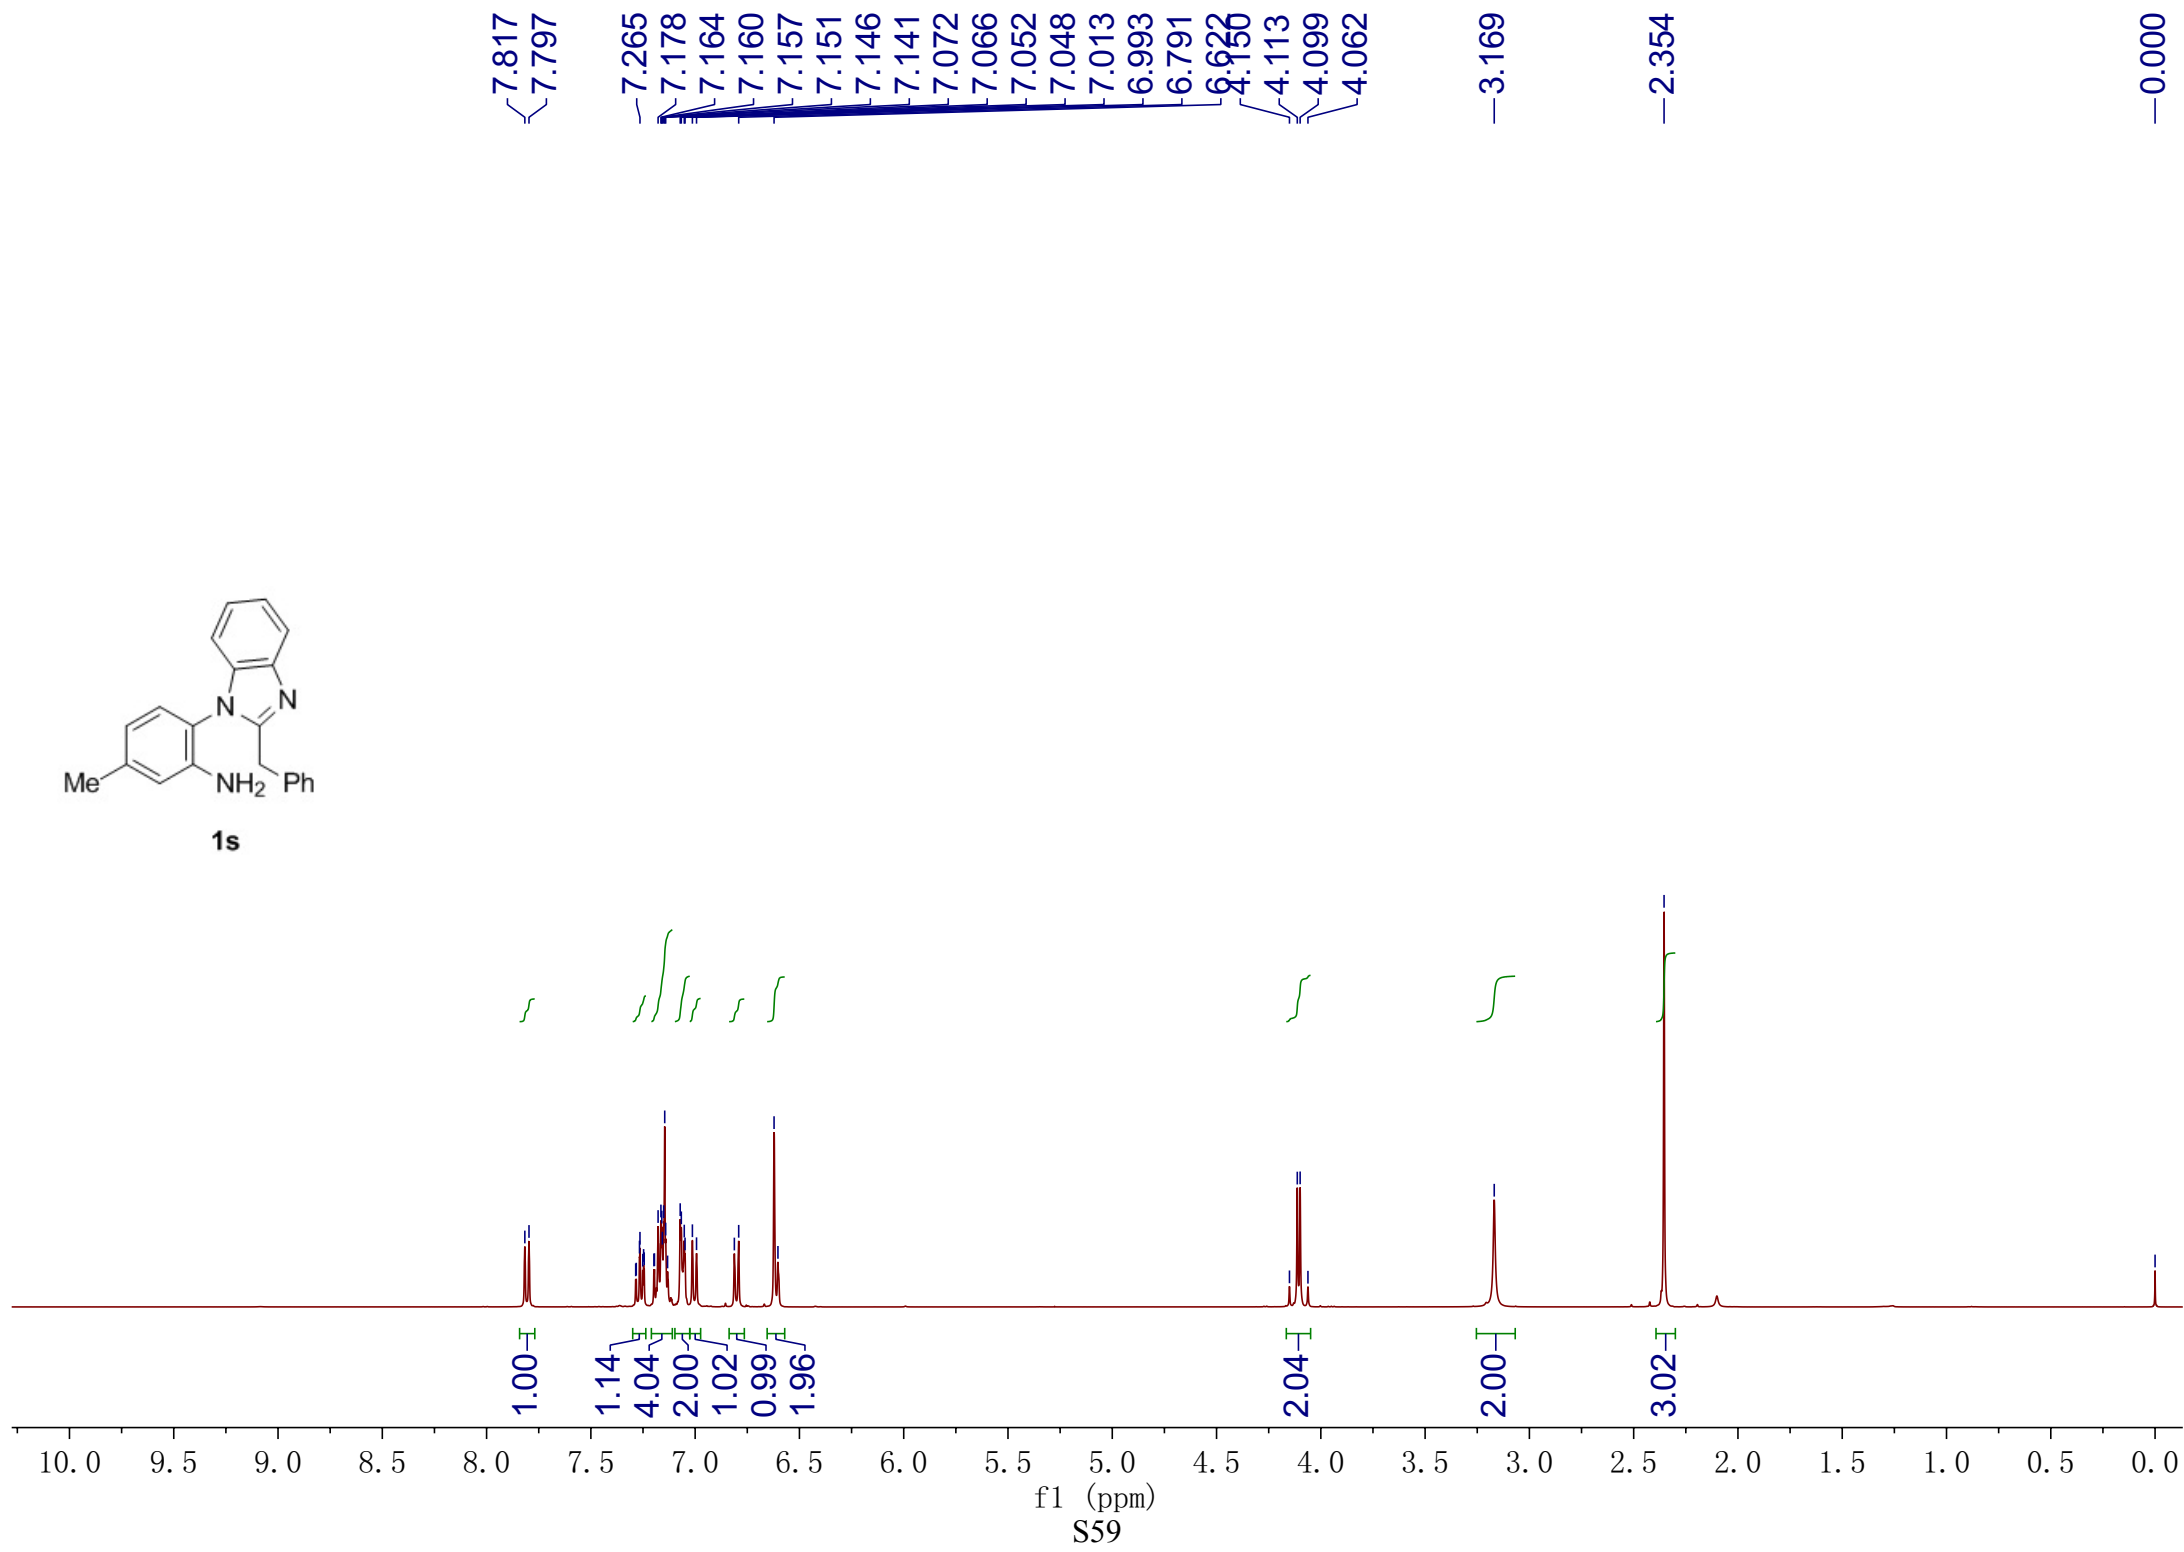

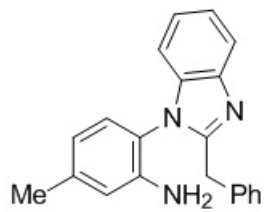

**1s**

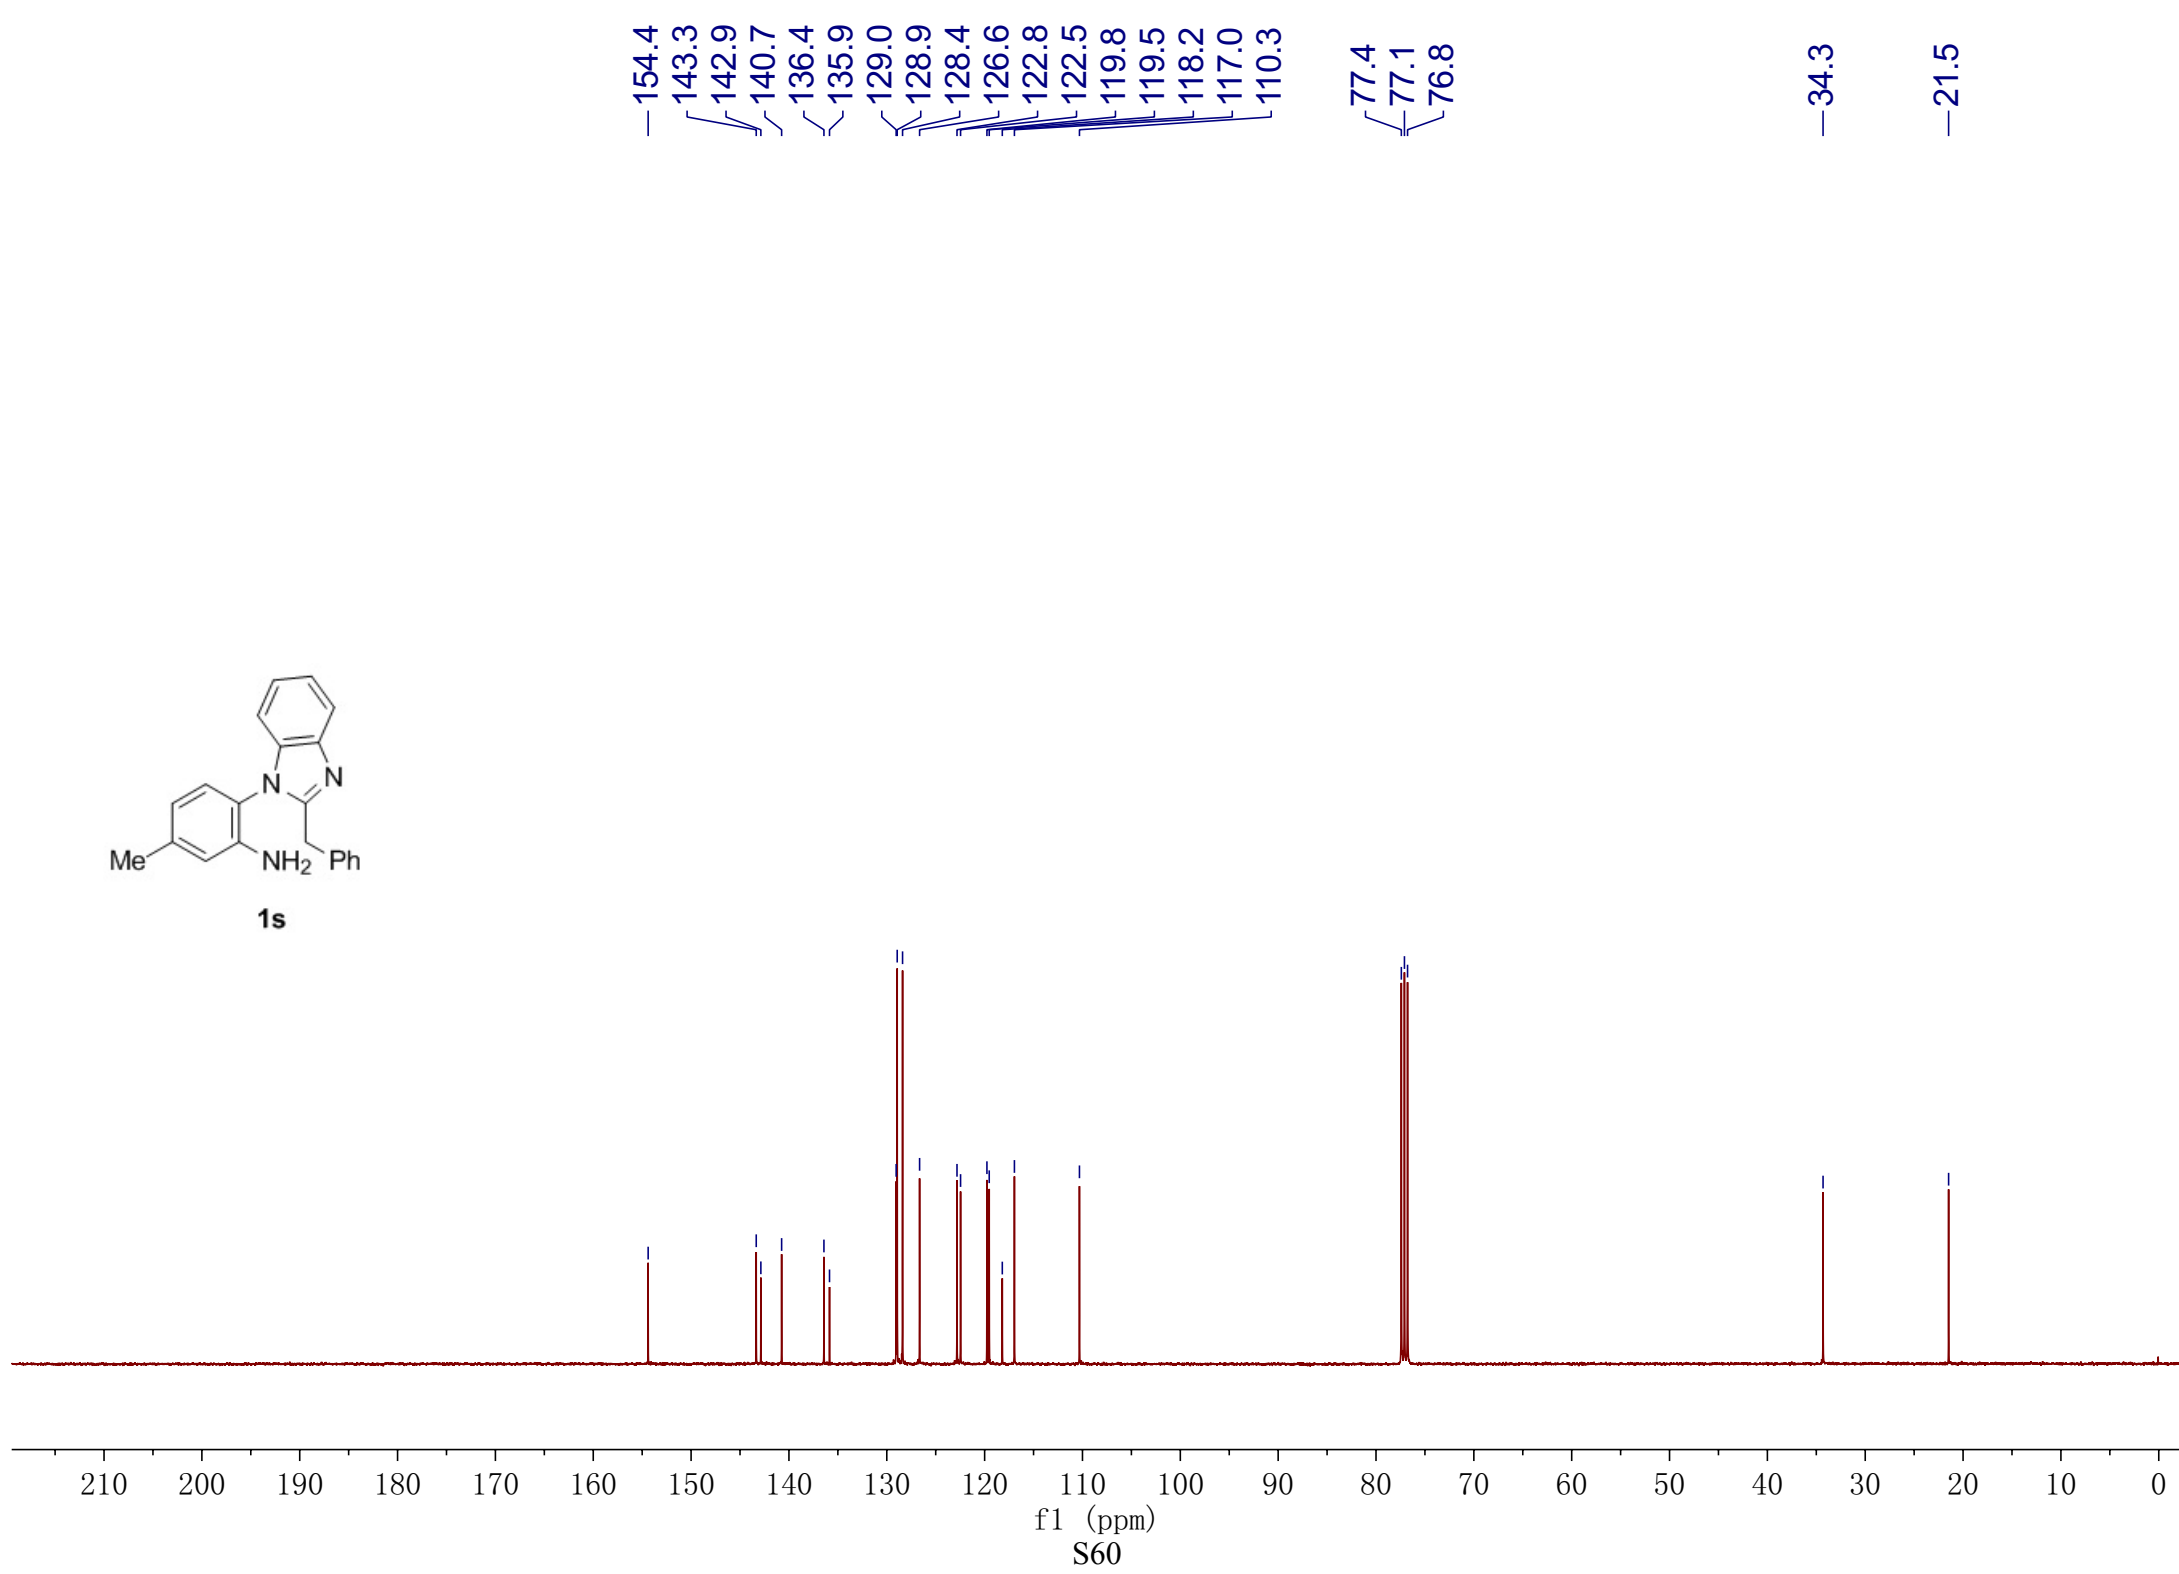



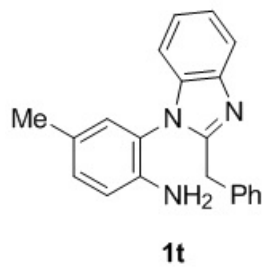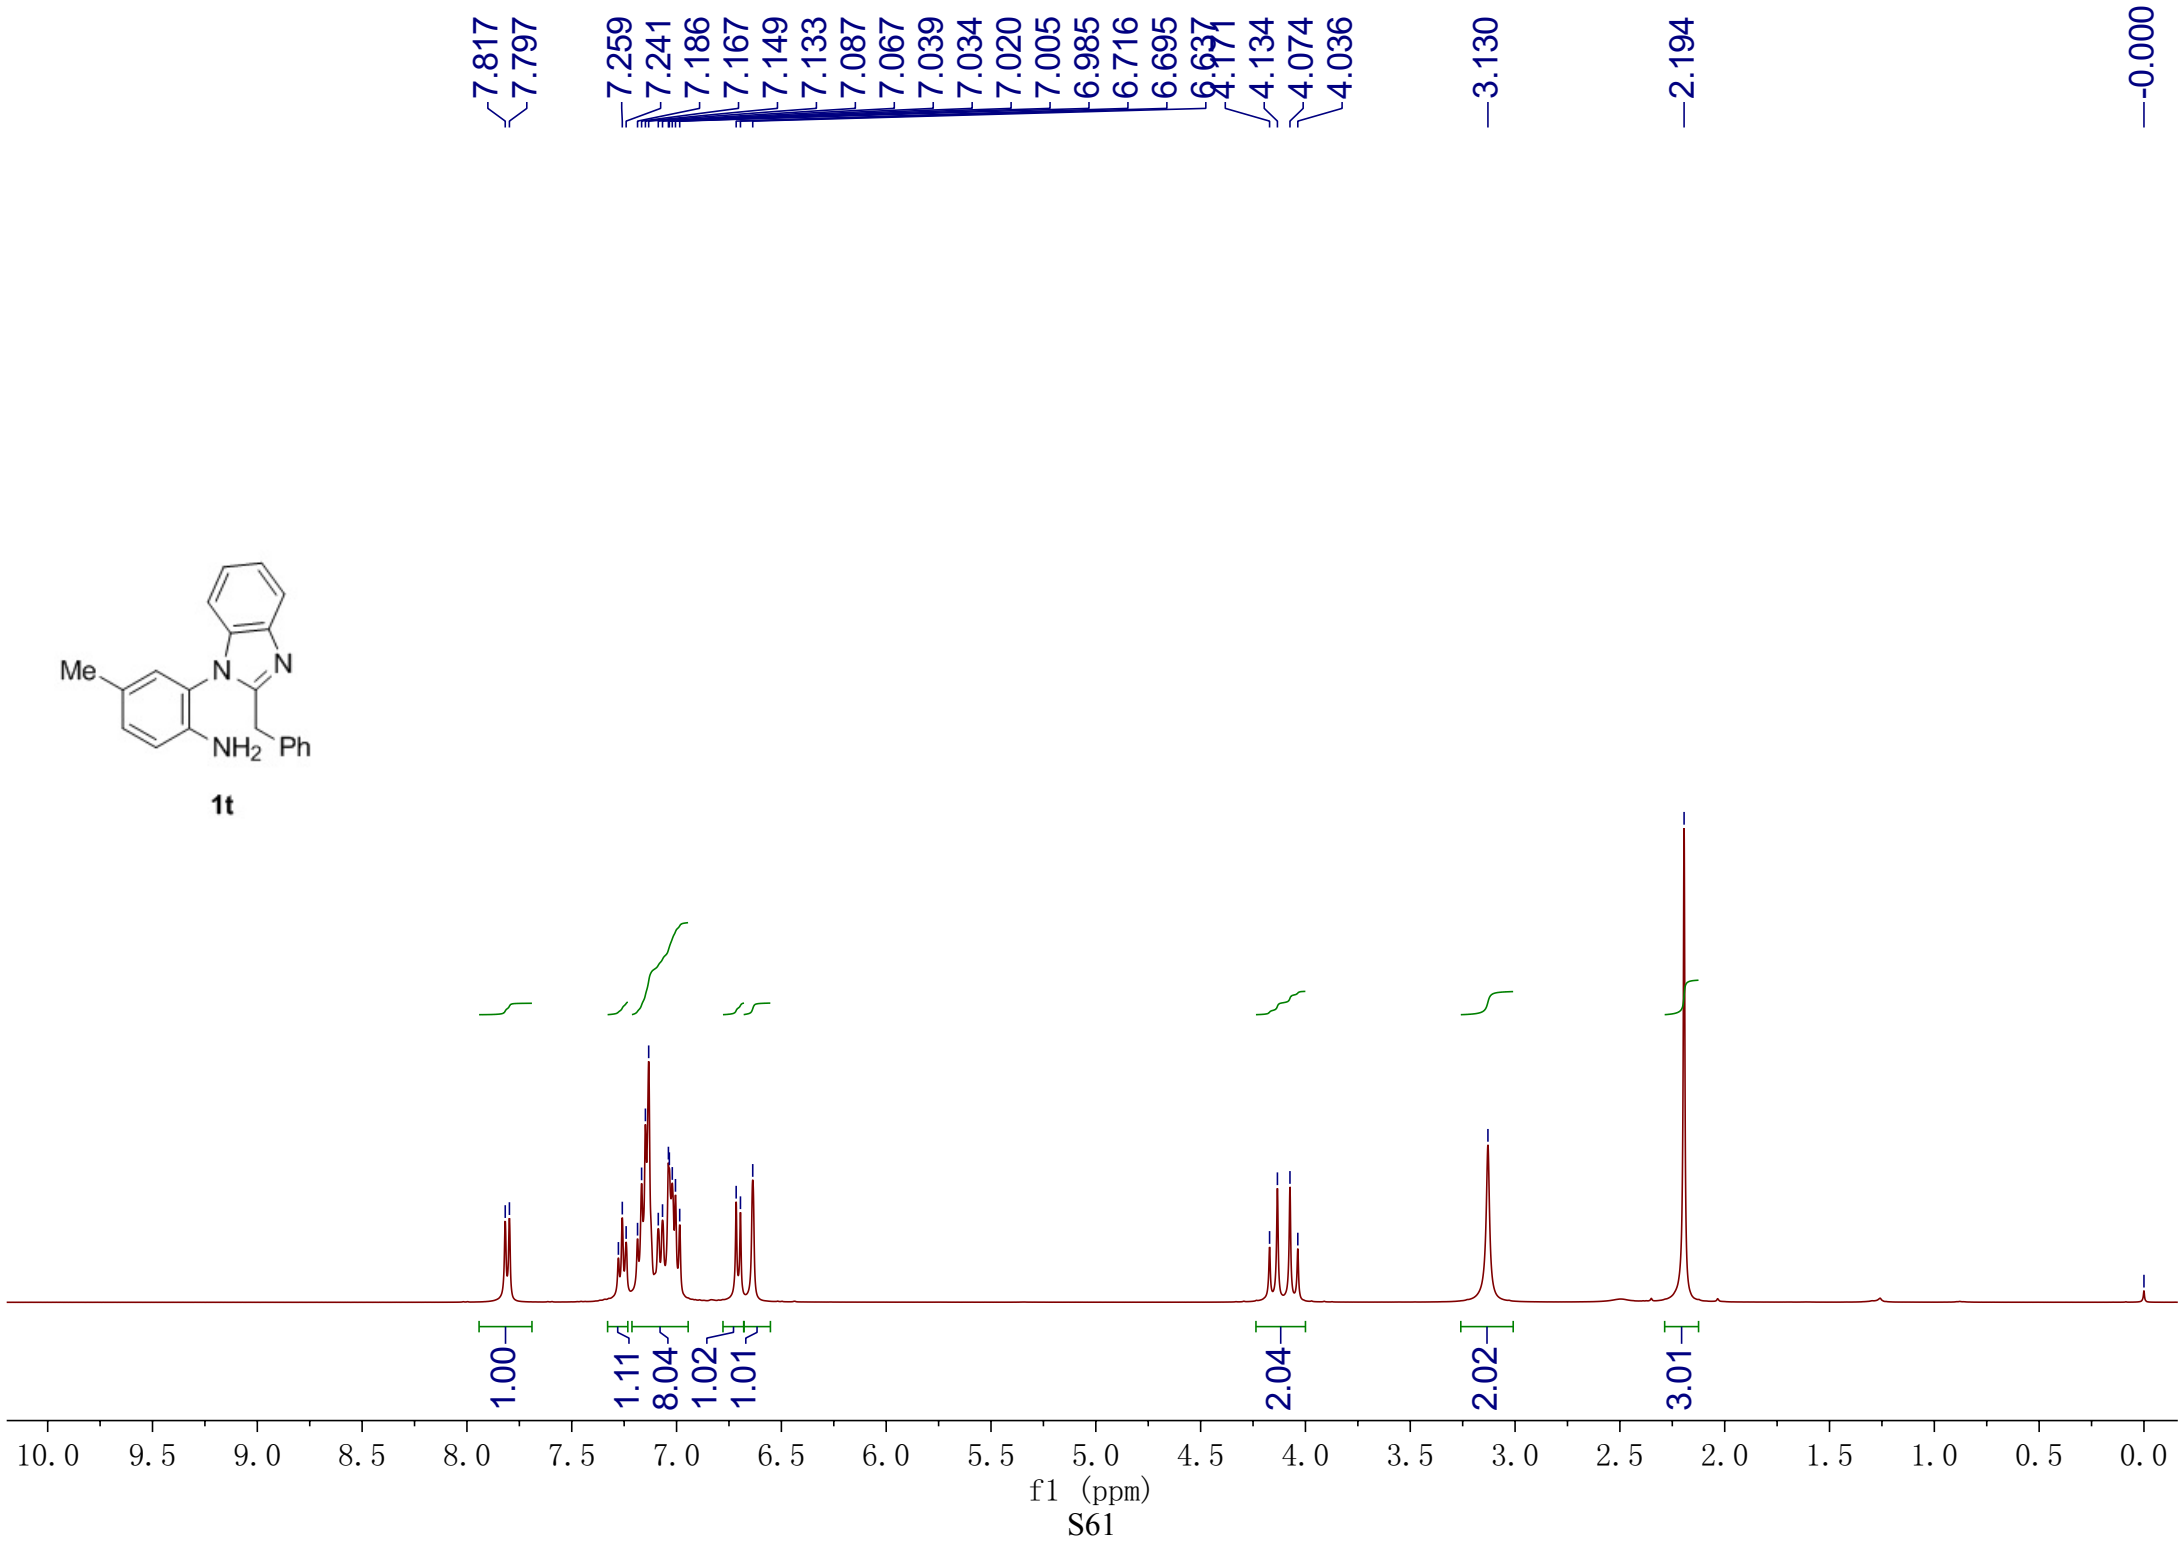

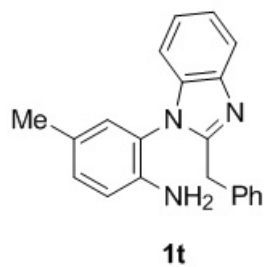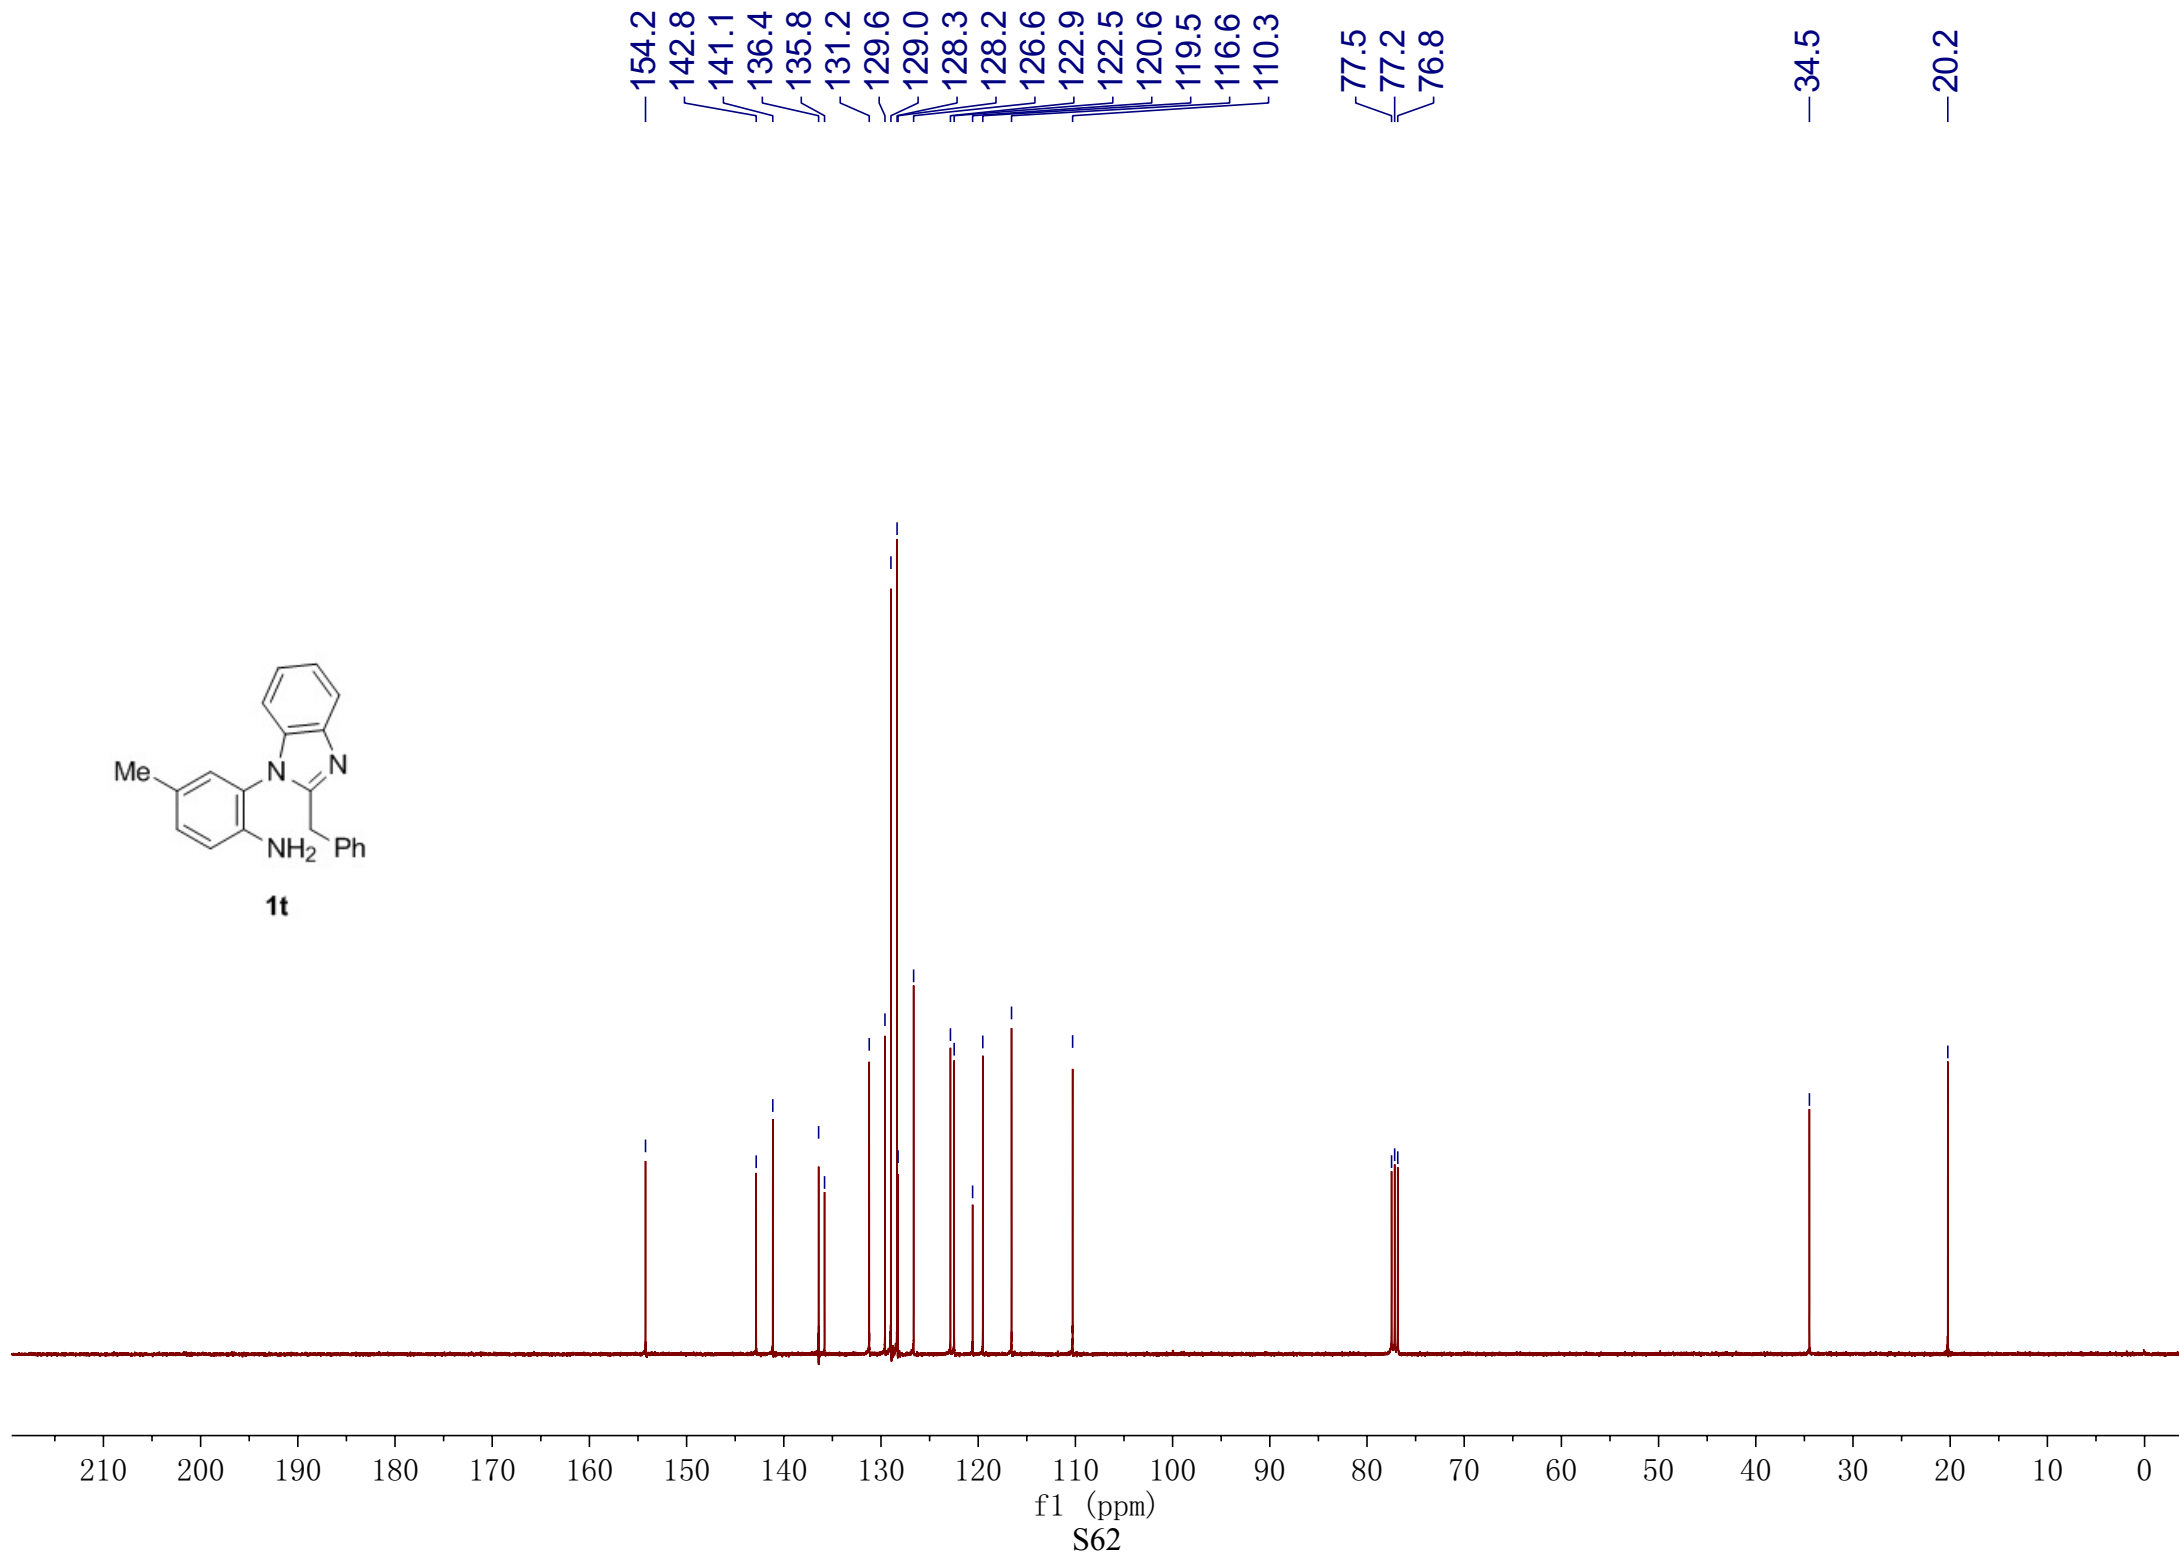

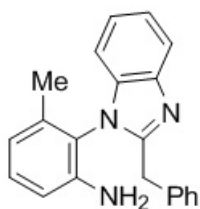

1u

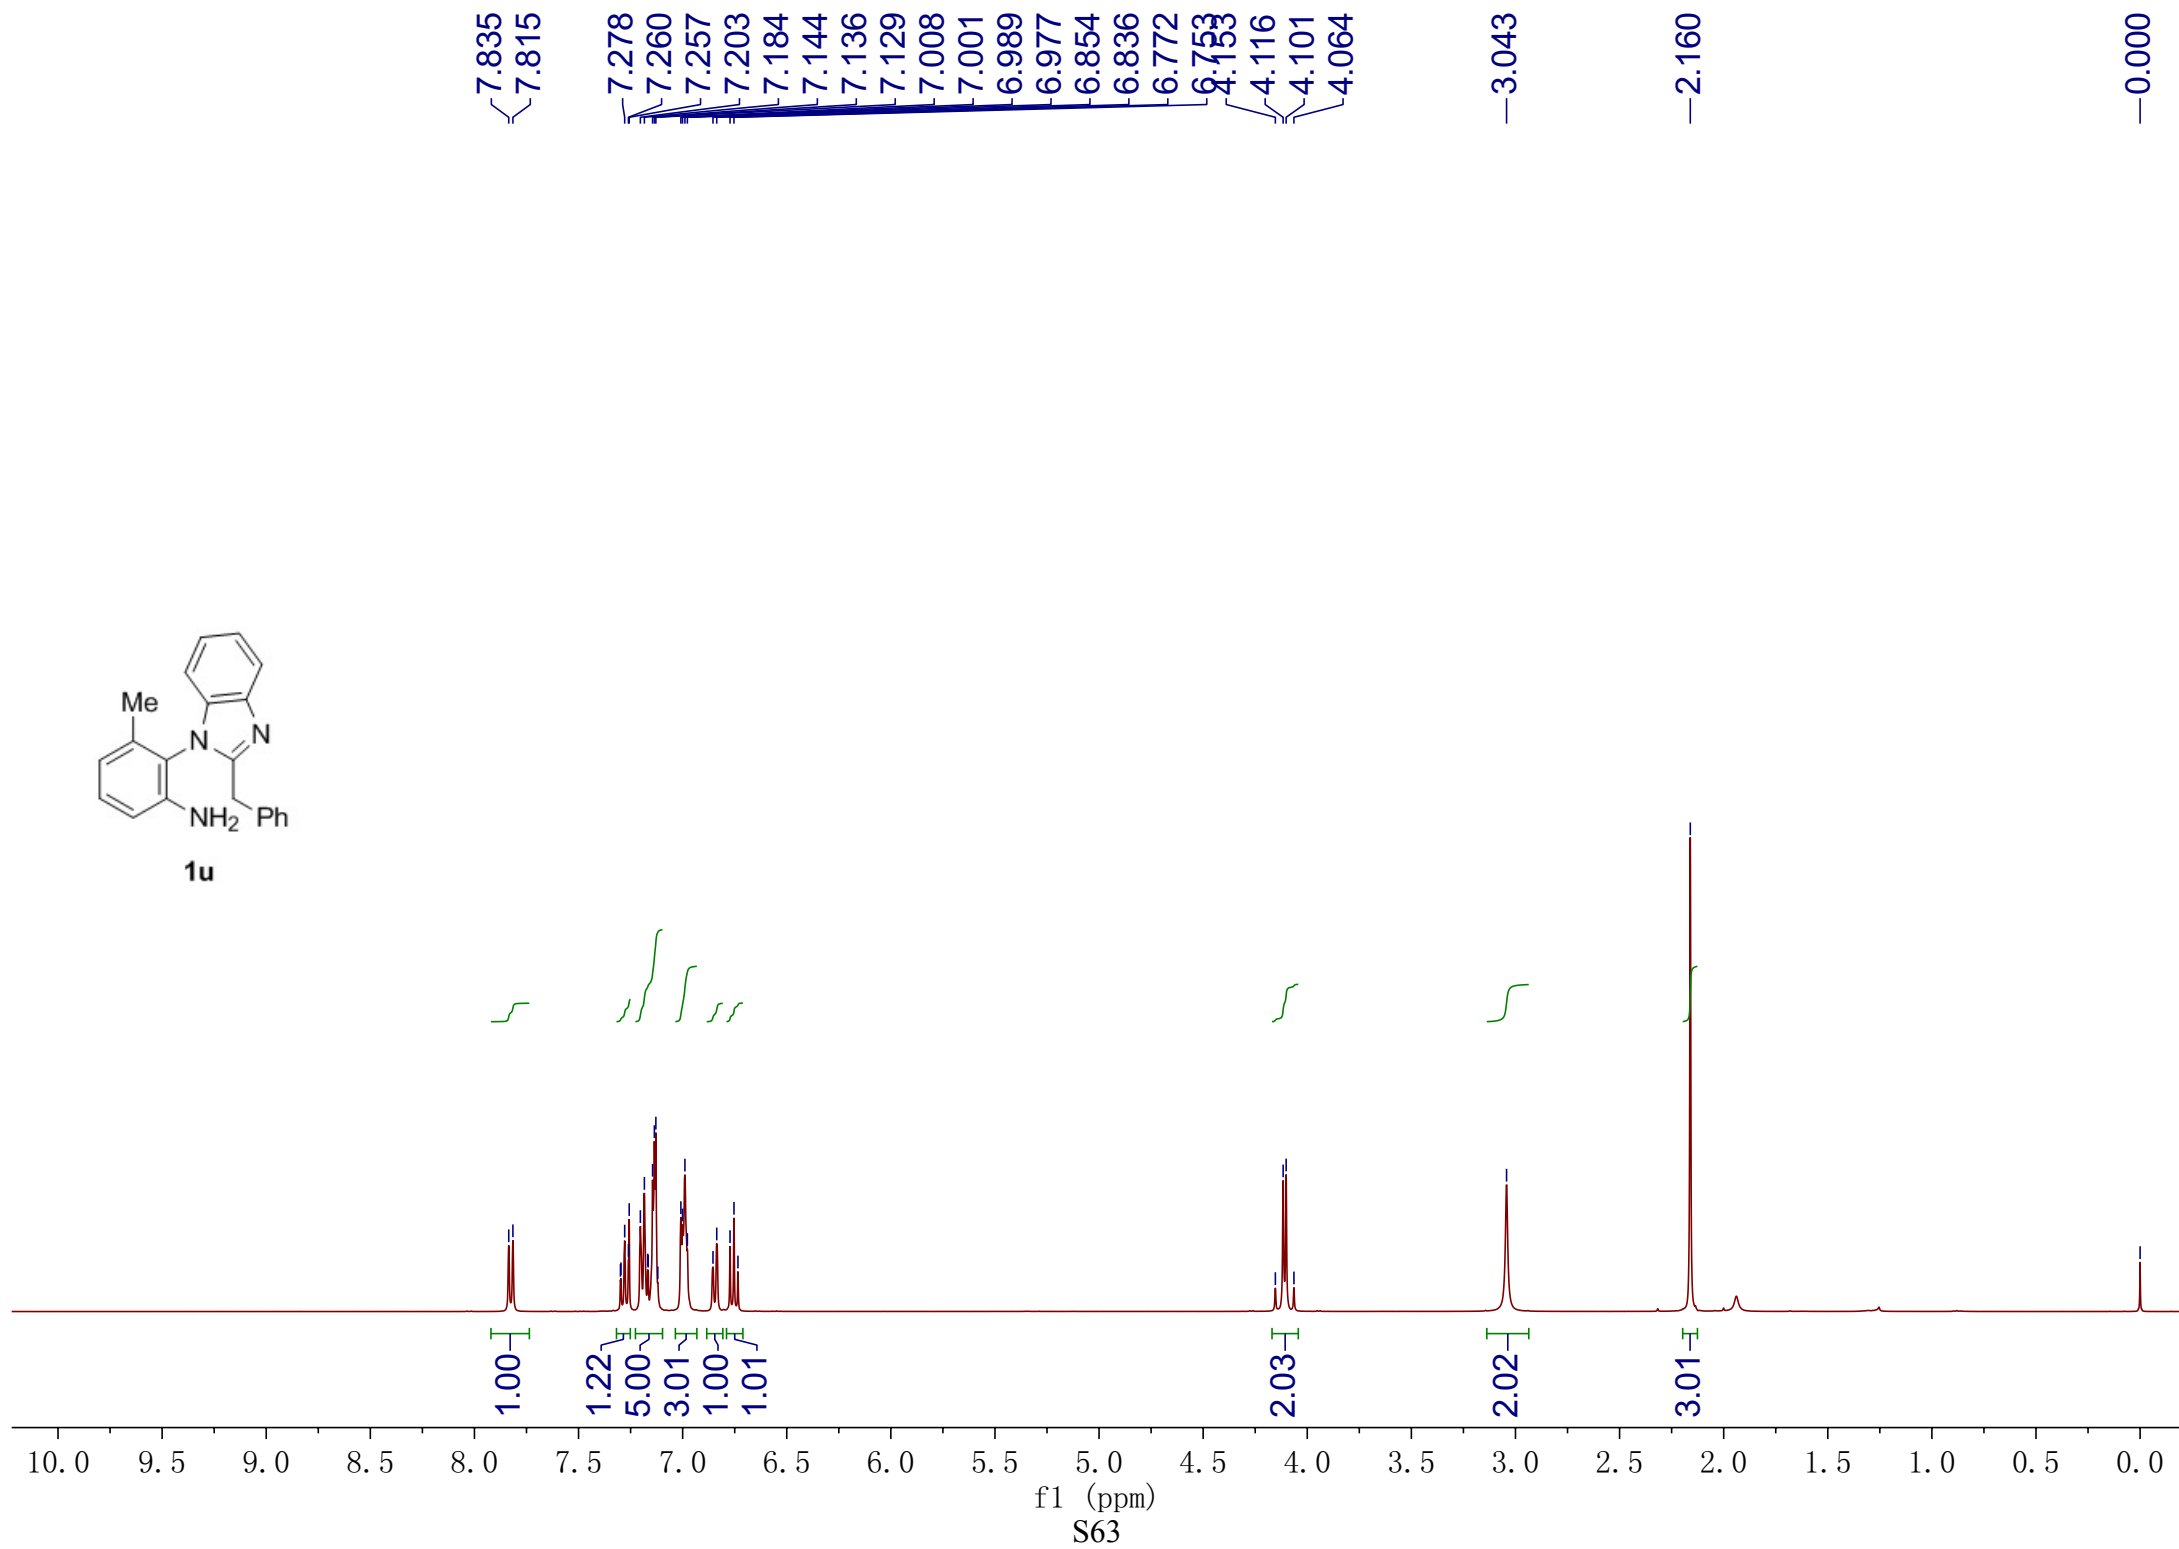

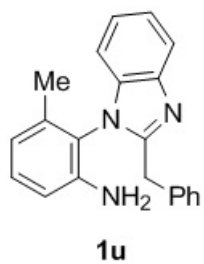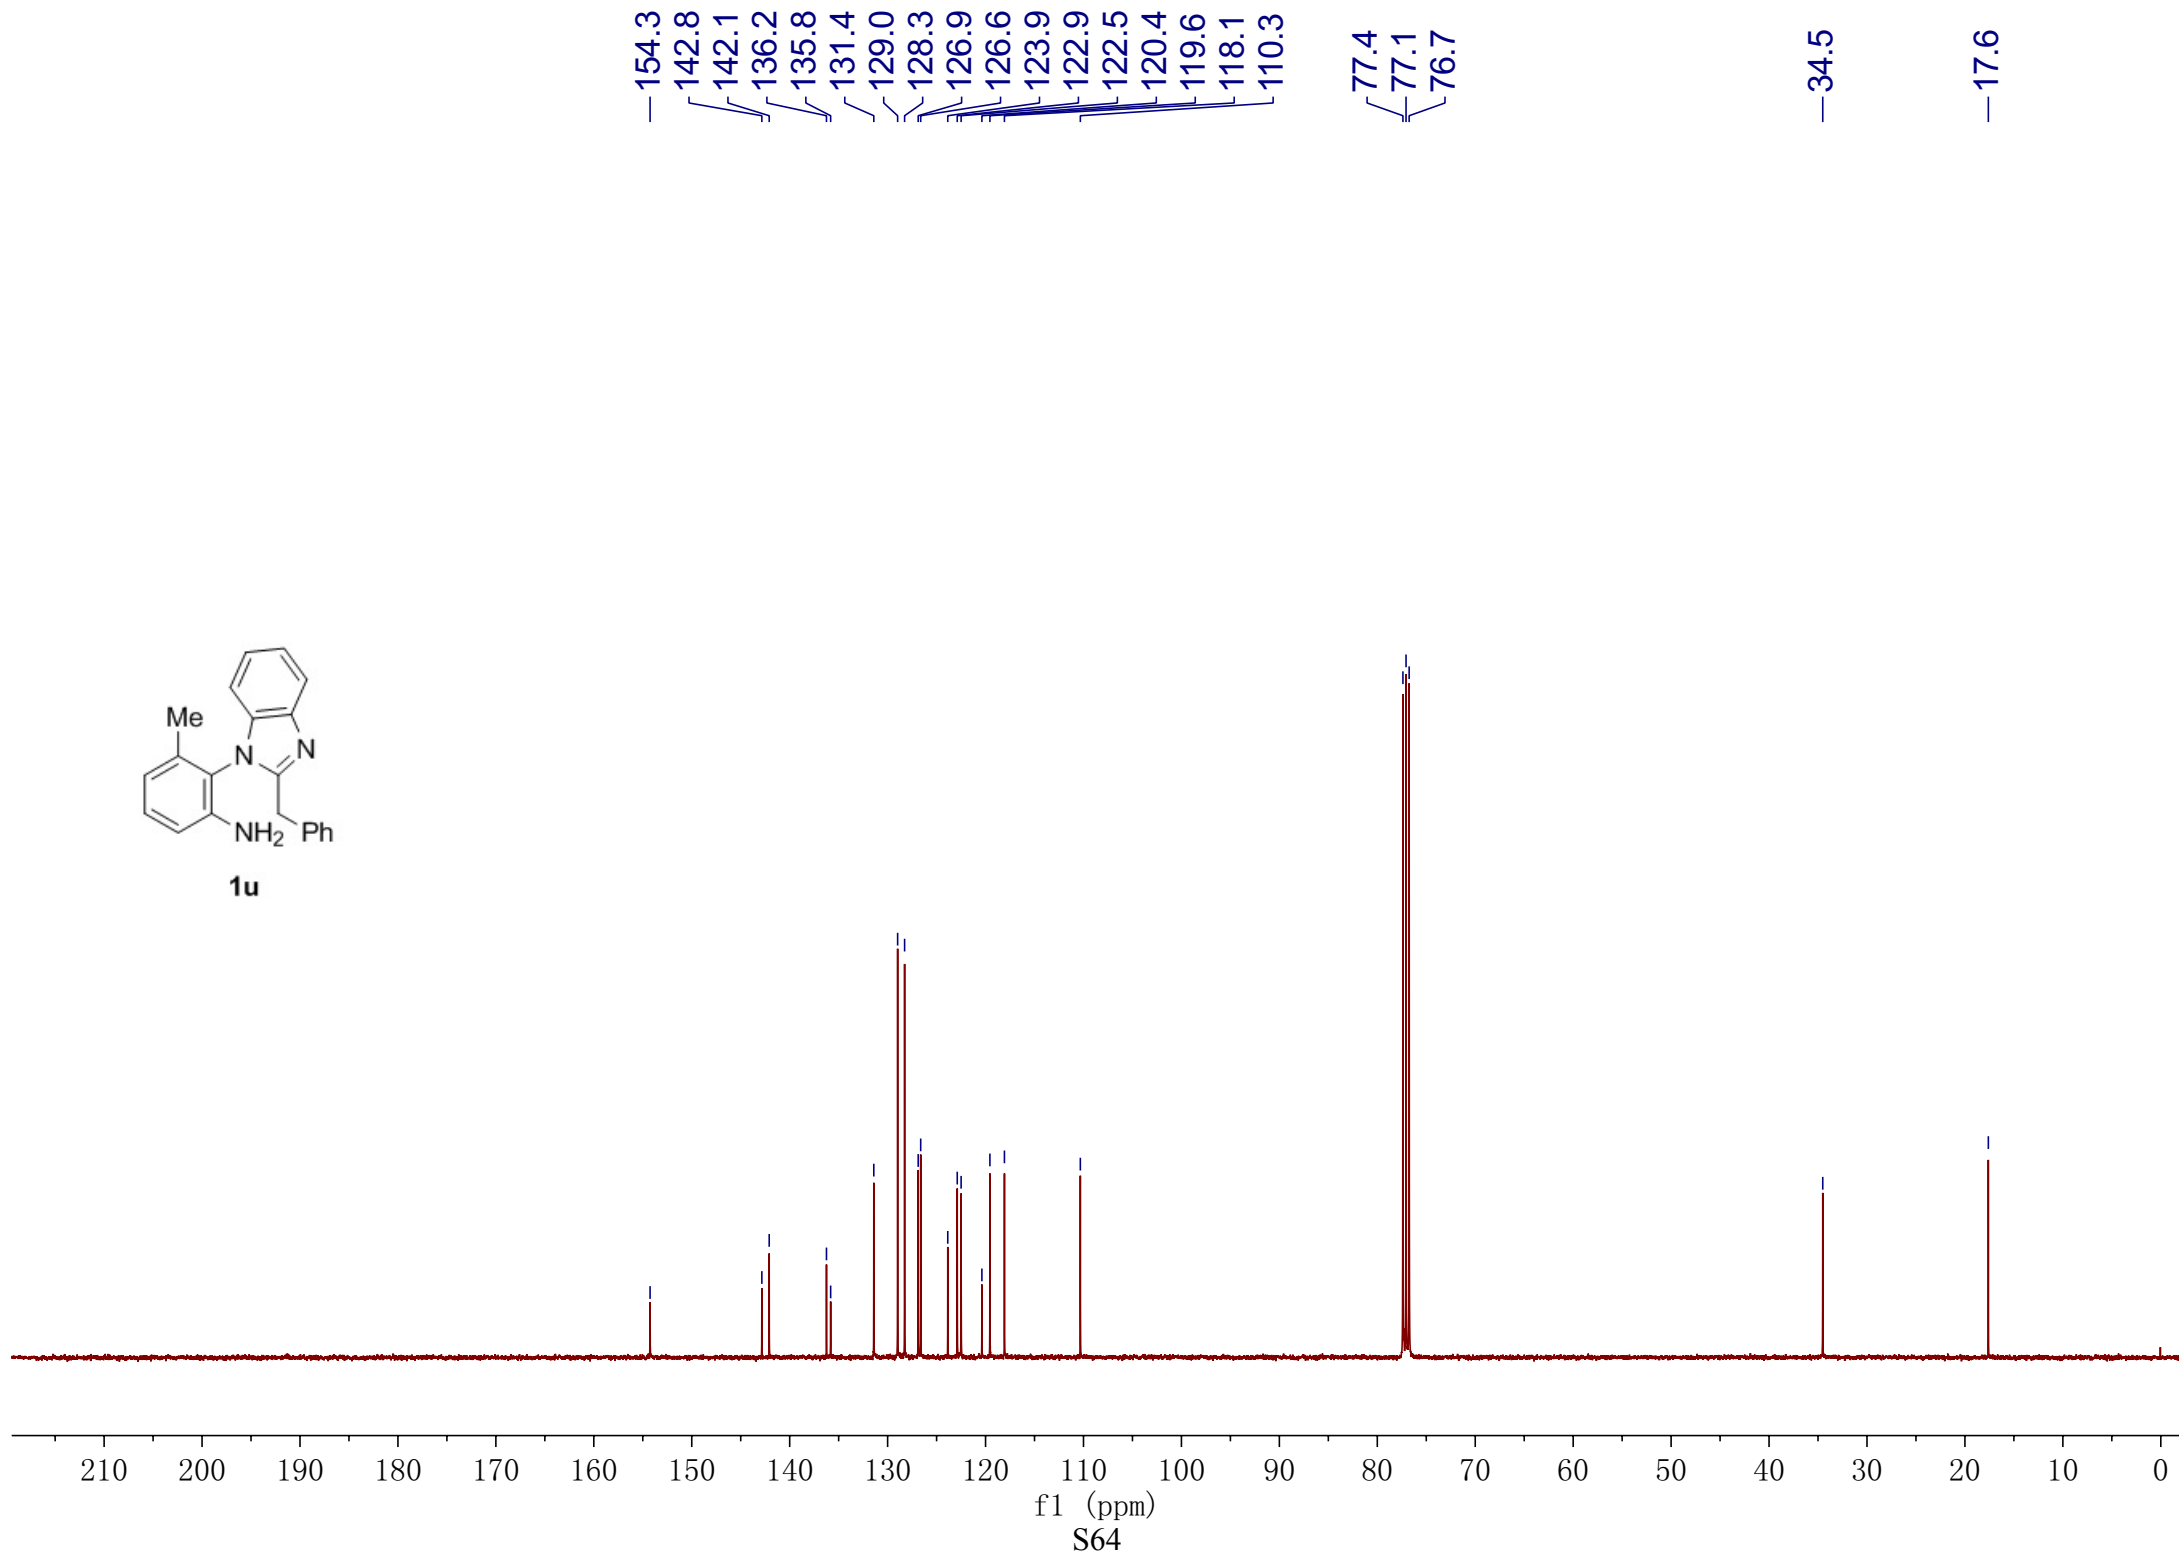

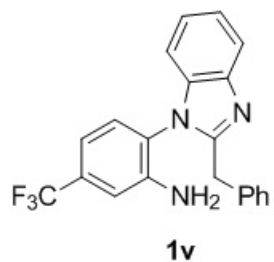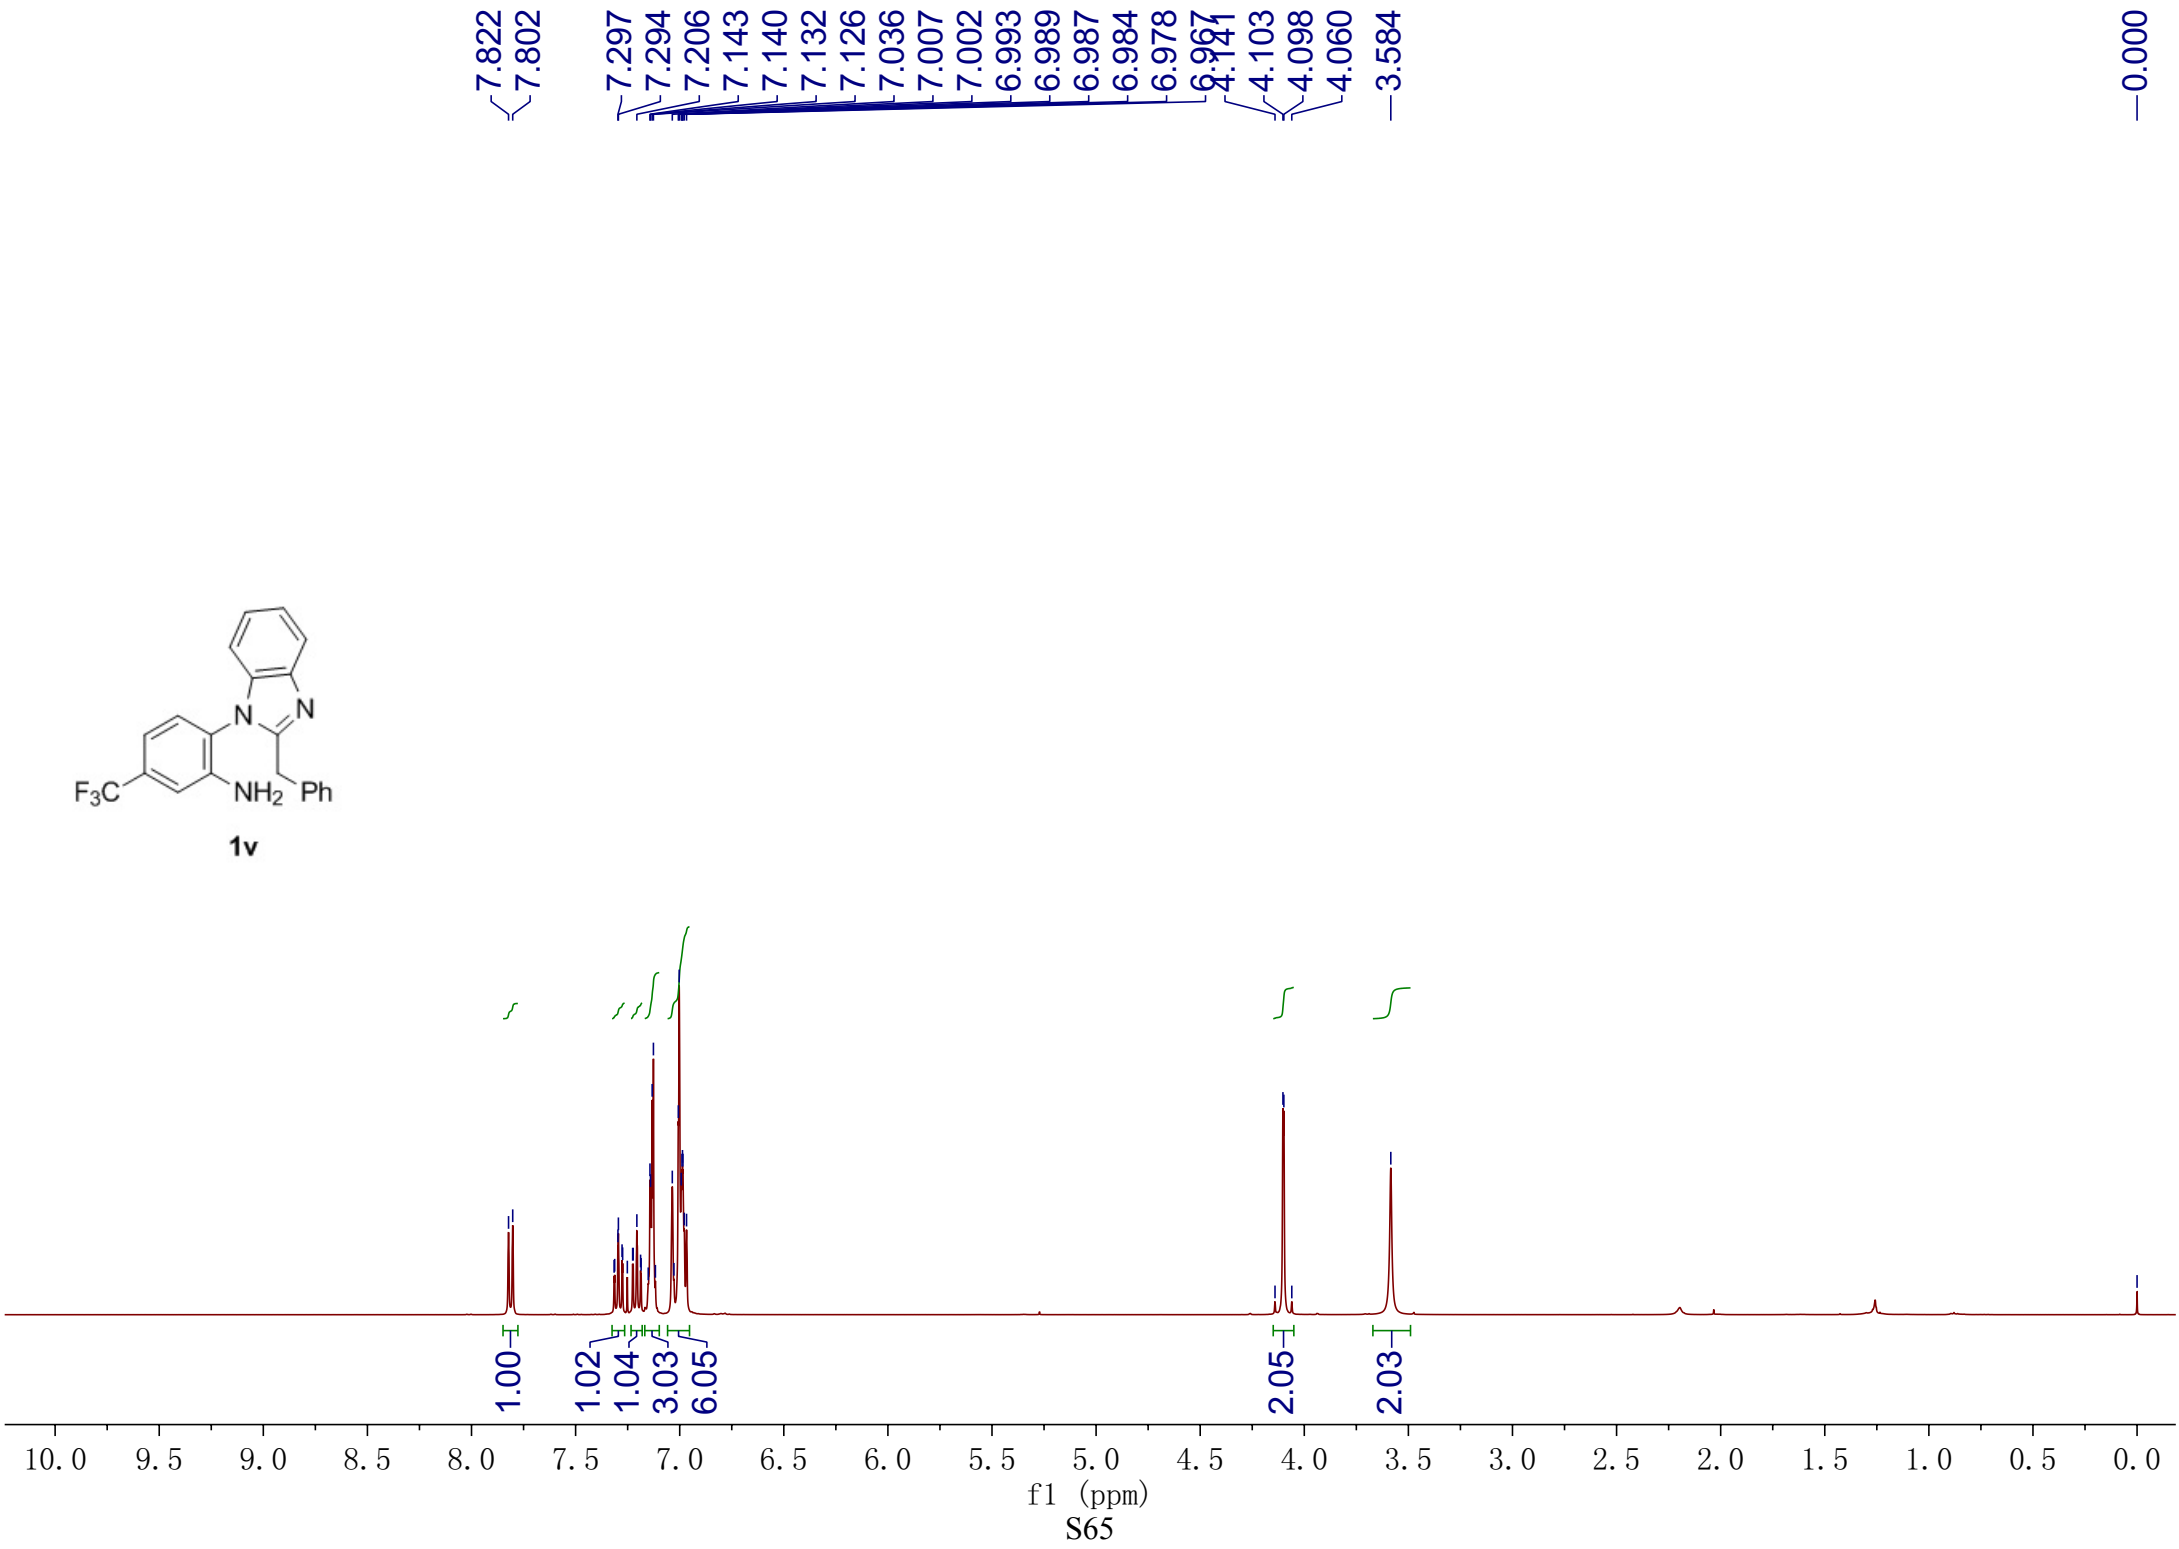

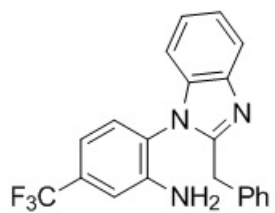

1v

— 153.7  
 / 144.1  
 — 142.8  
 / 135.9  
 / 135.3  
 / 130.0  
 / 128.8  
 / 128.5  
 / 126.9  
 / 123.3  
 / 123.2  
 / 122.9  
 / 119.8  
 / 115.0  
 / 115.0  
 / 113.0  
 / 113.0  
 / 110.0  
 / 77.4  
 / 77.1  
 / 76.8

— 34.5

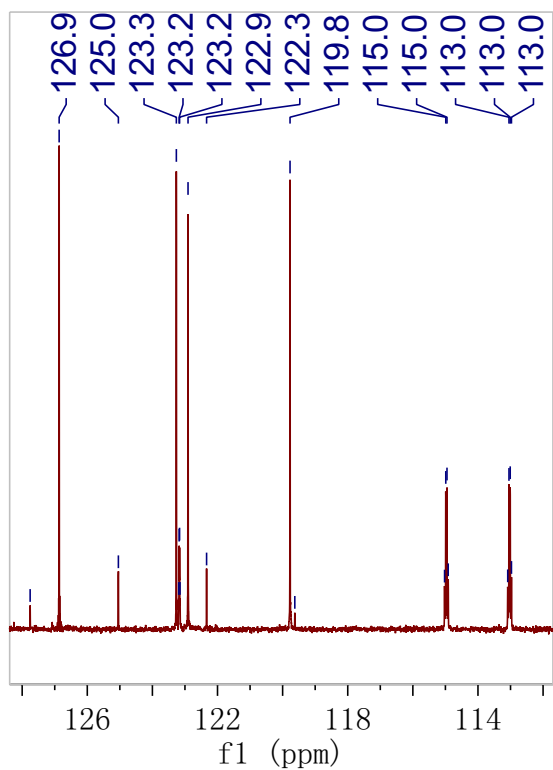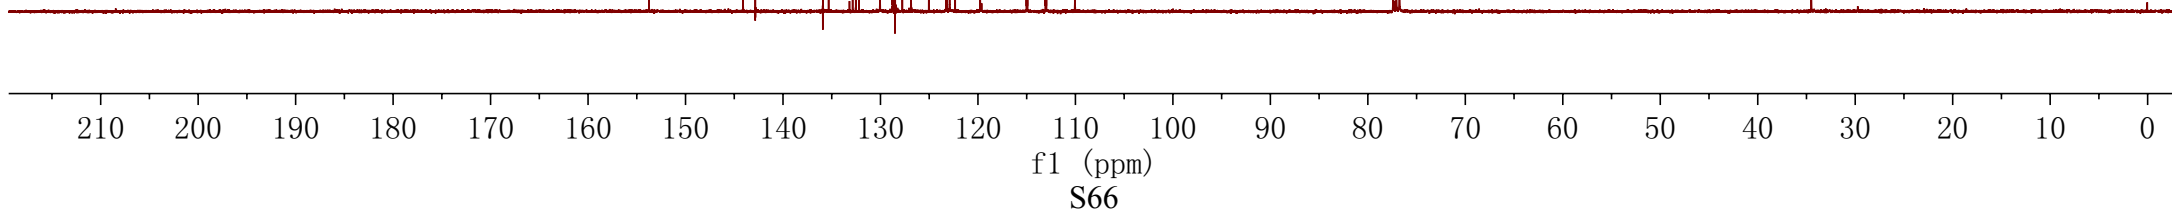

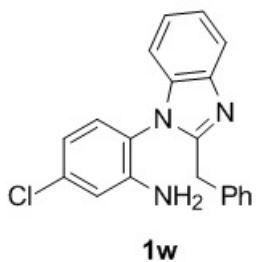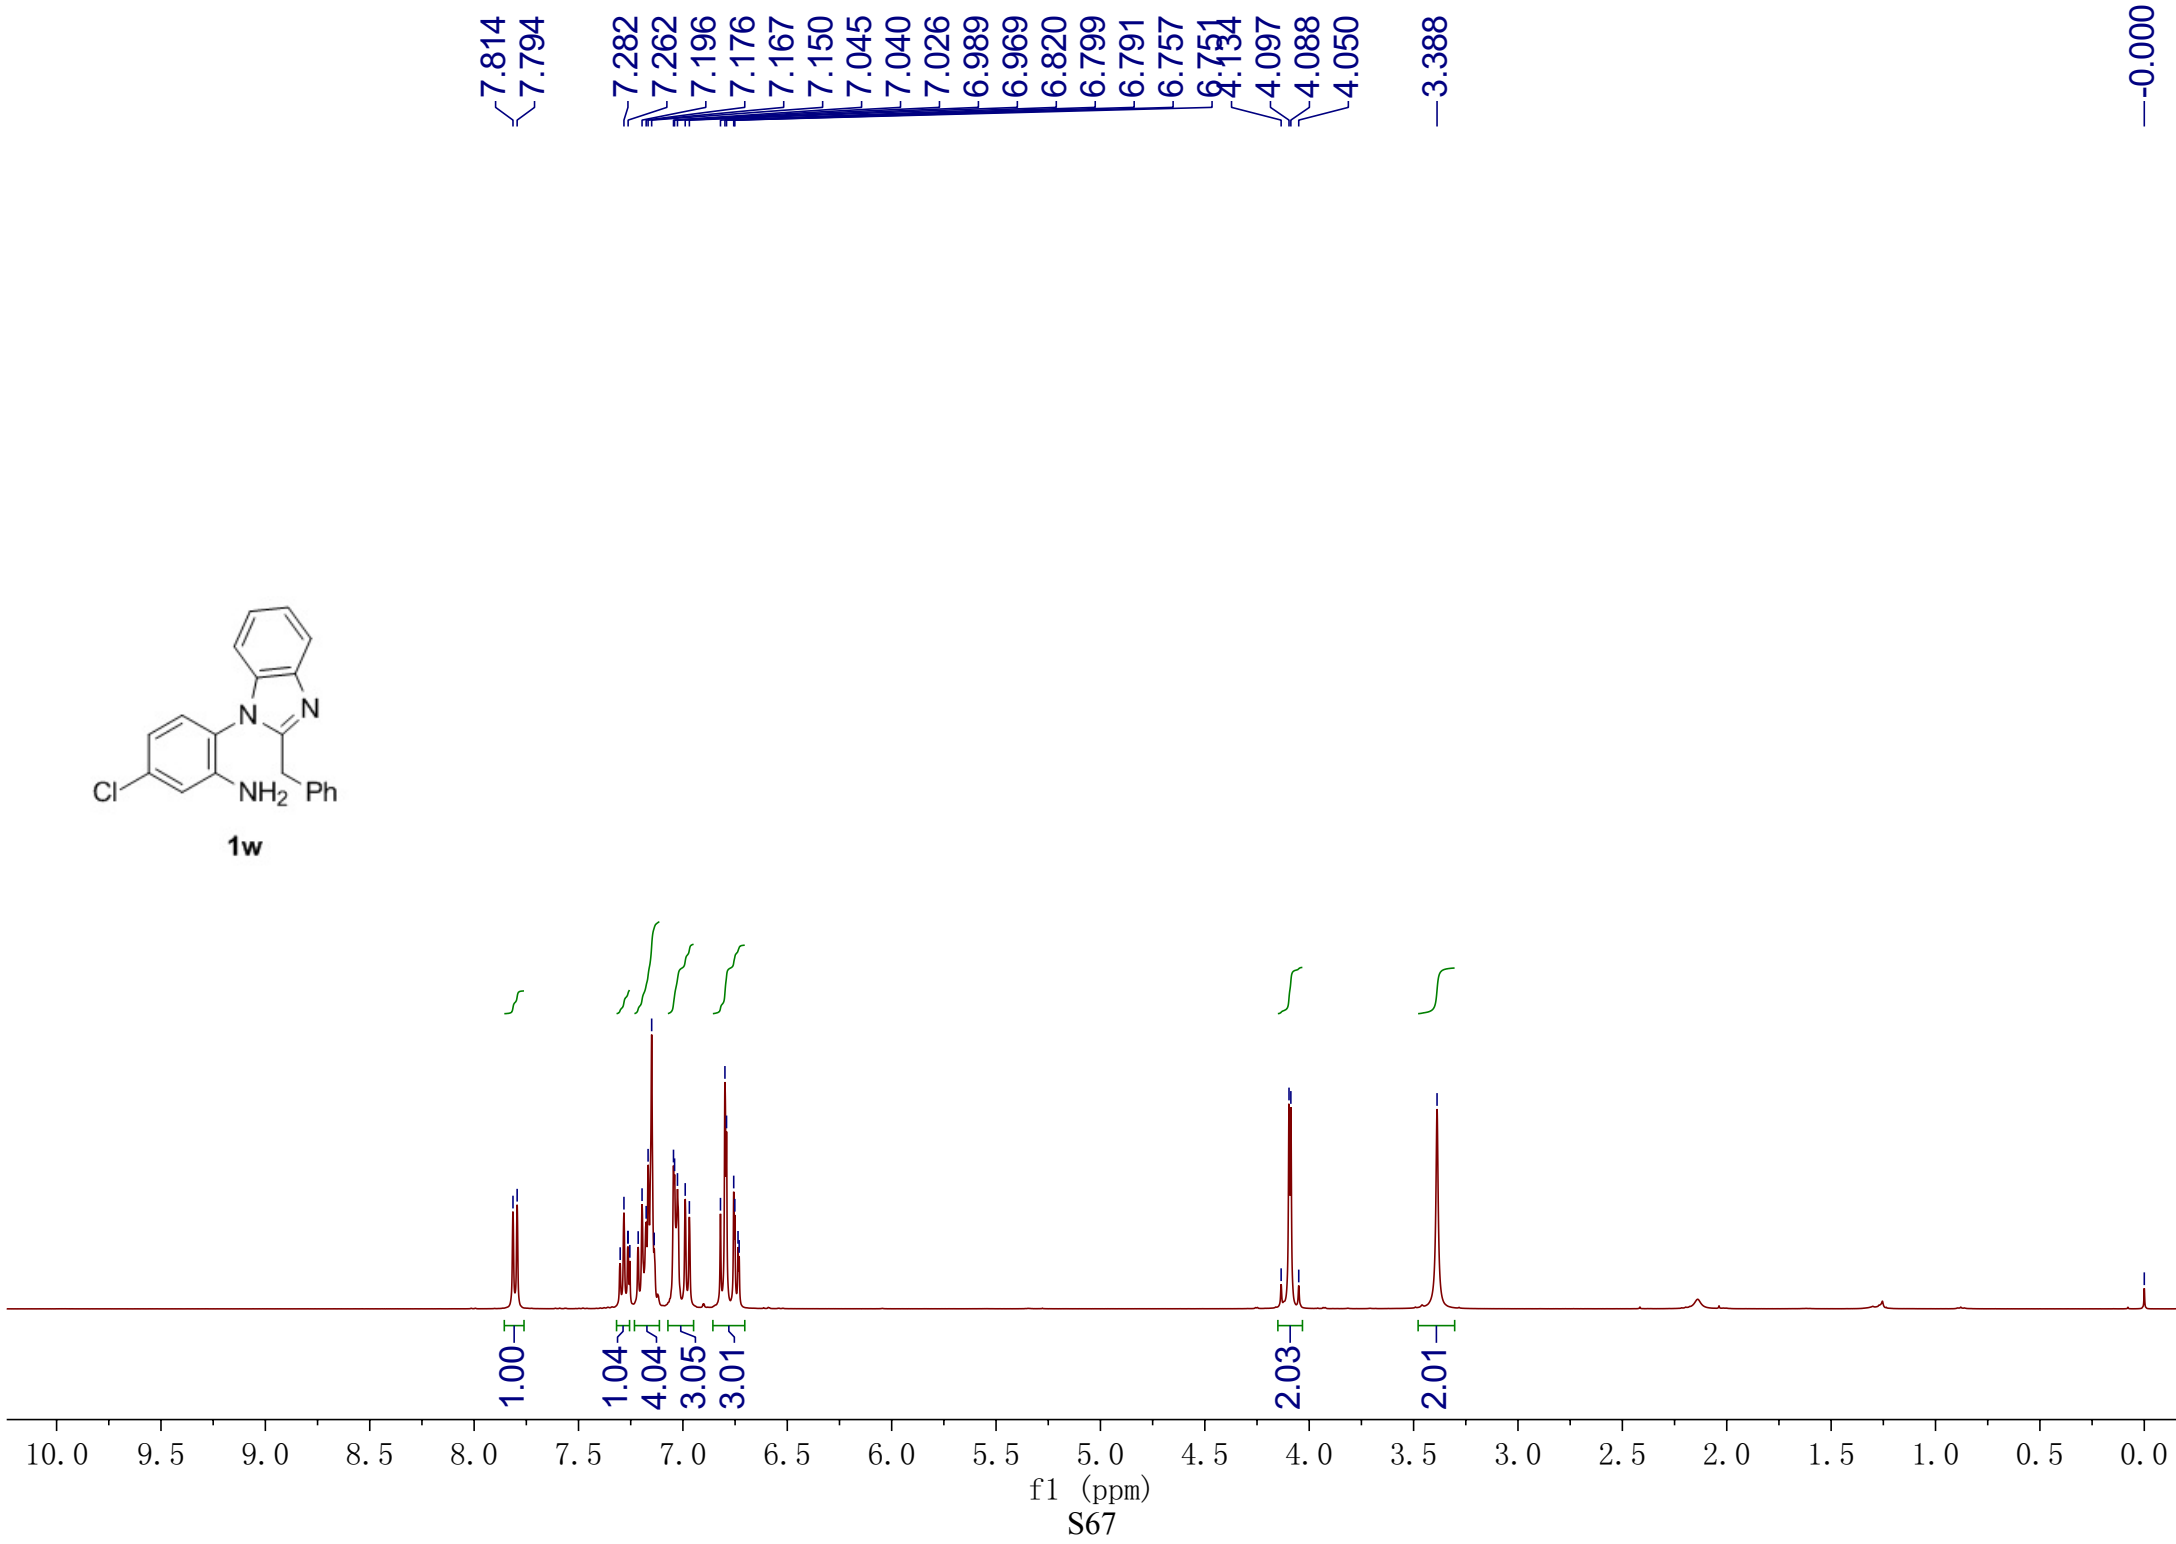

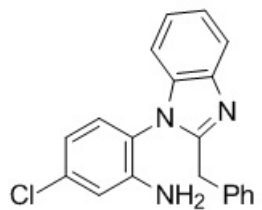

1w

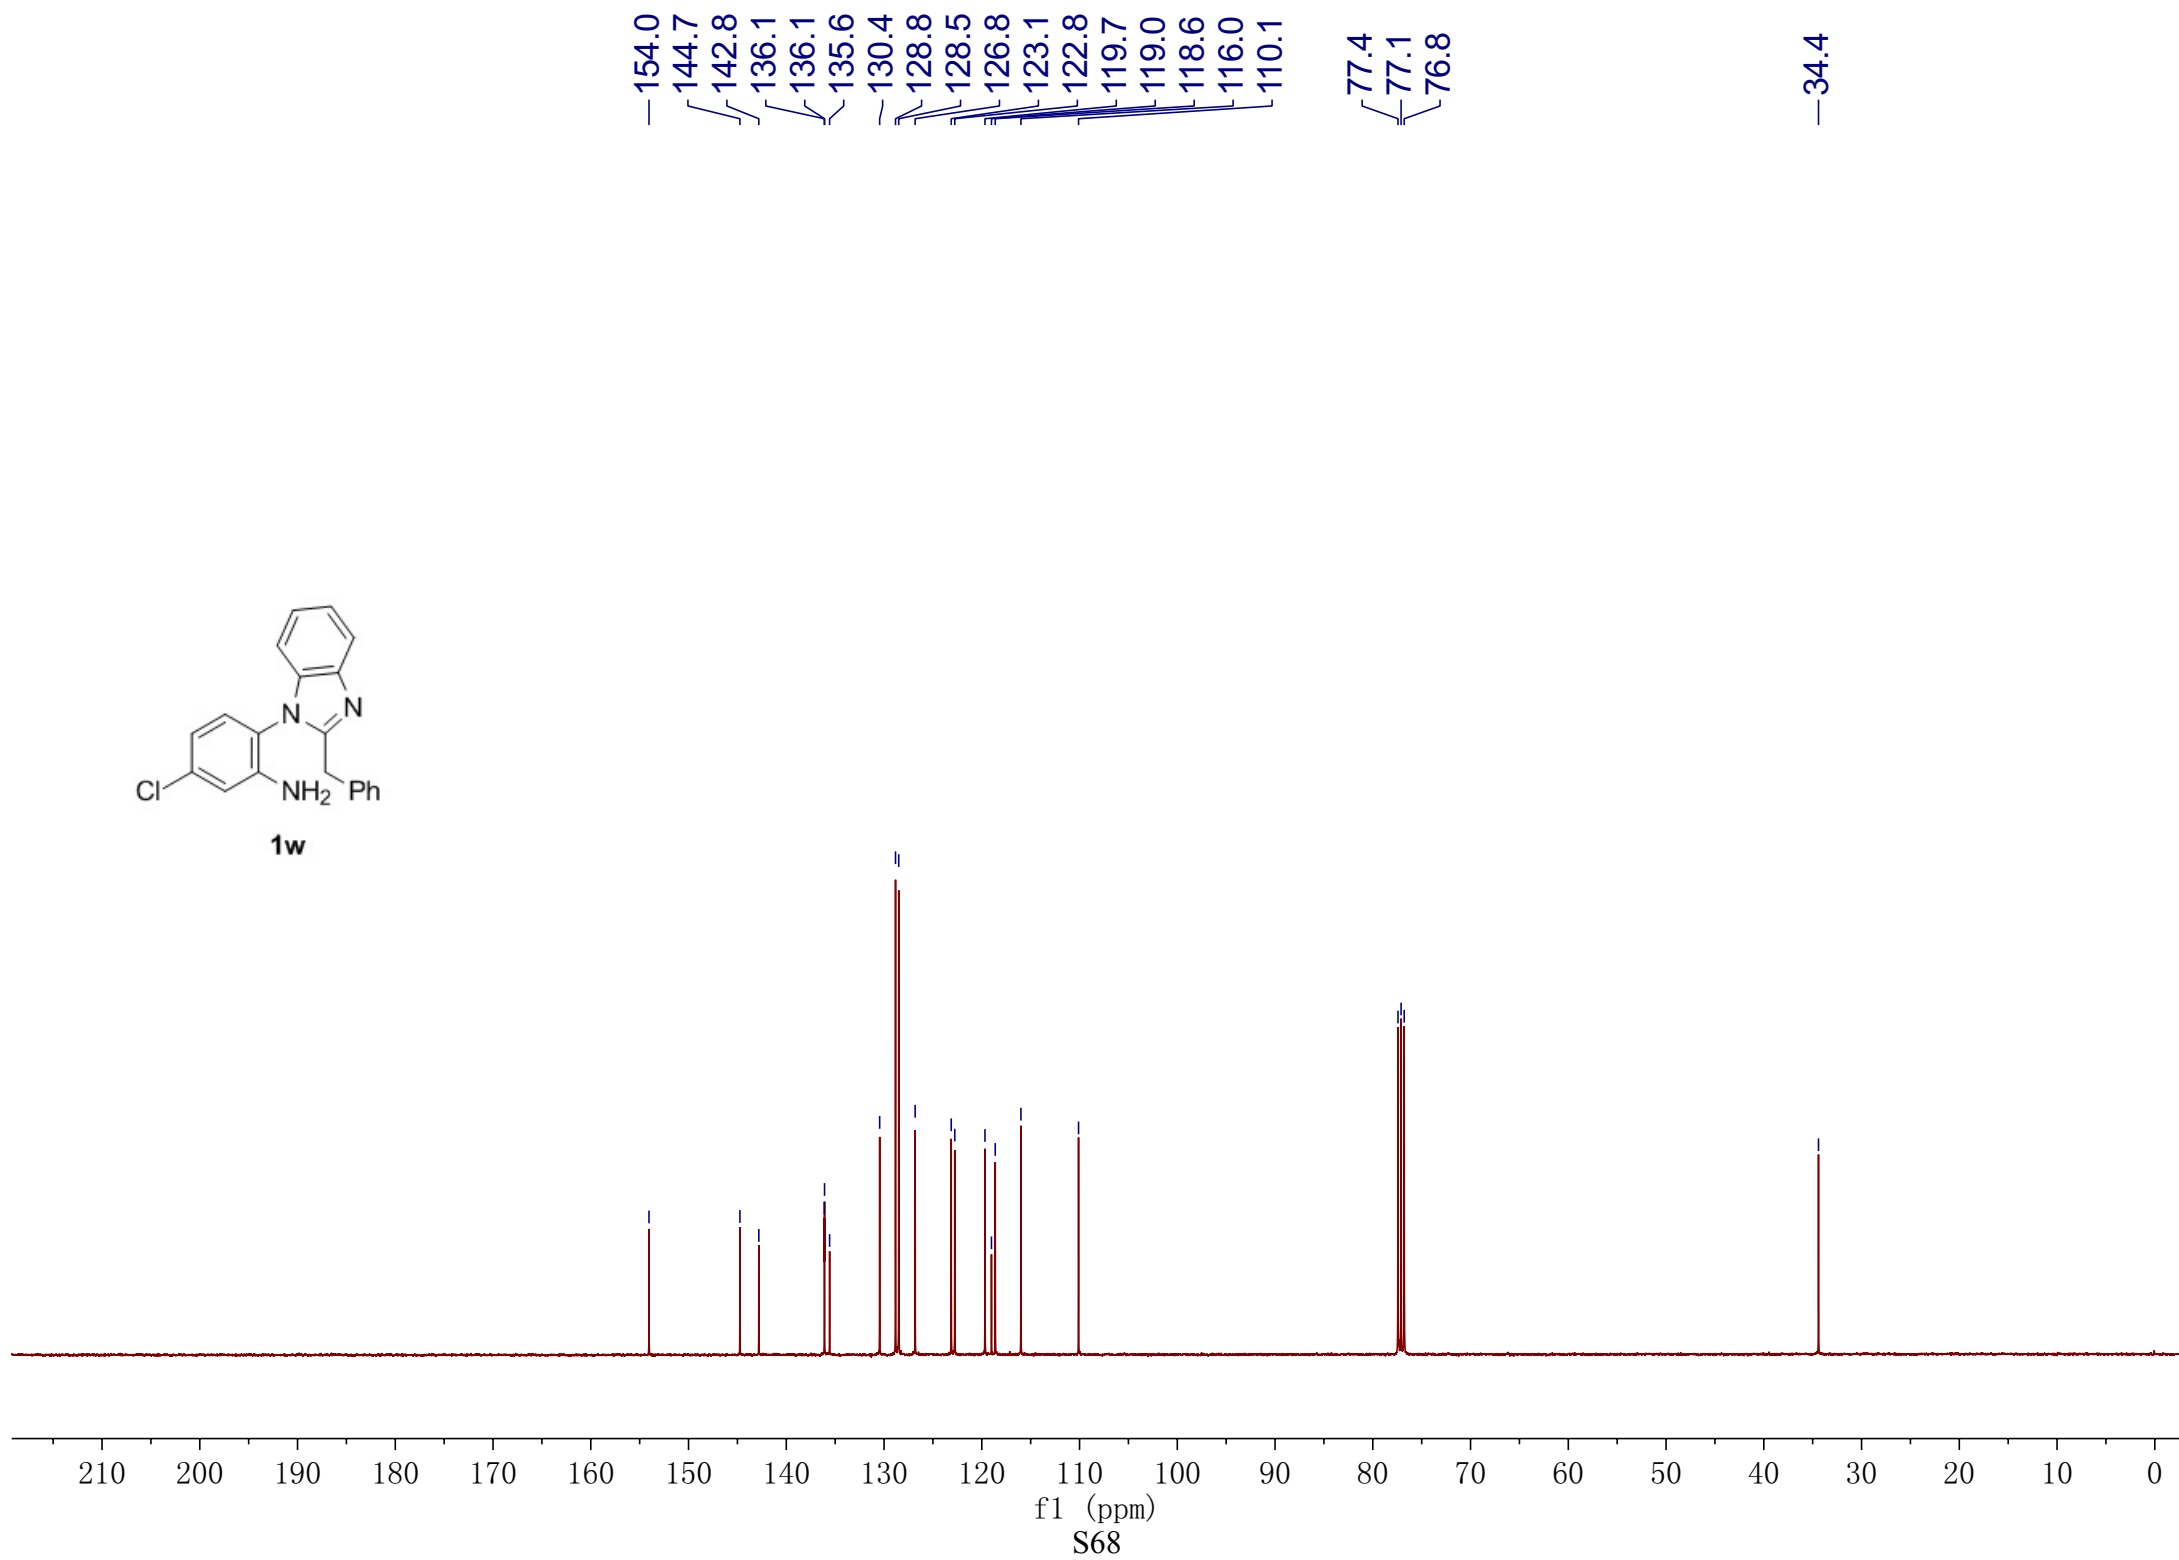



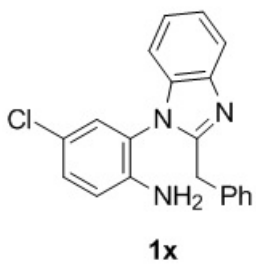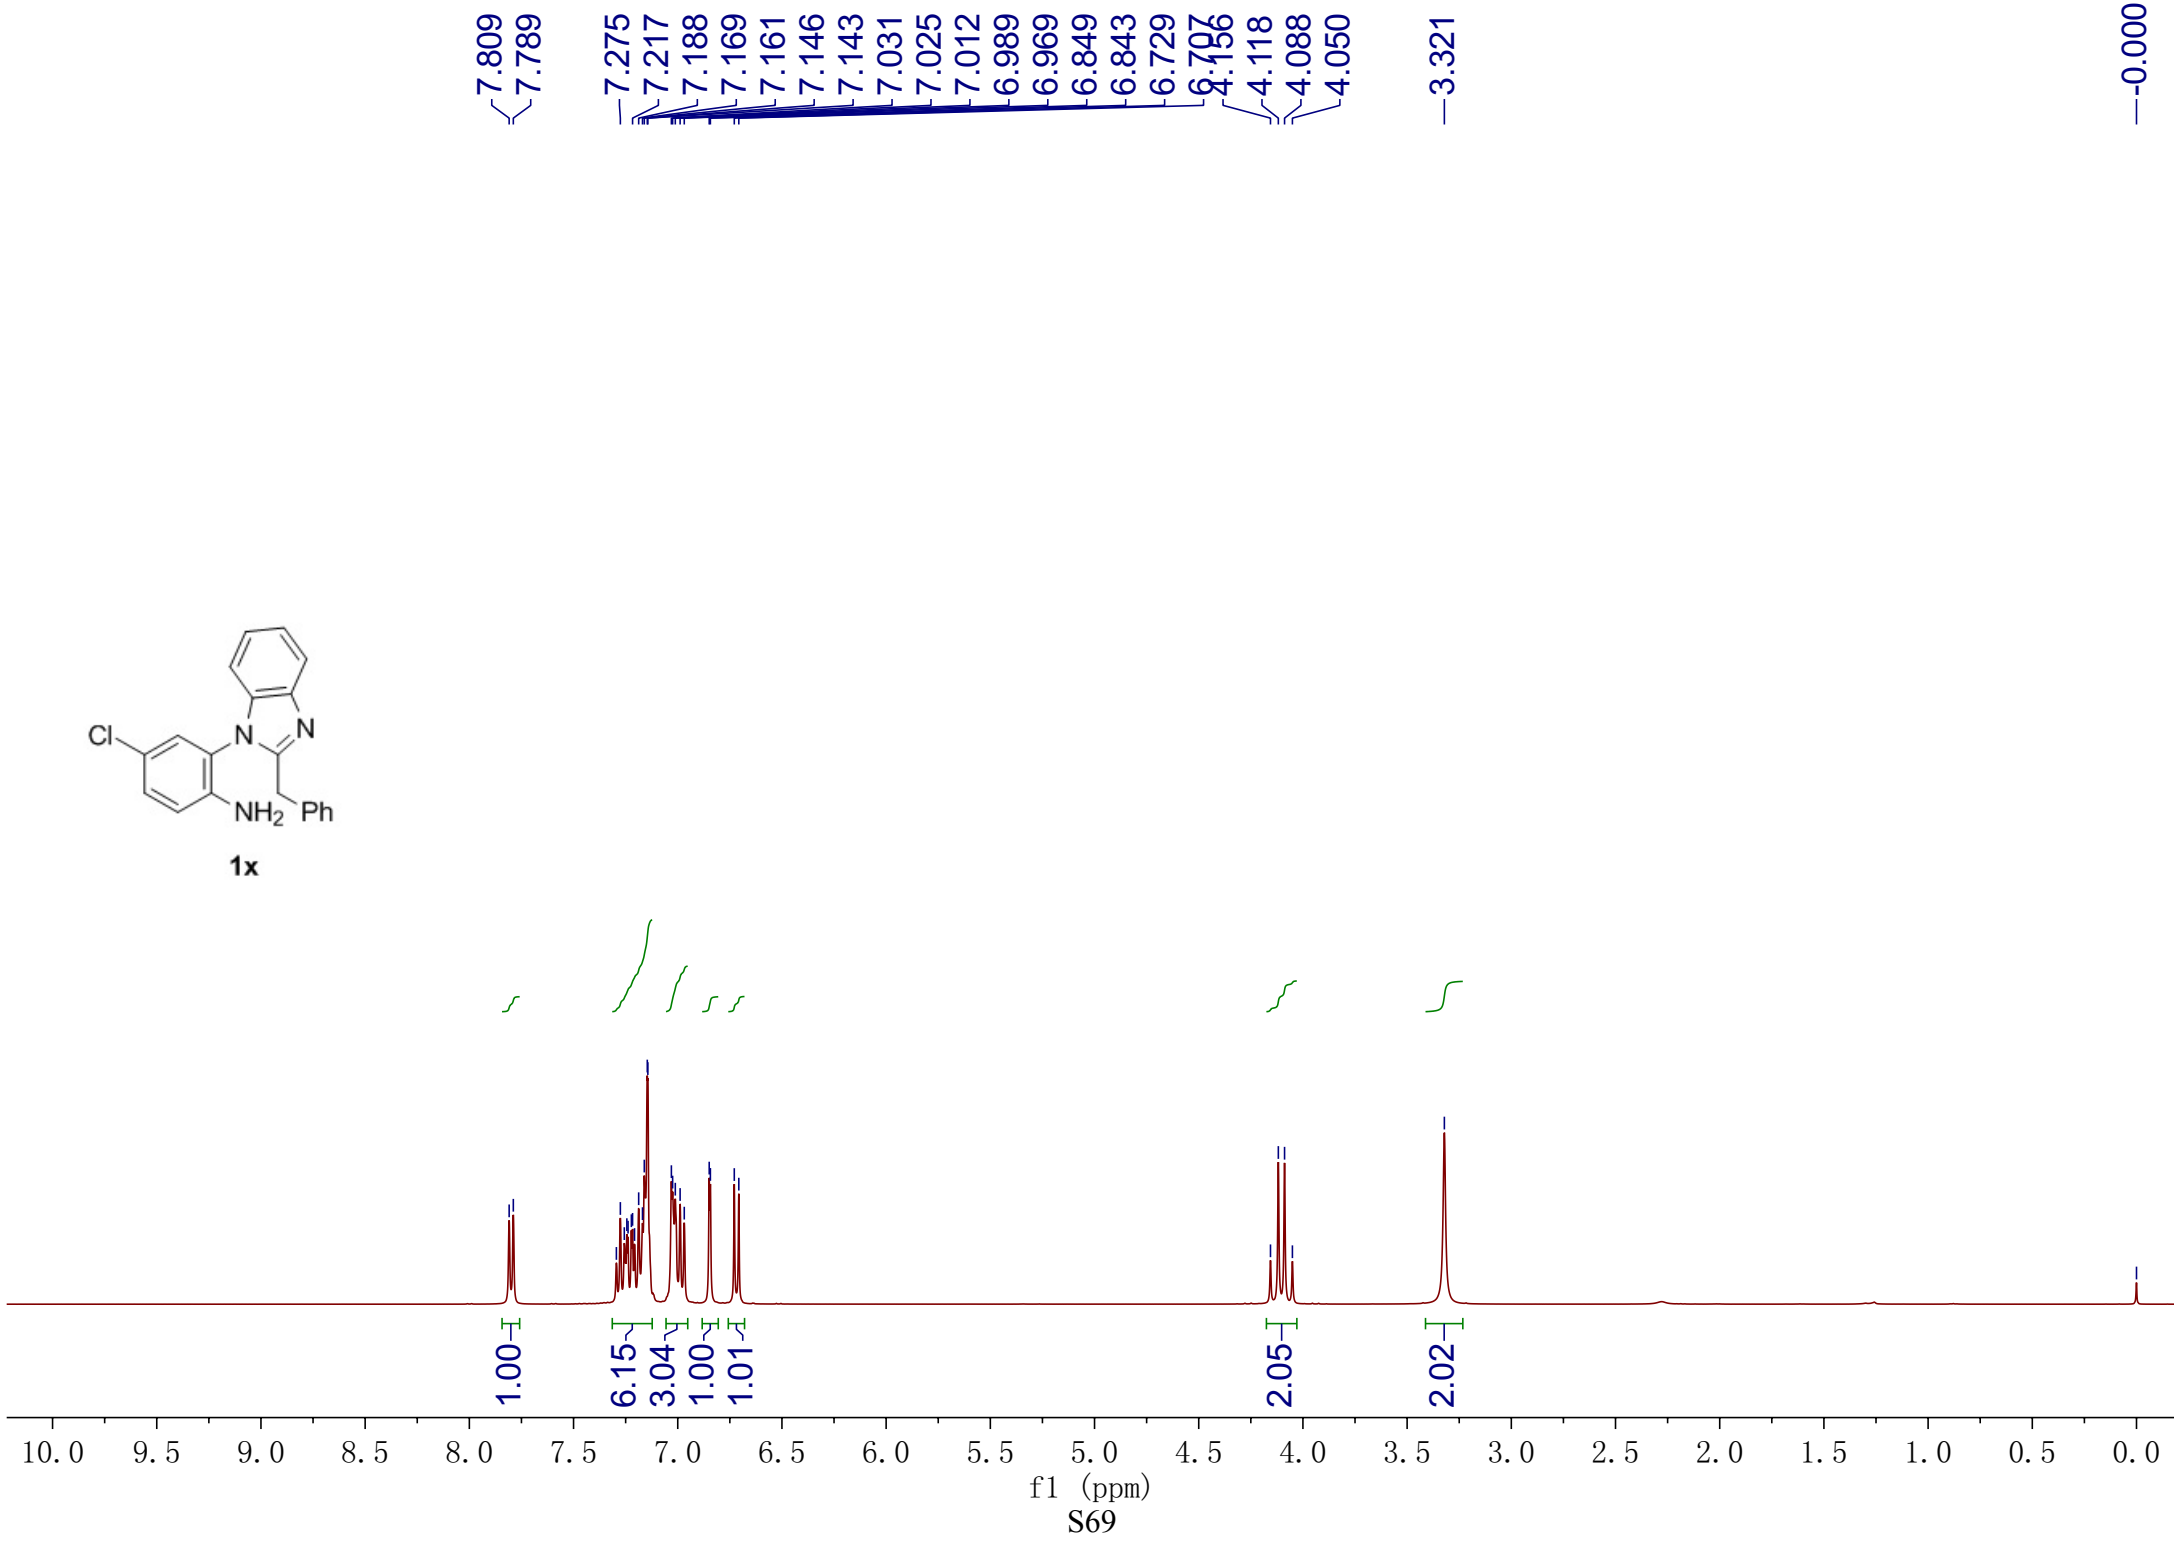

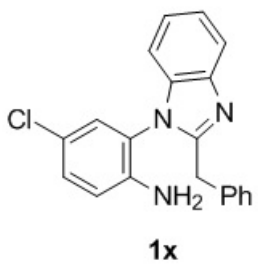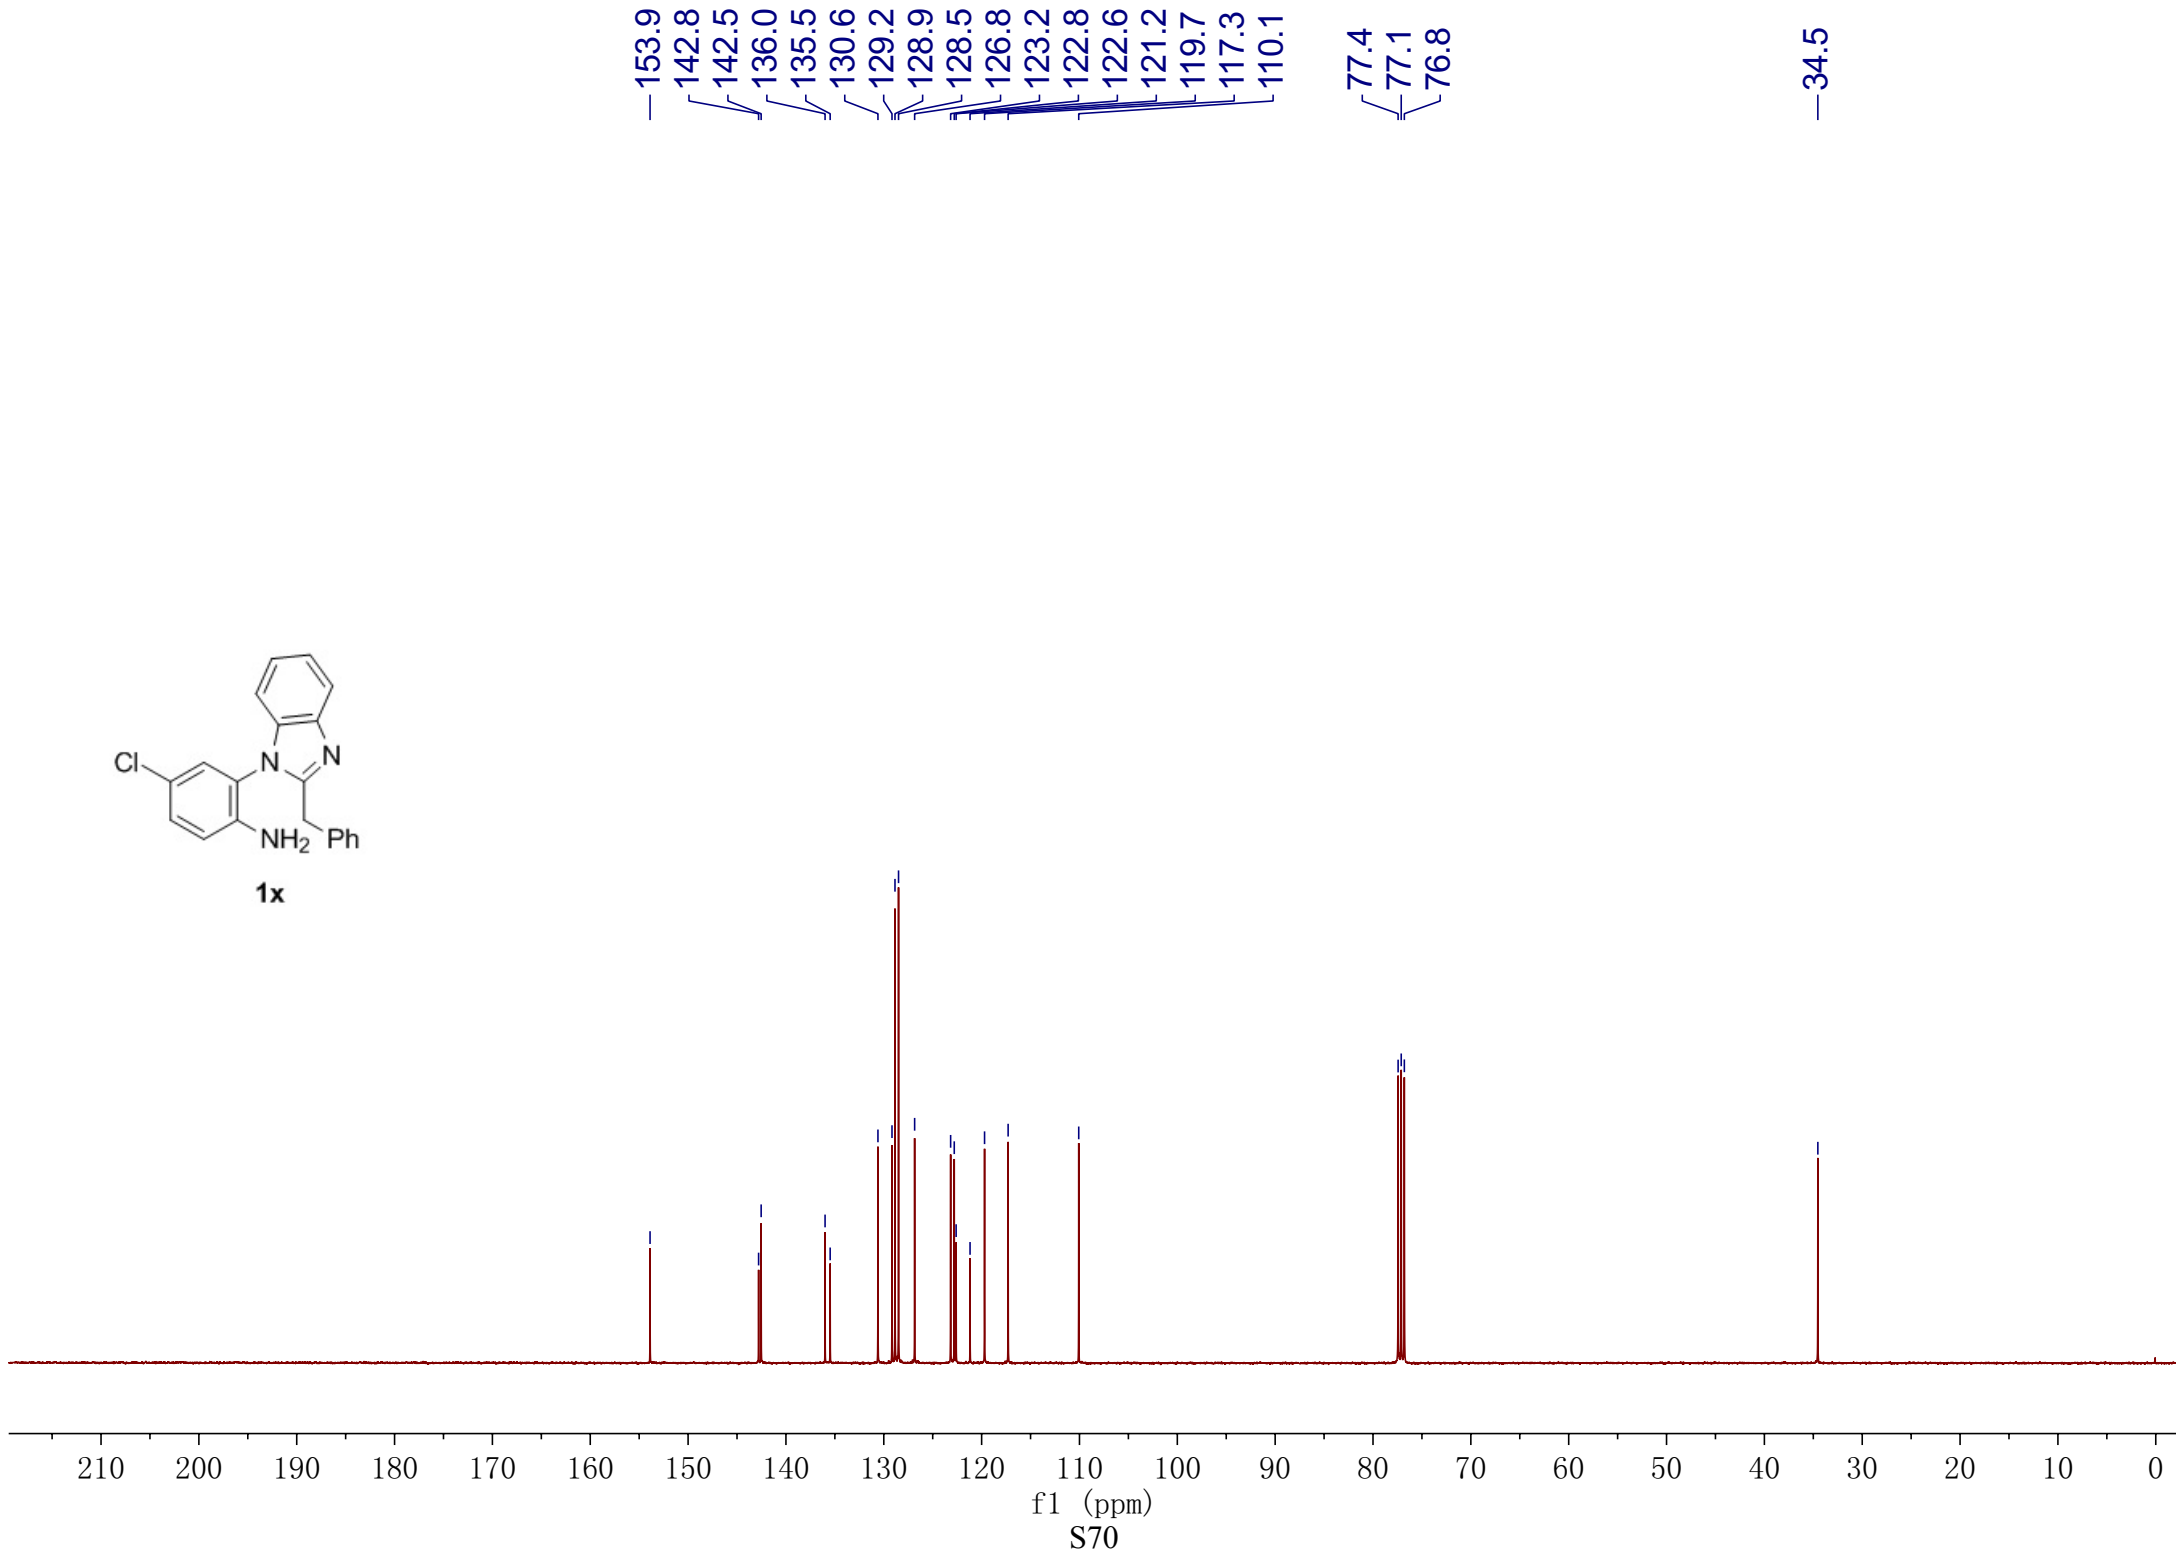

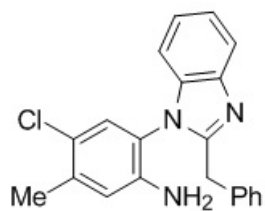

**1y**

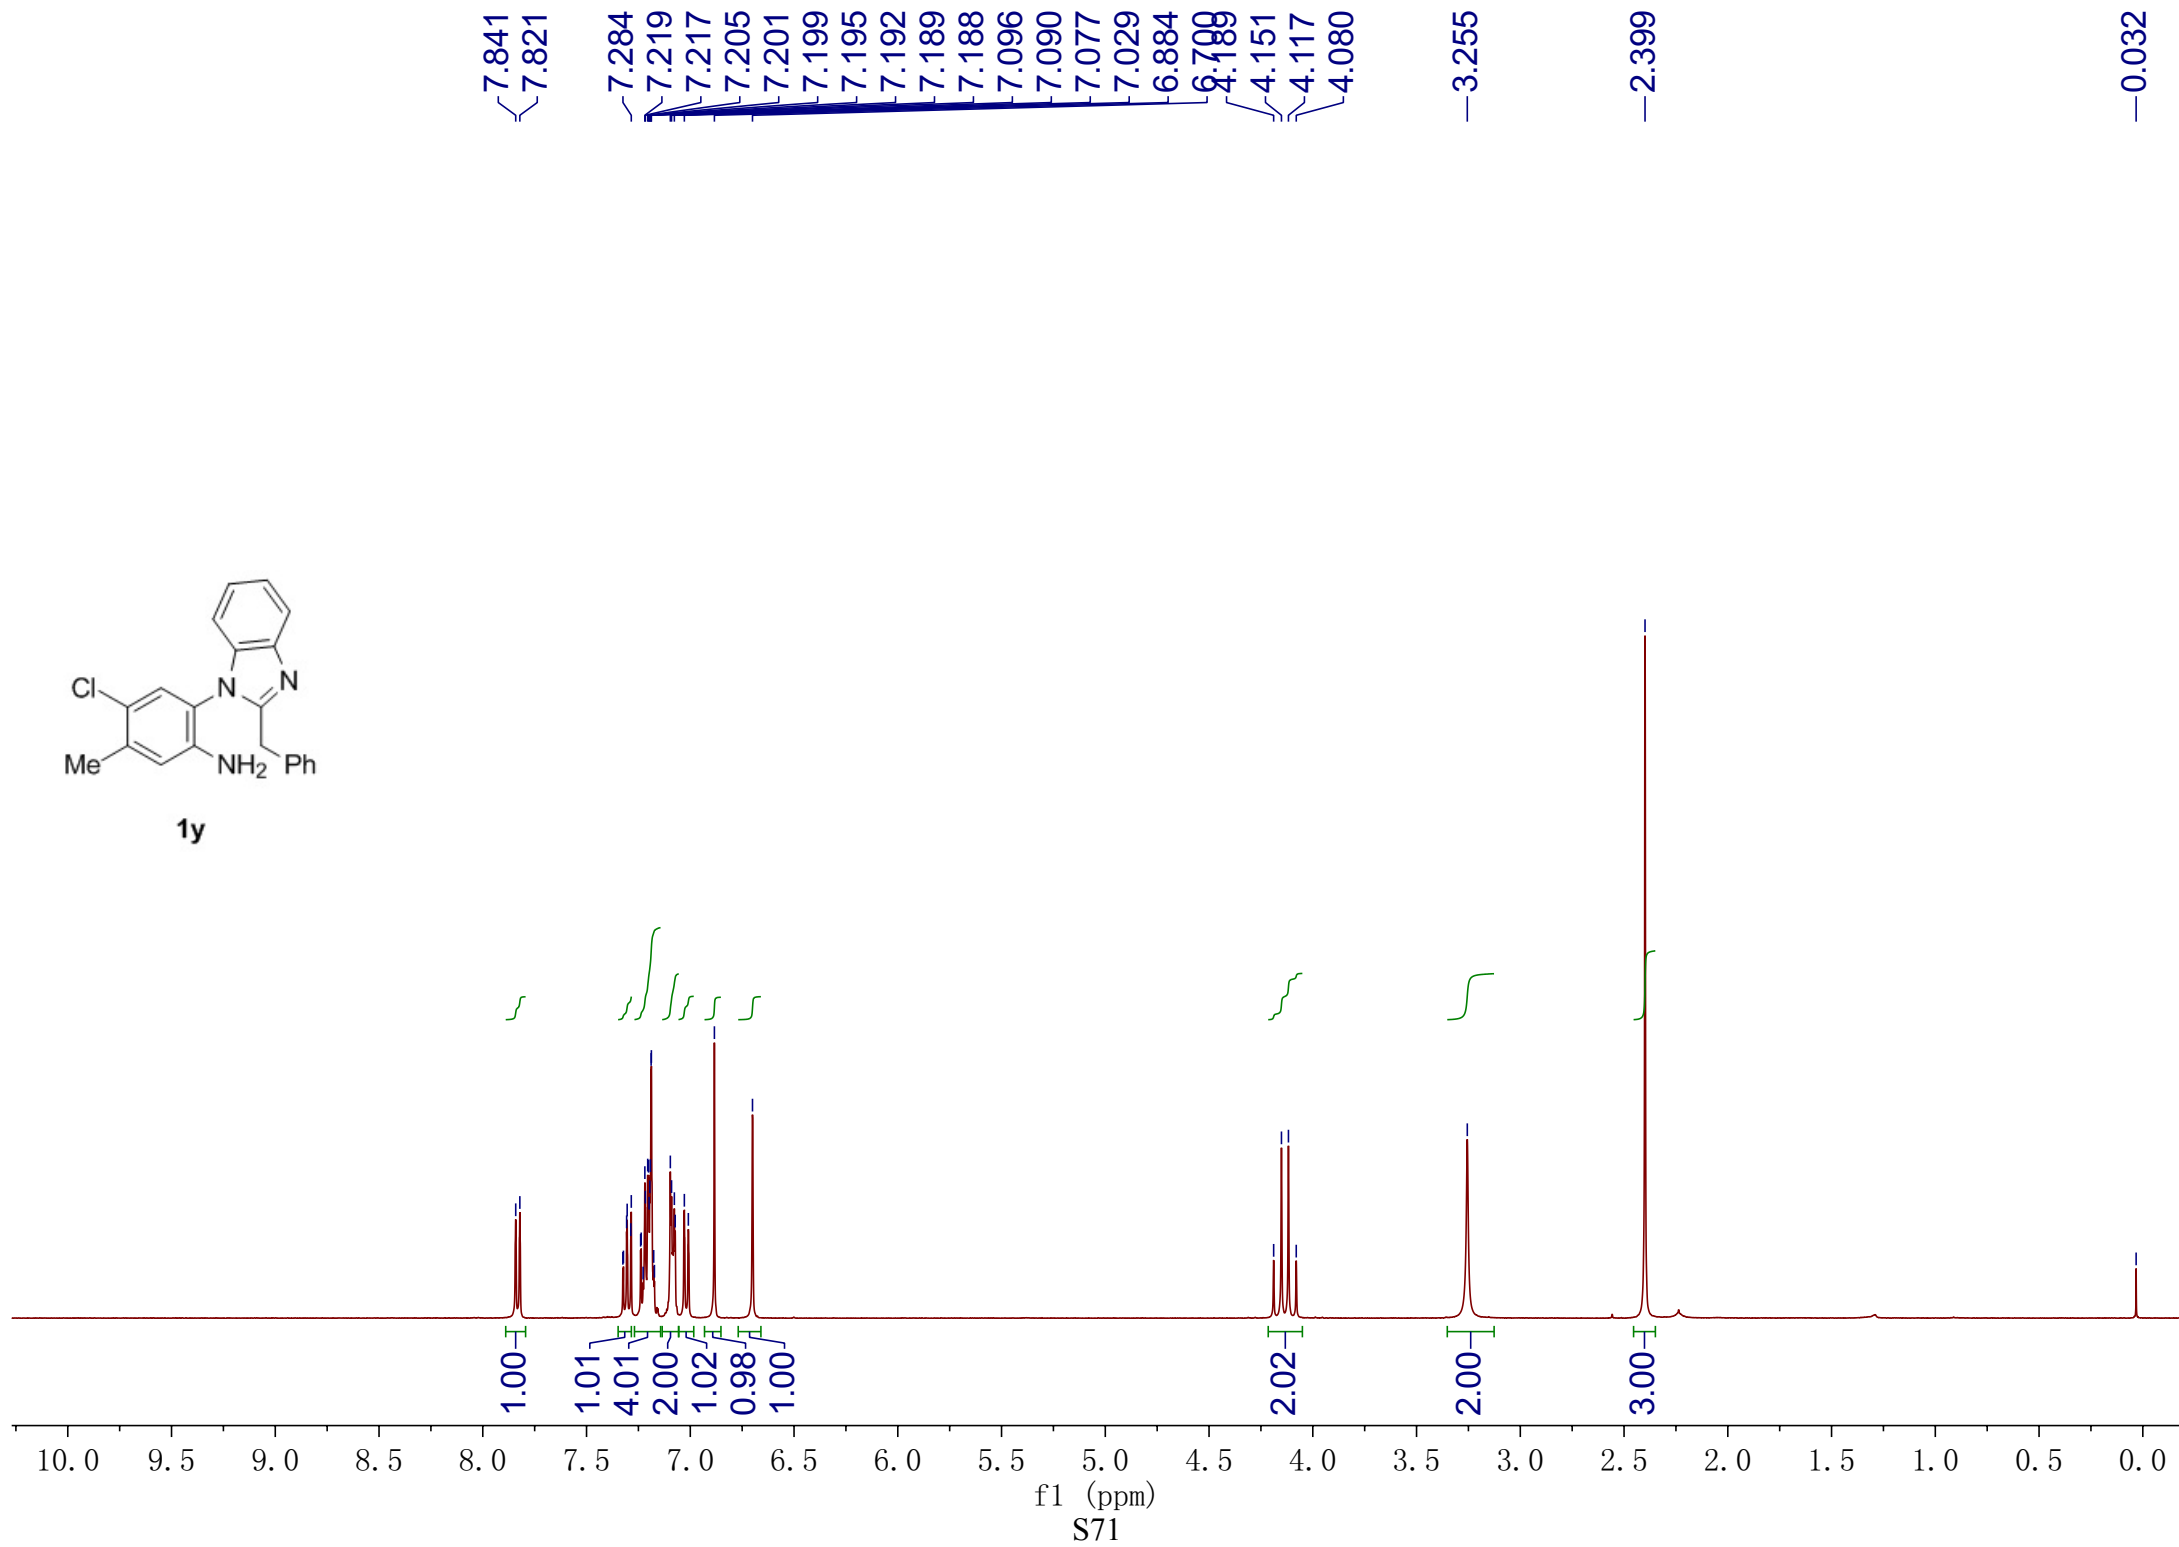

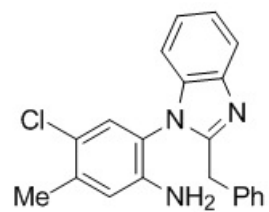

**1y**

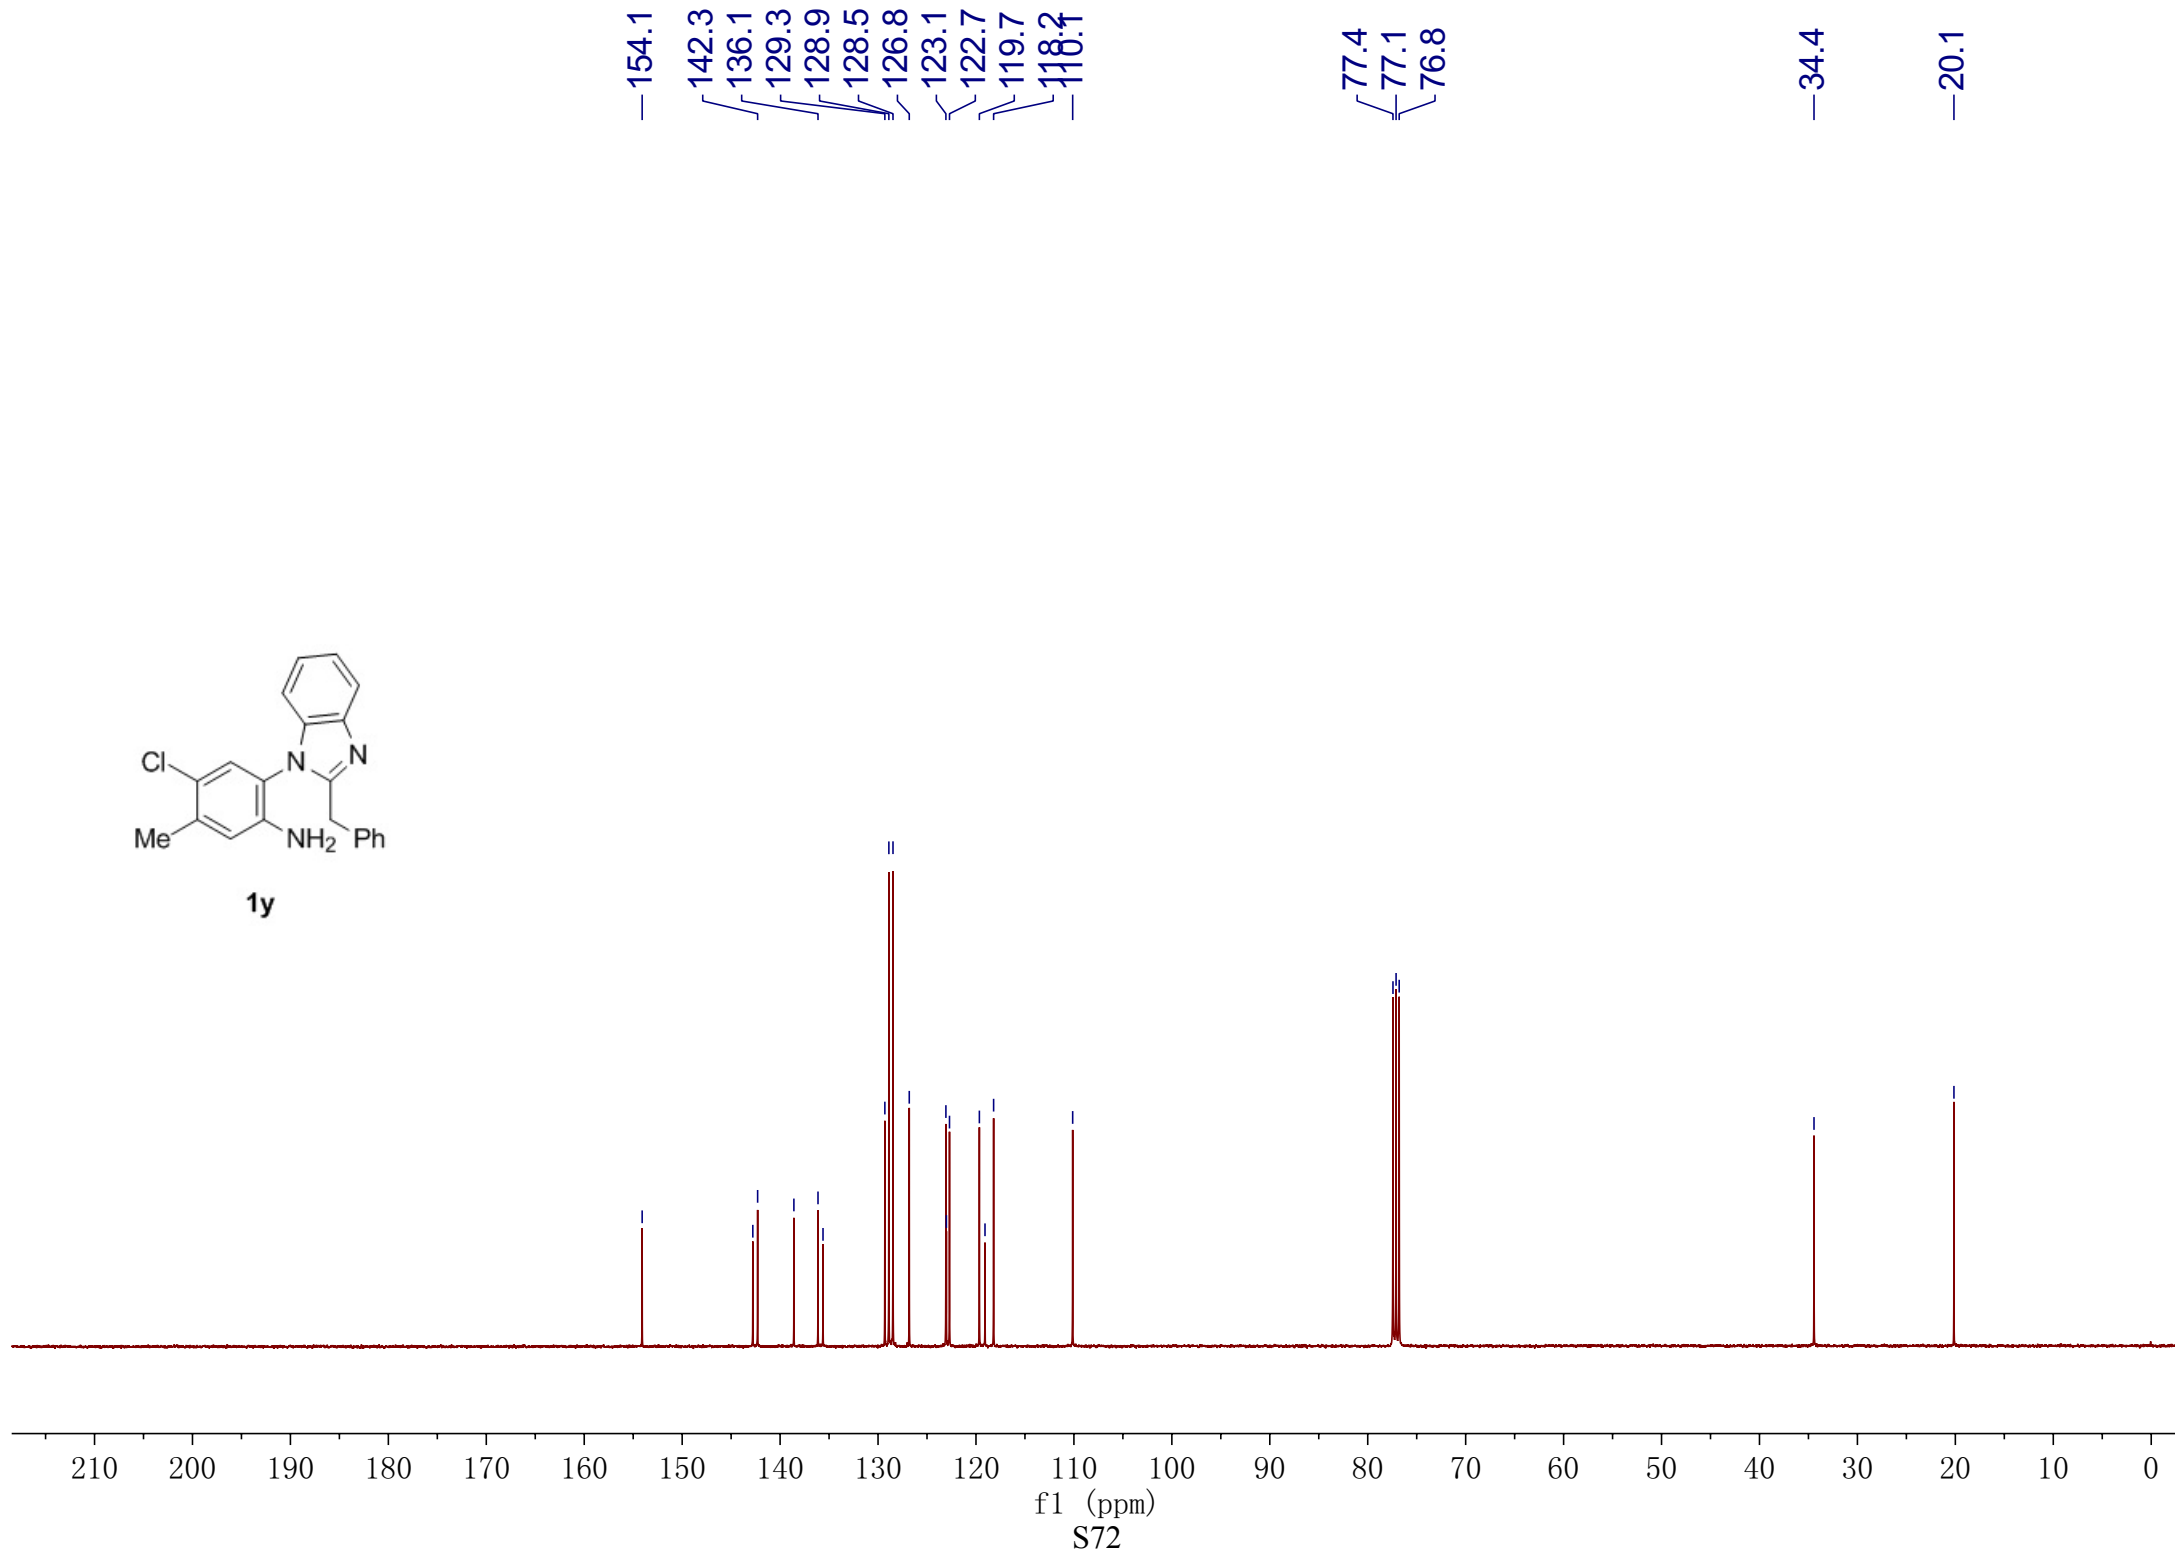

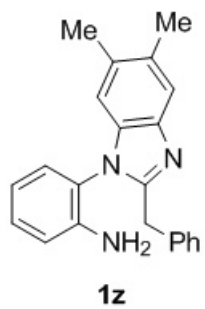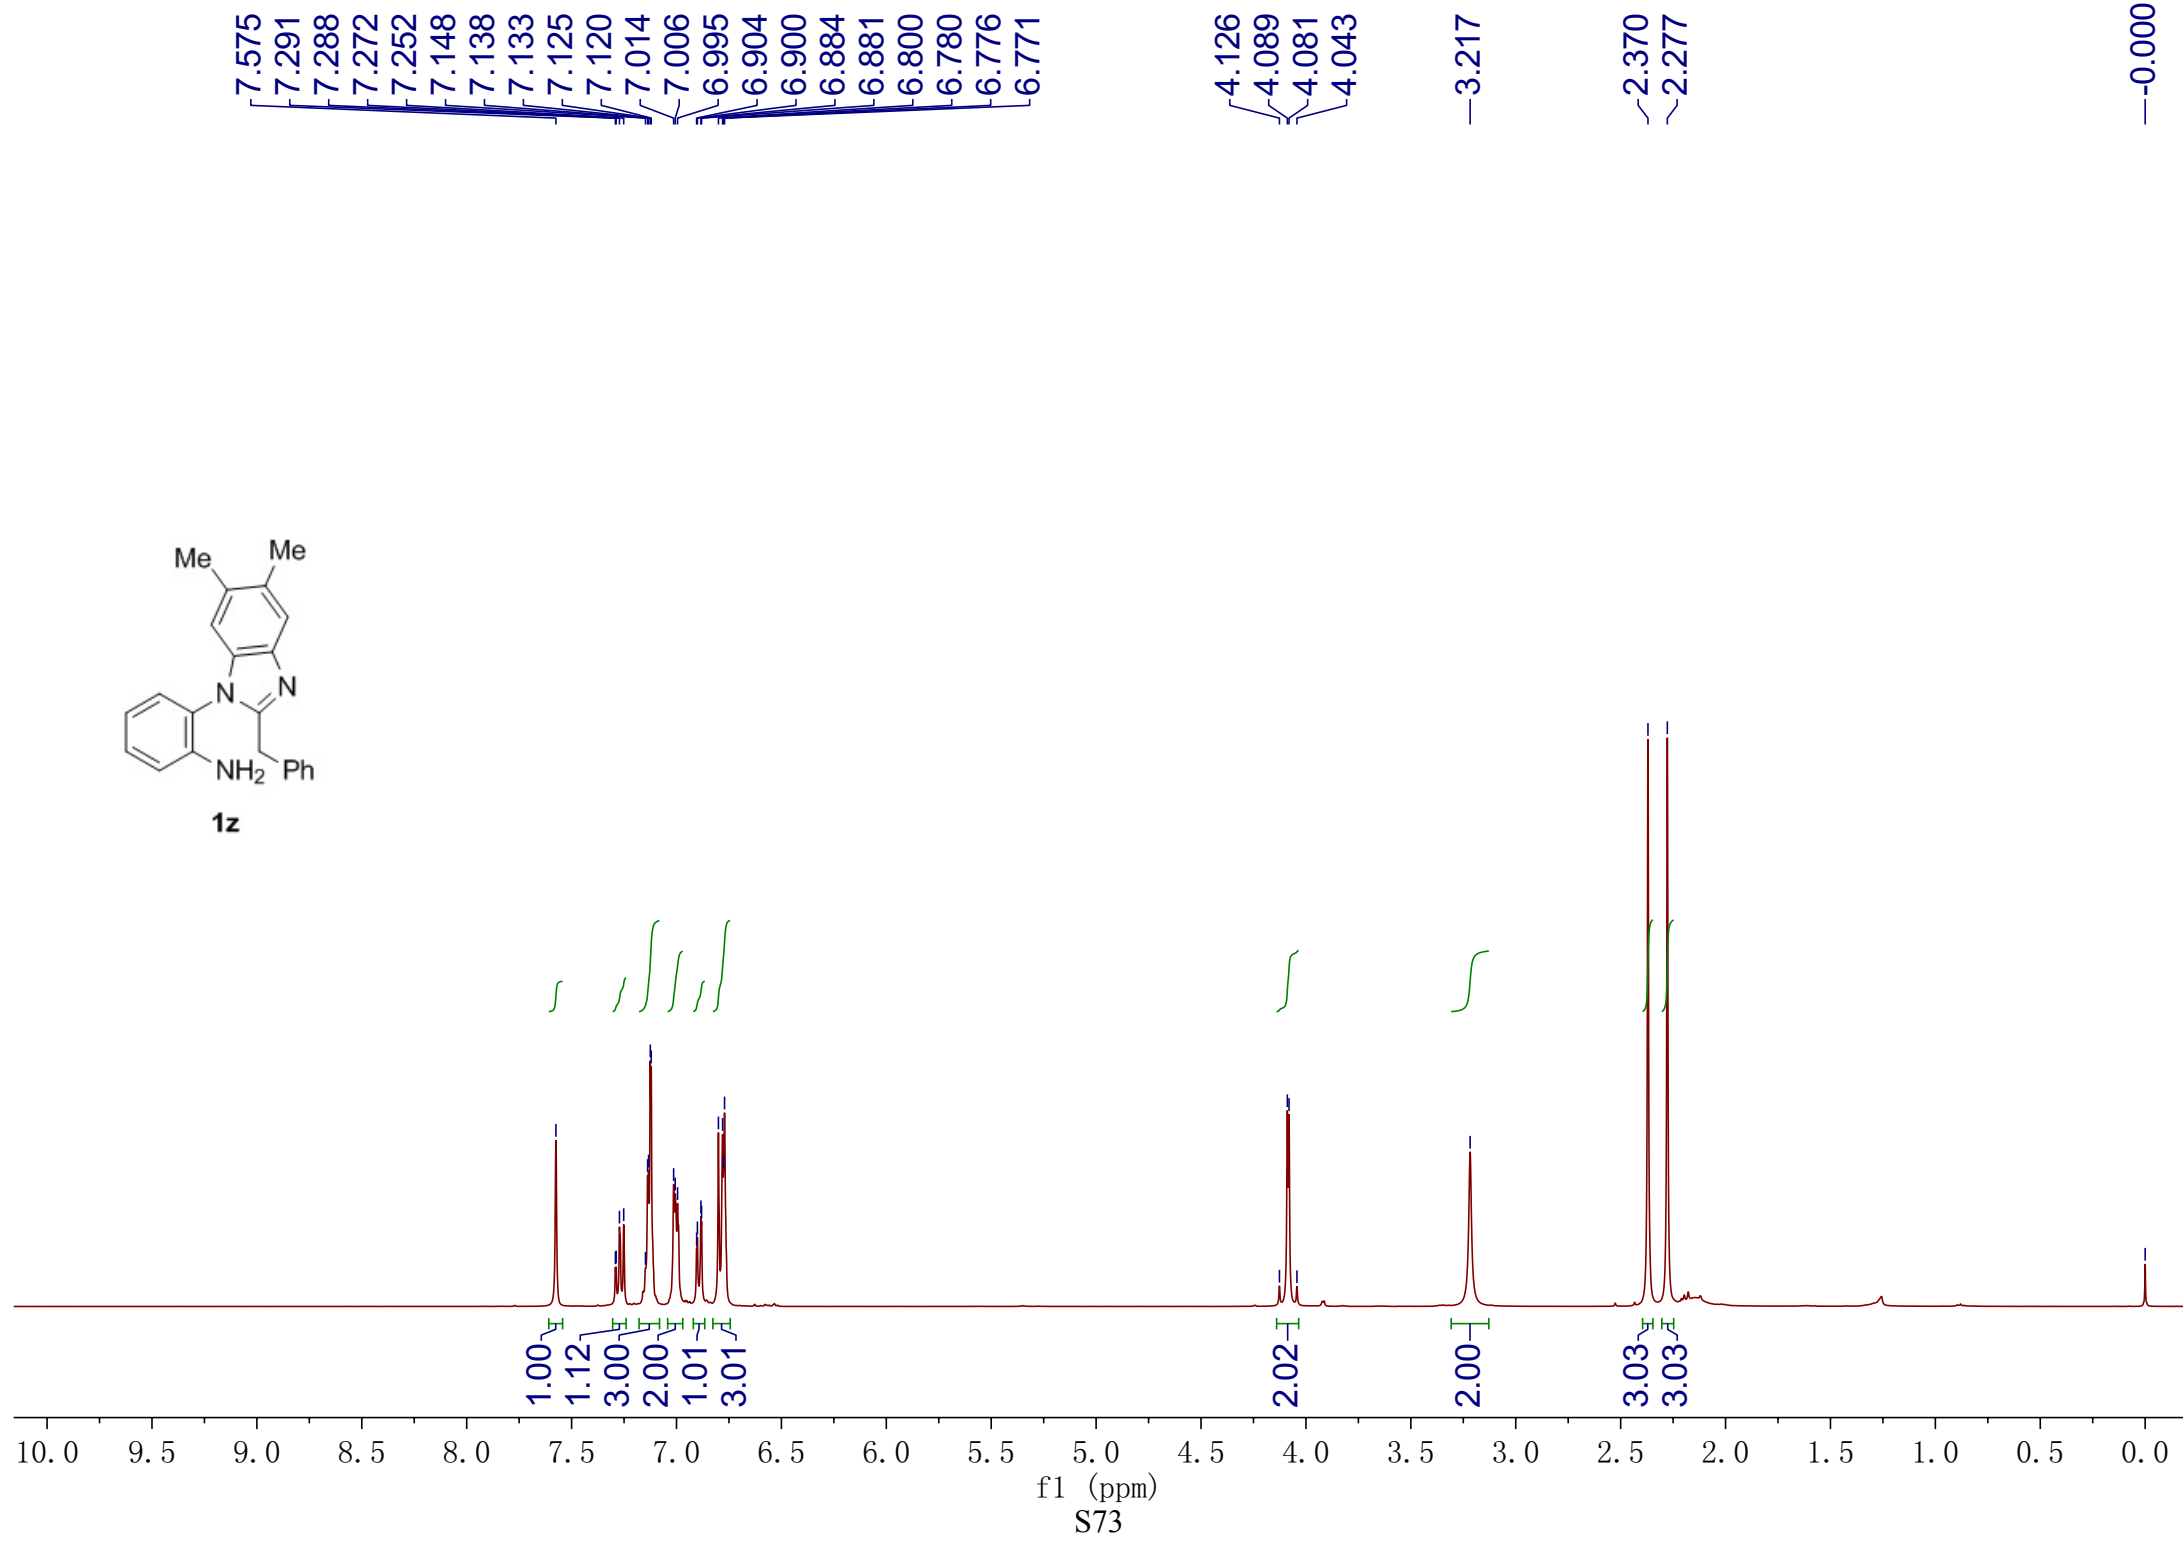

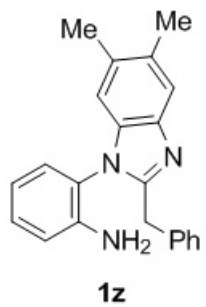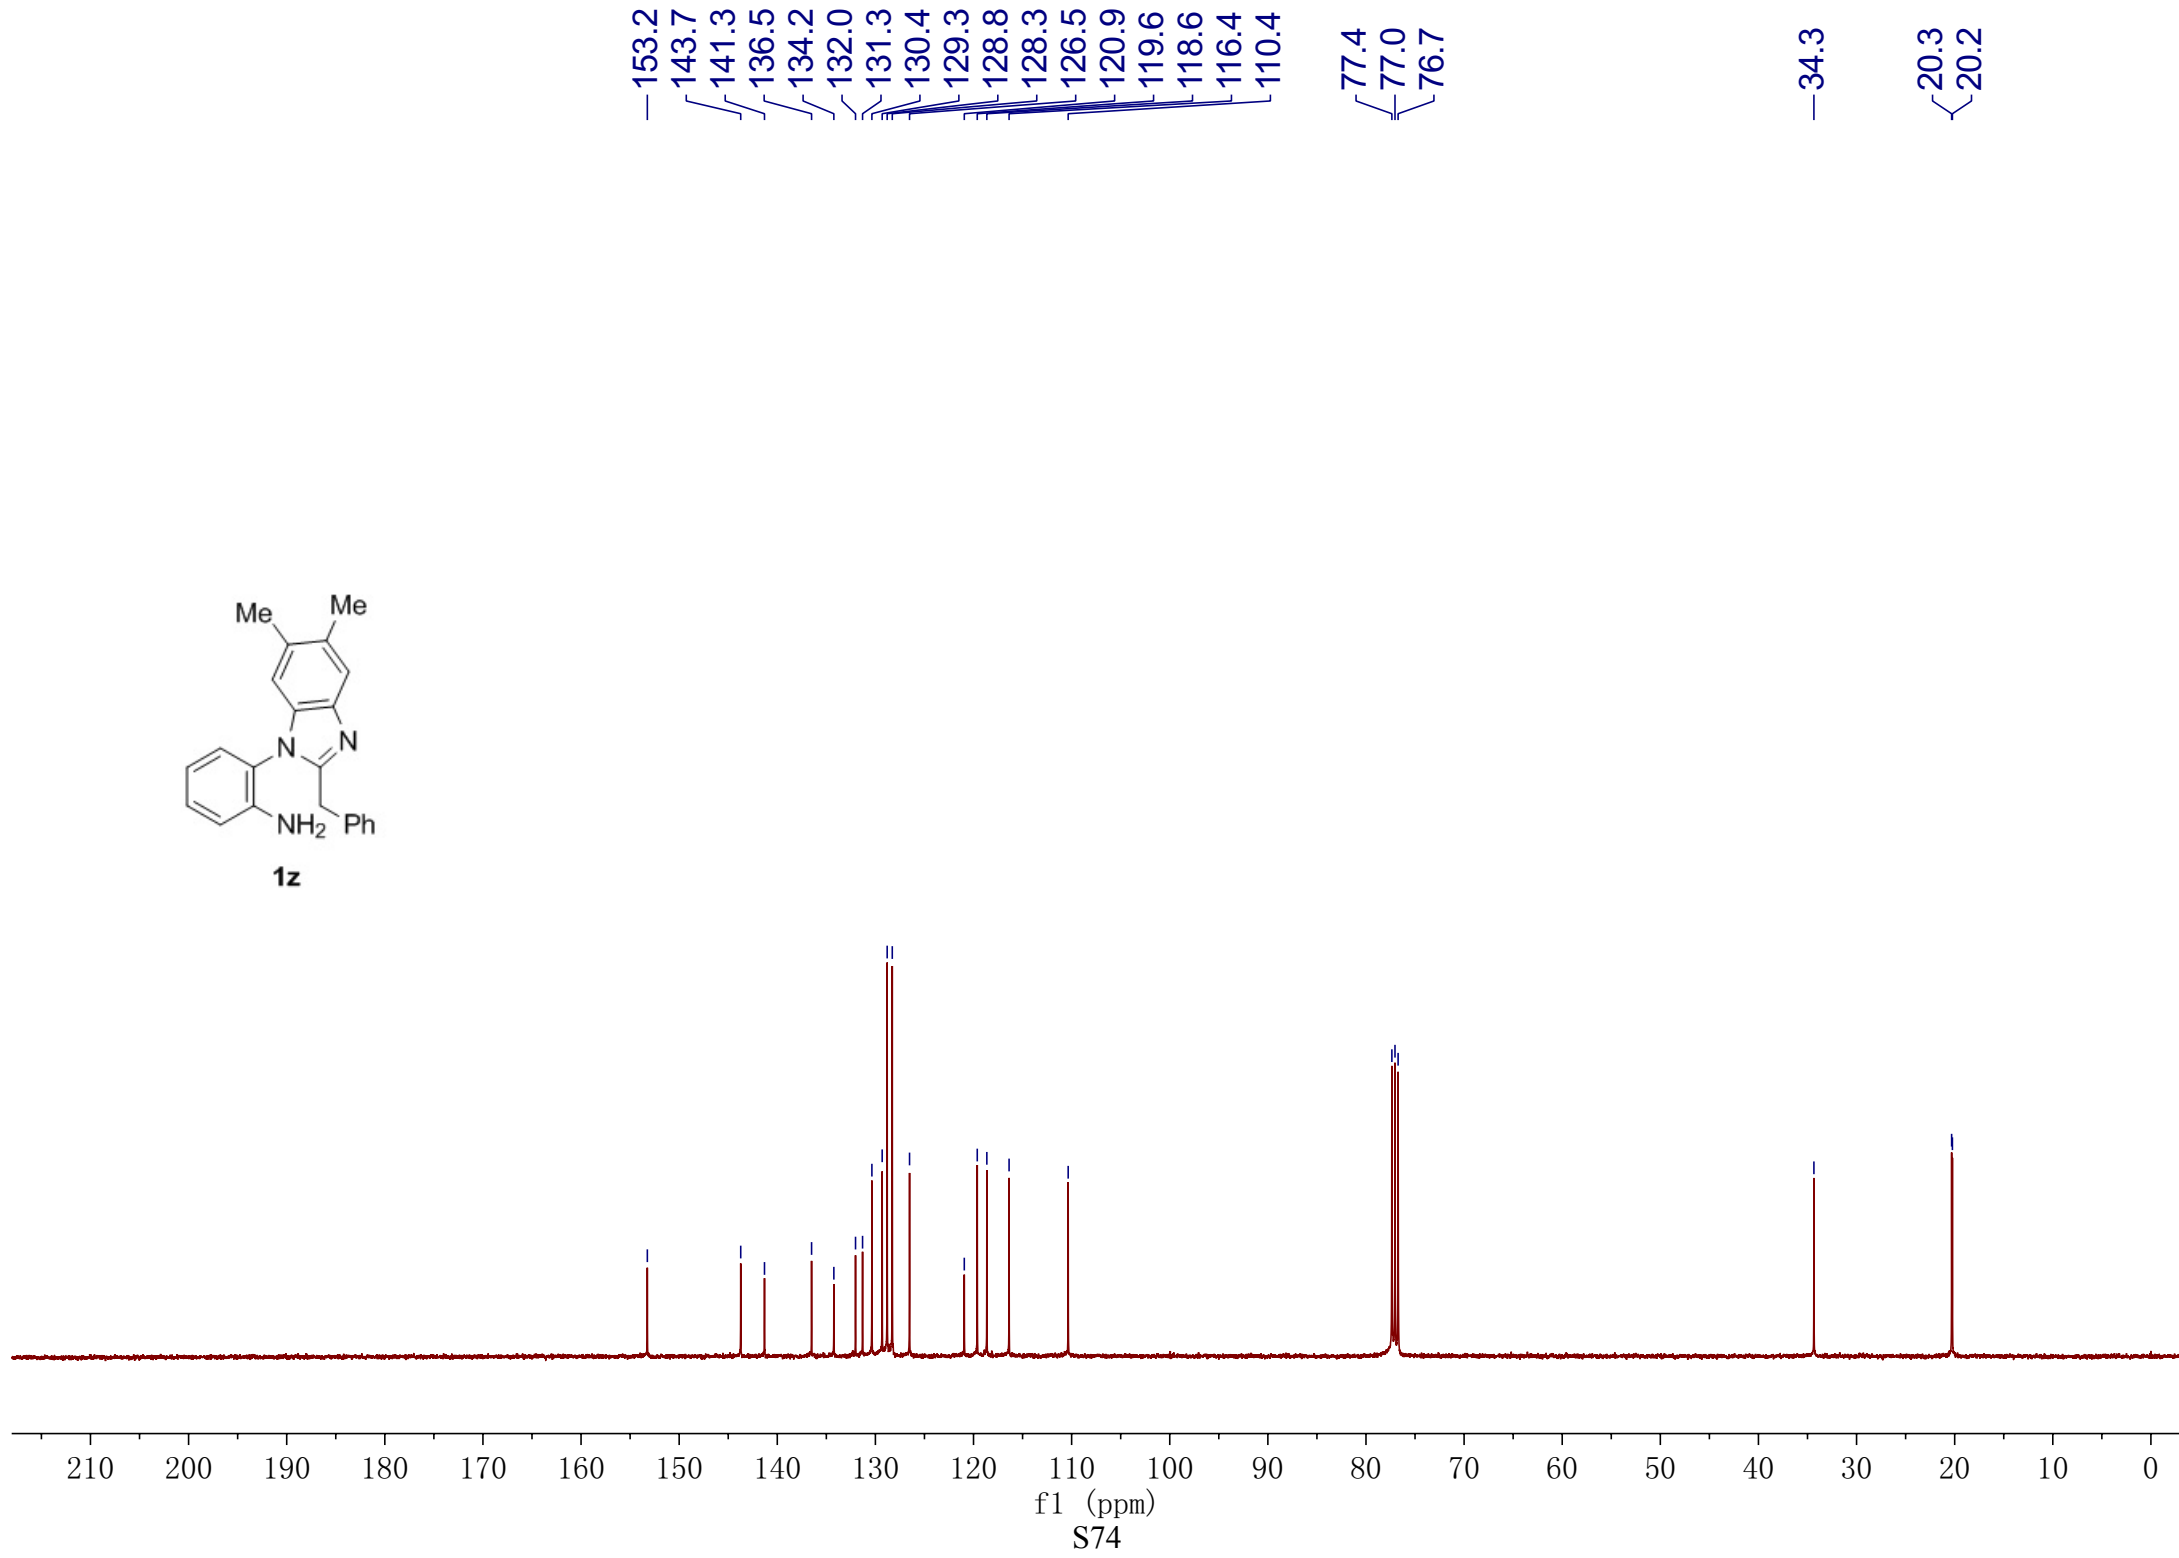

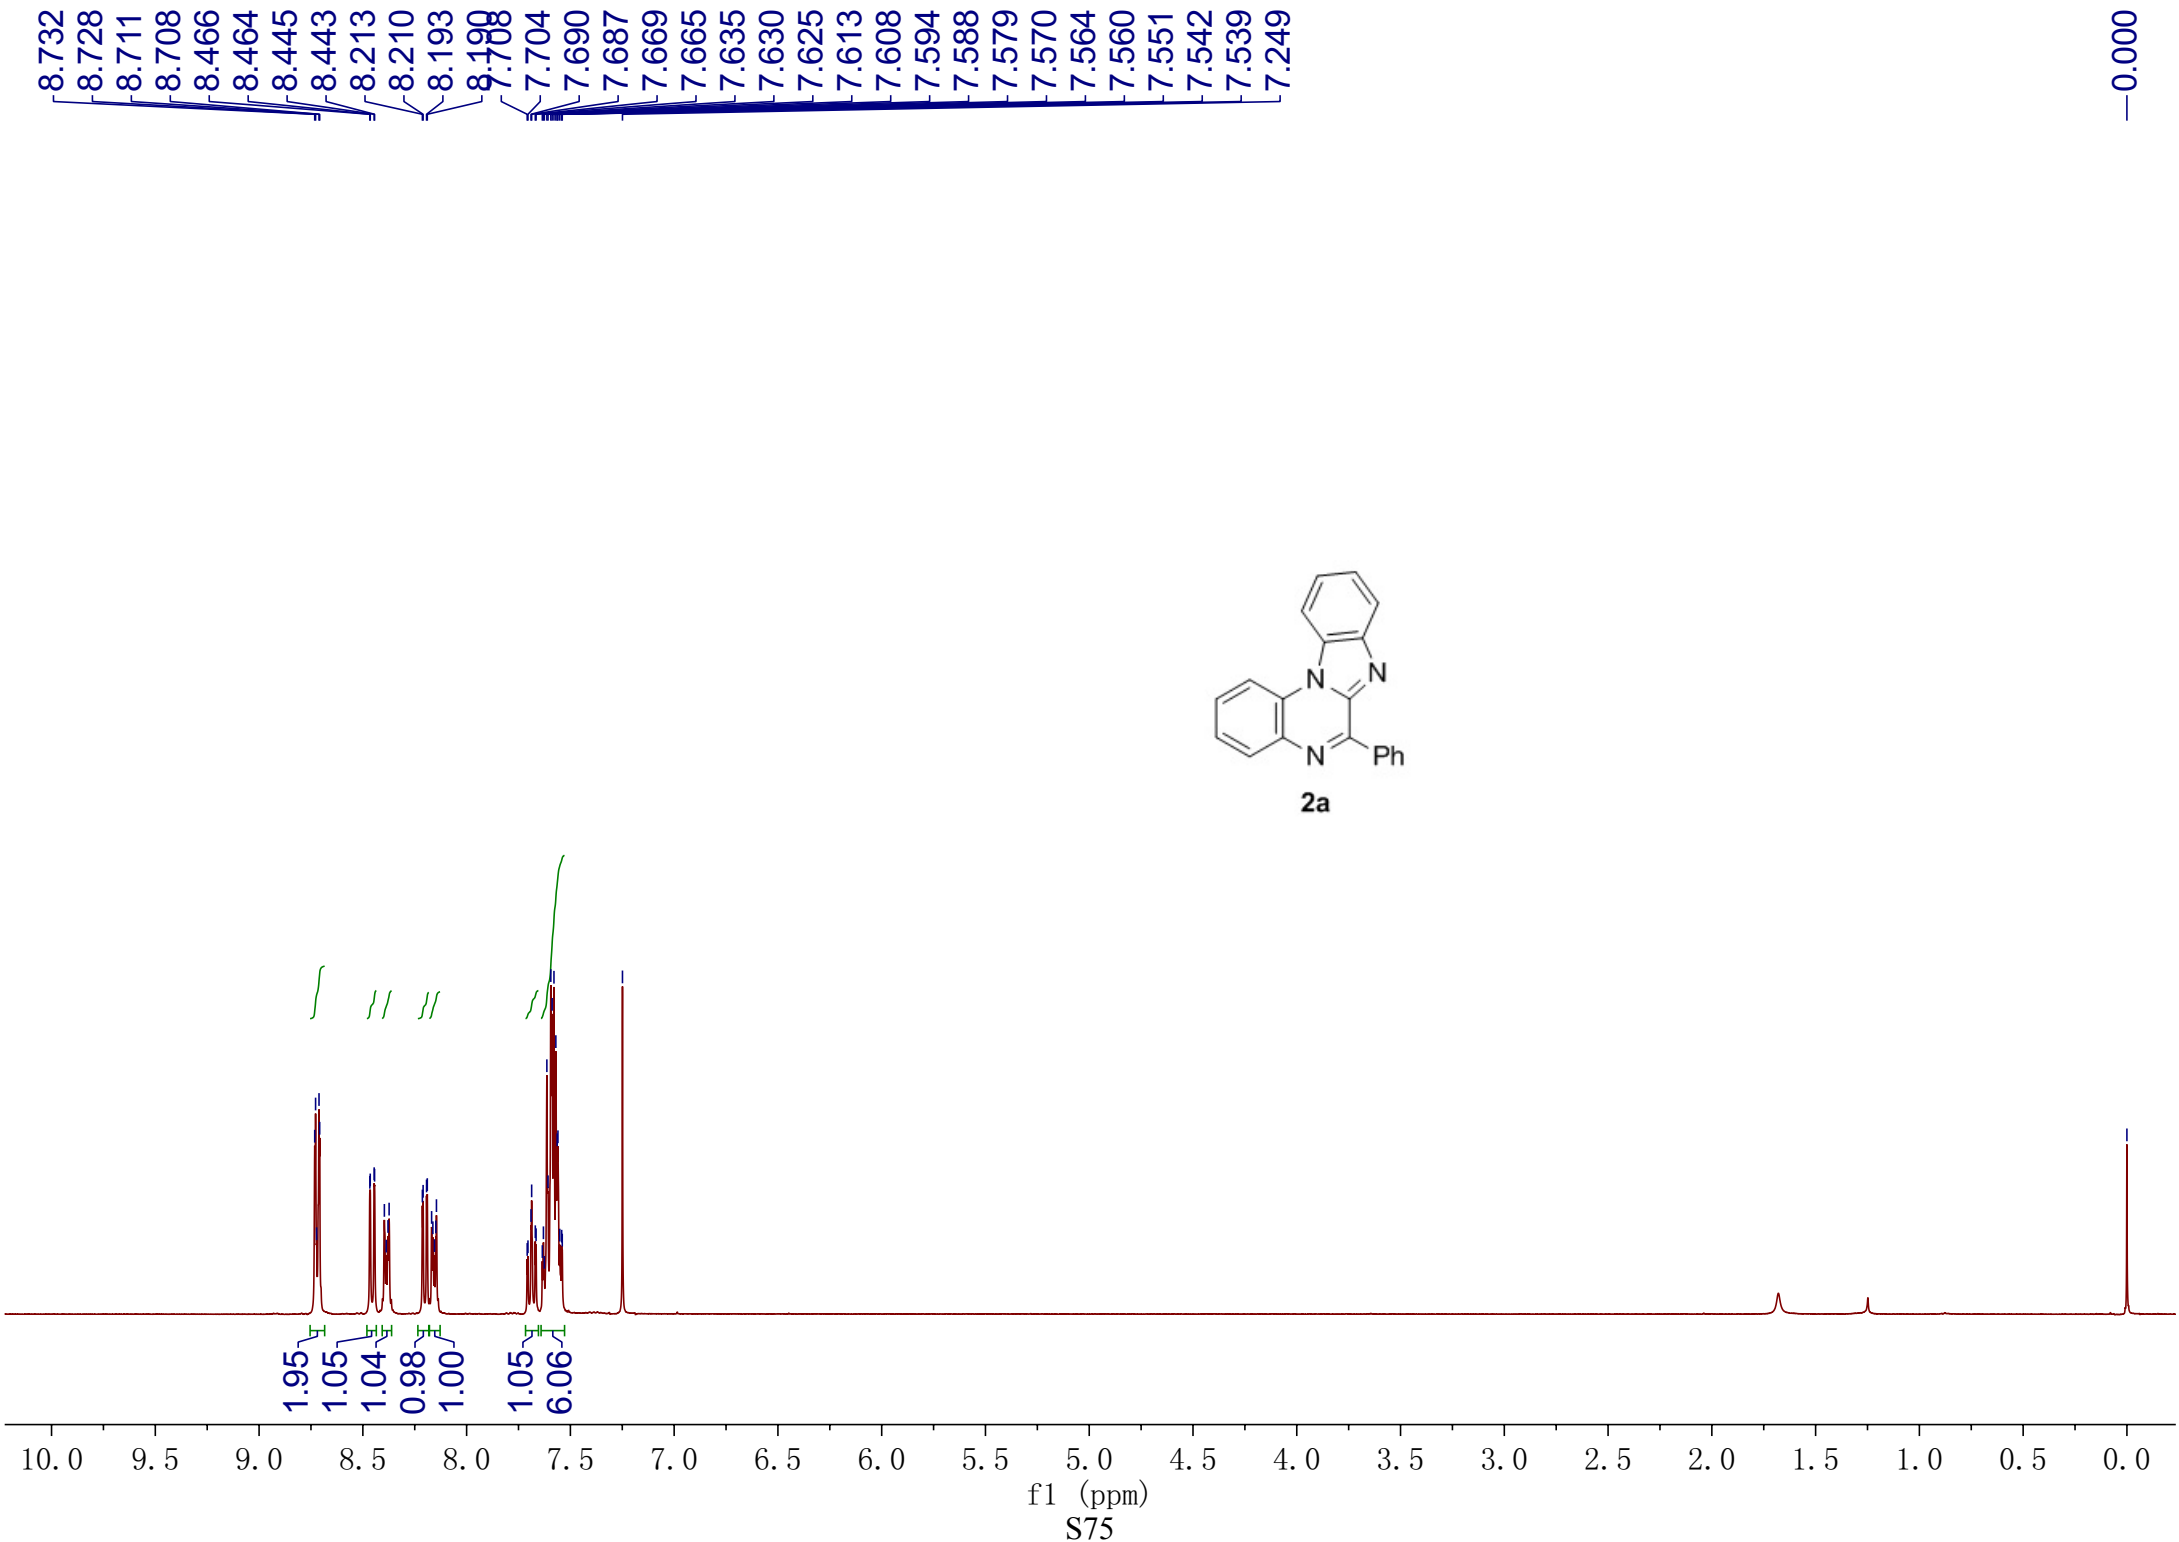

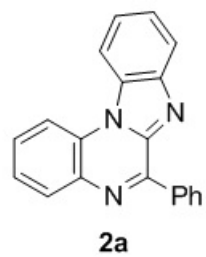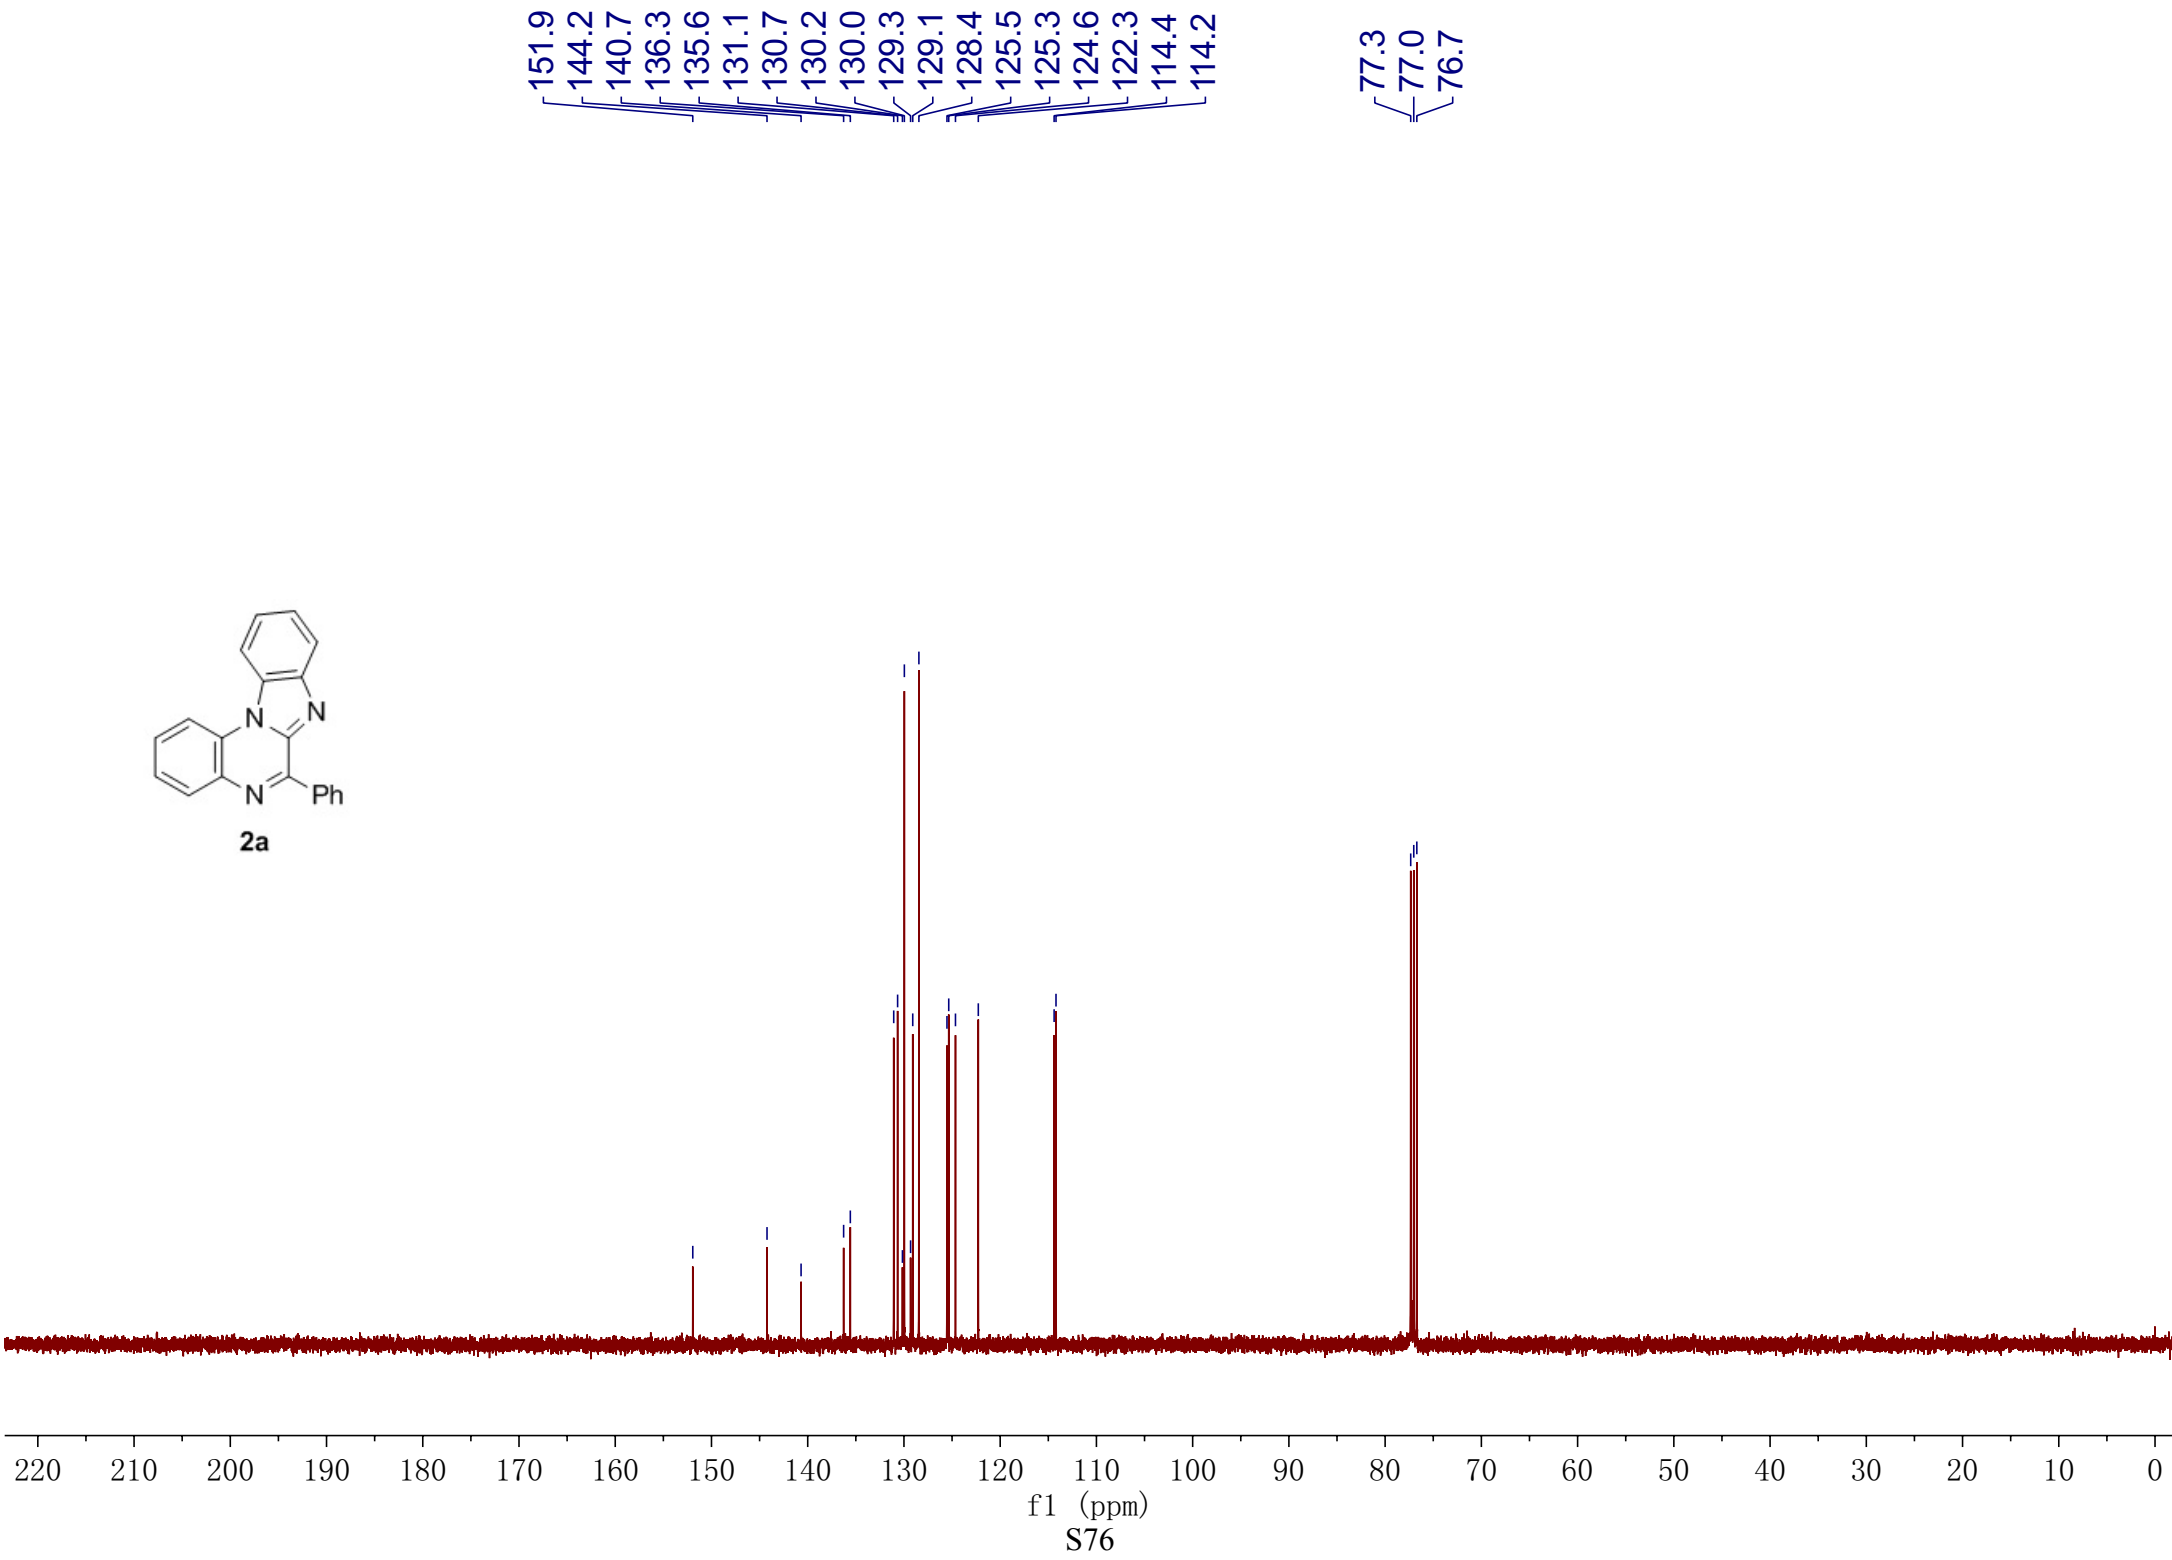



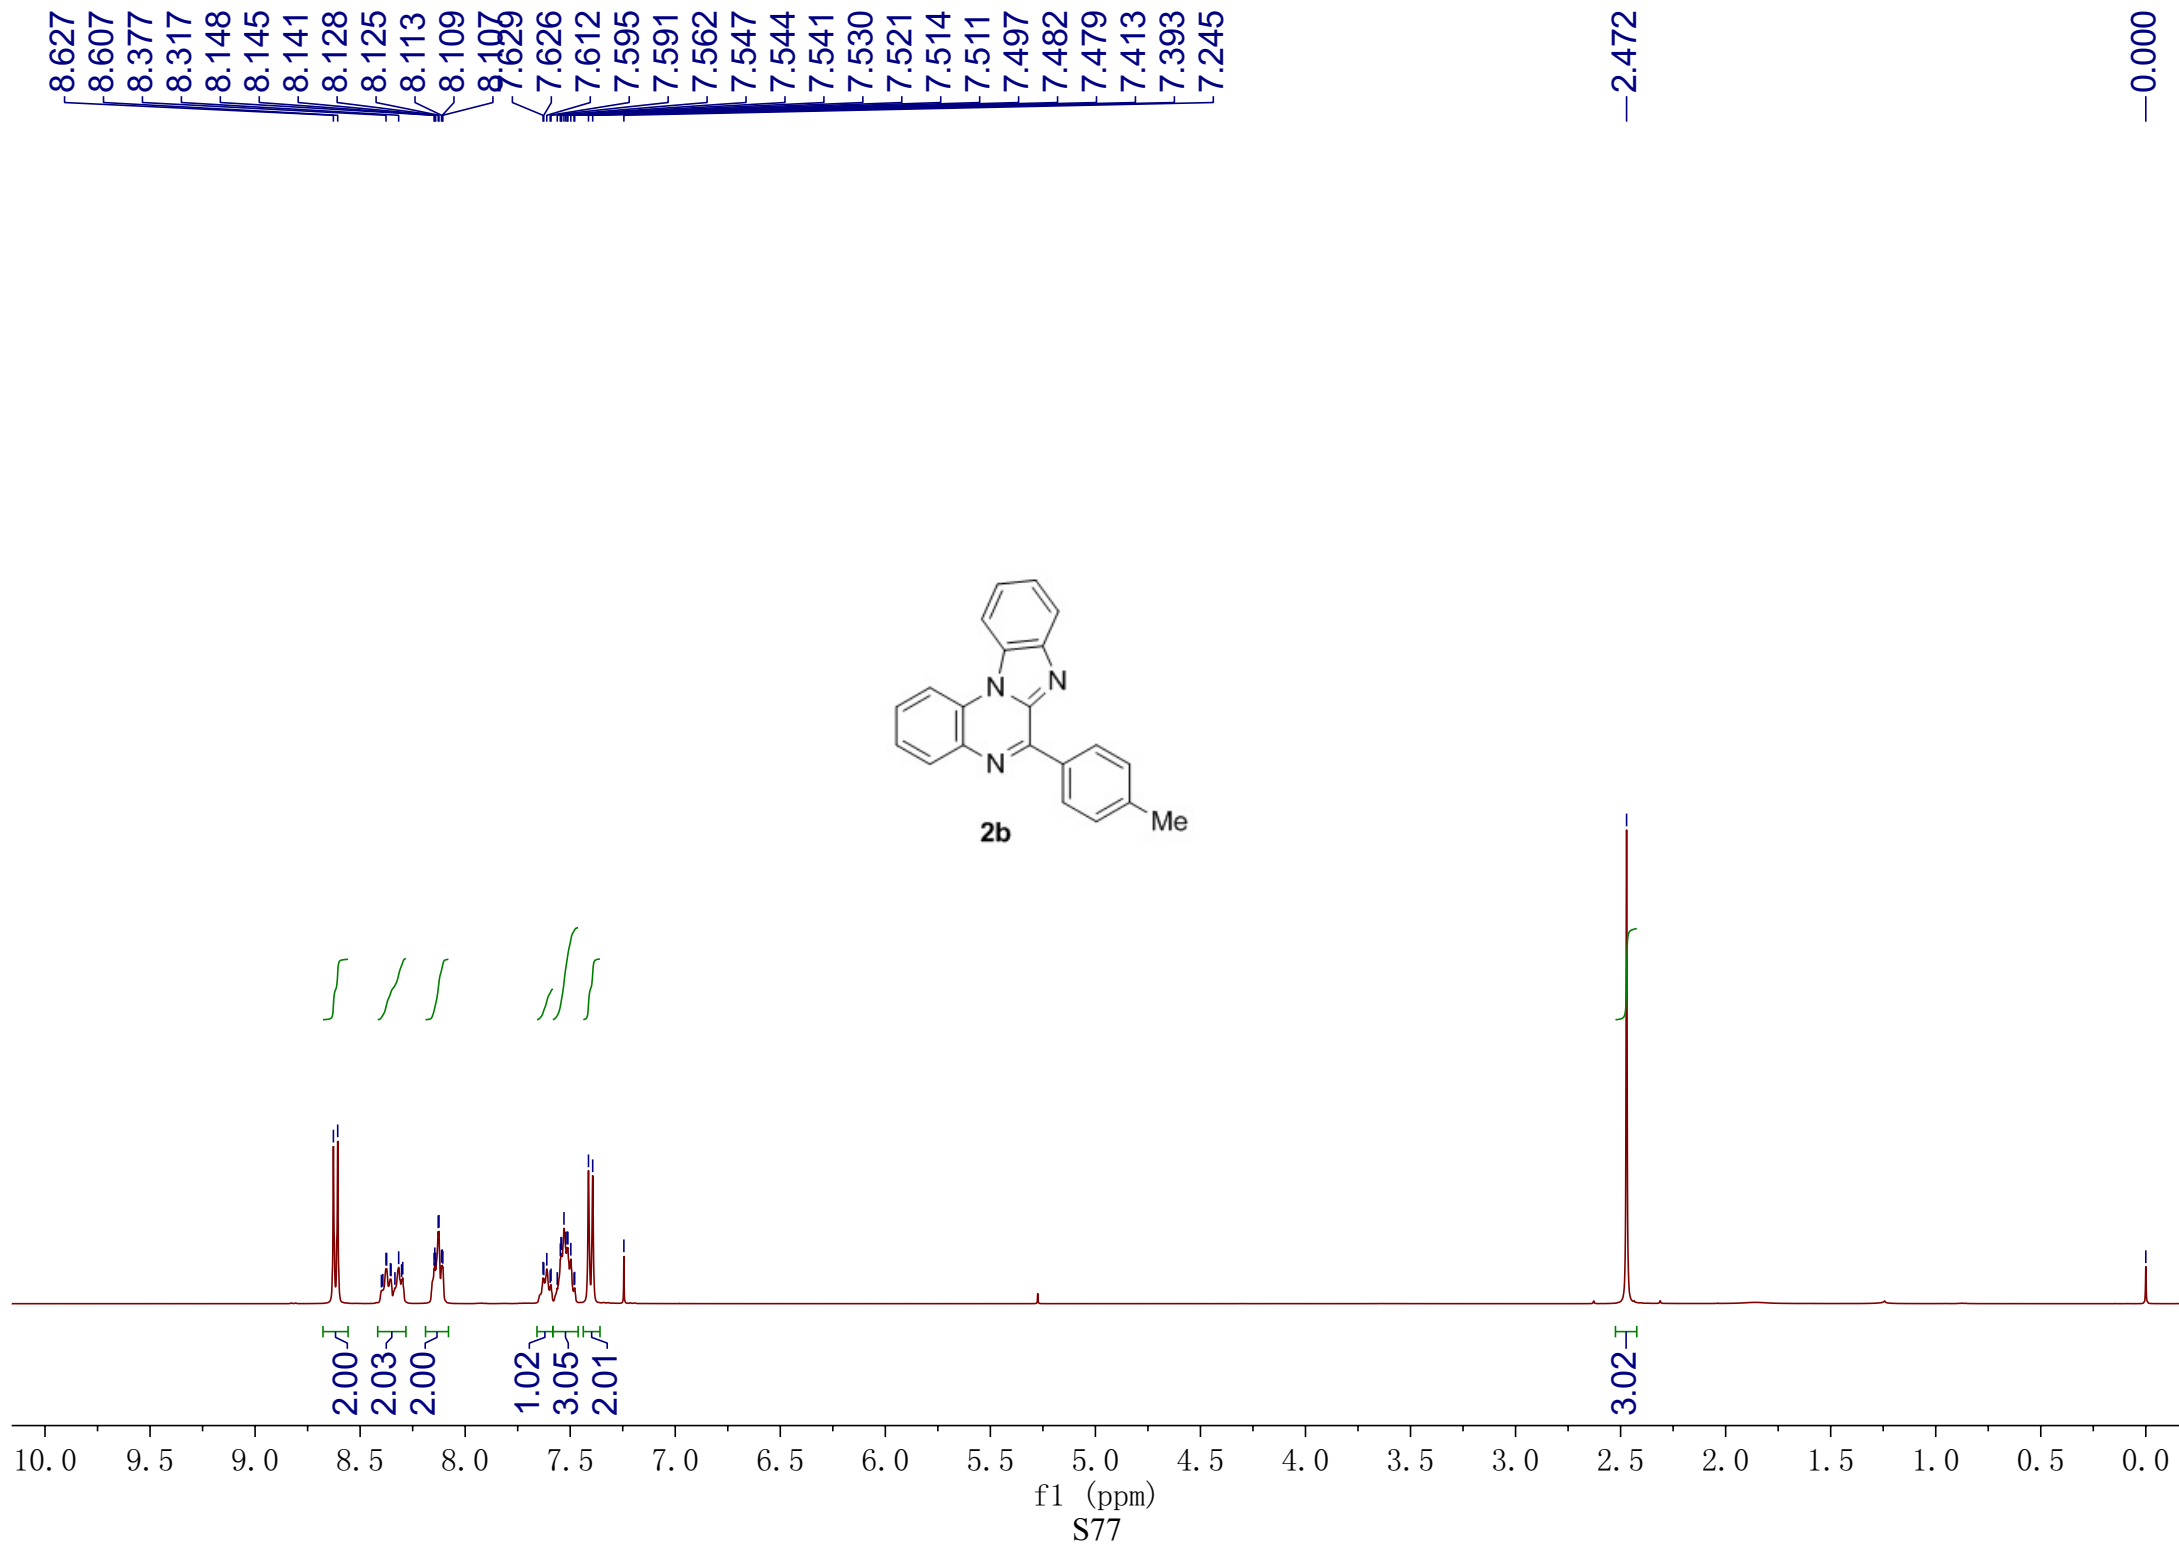

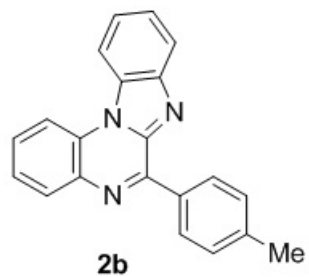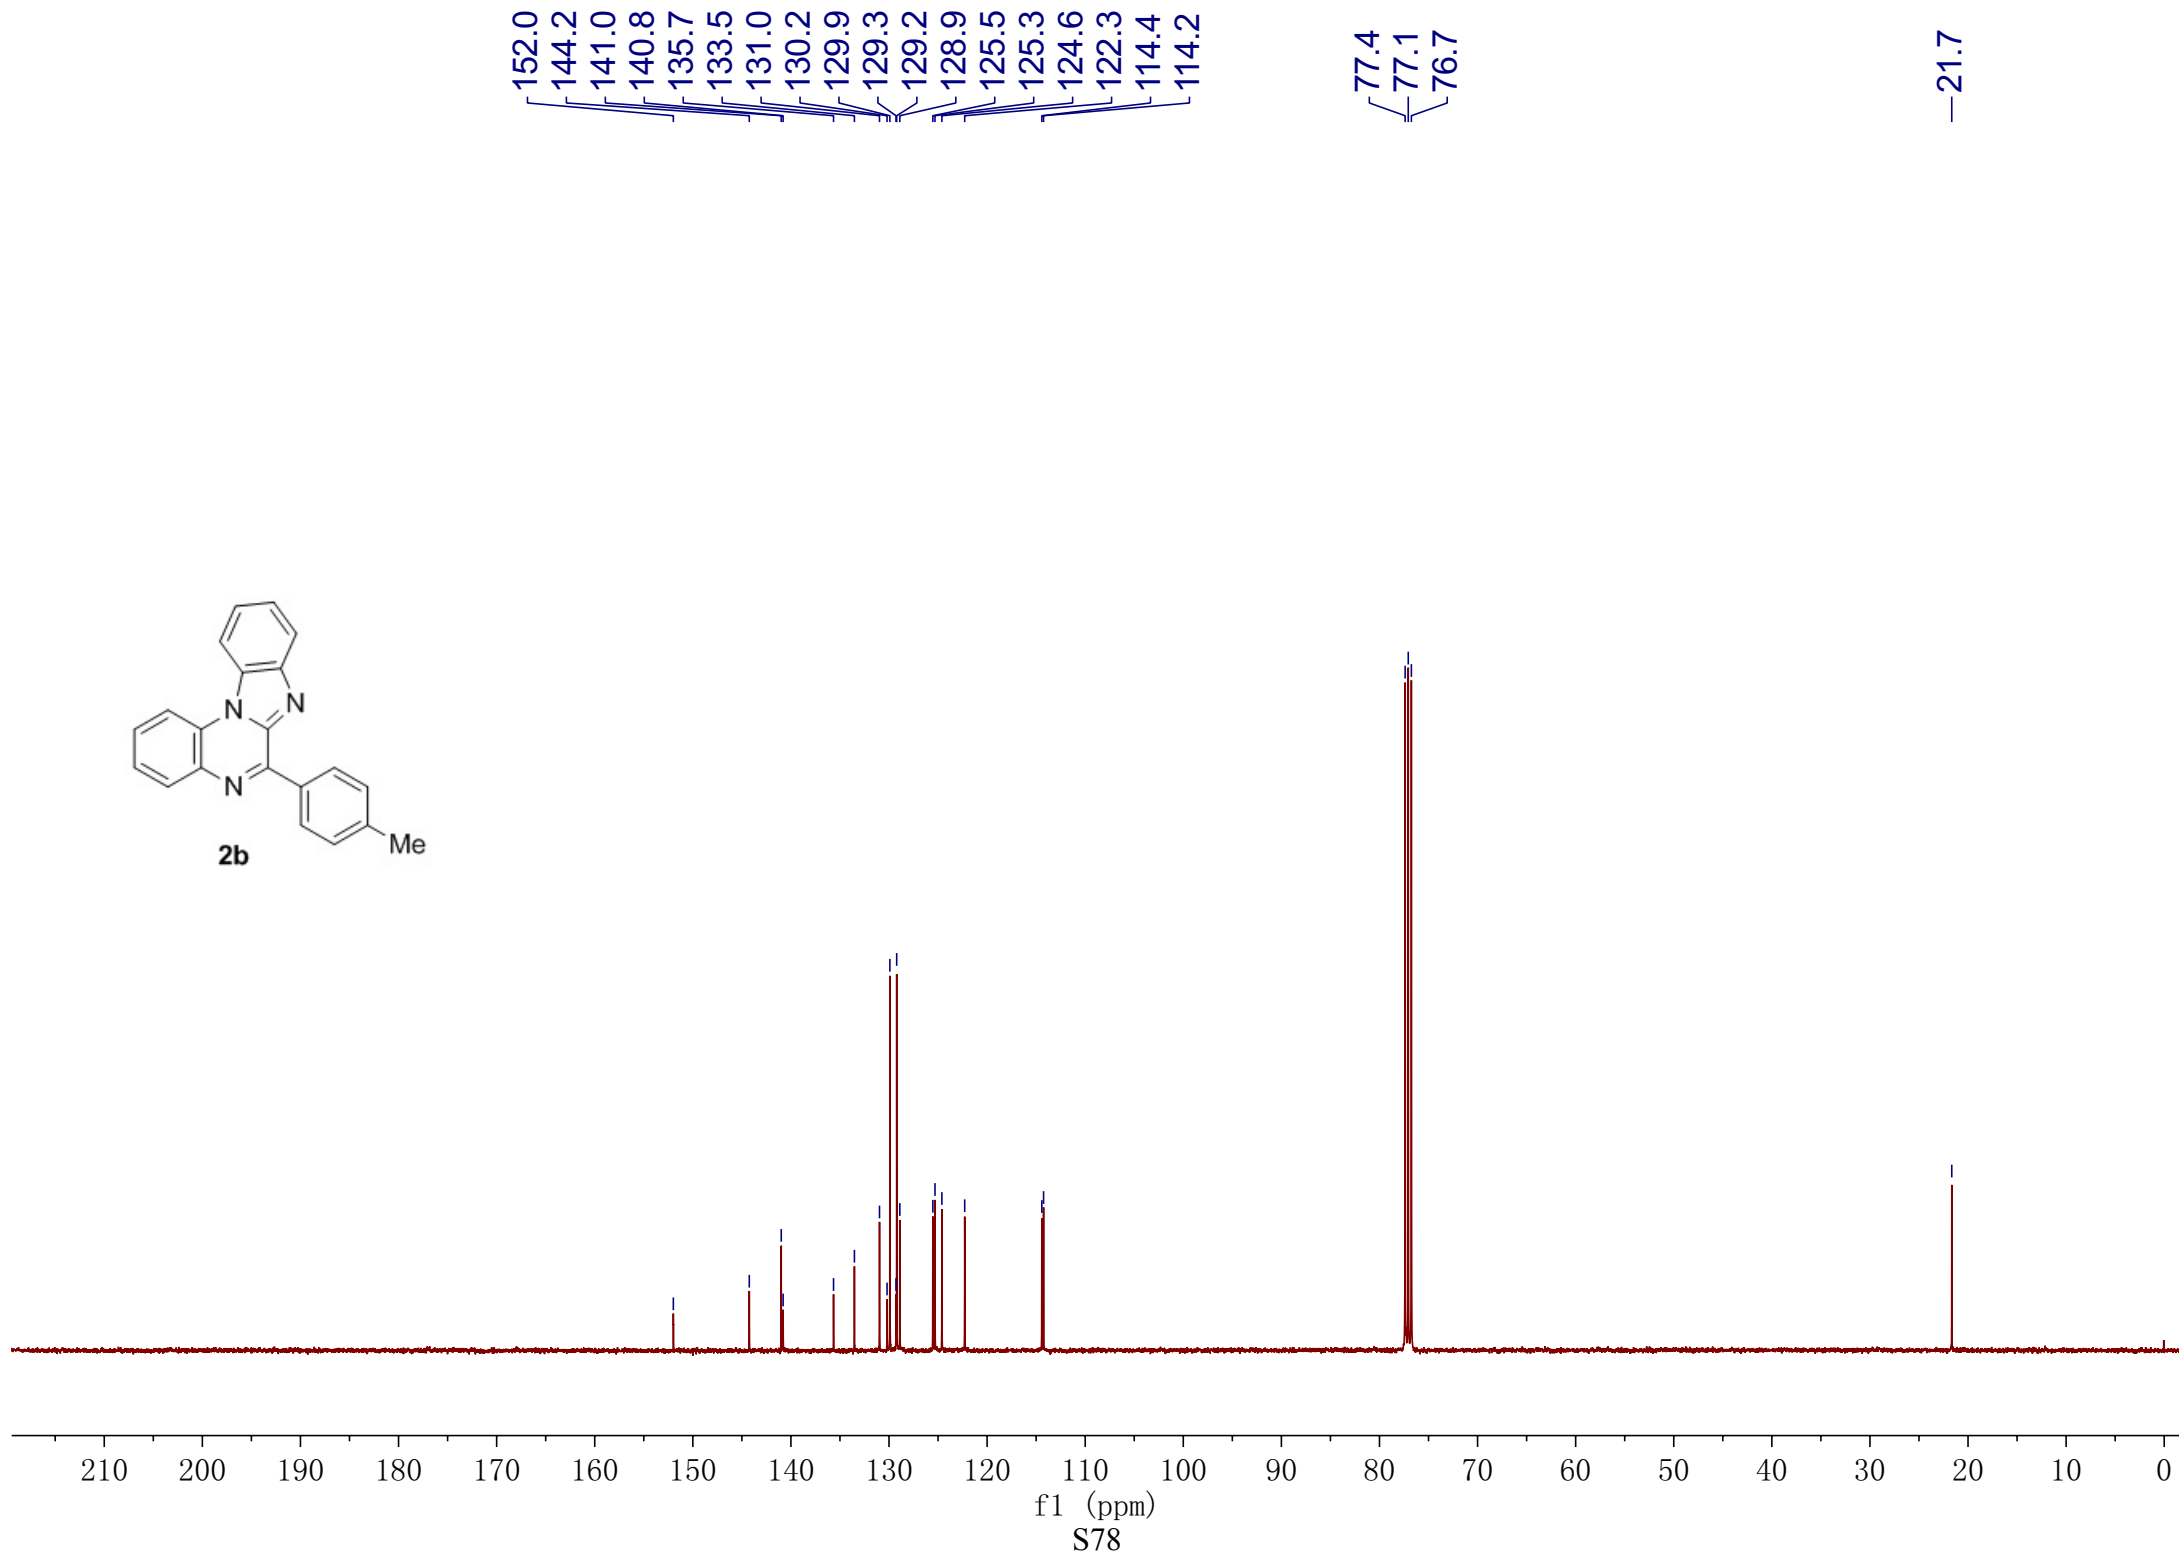

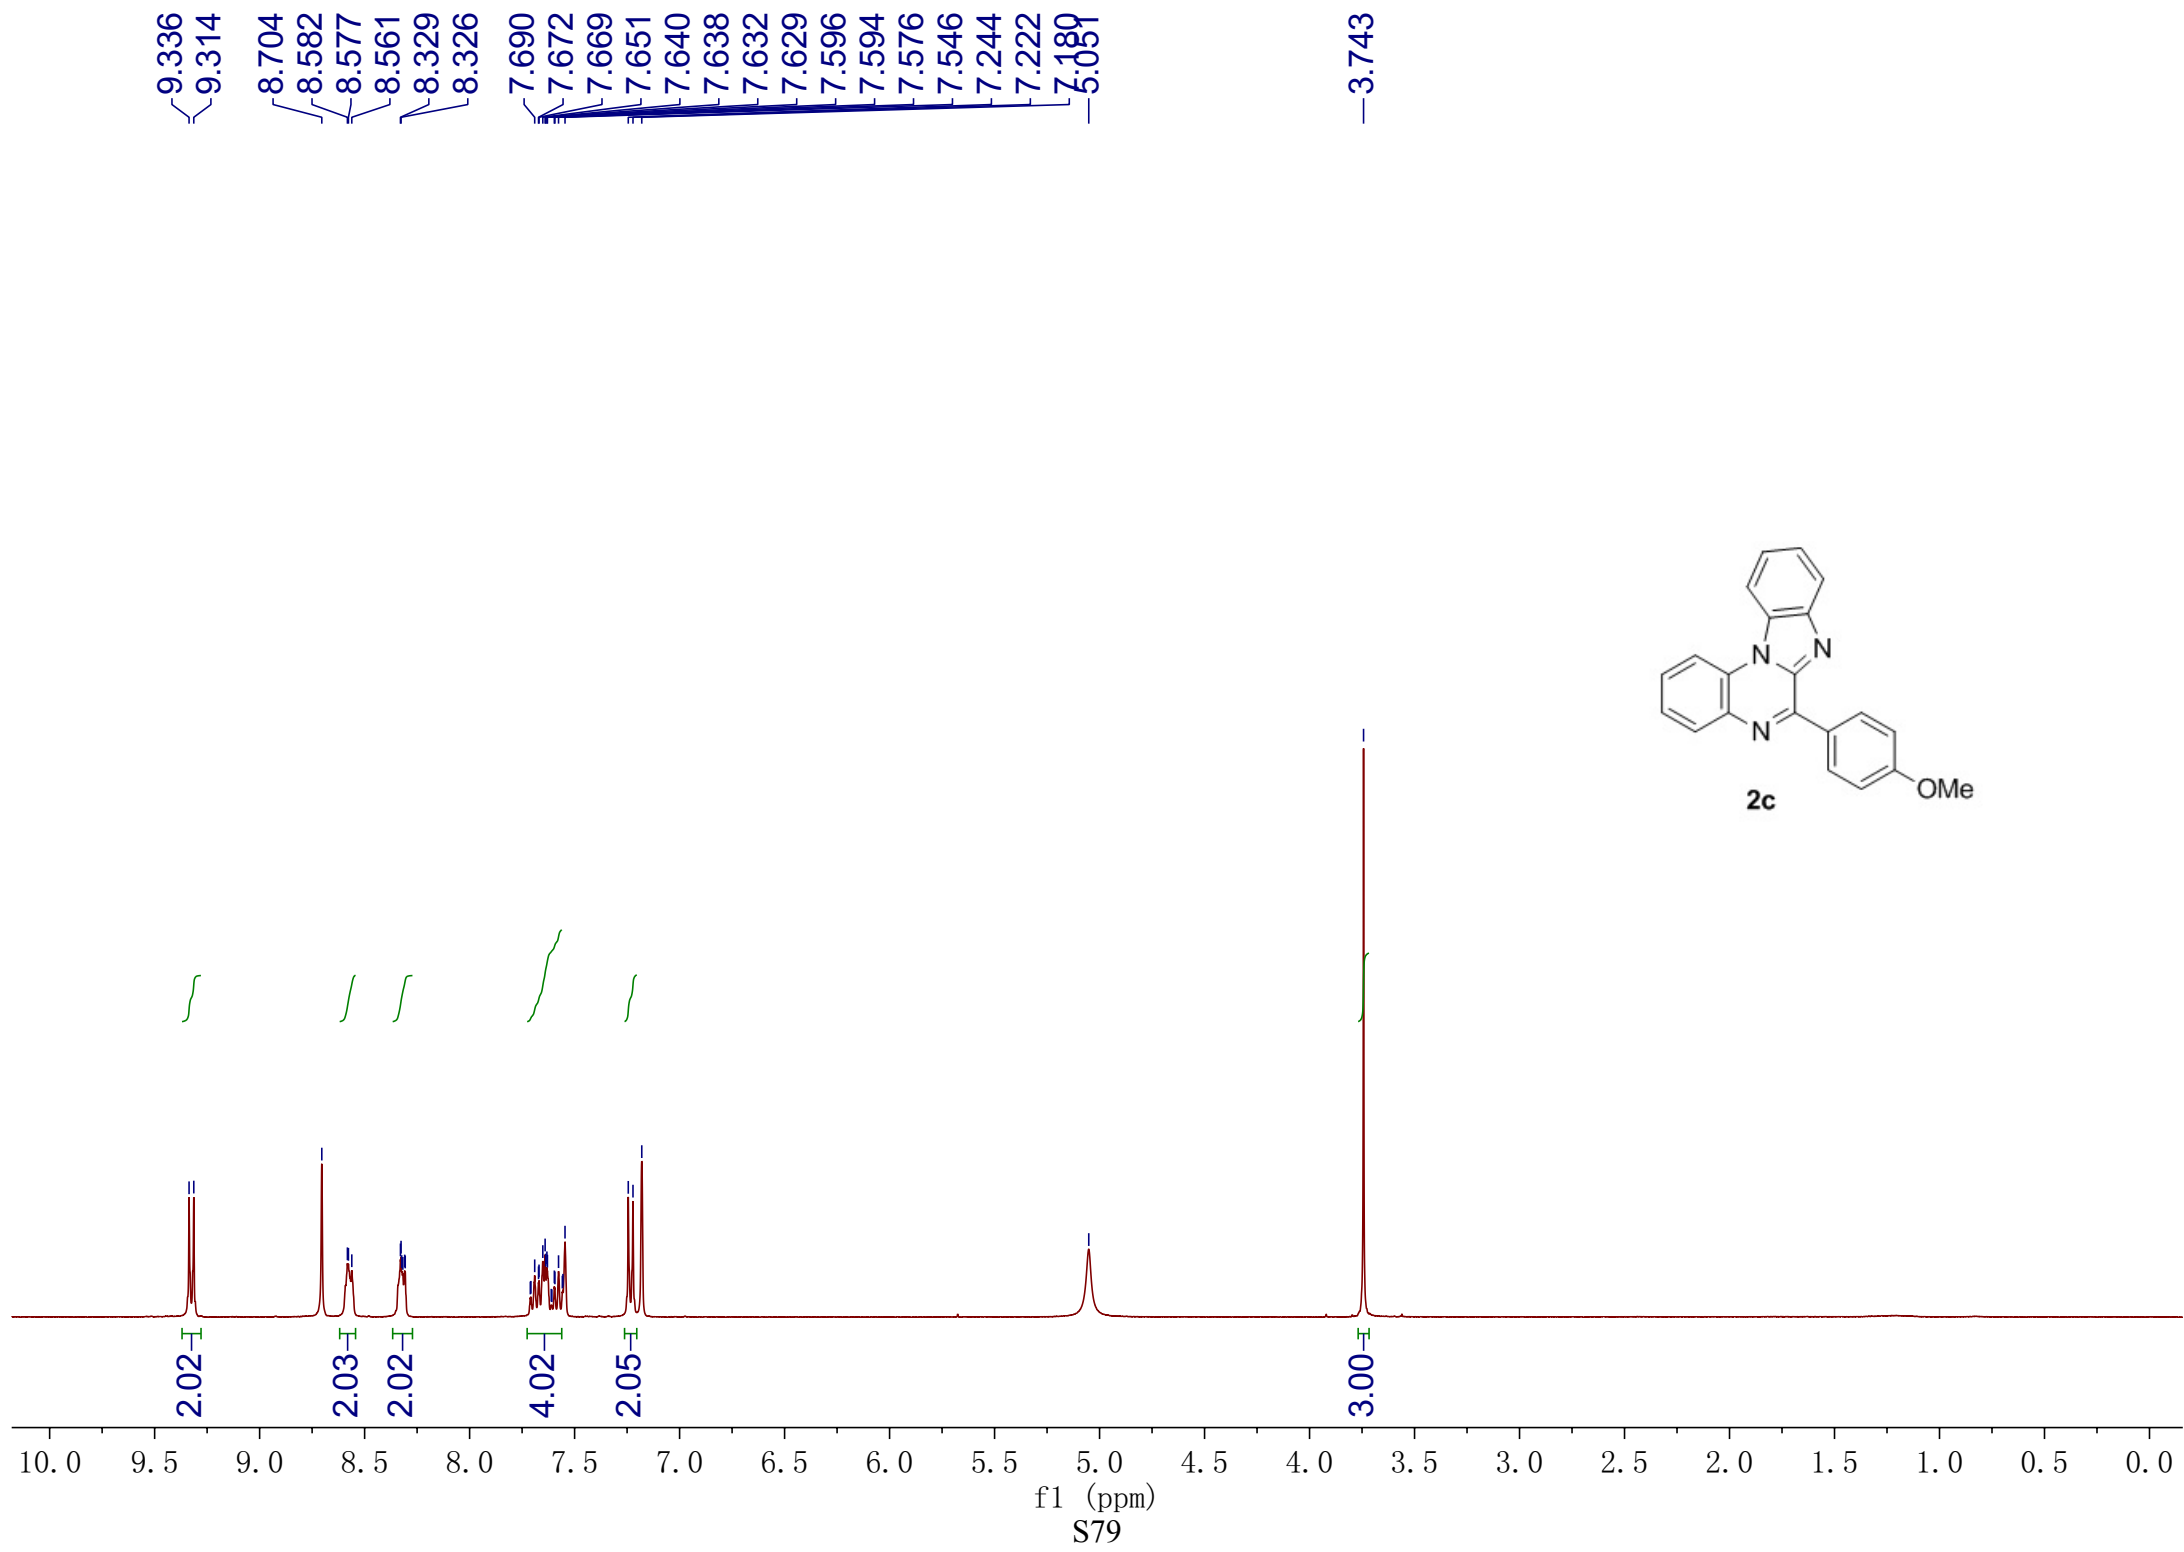

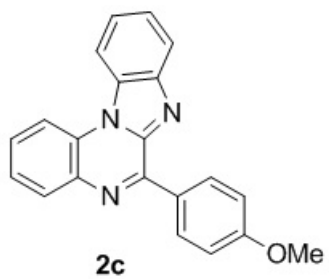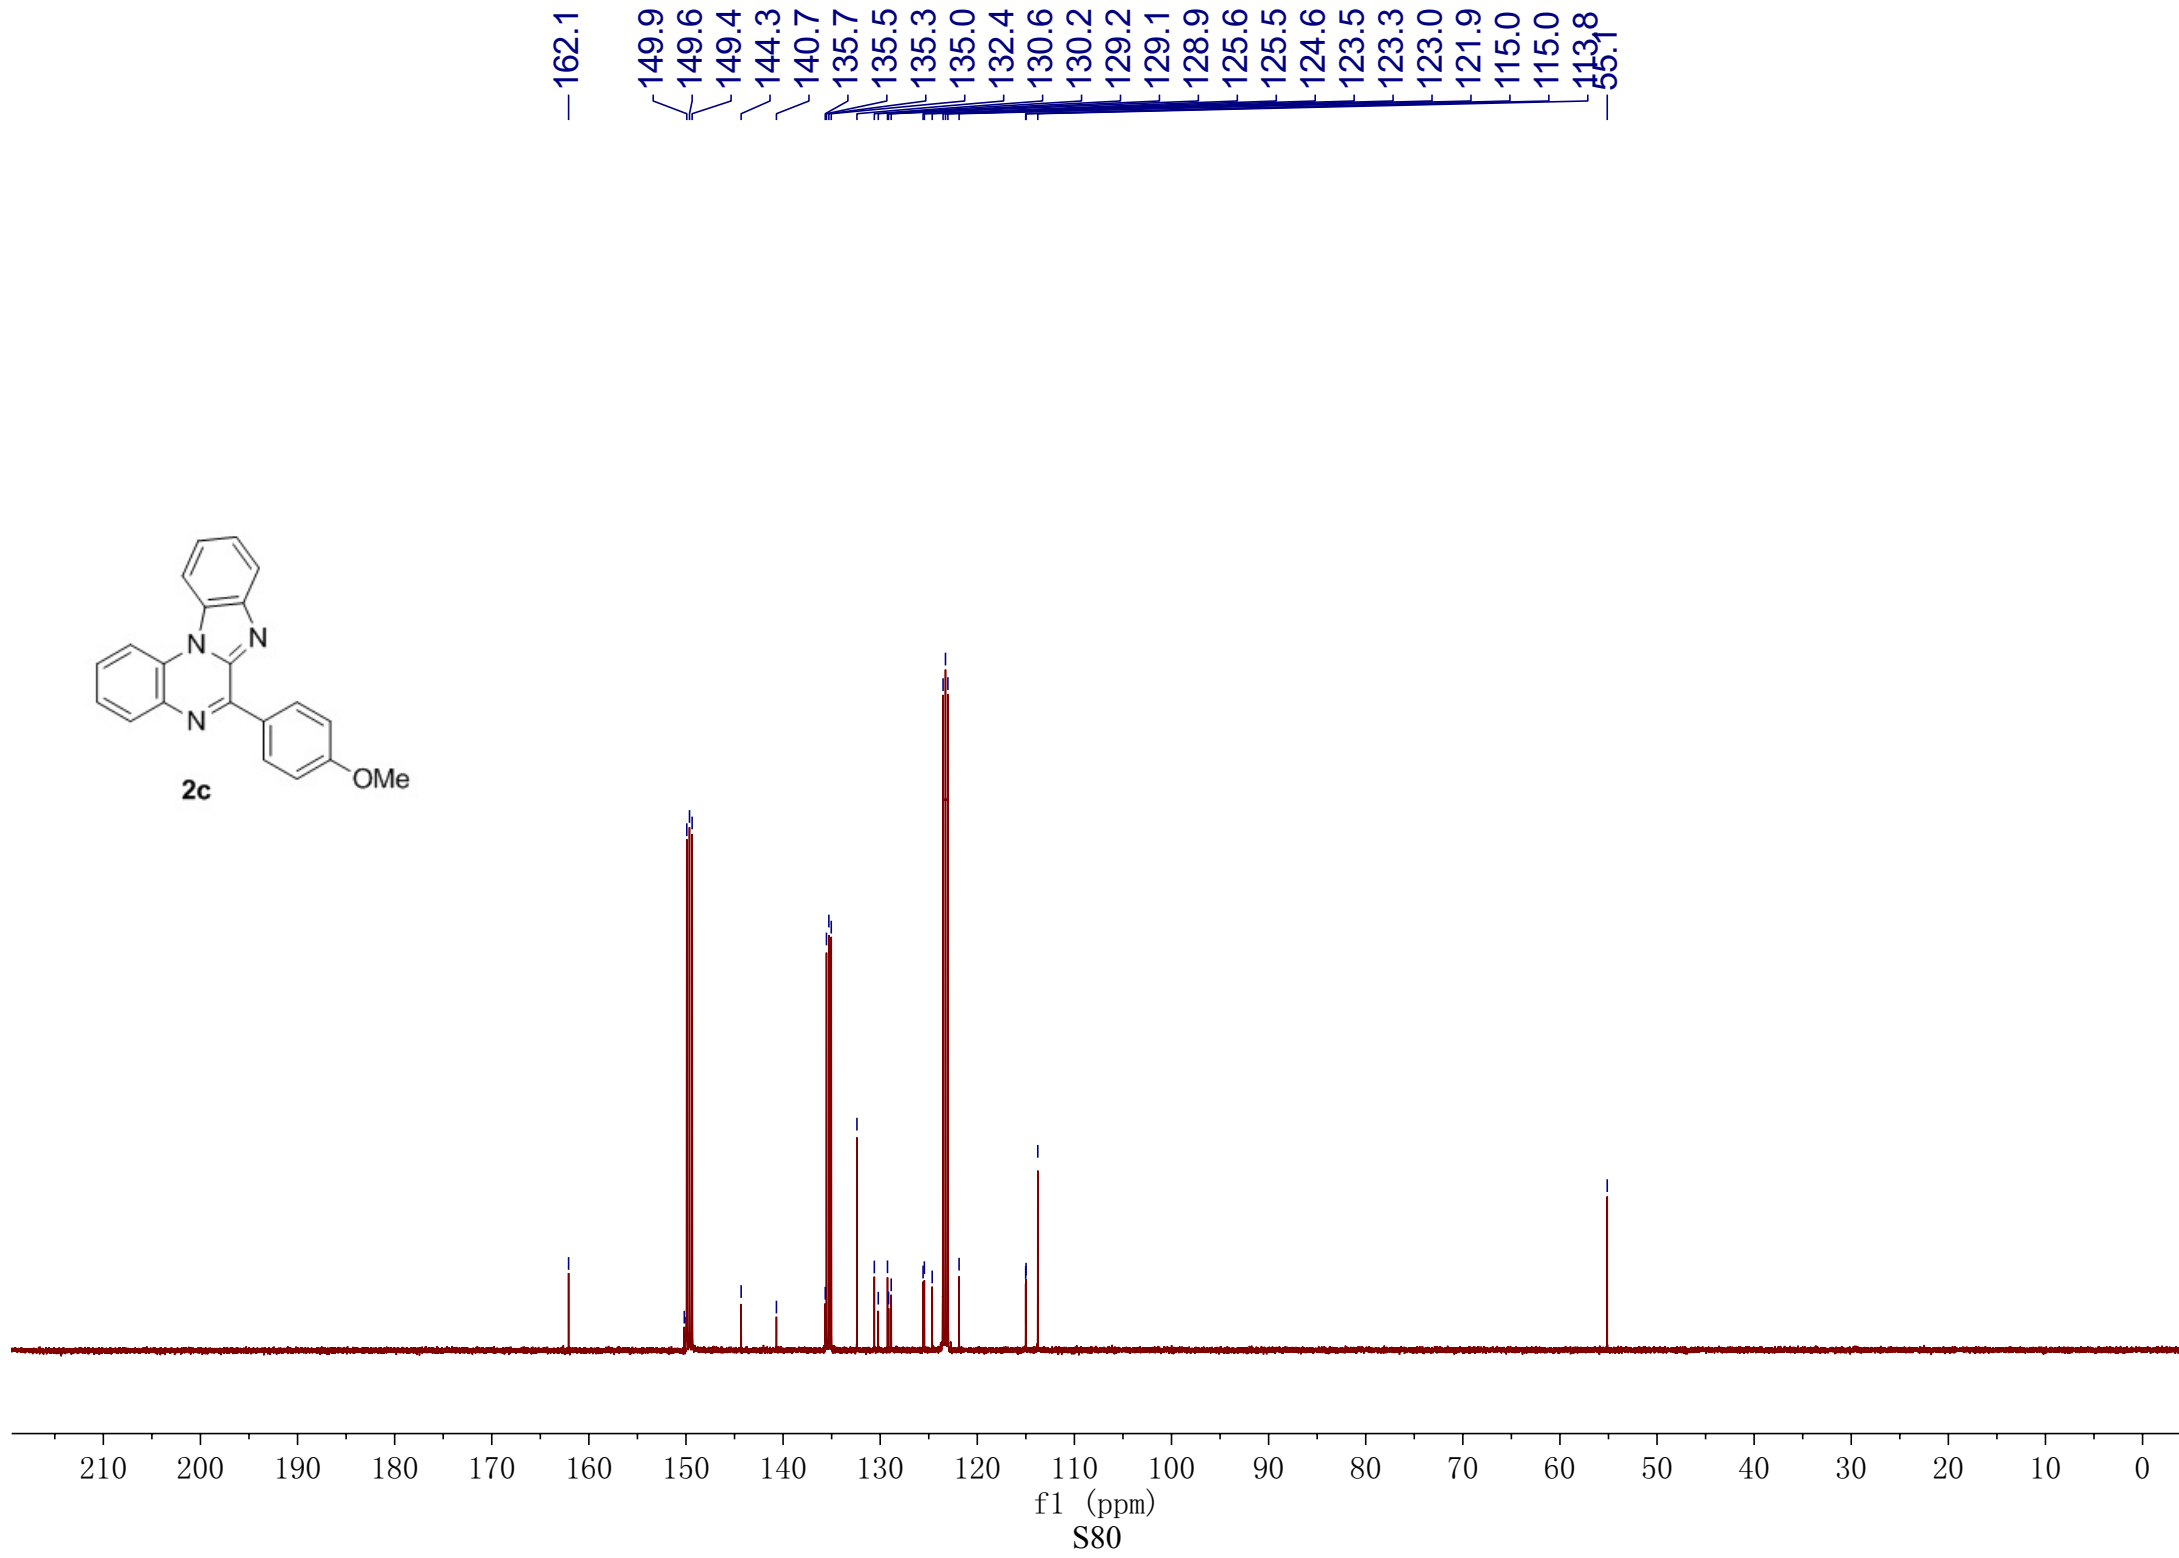

9.280  
9.275  
9.266  
9.258  
9.249  
9.243  
8.740  
8.573  
8.321  
8.318  
8.302  
7.727  
7.724  
7.672  
7.668  
7.664  
7.656  
7.649  
7.644  
7.640  
7.595  
7.578  
7.431  
7.409  
7.387  
7.214  
5.060

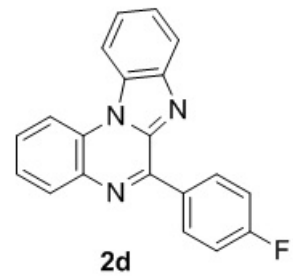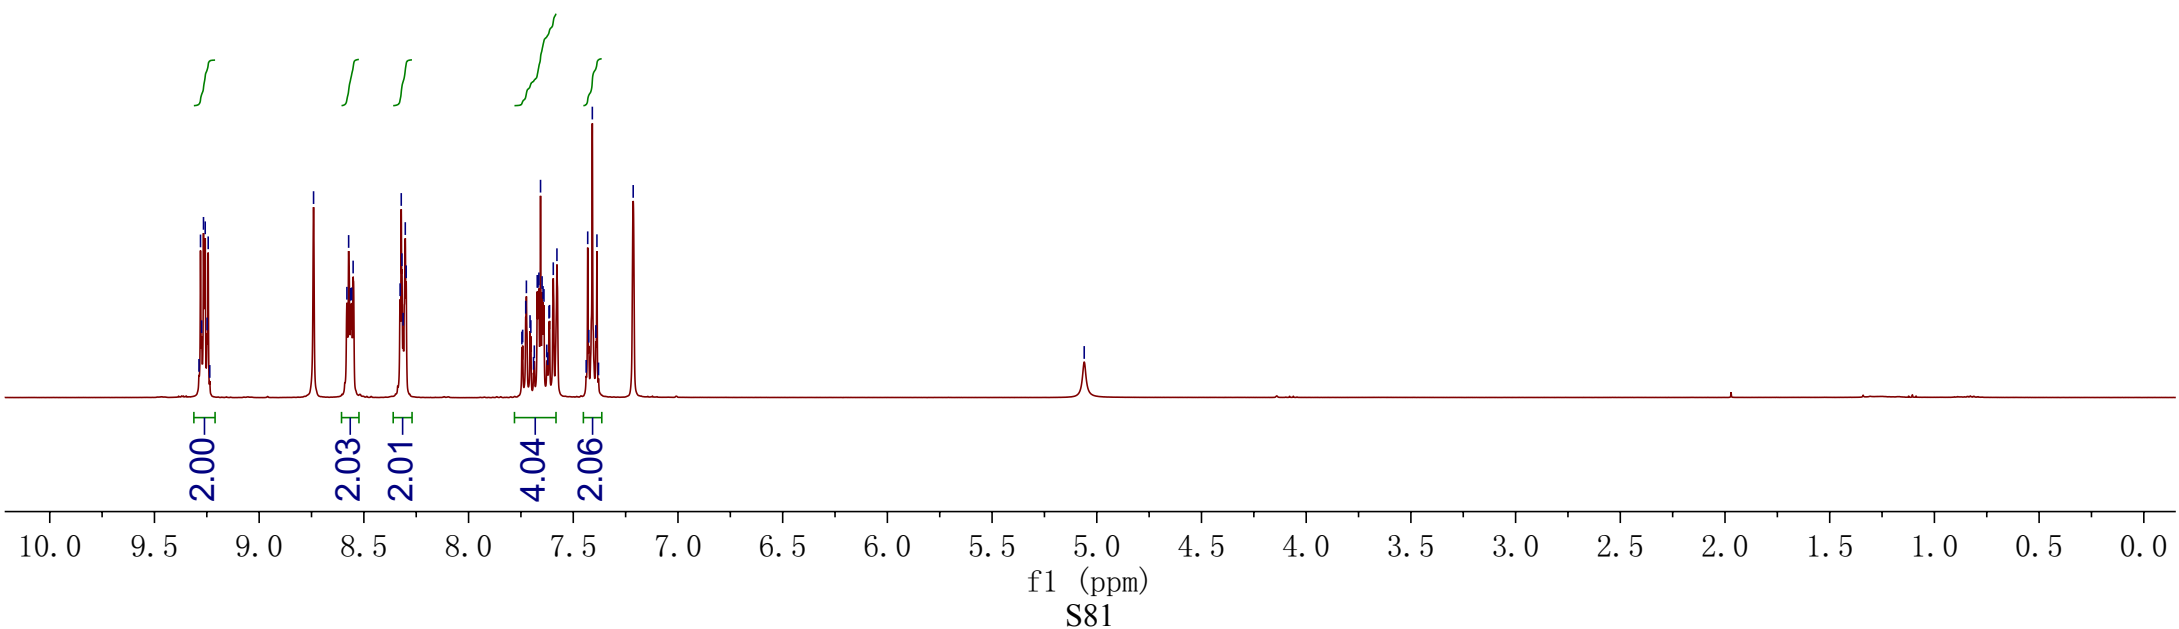

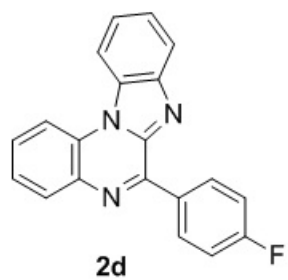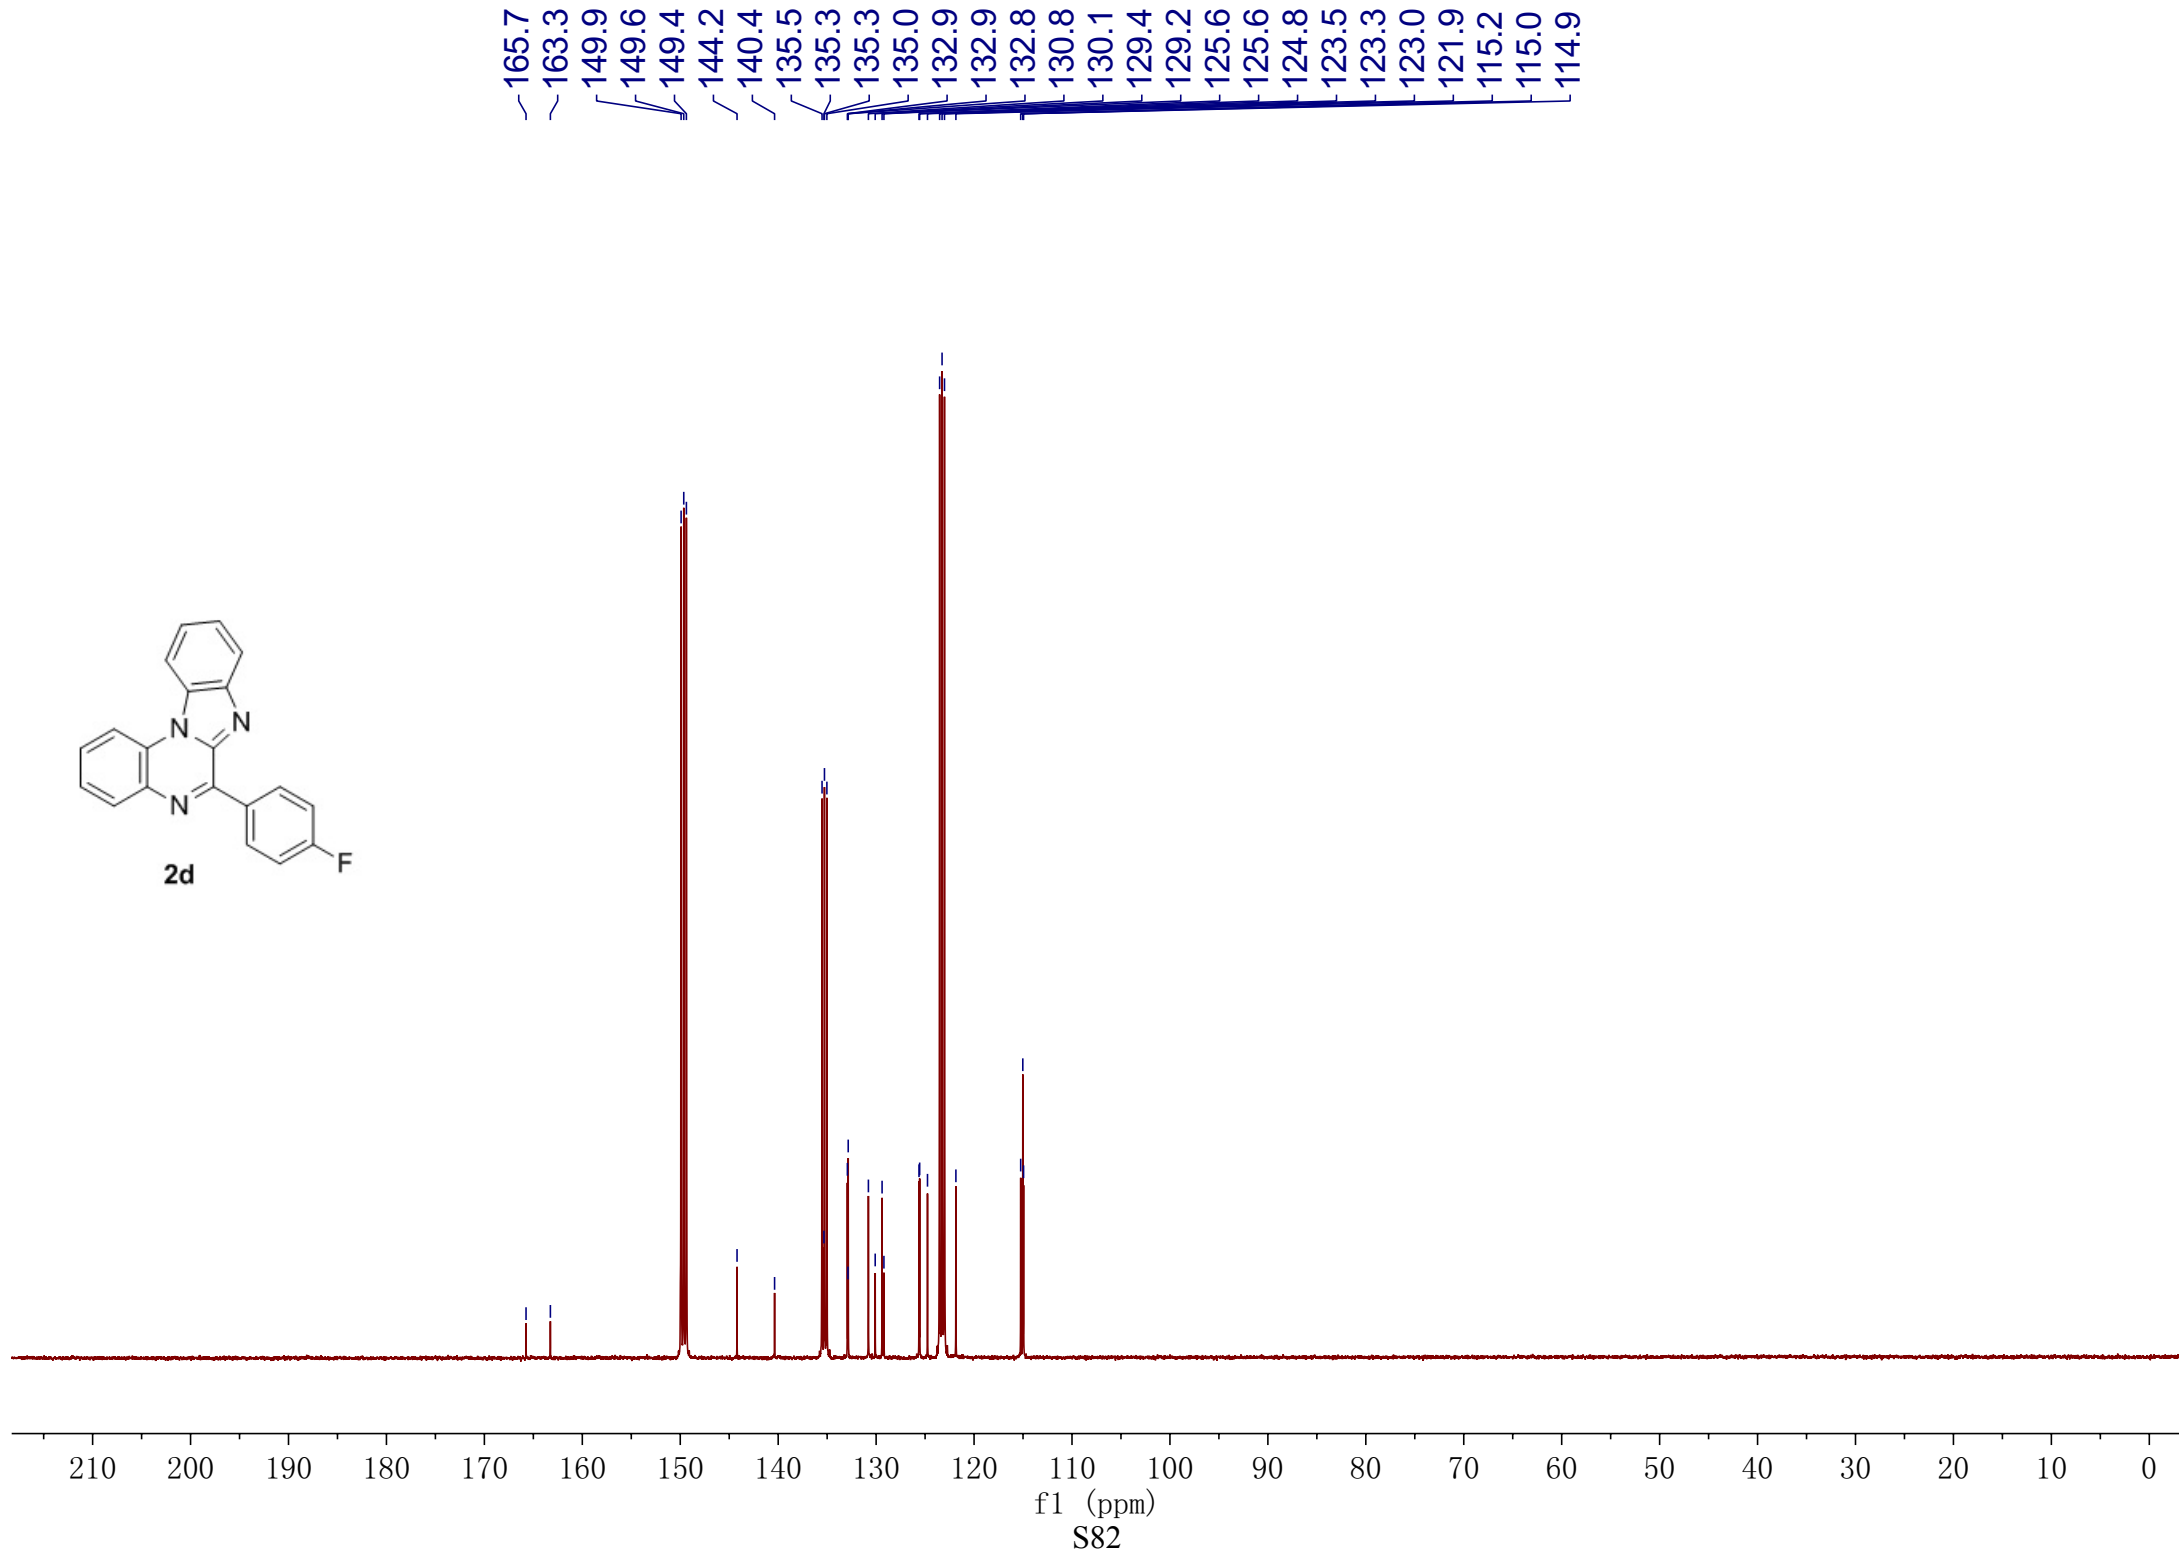

9.210  
9.189  
8.740  
8.612  
8.593  
8.338  
8.318  
7.780  
7.761  
7.741  
7.690  
7.670  
7.641  
7.621  
7.602  
7.582  
7.216

5.076

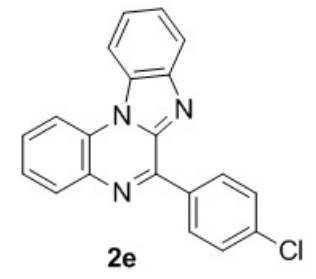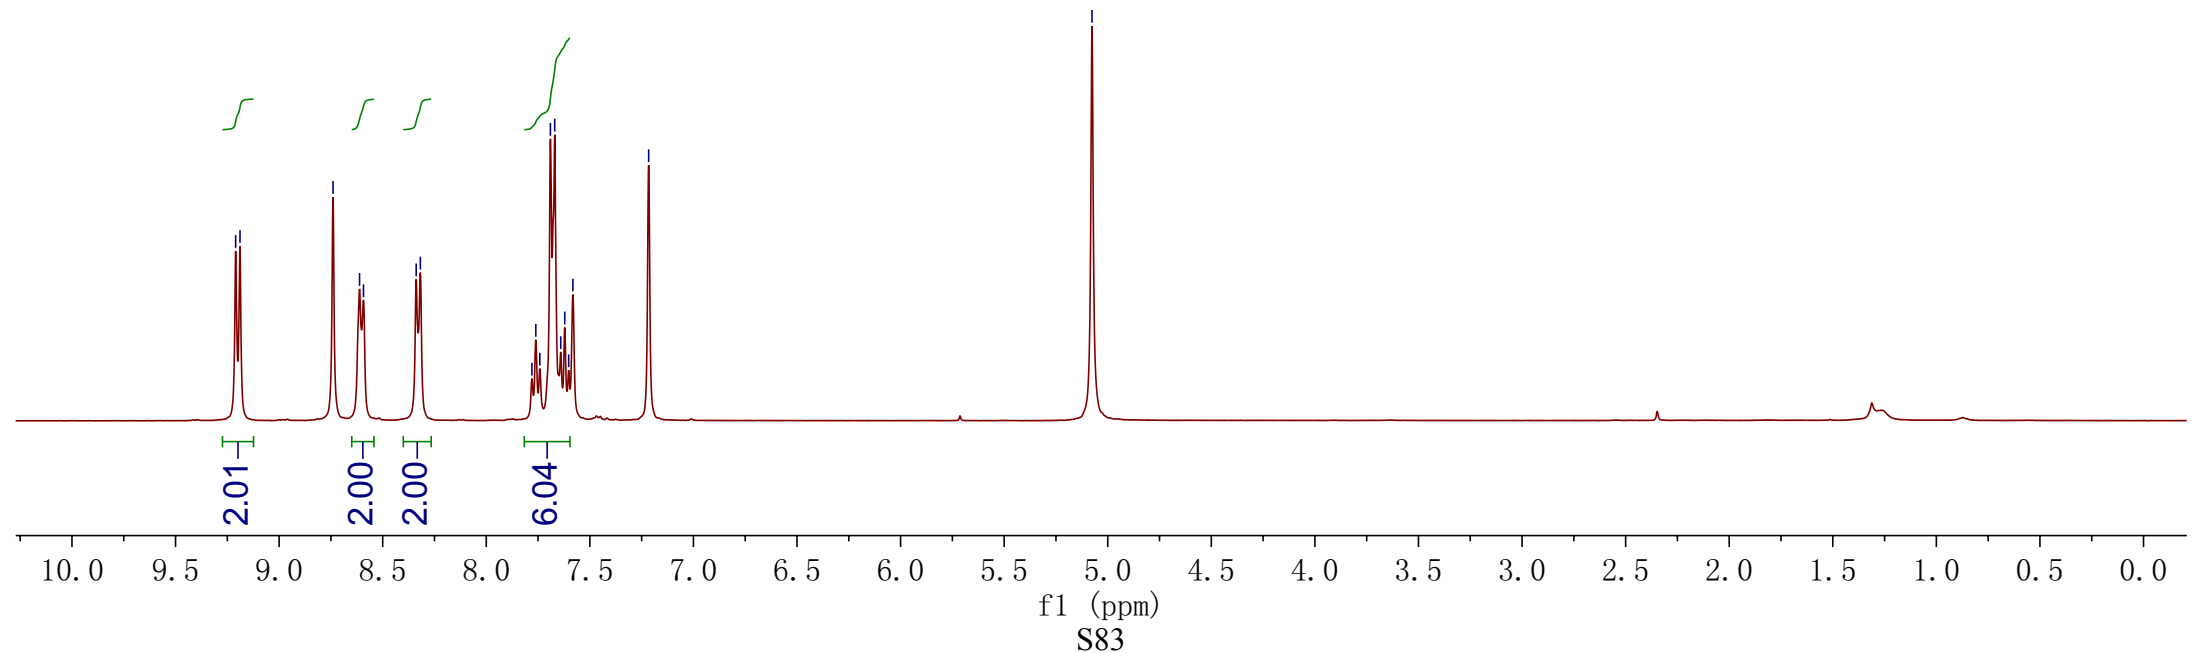

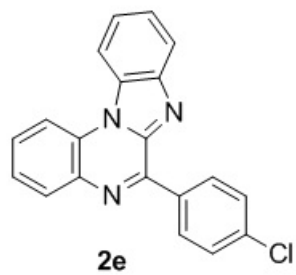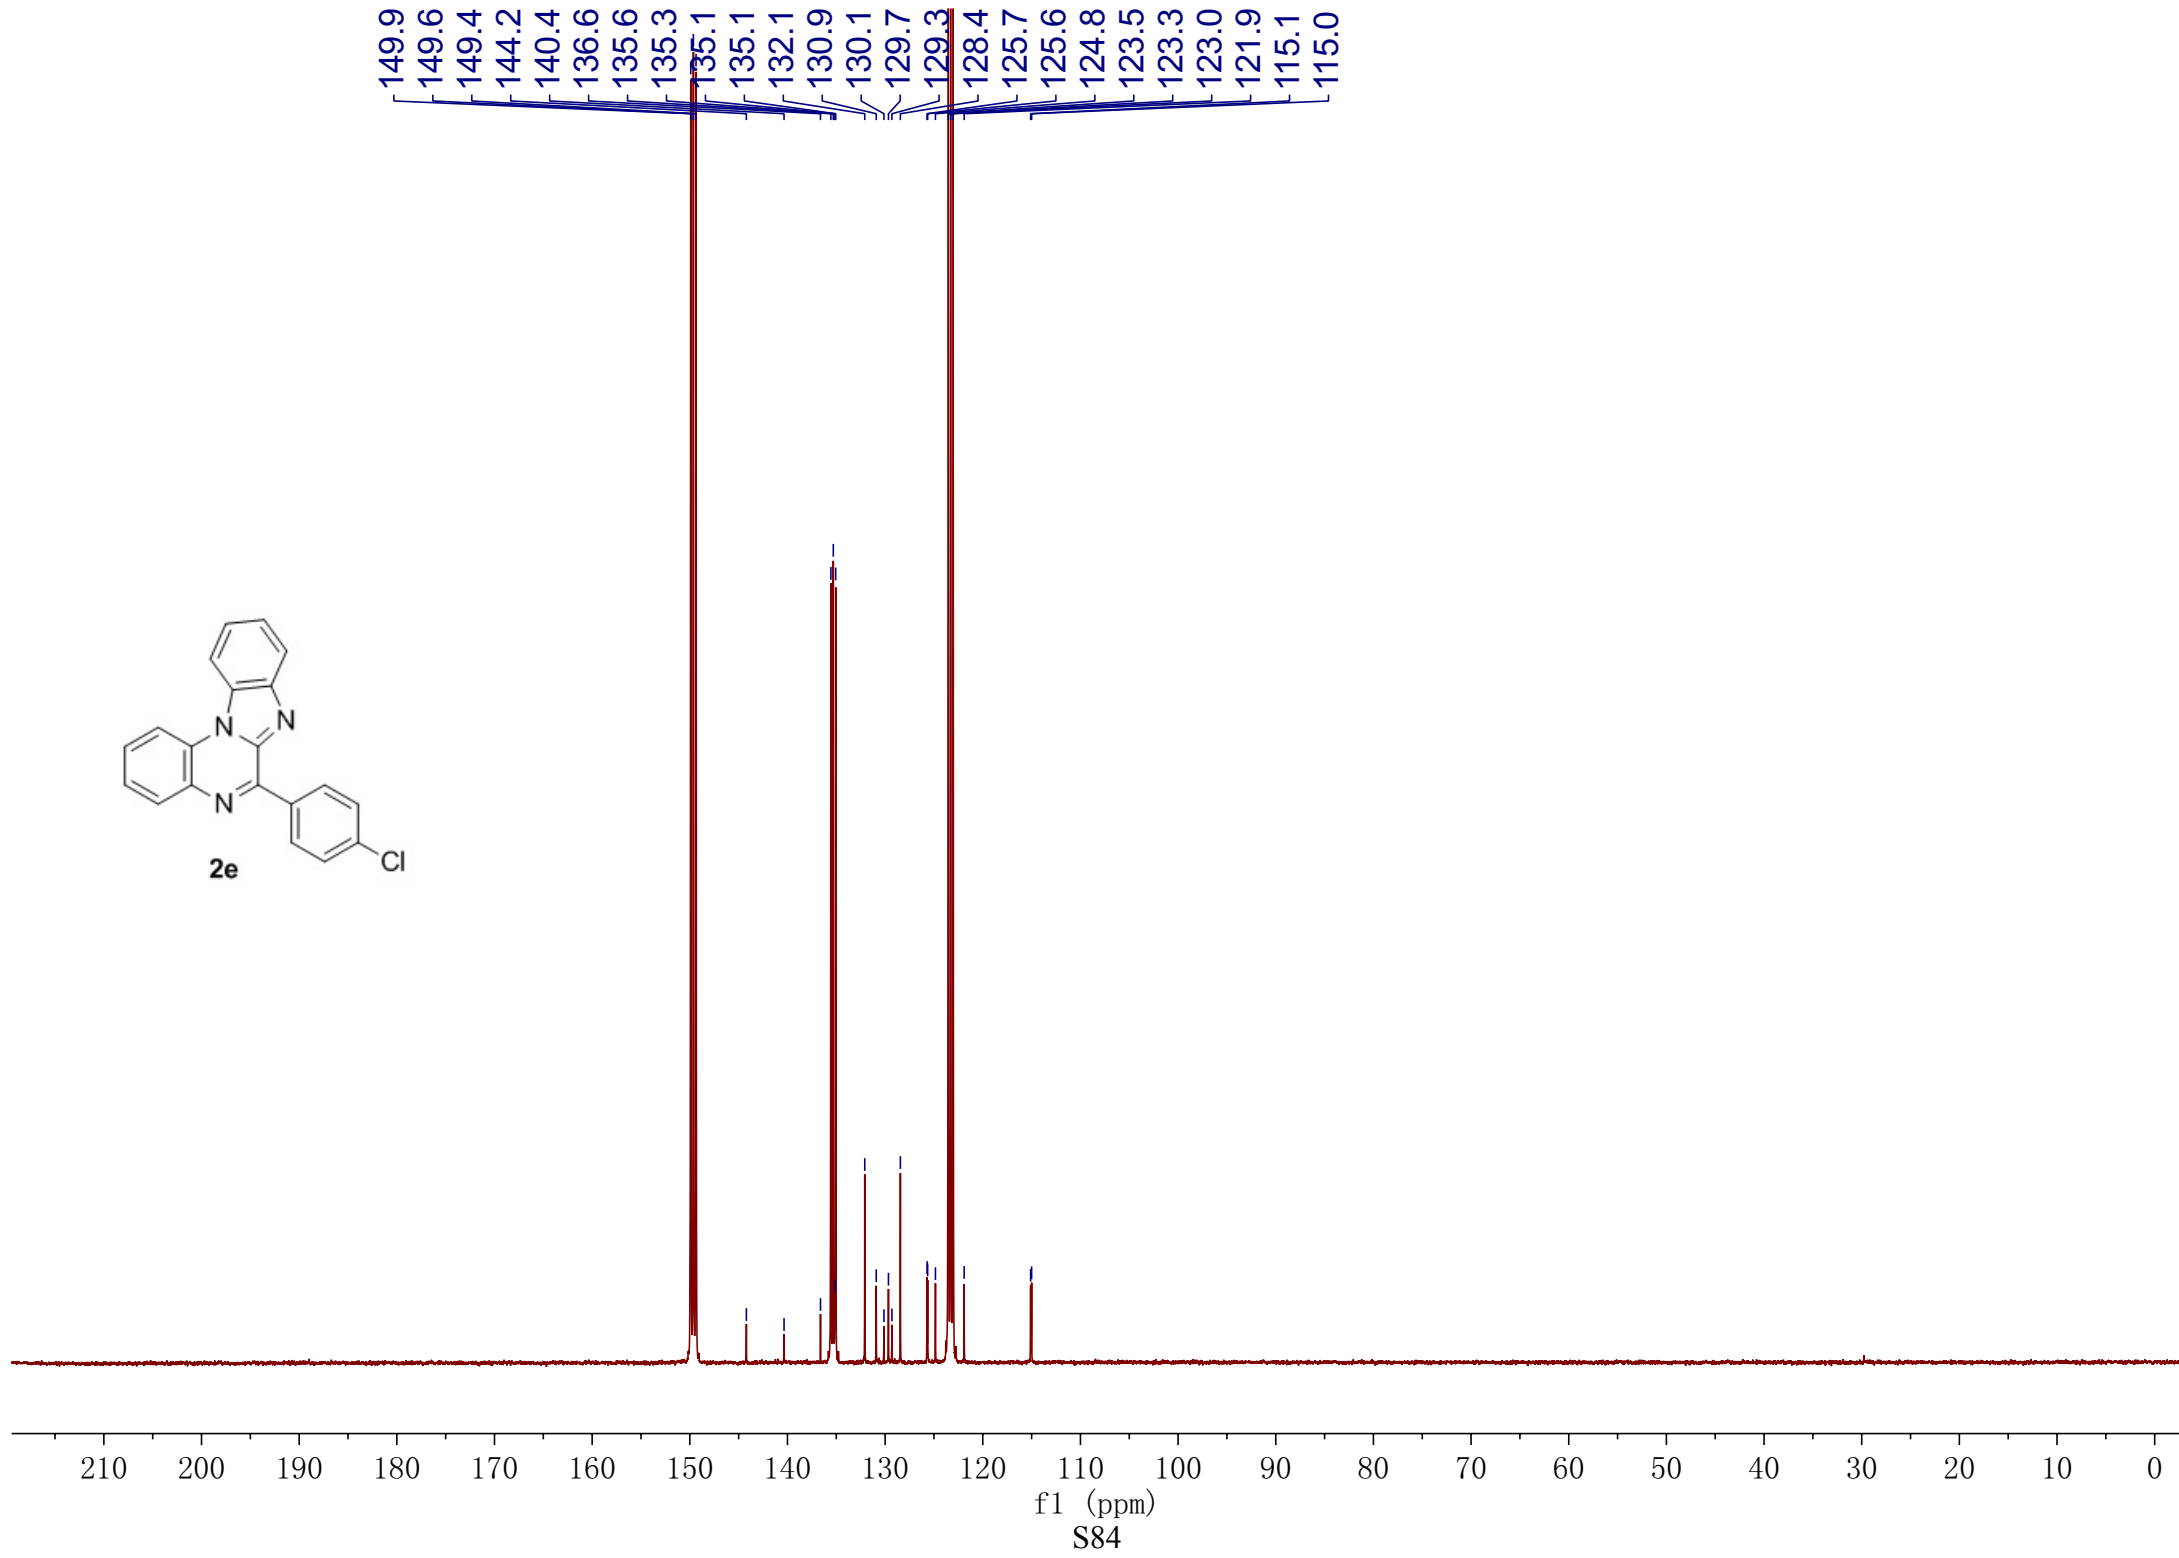



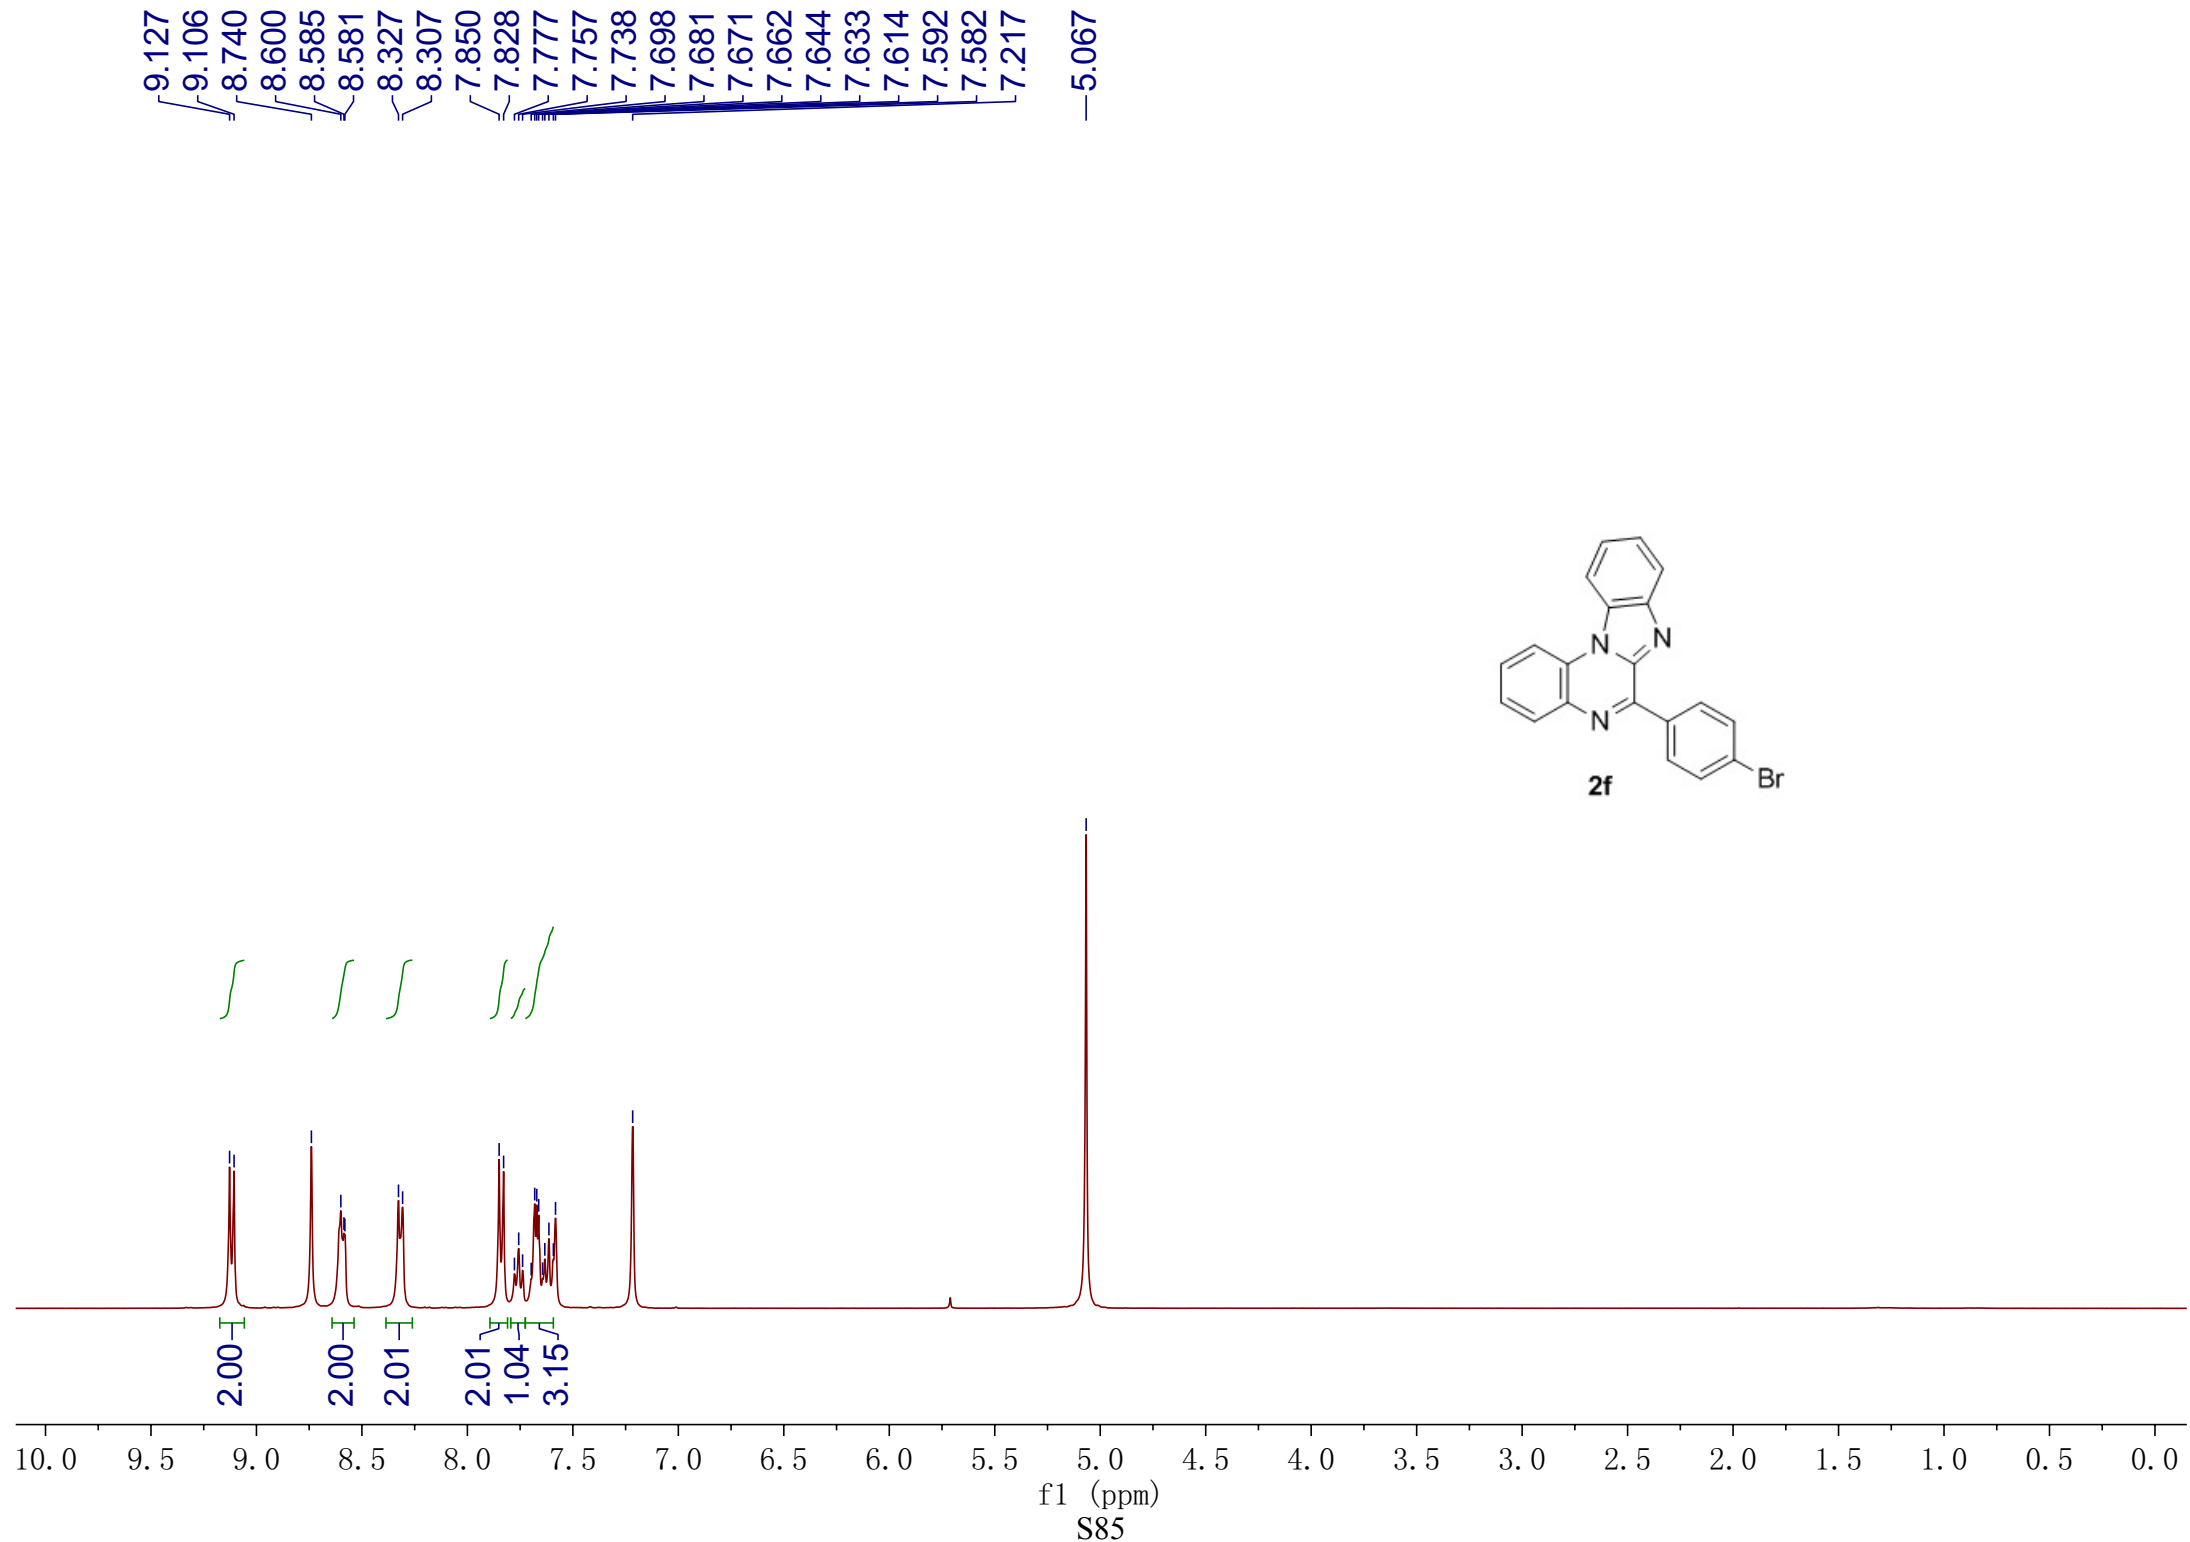

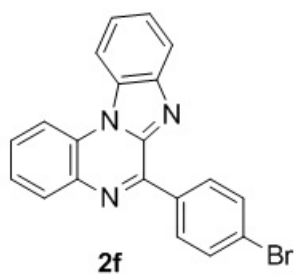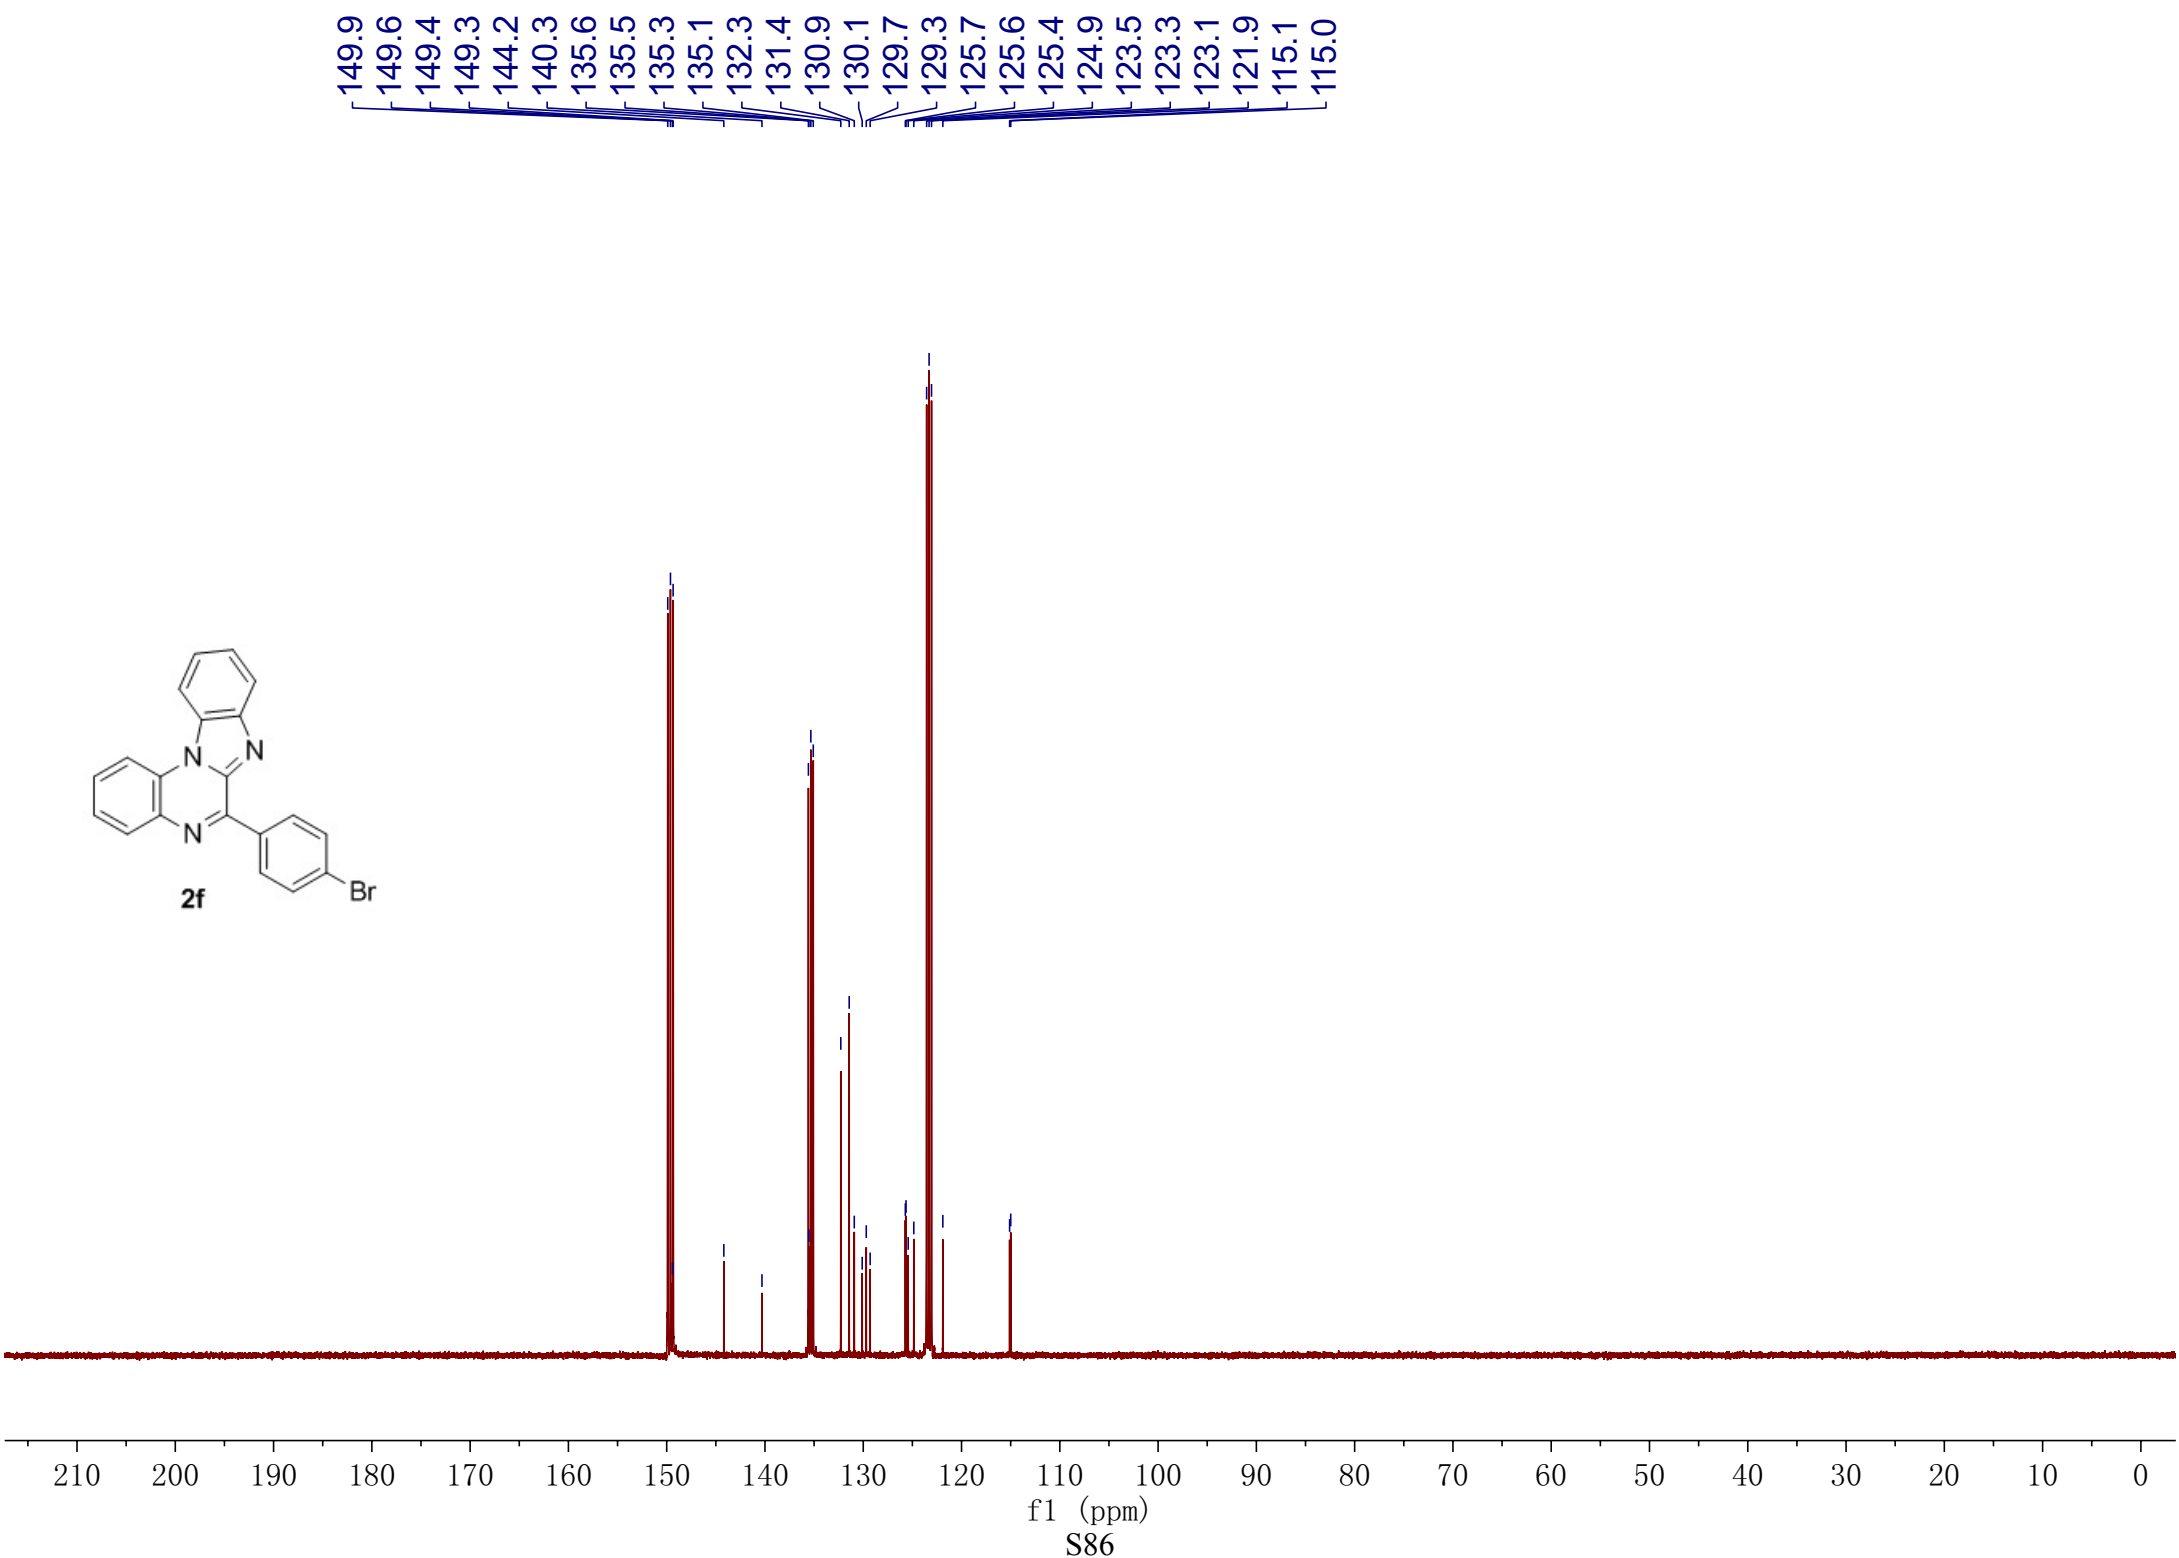

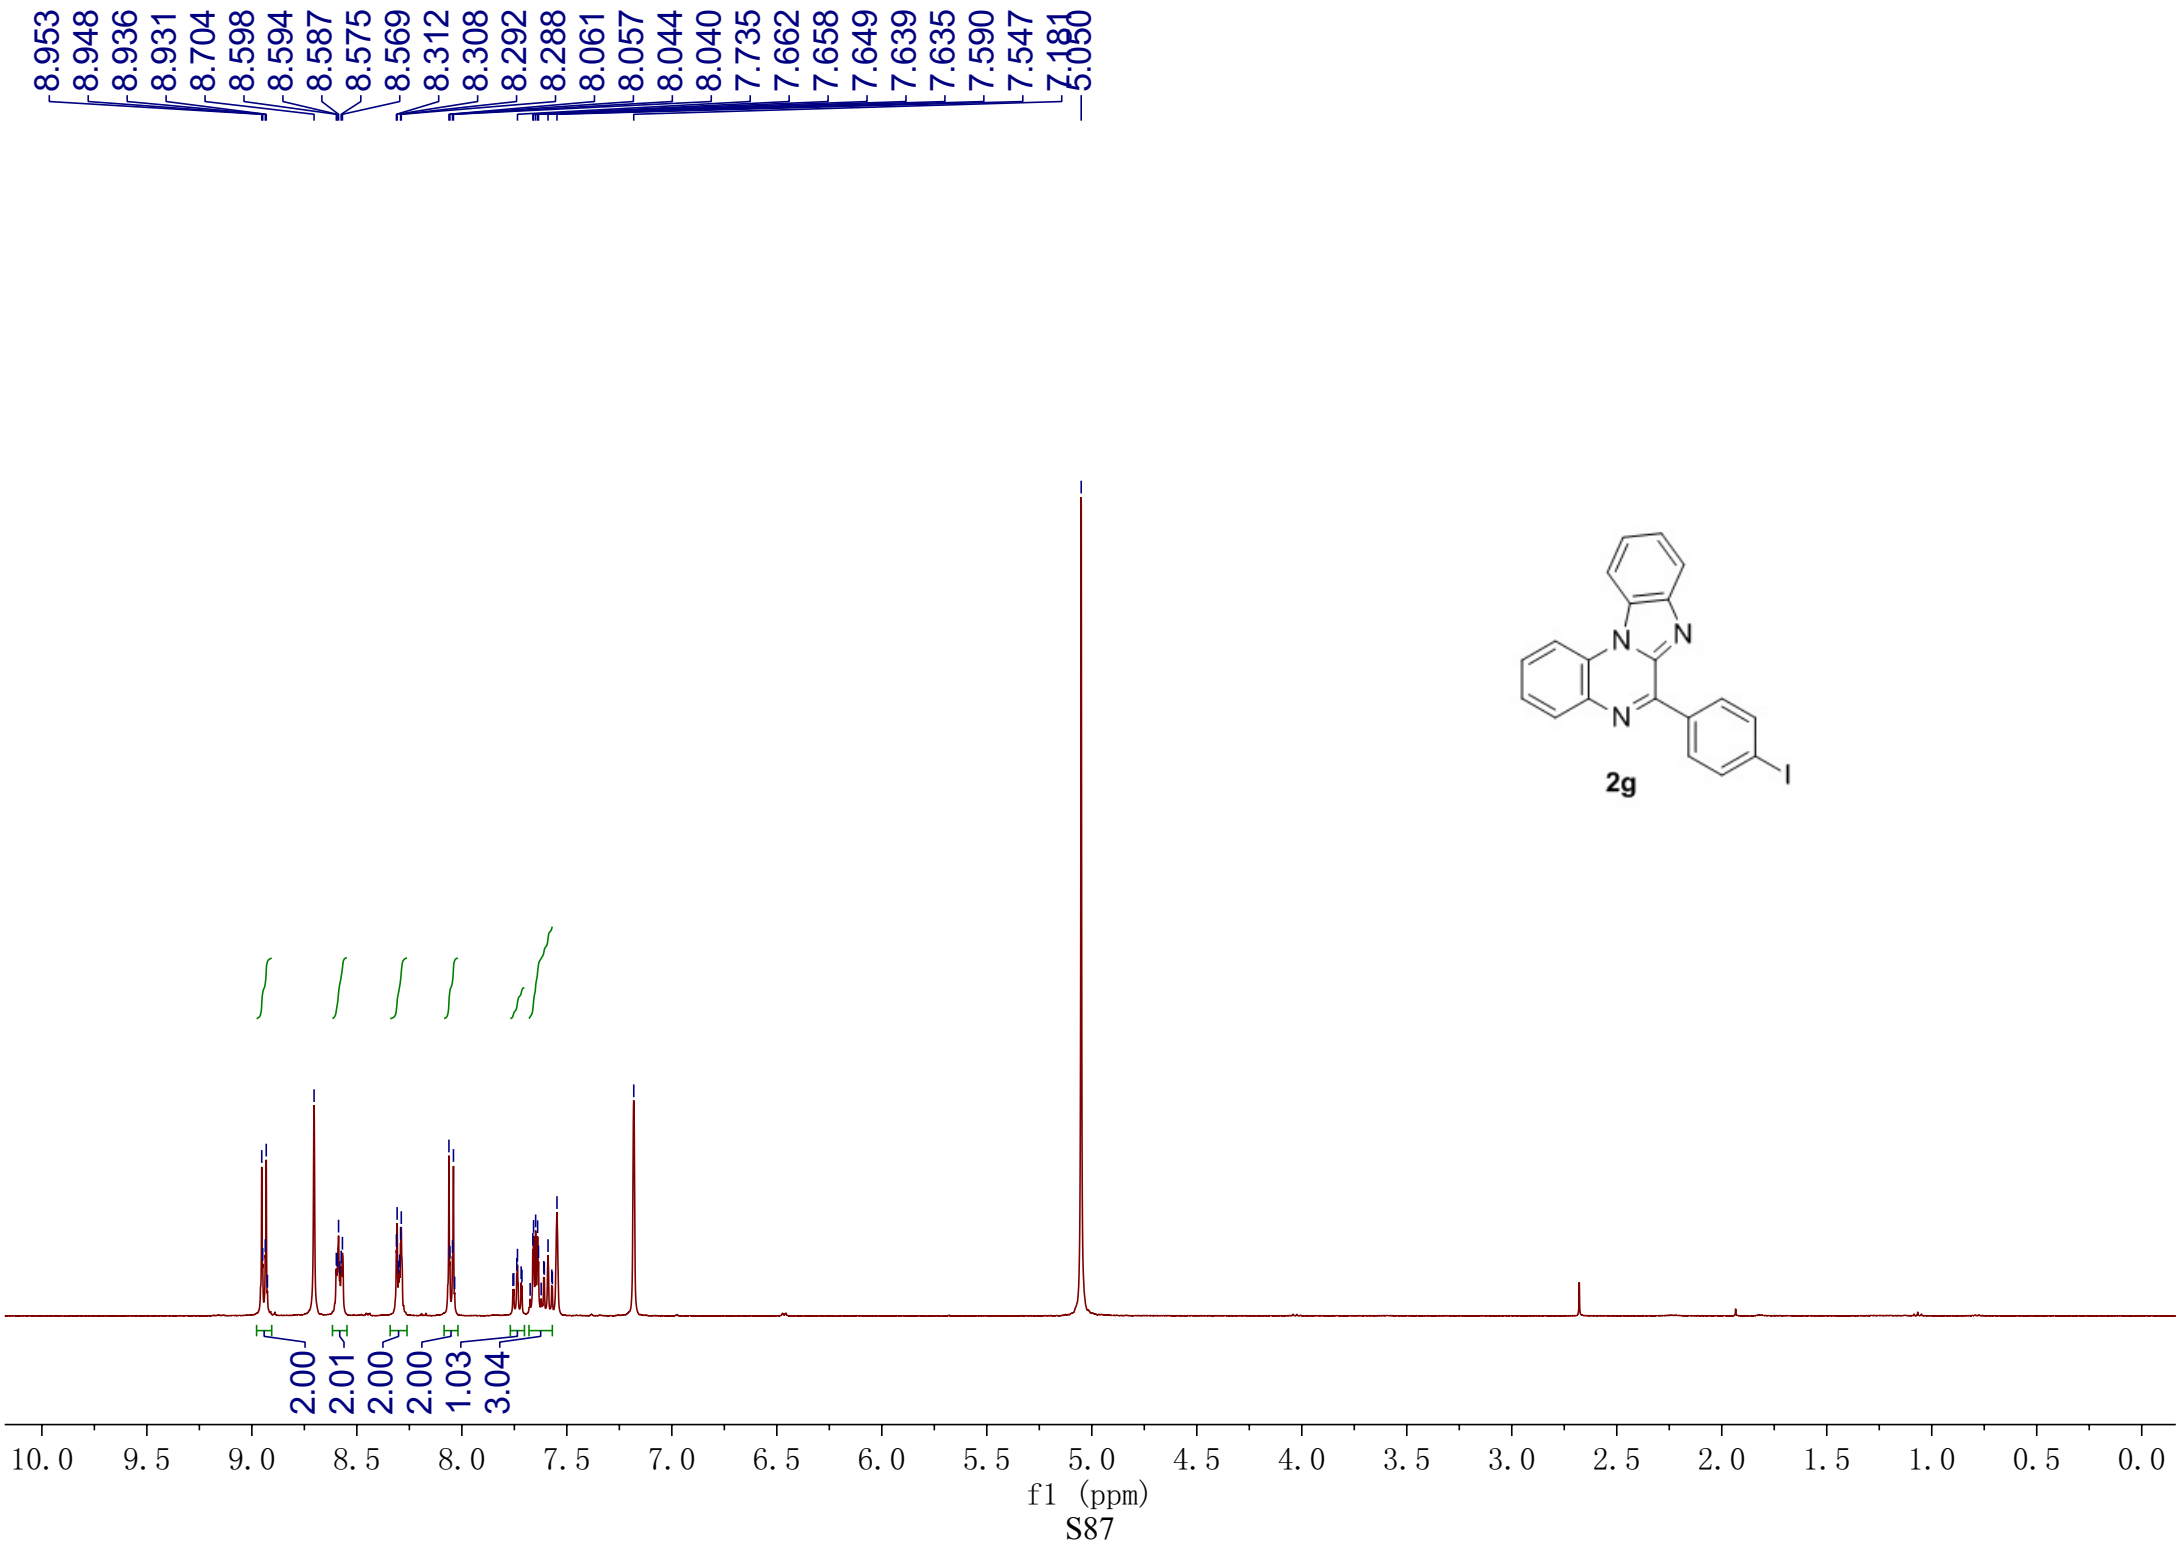

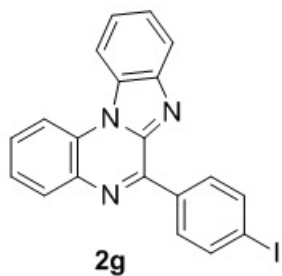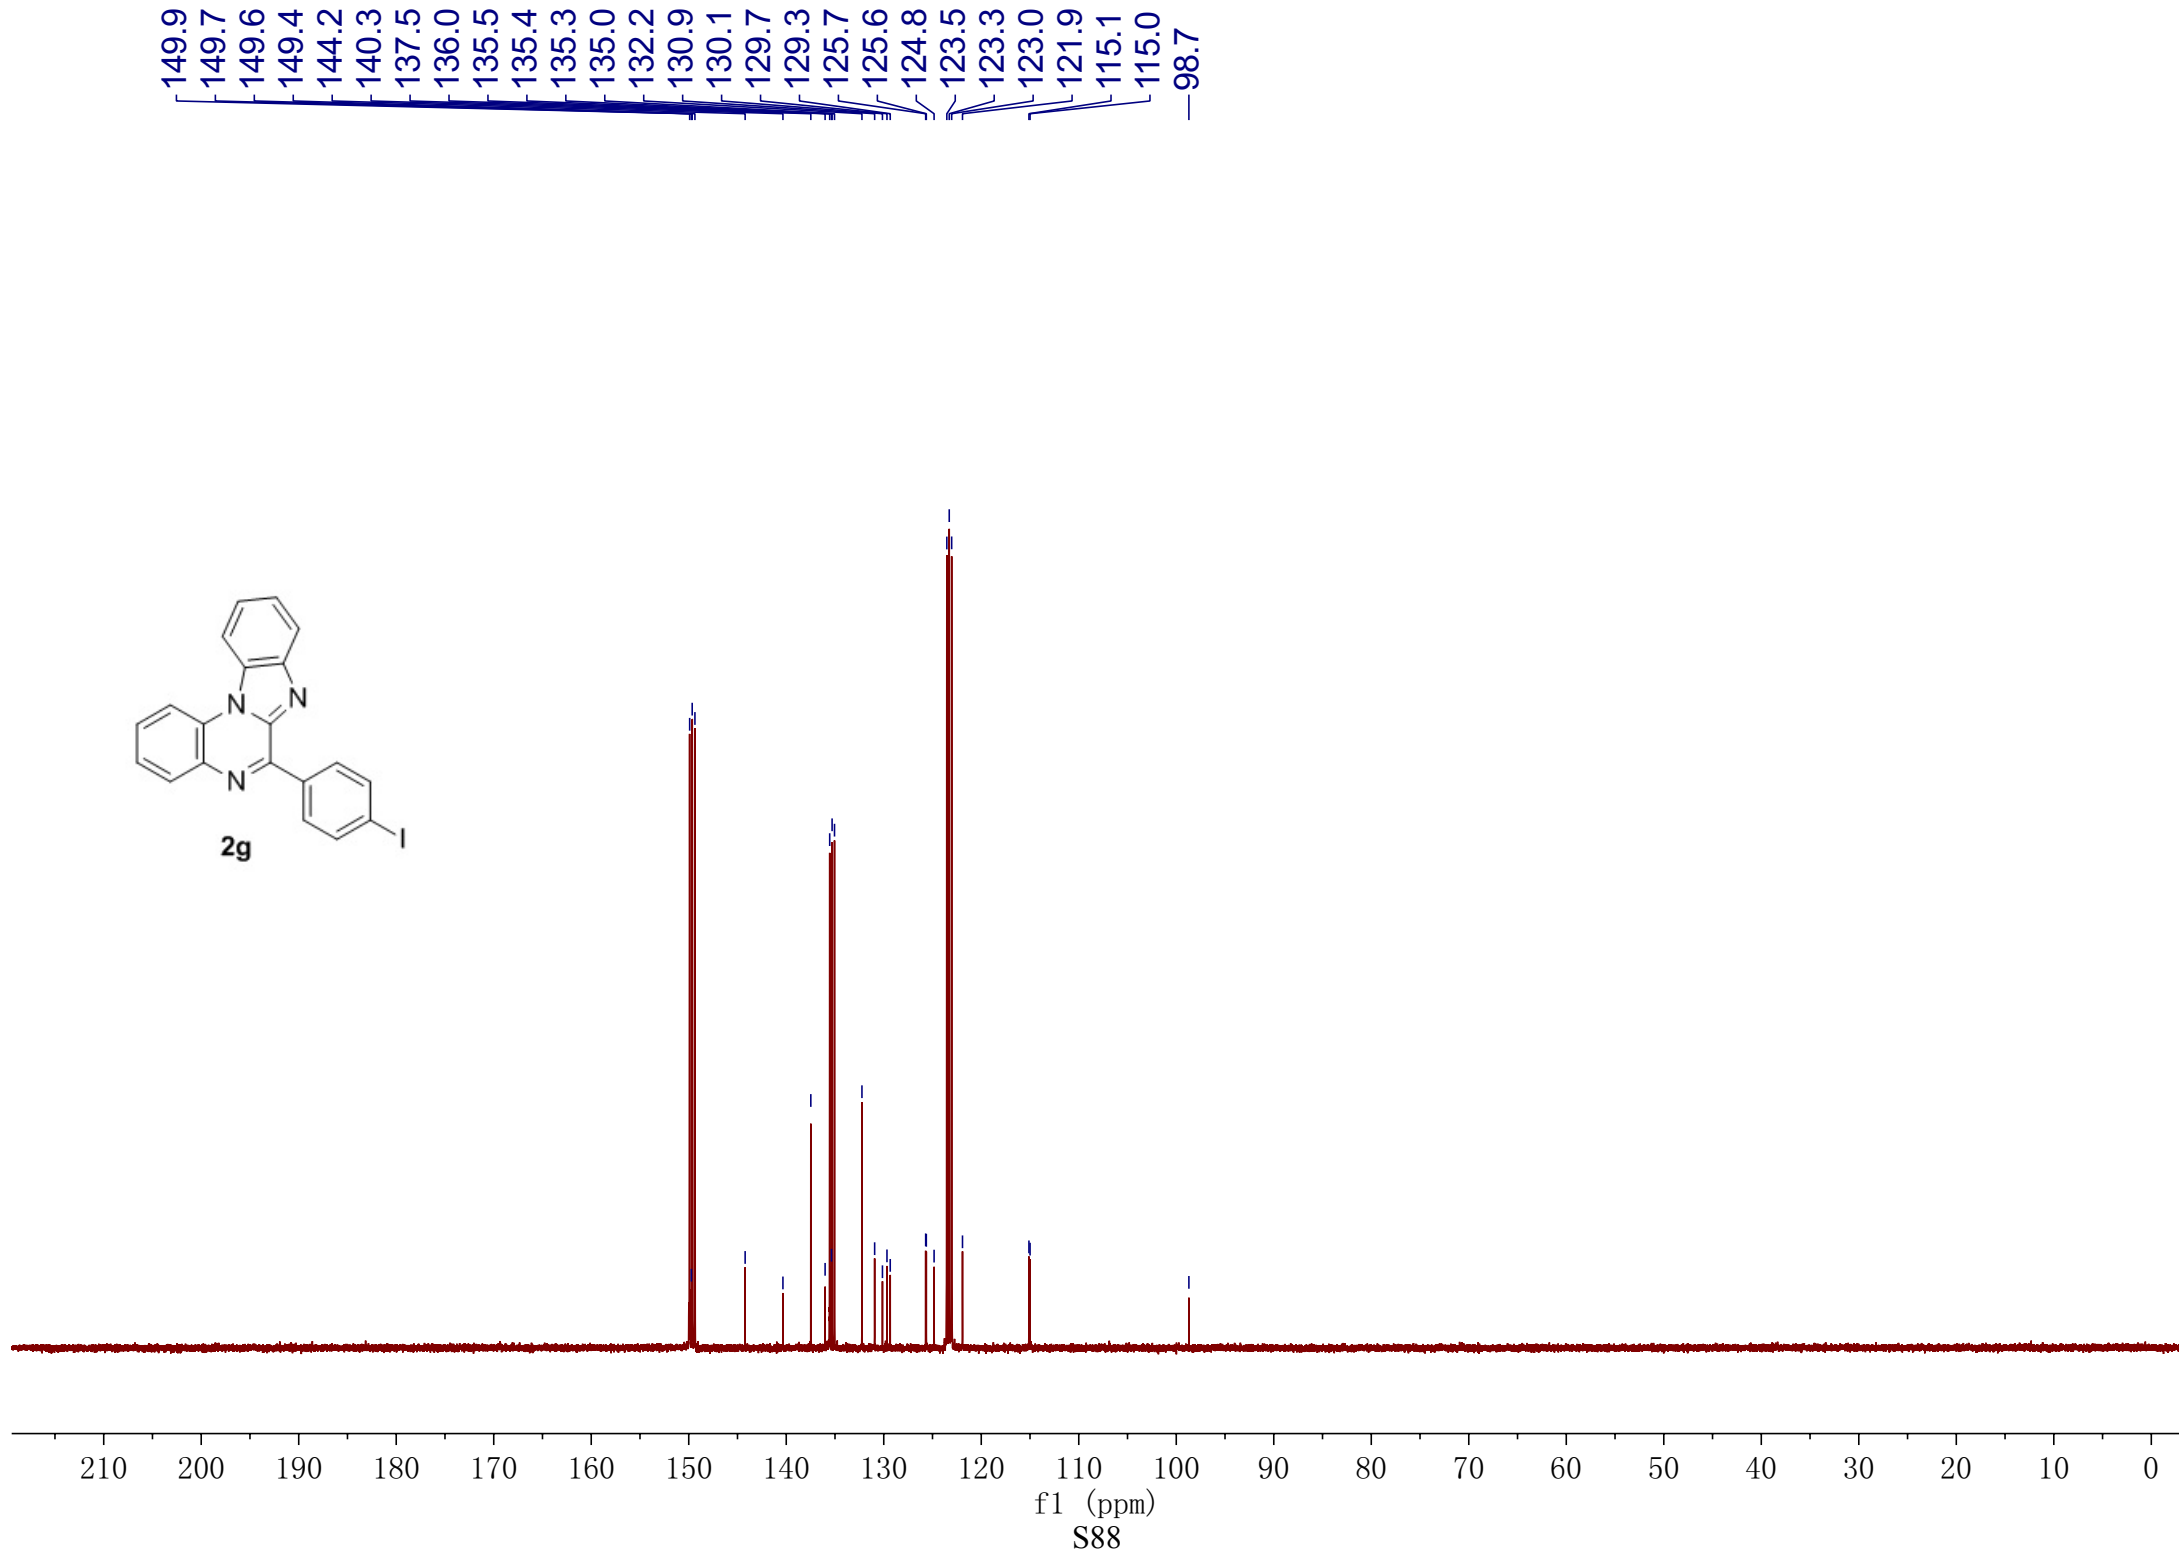

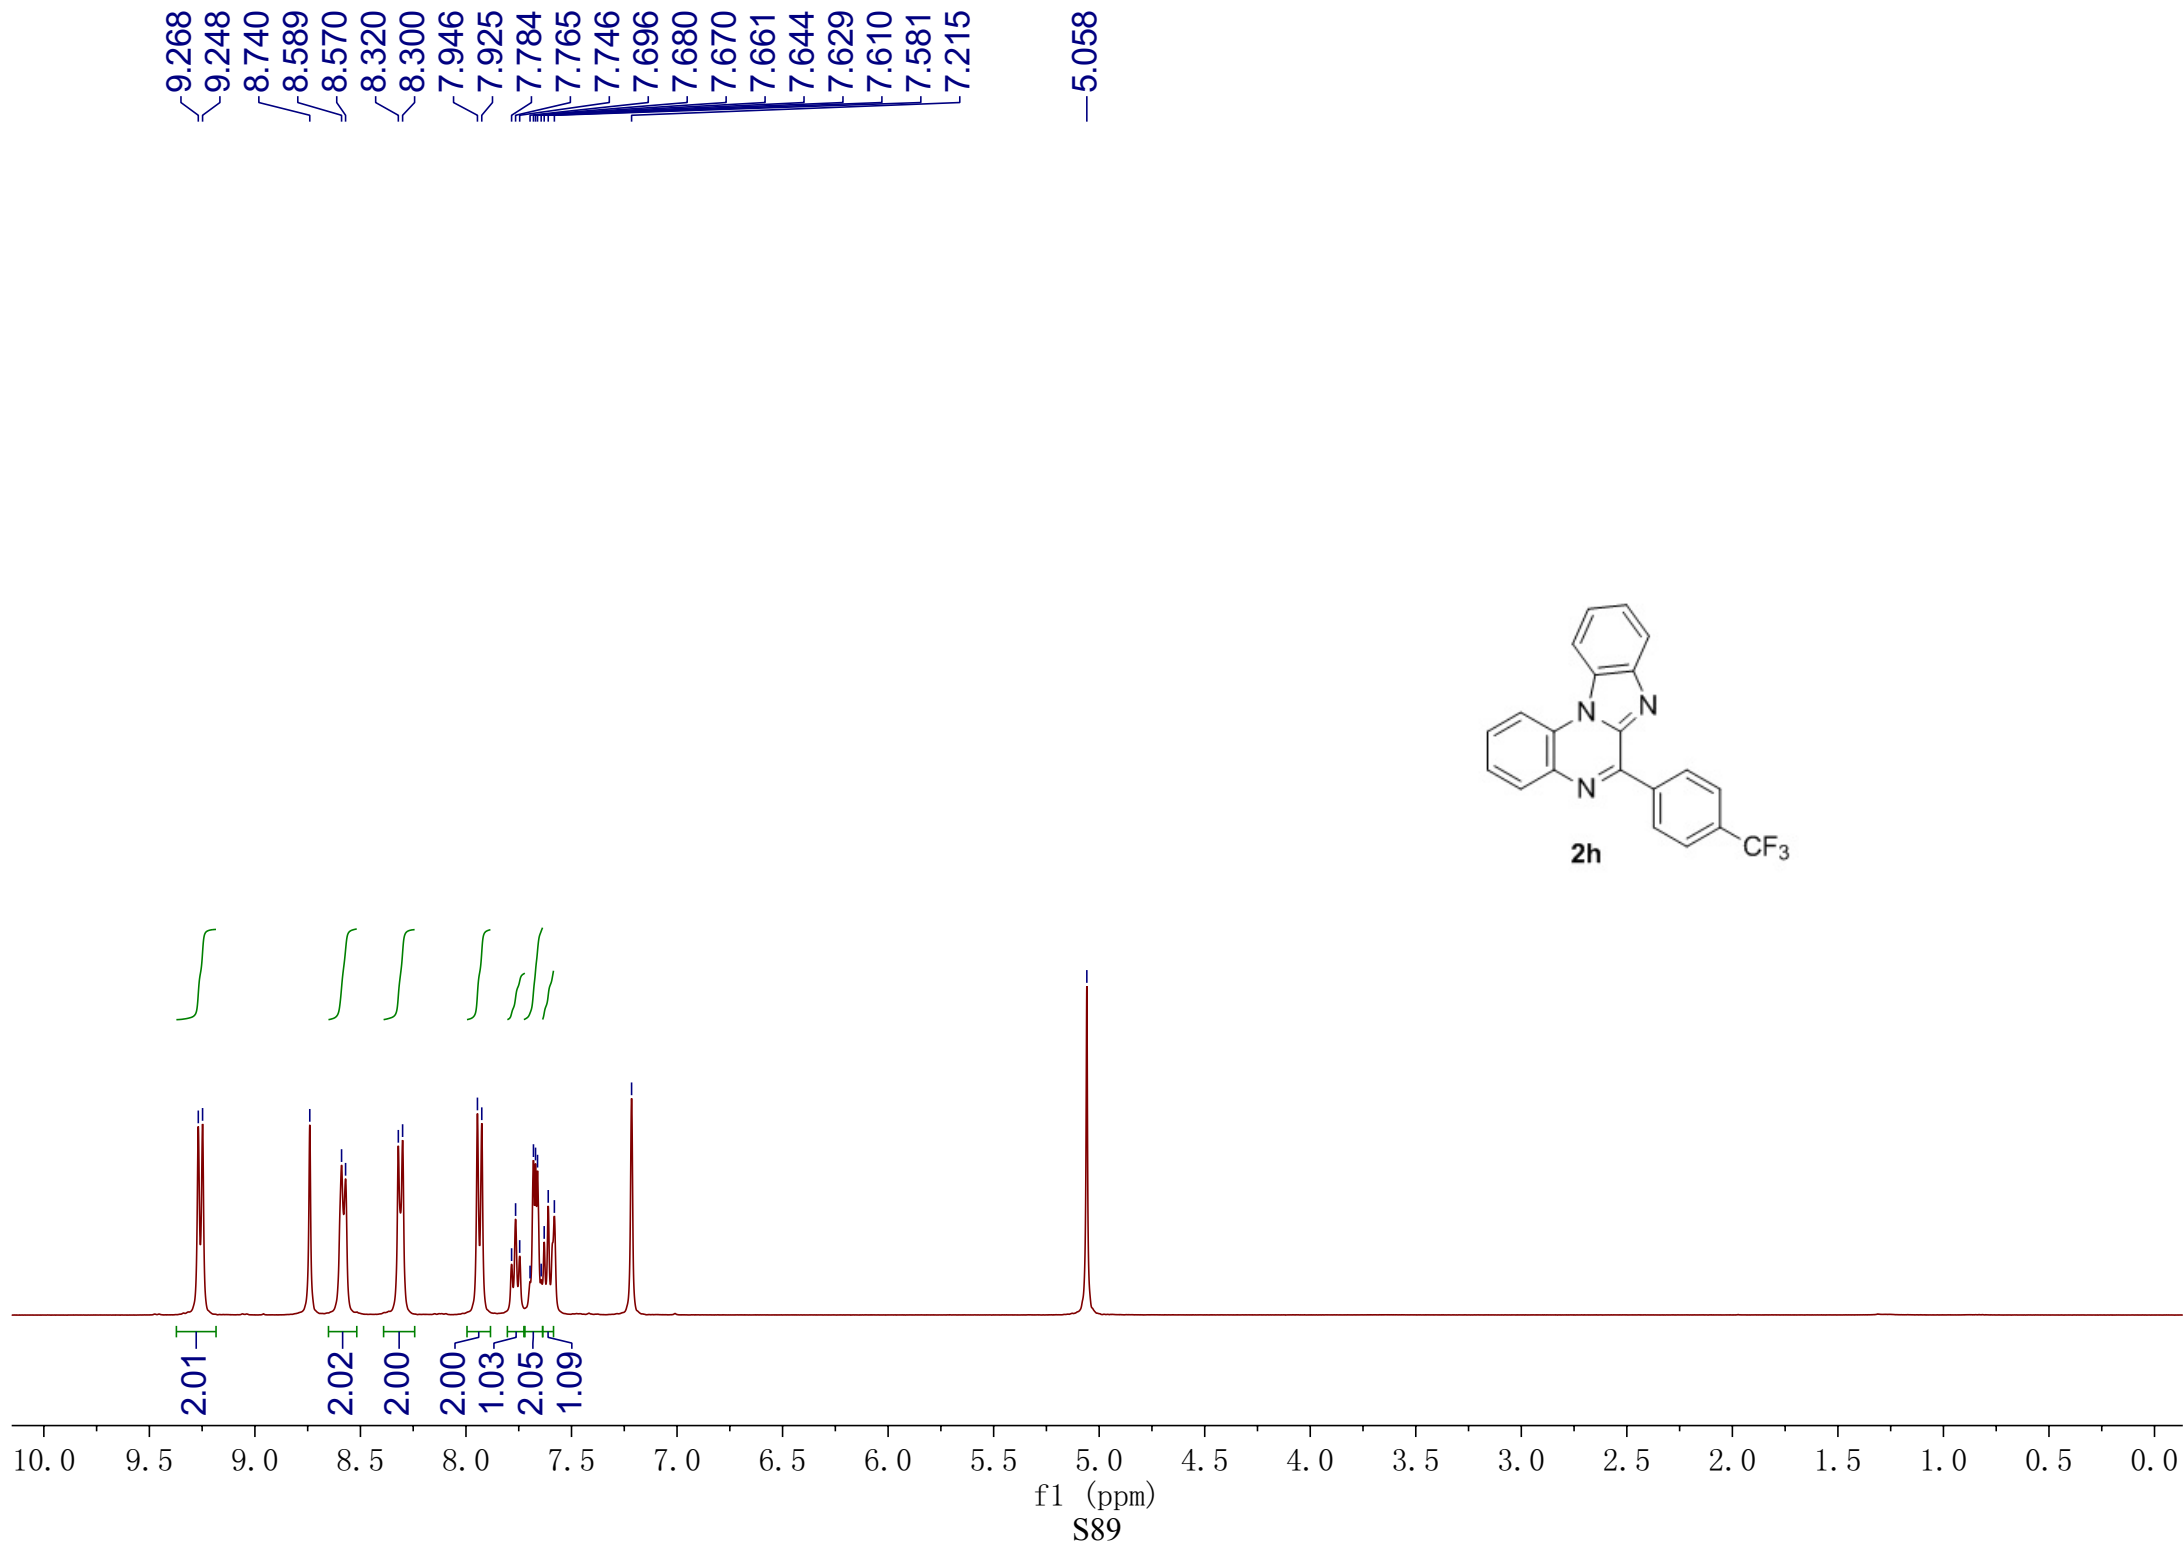

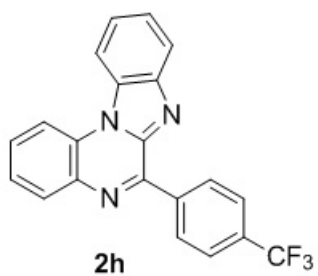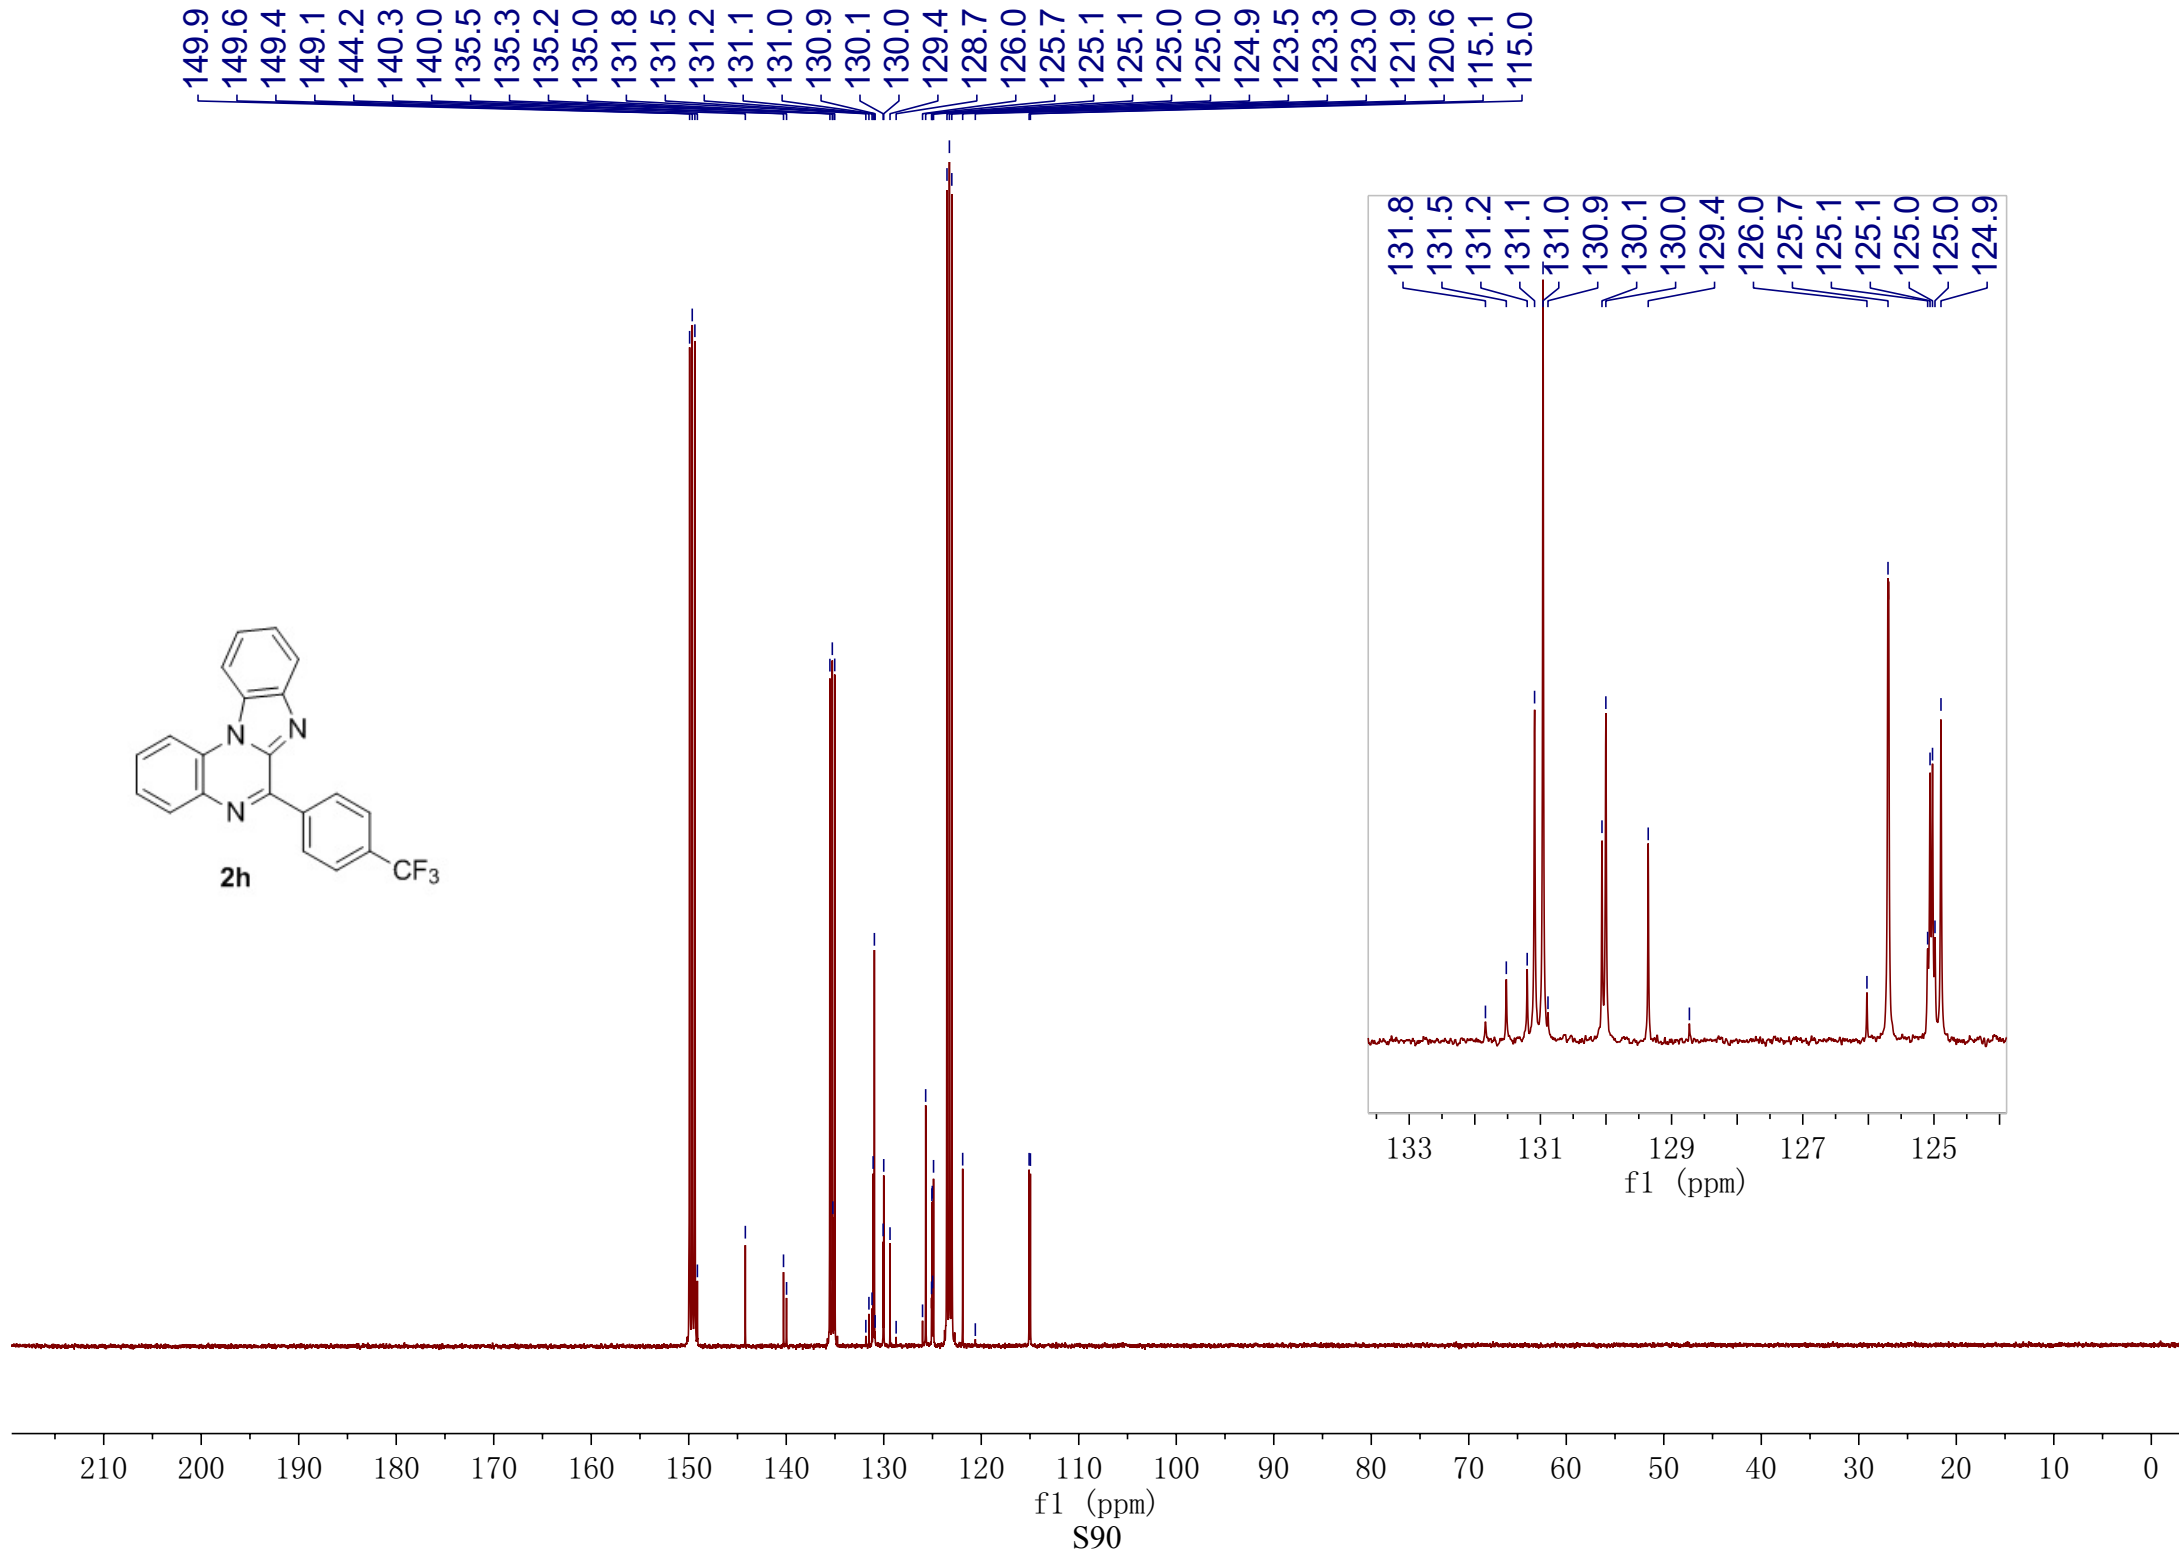

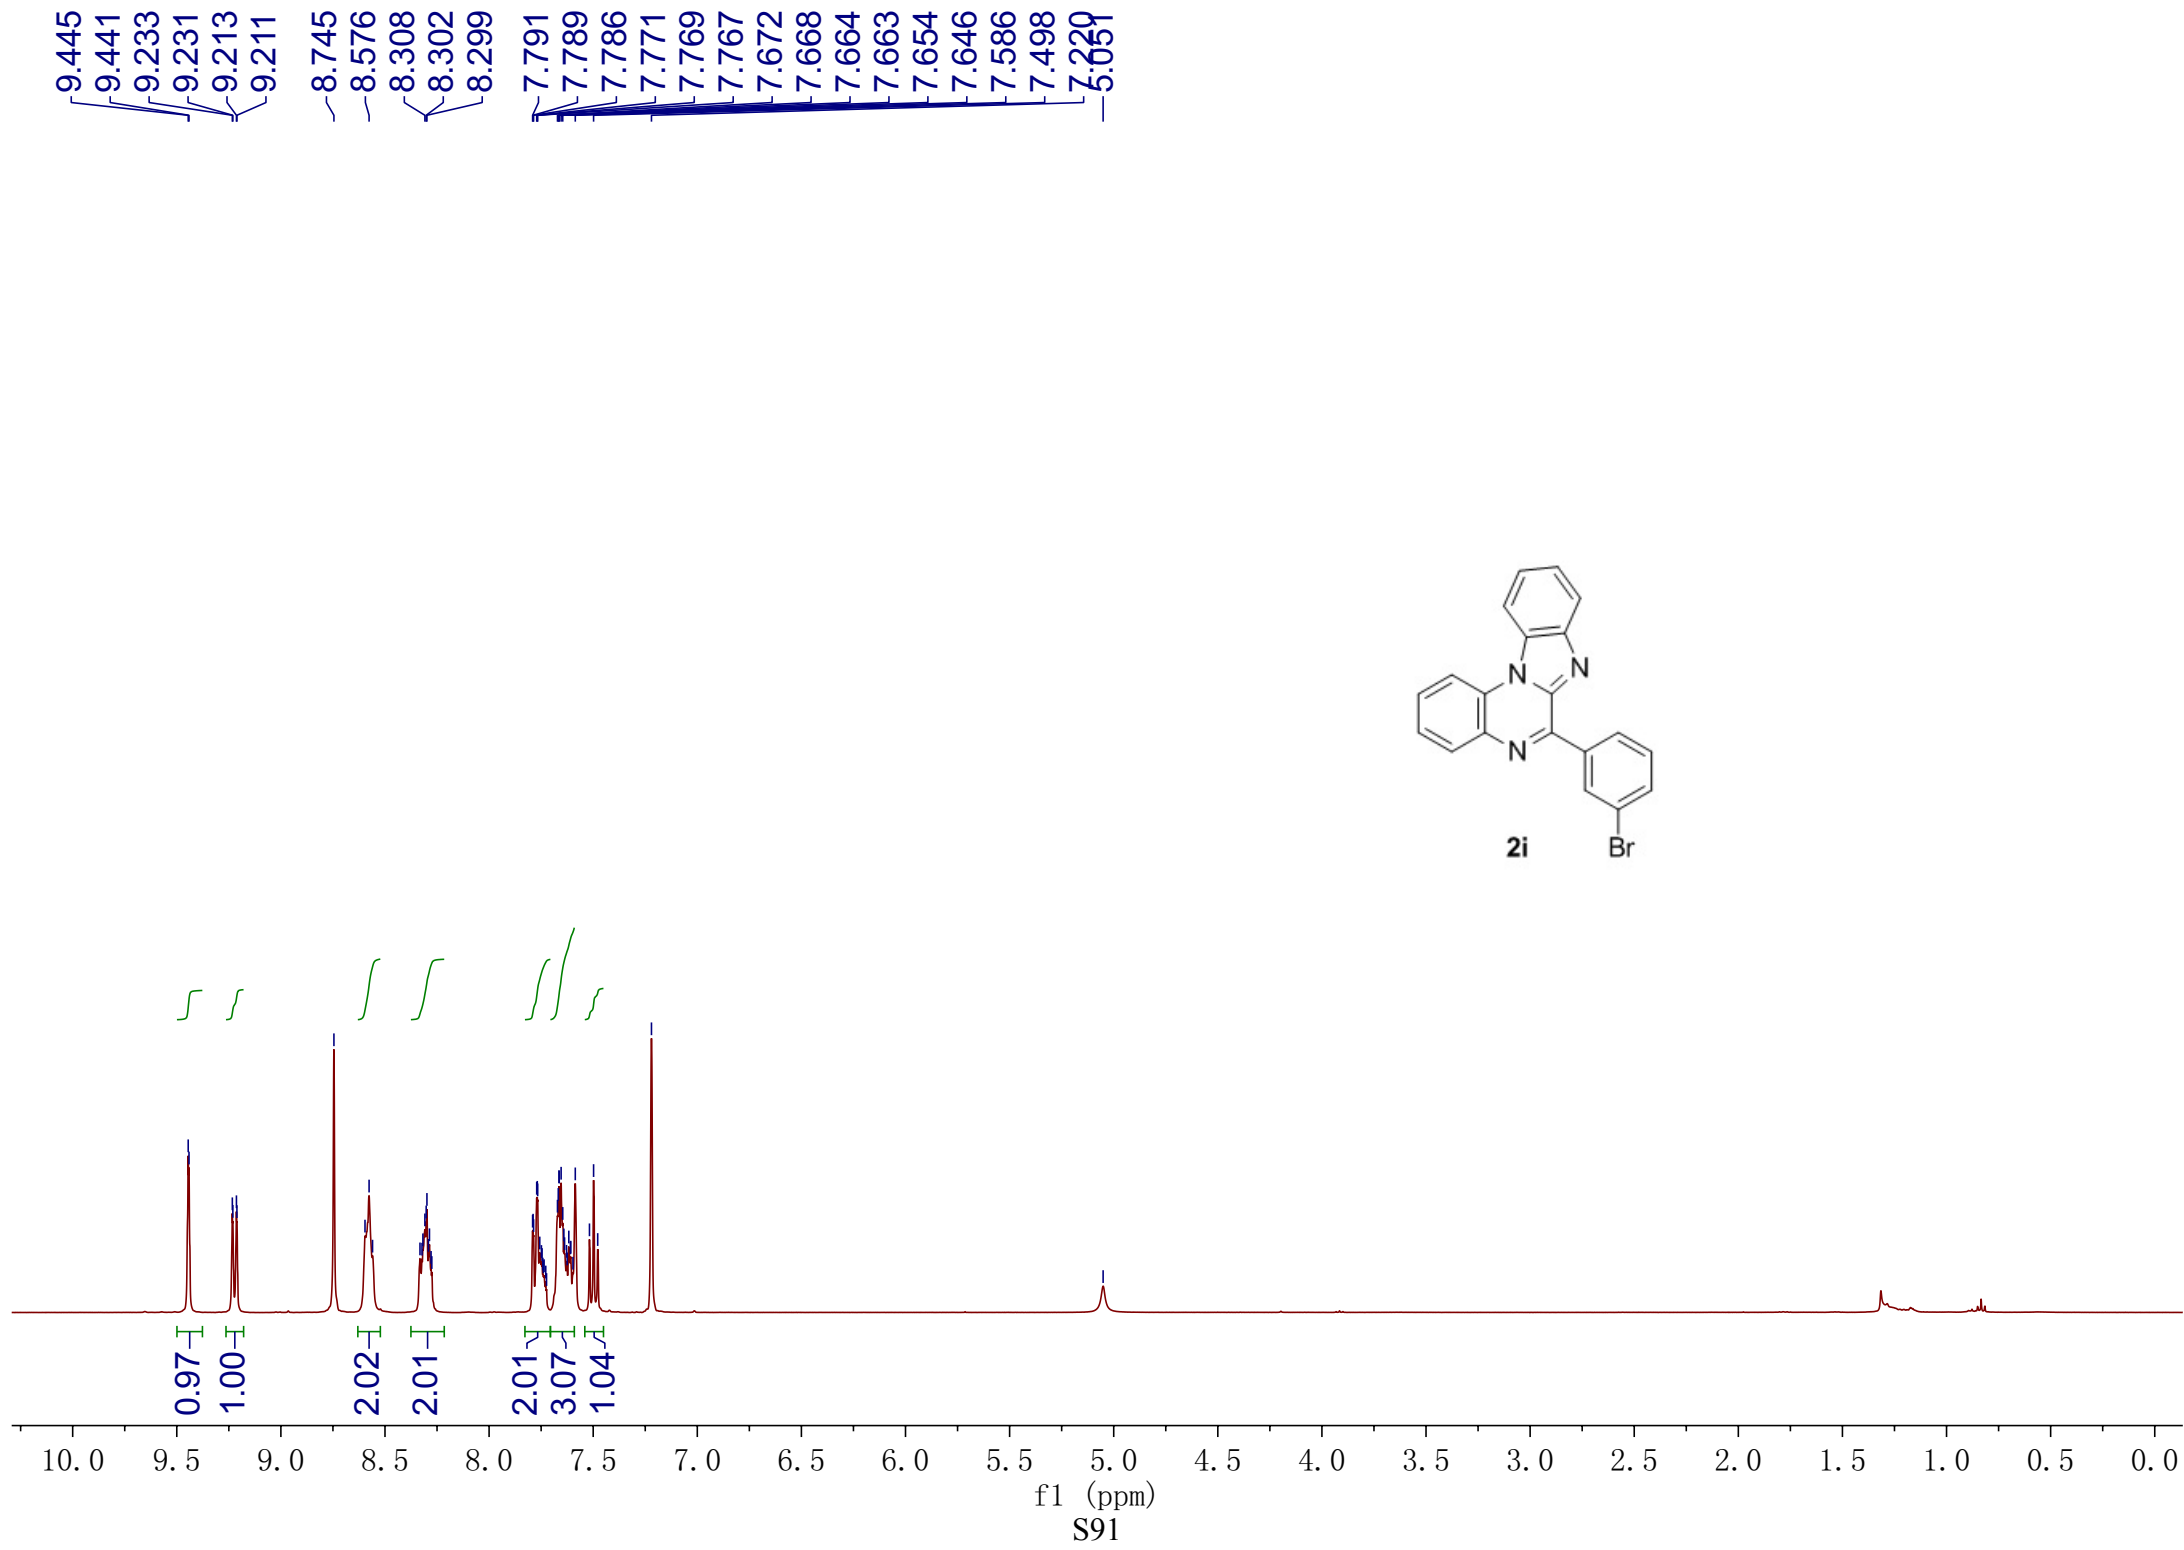

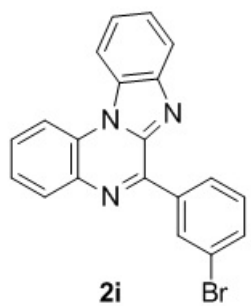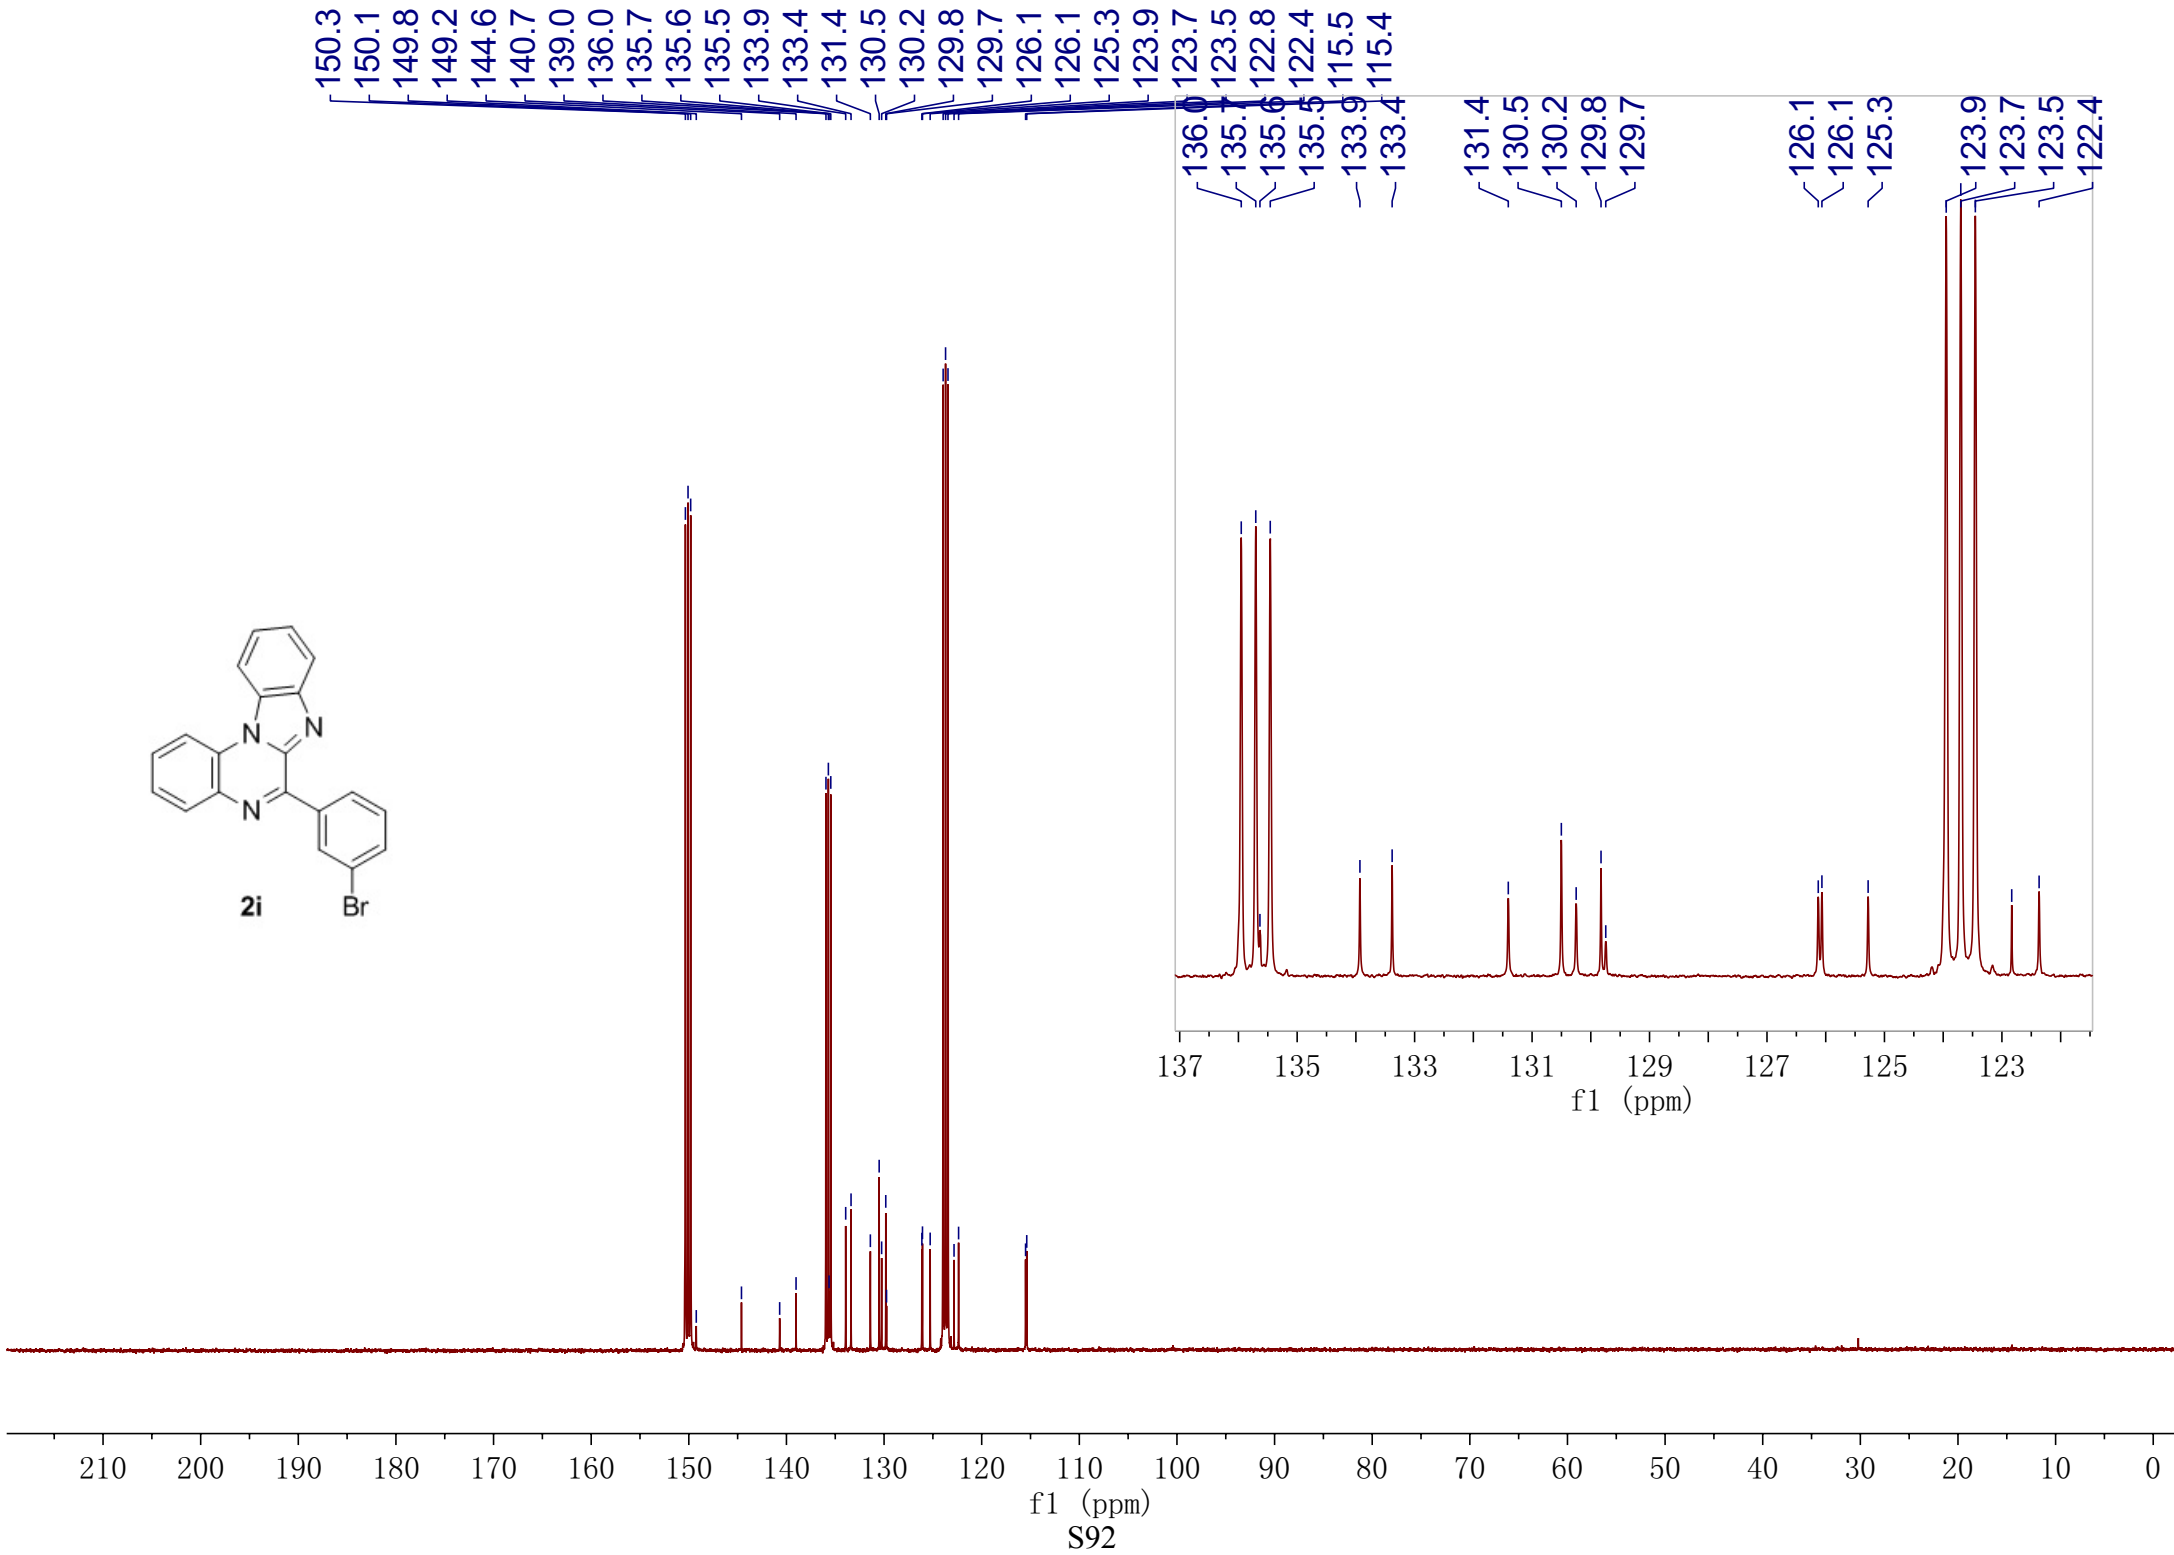



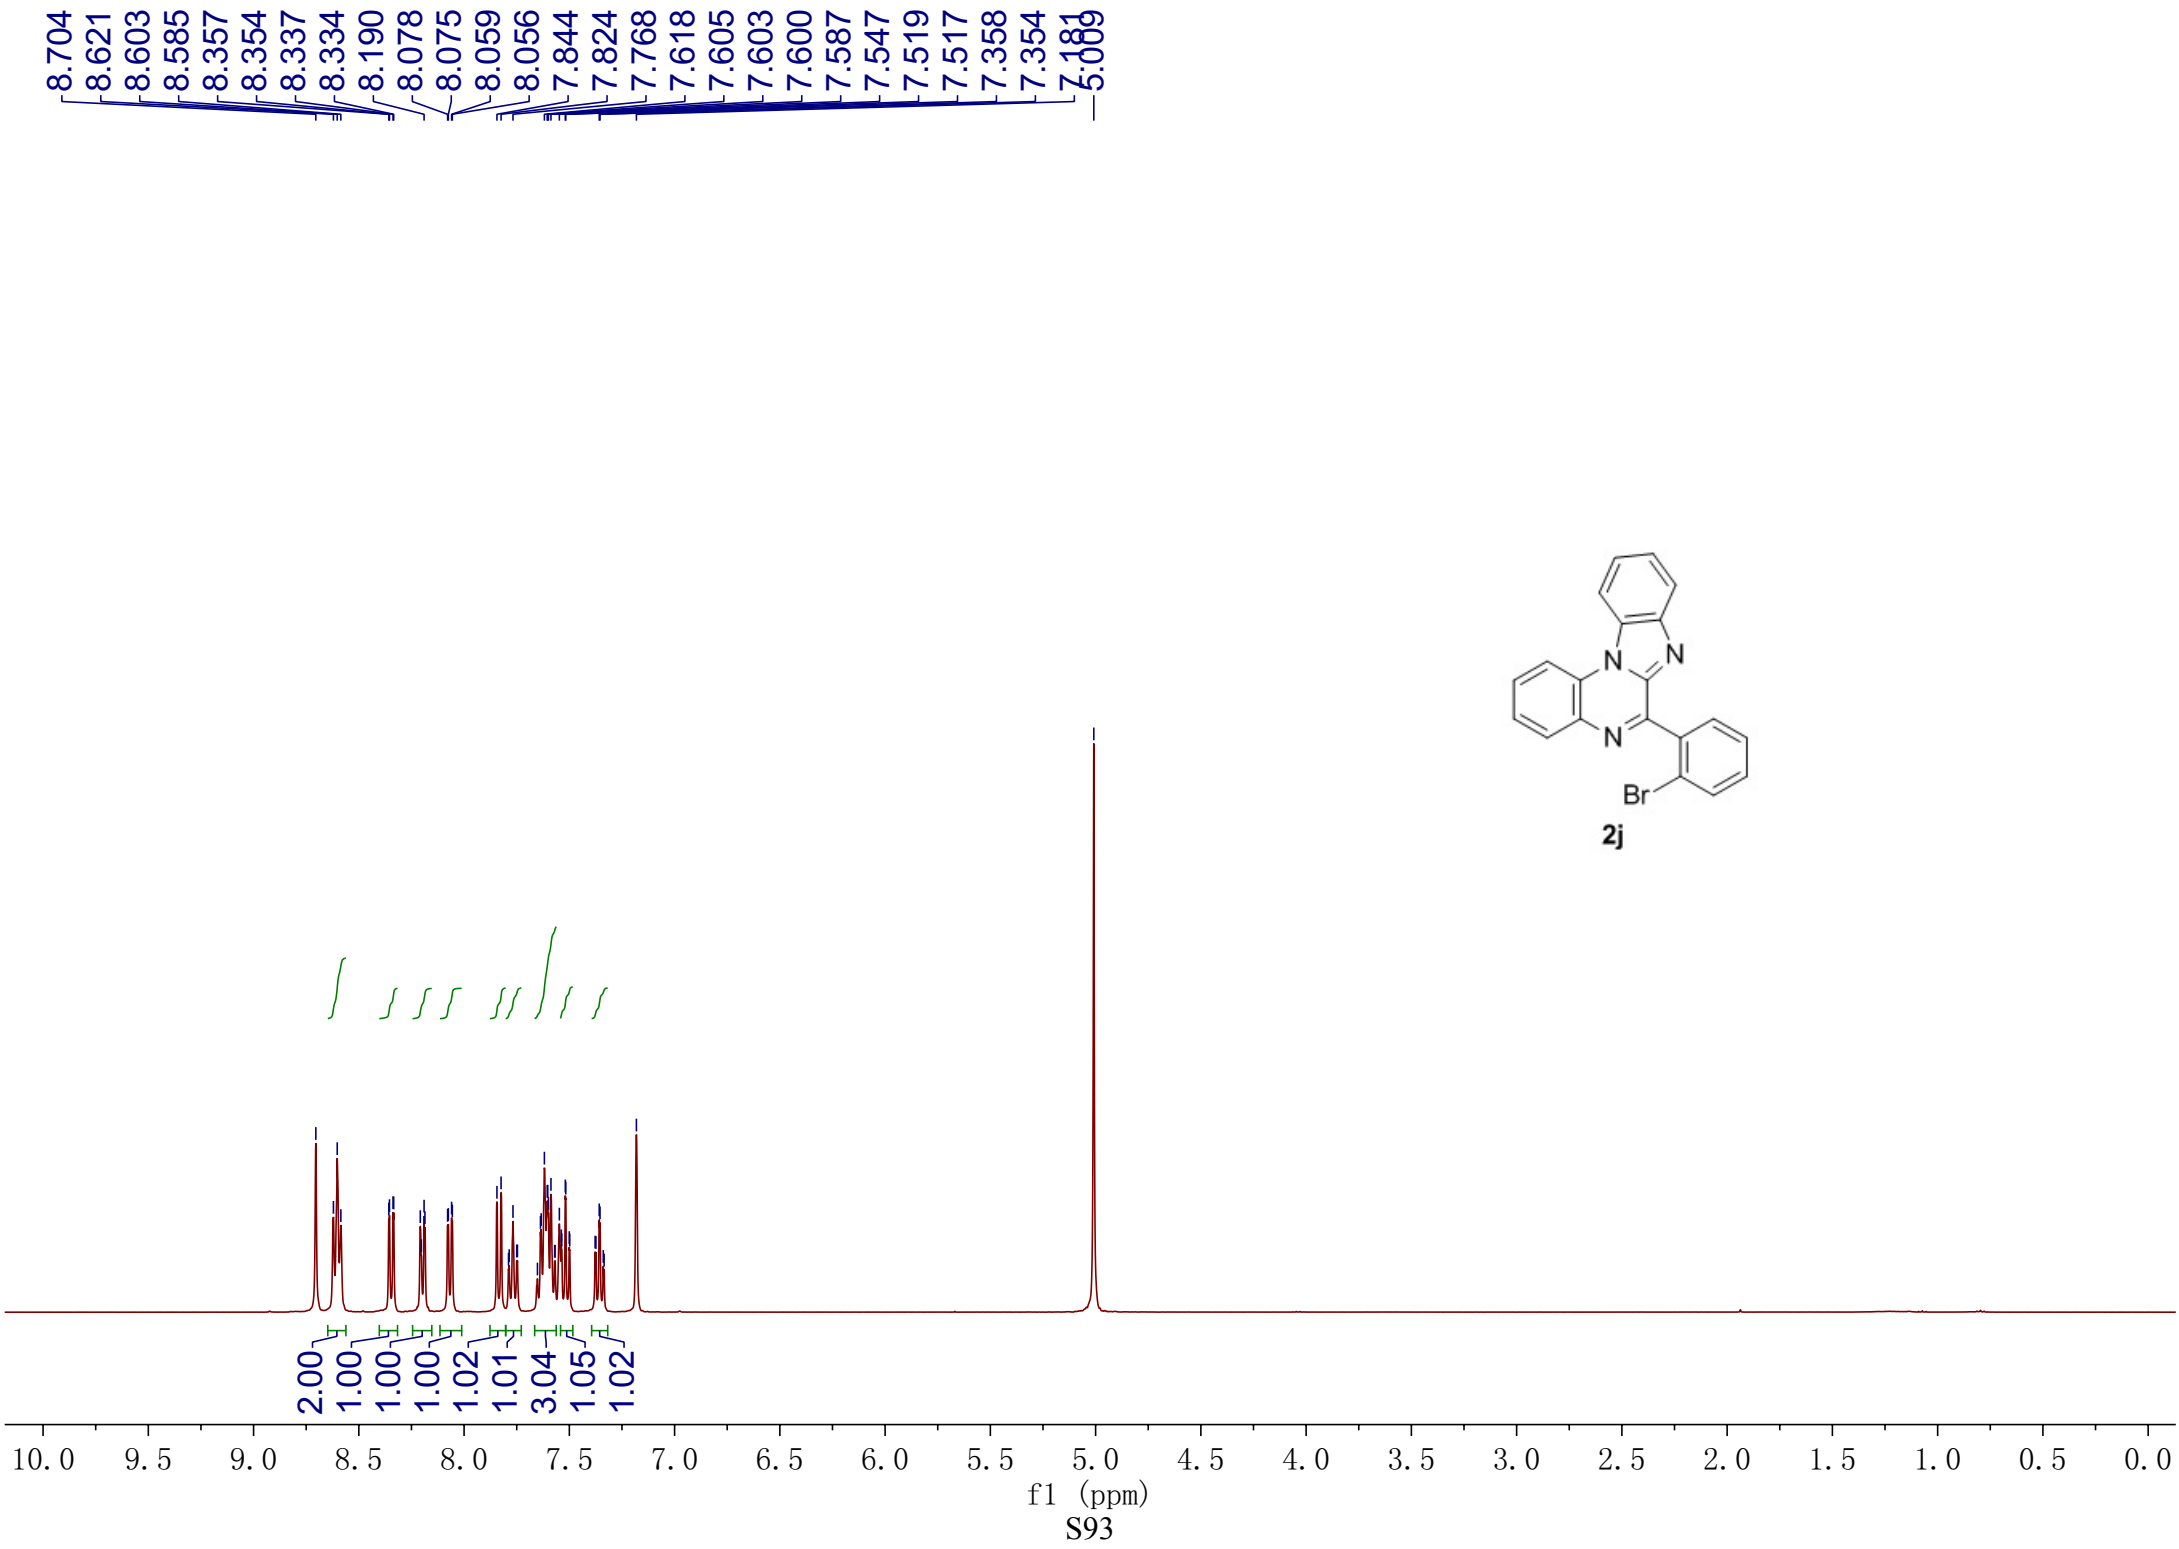

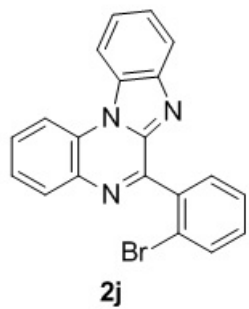

154.1  
149.9  
149.6  
149.4  
144.7  
140.8  
138.3  
135.5  
135.5  
135.3  
135.0  
133.2  
131.9  
131.1  
131.0  
130.6  
130.1  
129.7  
127.5  
125.7  
125.6  
124.8  
123.5  
123.3  
123.0  
122.9  
122.0  
115.4  
115.1

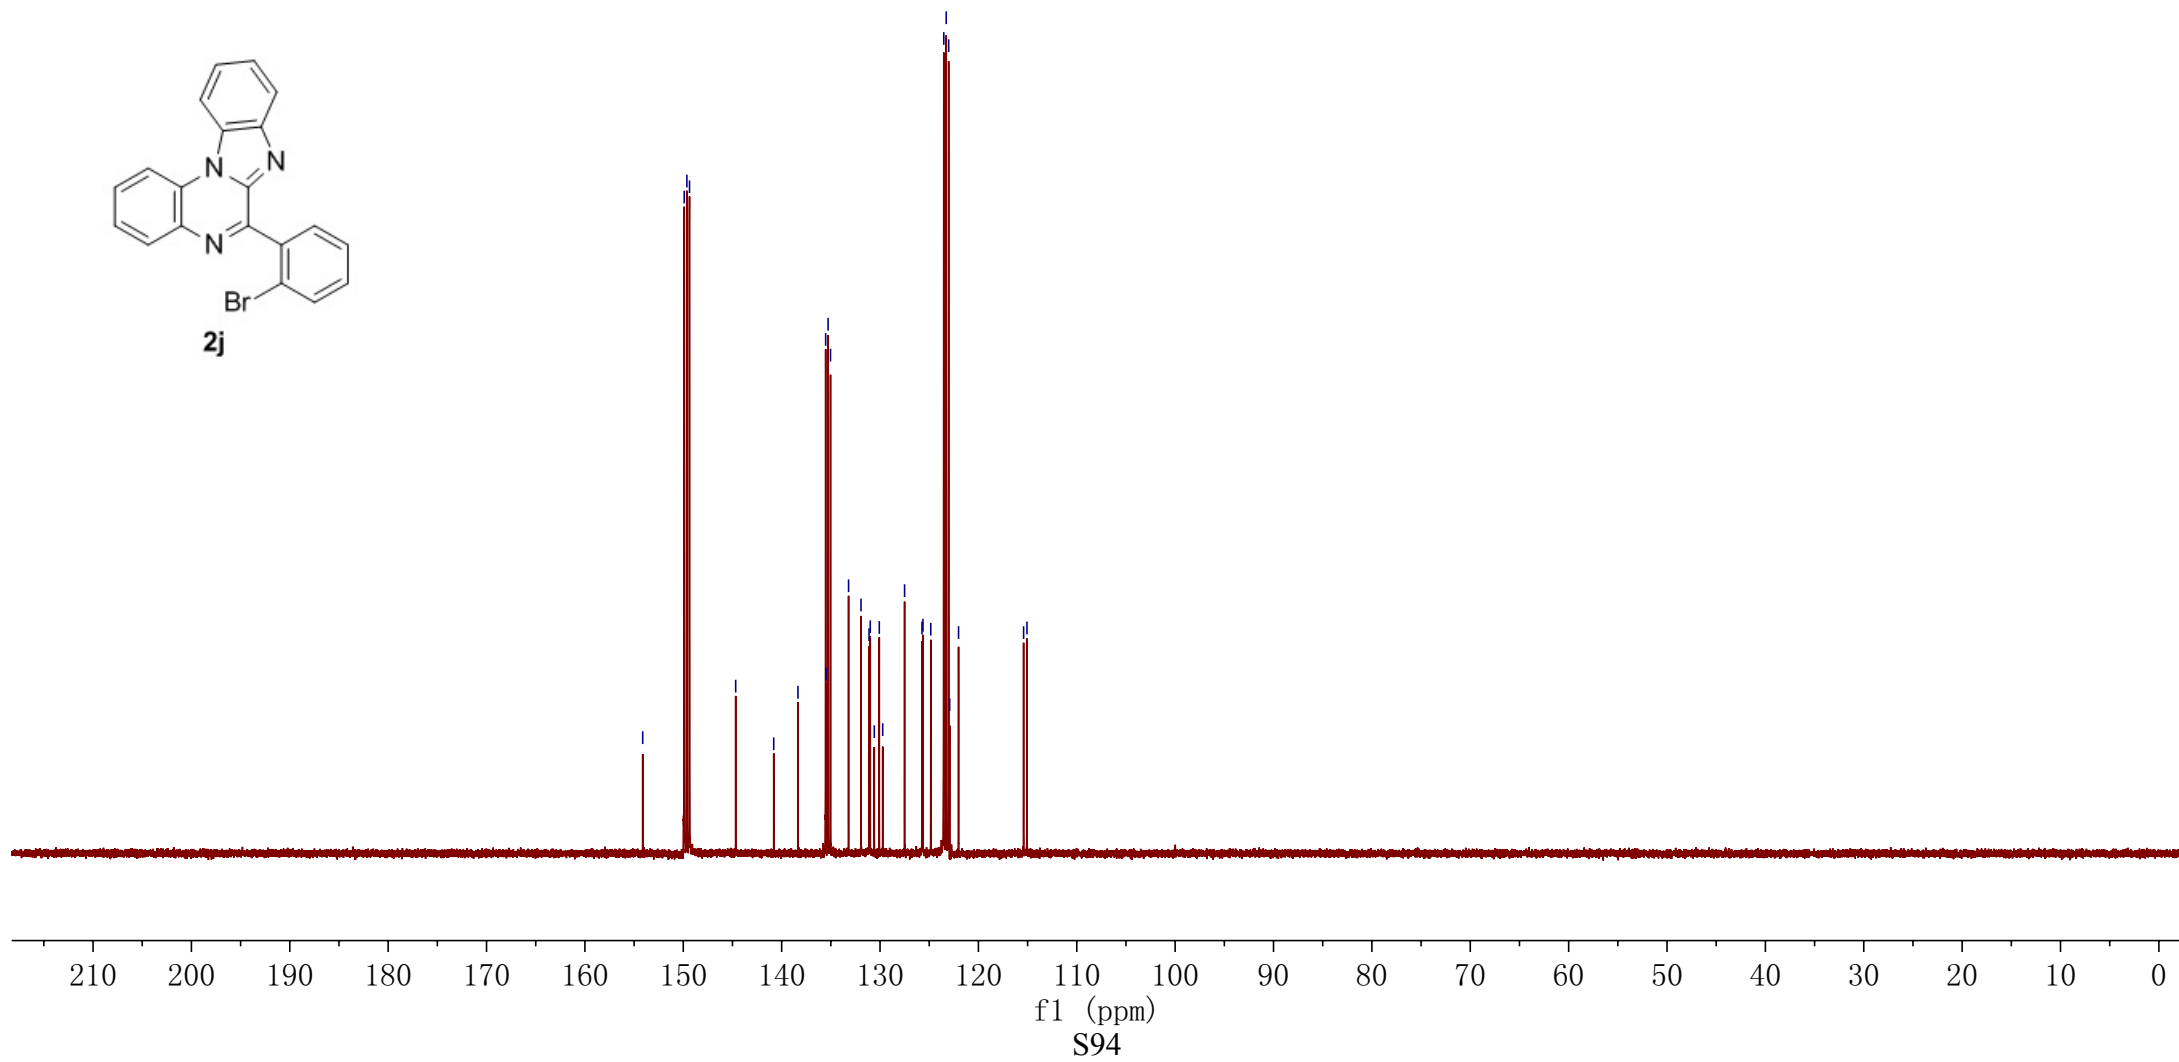

8.566  
8.545  
8.467  
8.461  
8.454  
8.444  
8.253  
8.250  
8.233  
8.229  
8.165  
8.154  
8.148  
8.142  
7.794  
7.791  
7.773  
7.755  
7.752  
7.635  
7.630  
7.616  
7.612  
7.602  
7.592  
7.588  
7.575  
7.503  
7.297  
7.277  
7.261  
7.250  
7.242

2.411  
2.331

0.000

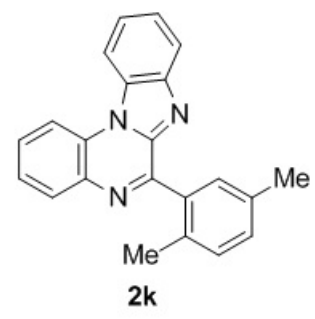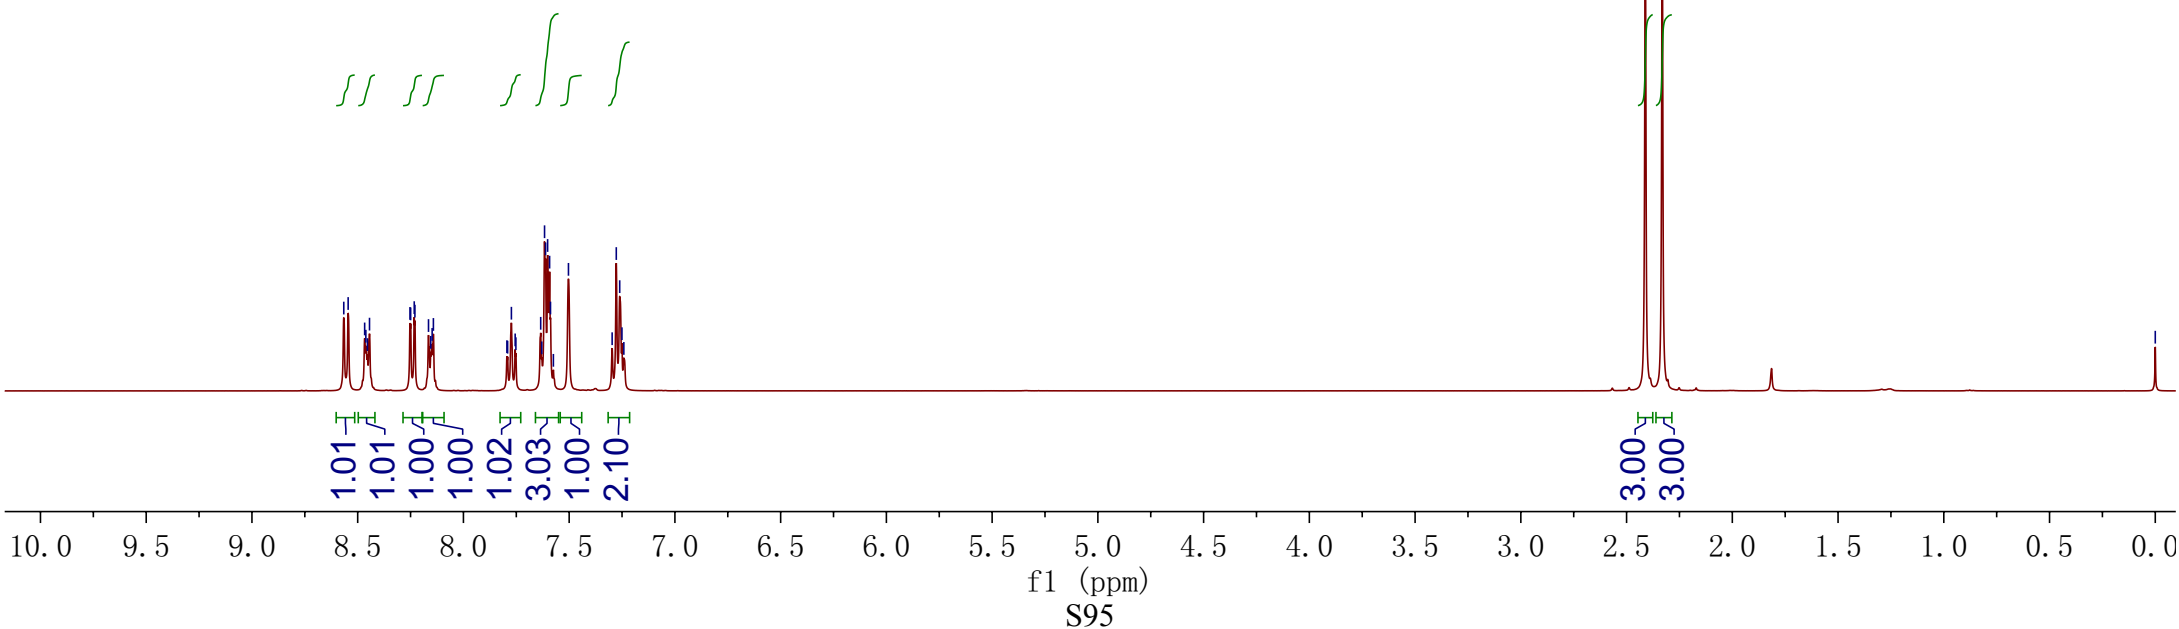

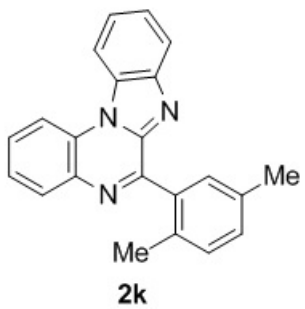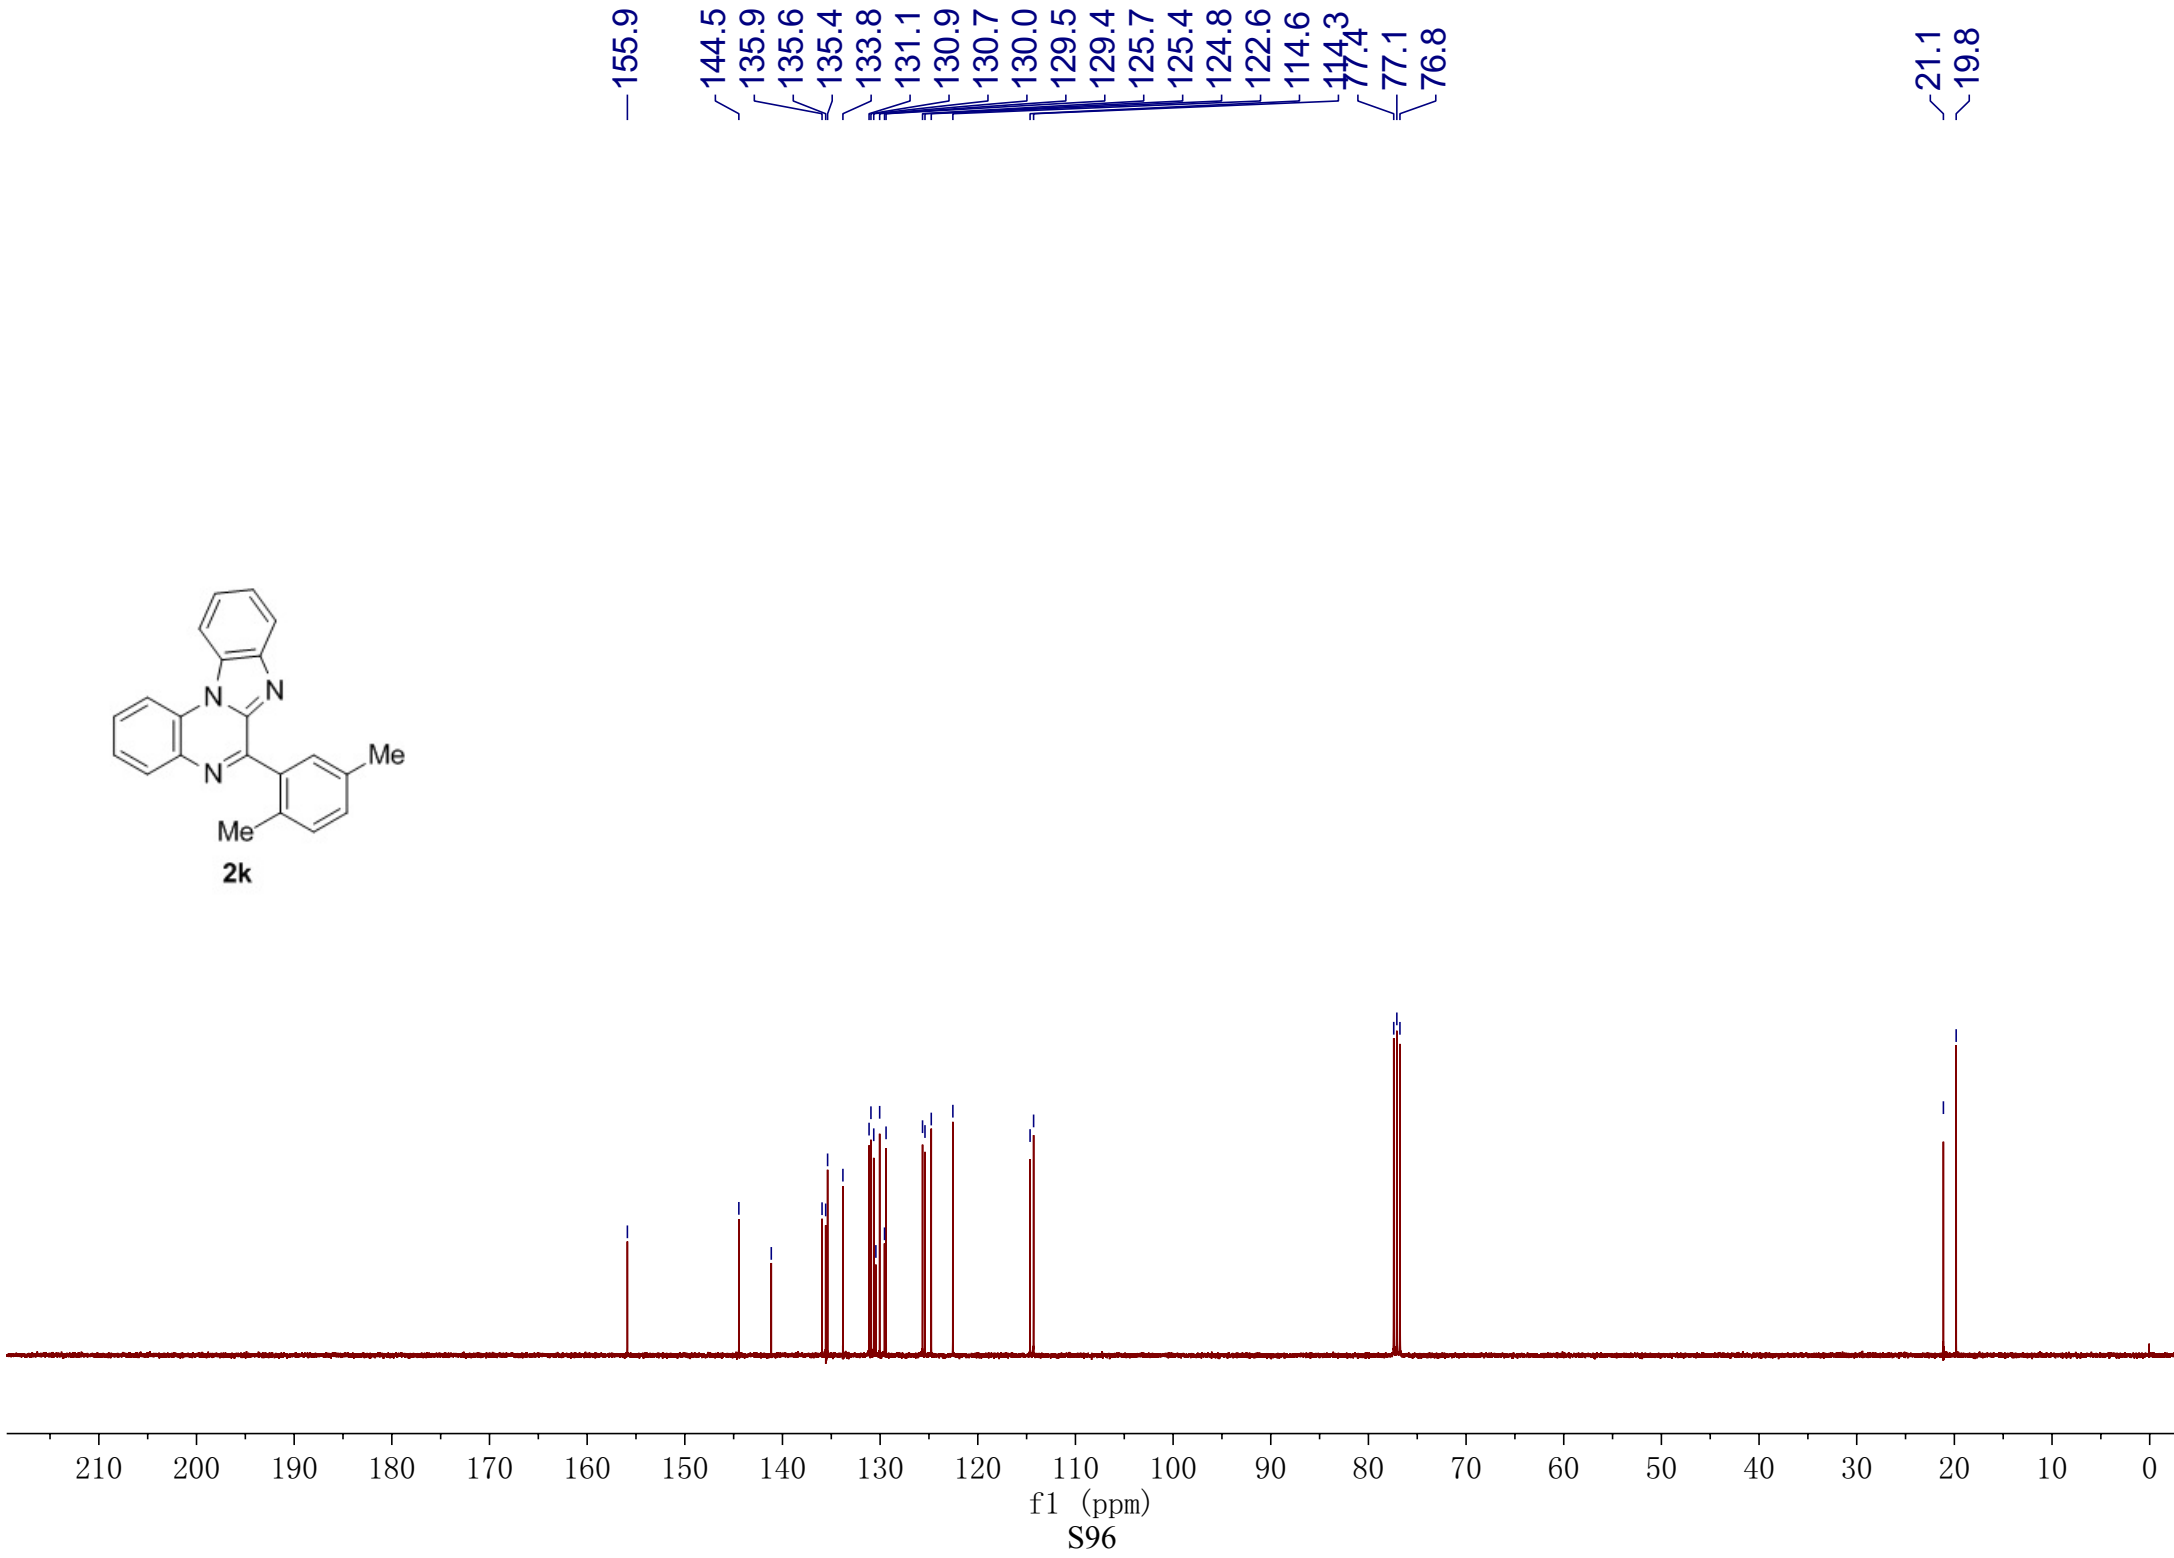

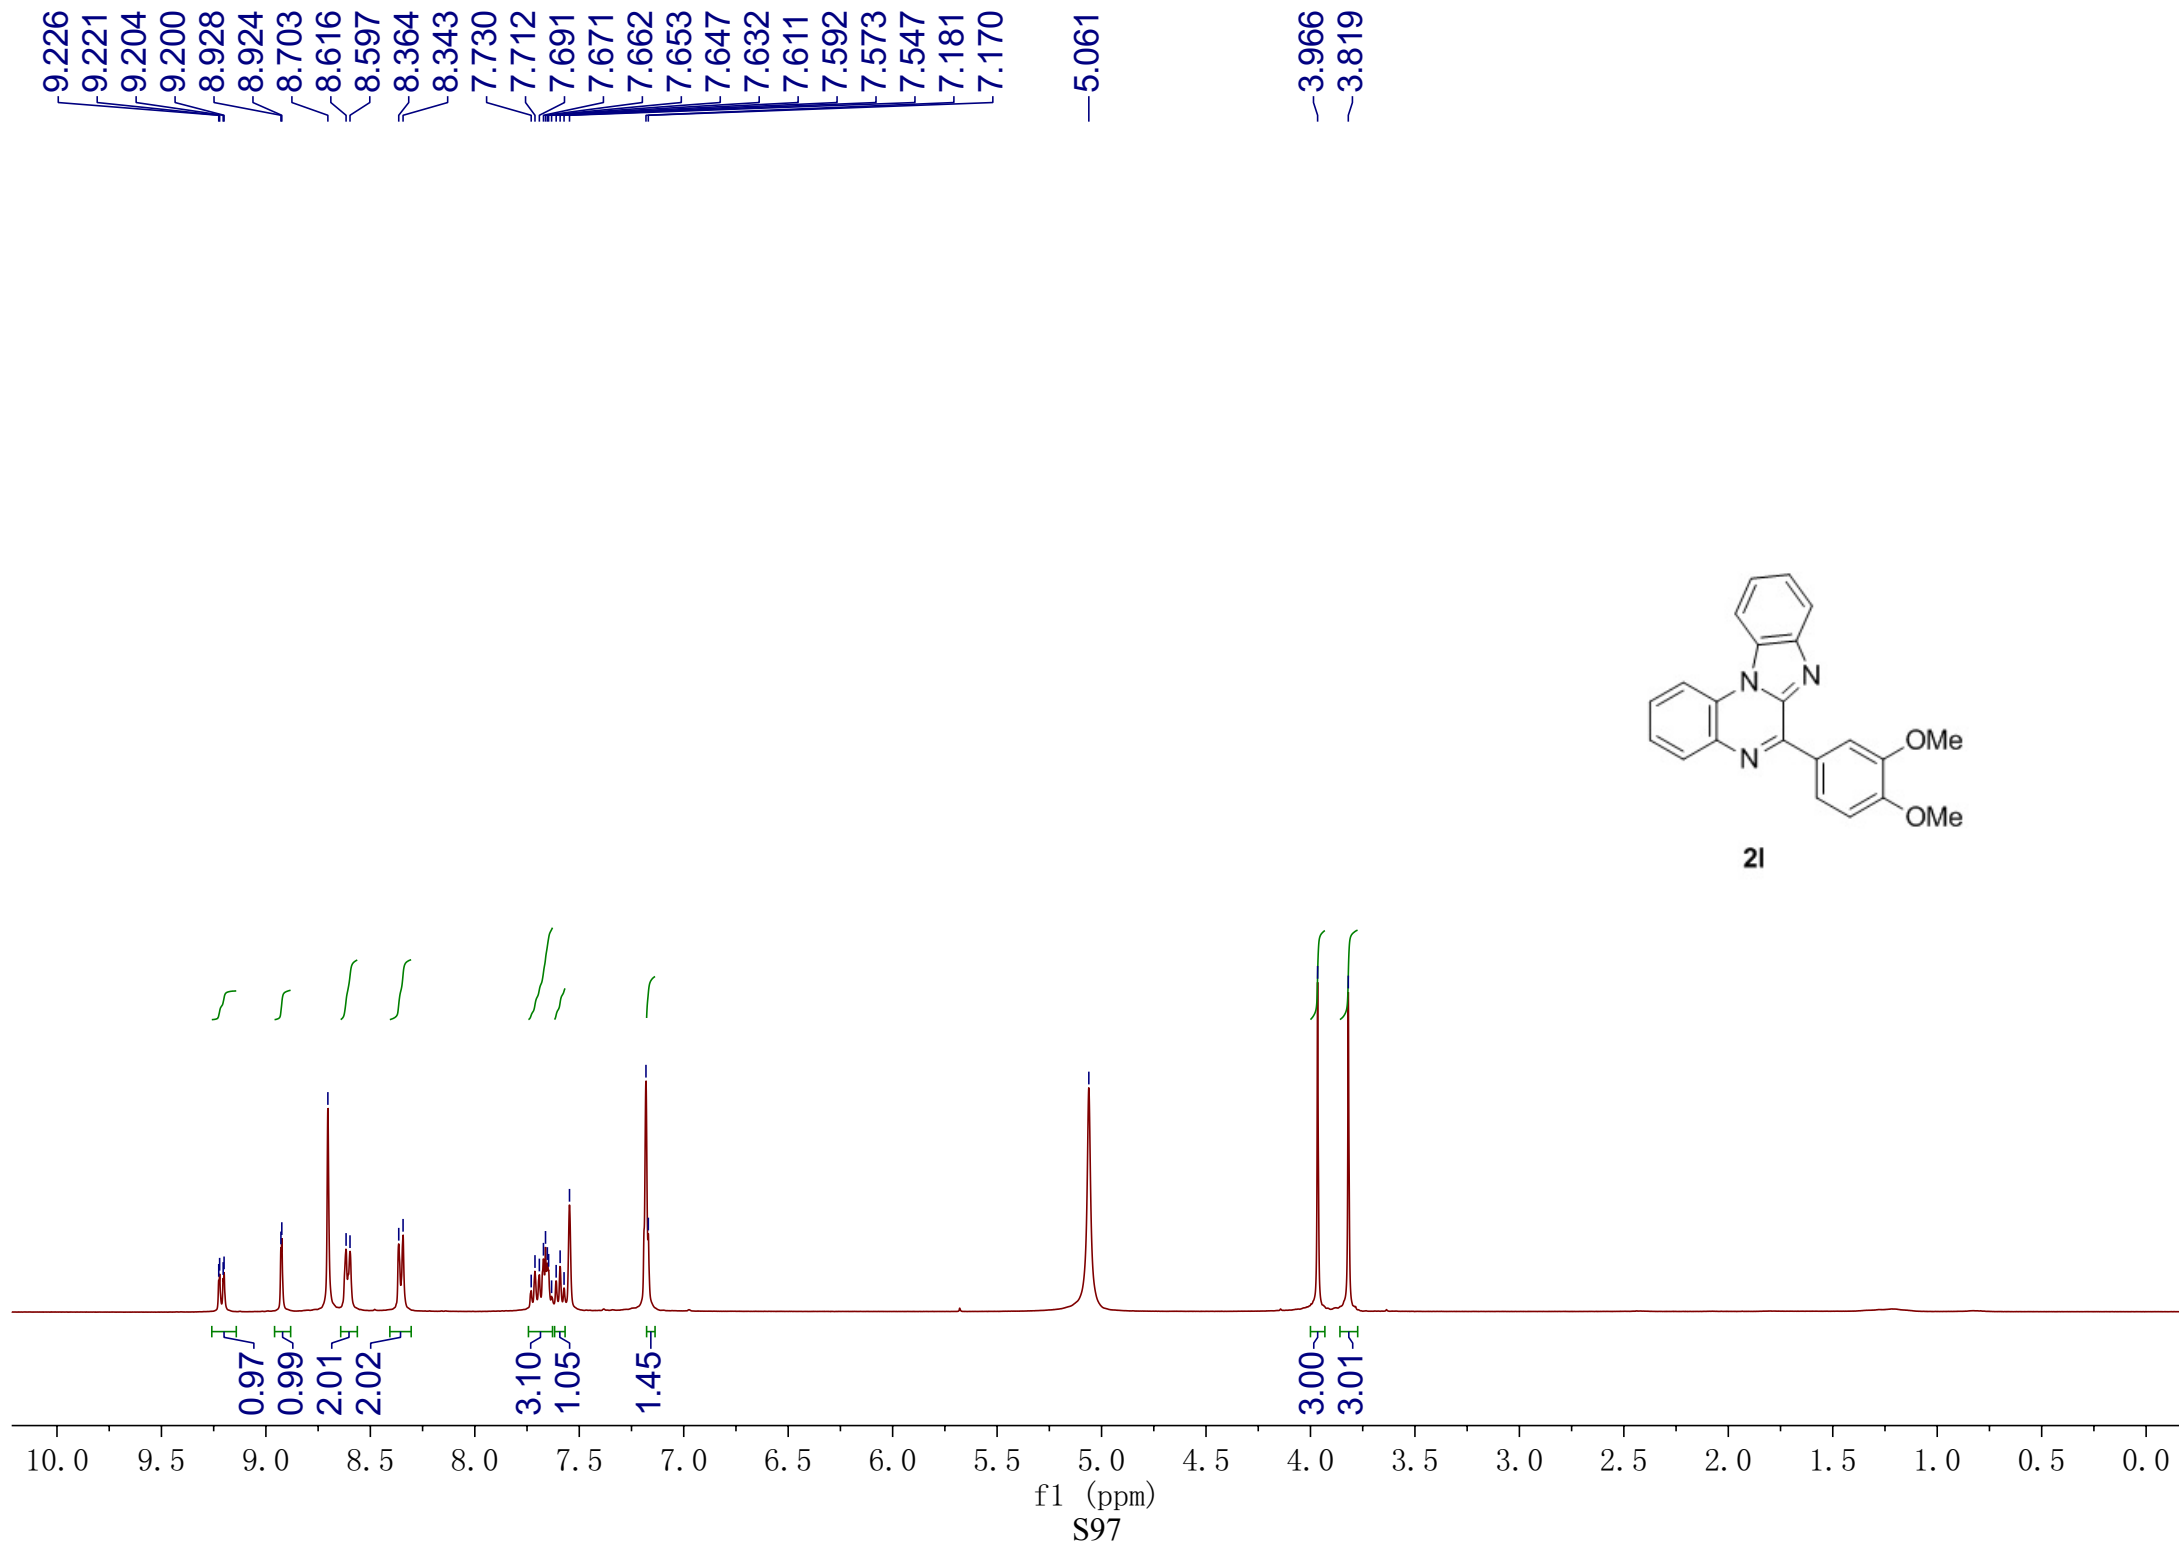

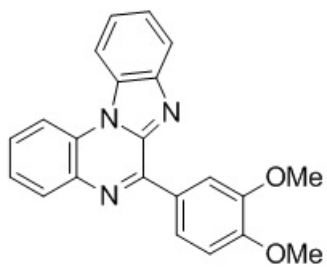

21

152.3  
150.1  
149.9  
149.6  
149.4  
149.3  
144.3  
140.8  
135.6  
135.5  
135.3  
135.3  
135.0  
130.6  
130.2  
129.4  
129.2  
128.9  
125.6  
125.5  
125.0  
124.7  
123.5  
123.3  
123.0  
122.0  
115.1  
115.0  
113.8  
111.2

55.8  
55.6

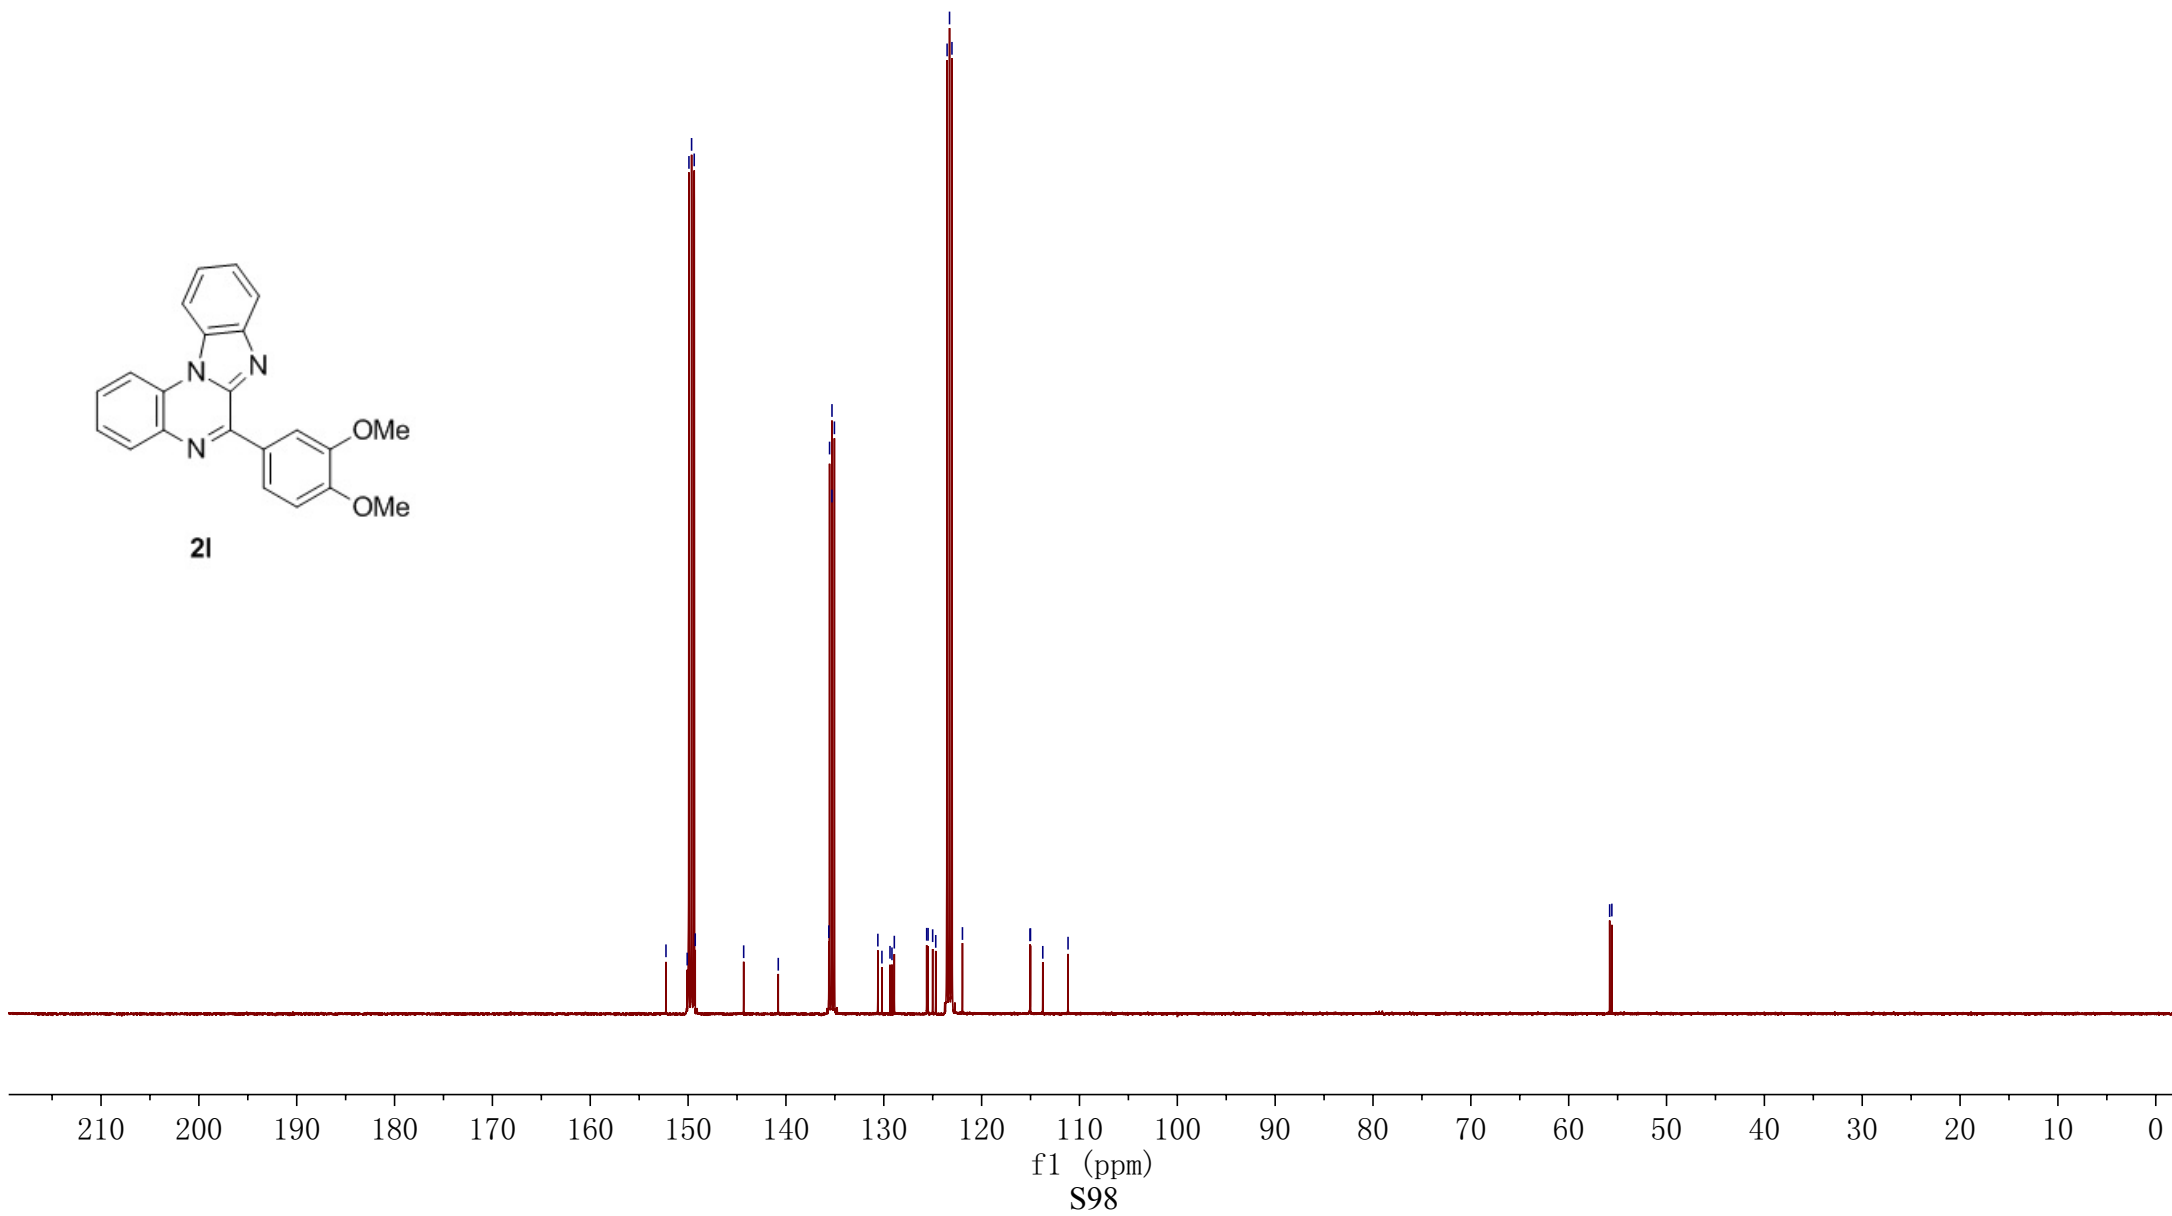

8.703  
8.681  
8.670  
8.649  
8.431  
8.428  
8.413  
8.410  
8.341  
8.337  
8.166  
8.146  
8.082  
8.061  
7.692  
7.690  
7.658  
7.641  
7.621  
7.603  
7.600  
7.544  
7.515  
7.507  
7.499  
7.491  
7.178  
5.044

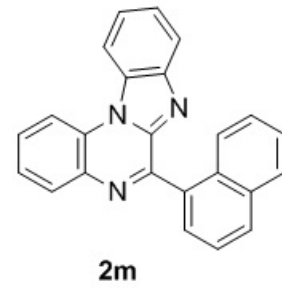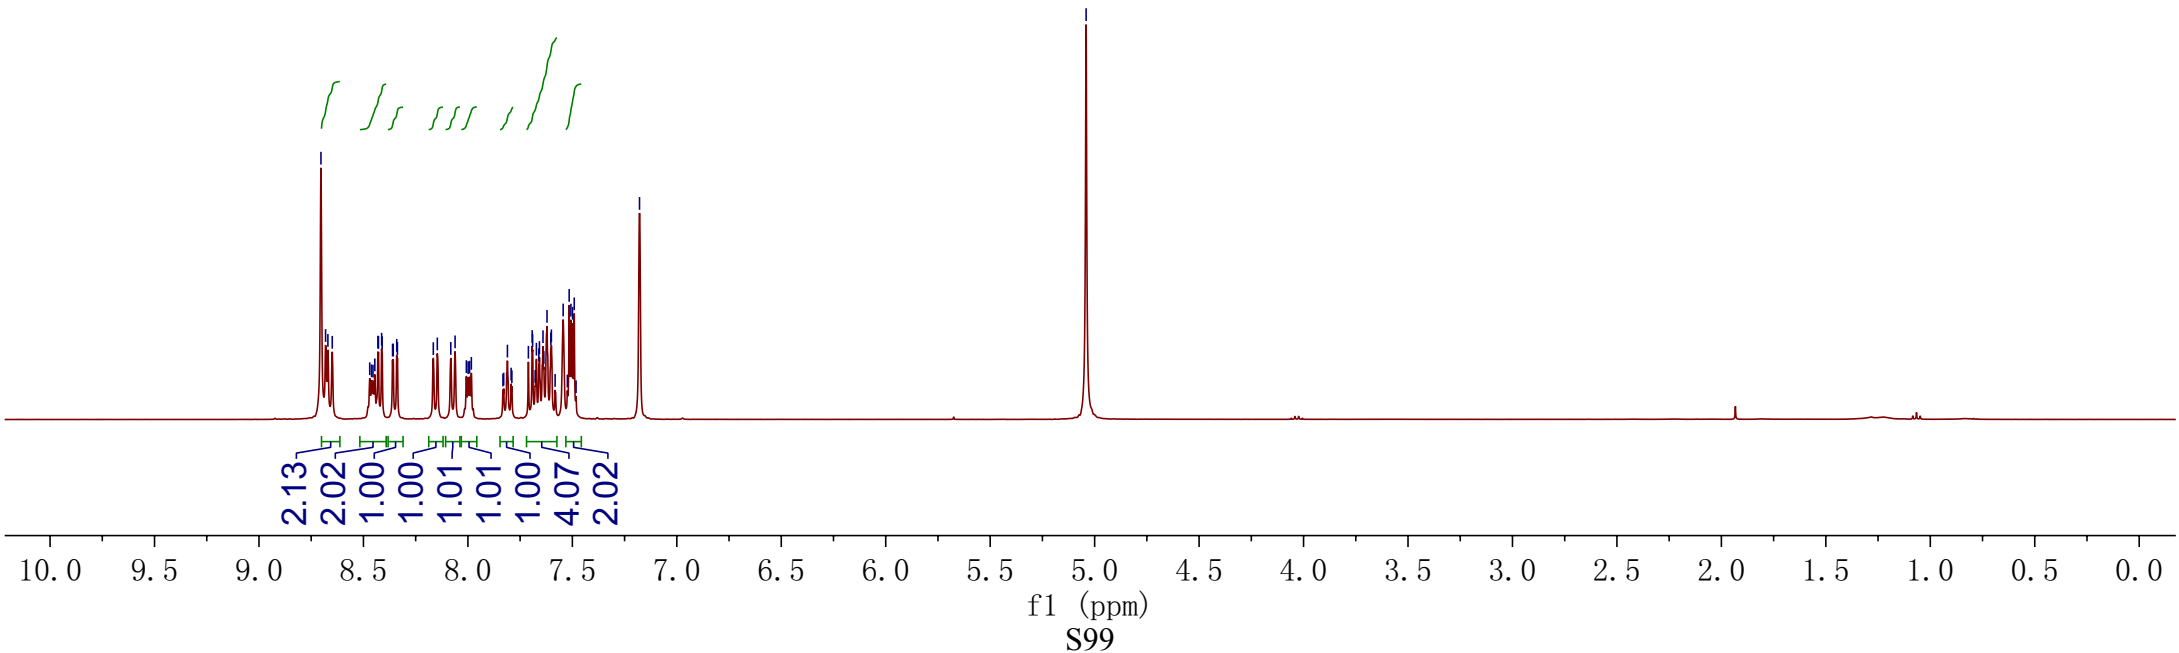

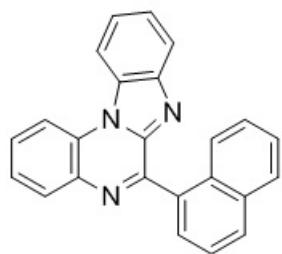

2m

154.2  
149.9  
149.6  
149.4  
144.6  
141.8  
135.7  
135.5  
135.3  
135.0  
134.4  
134.2  
132.2  
131.0  
130.7  
130.1  
129.8  
129.6  
129.3  
128.6  
126.7  
126.4  
126.2  
125.7  
125.5  
125.3  
124.8  
123.5  
123.3  
123.0  
122.0  
115.4  
115.1

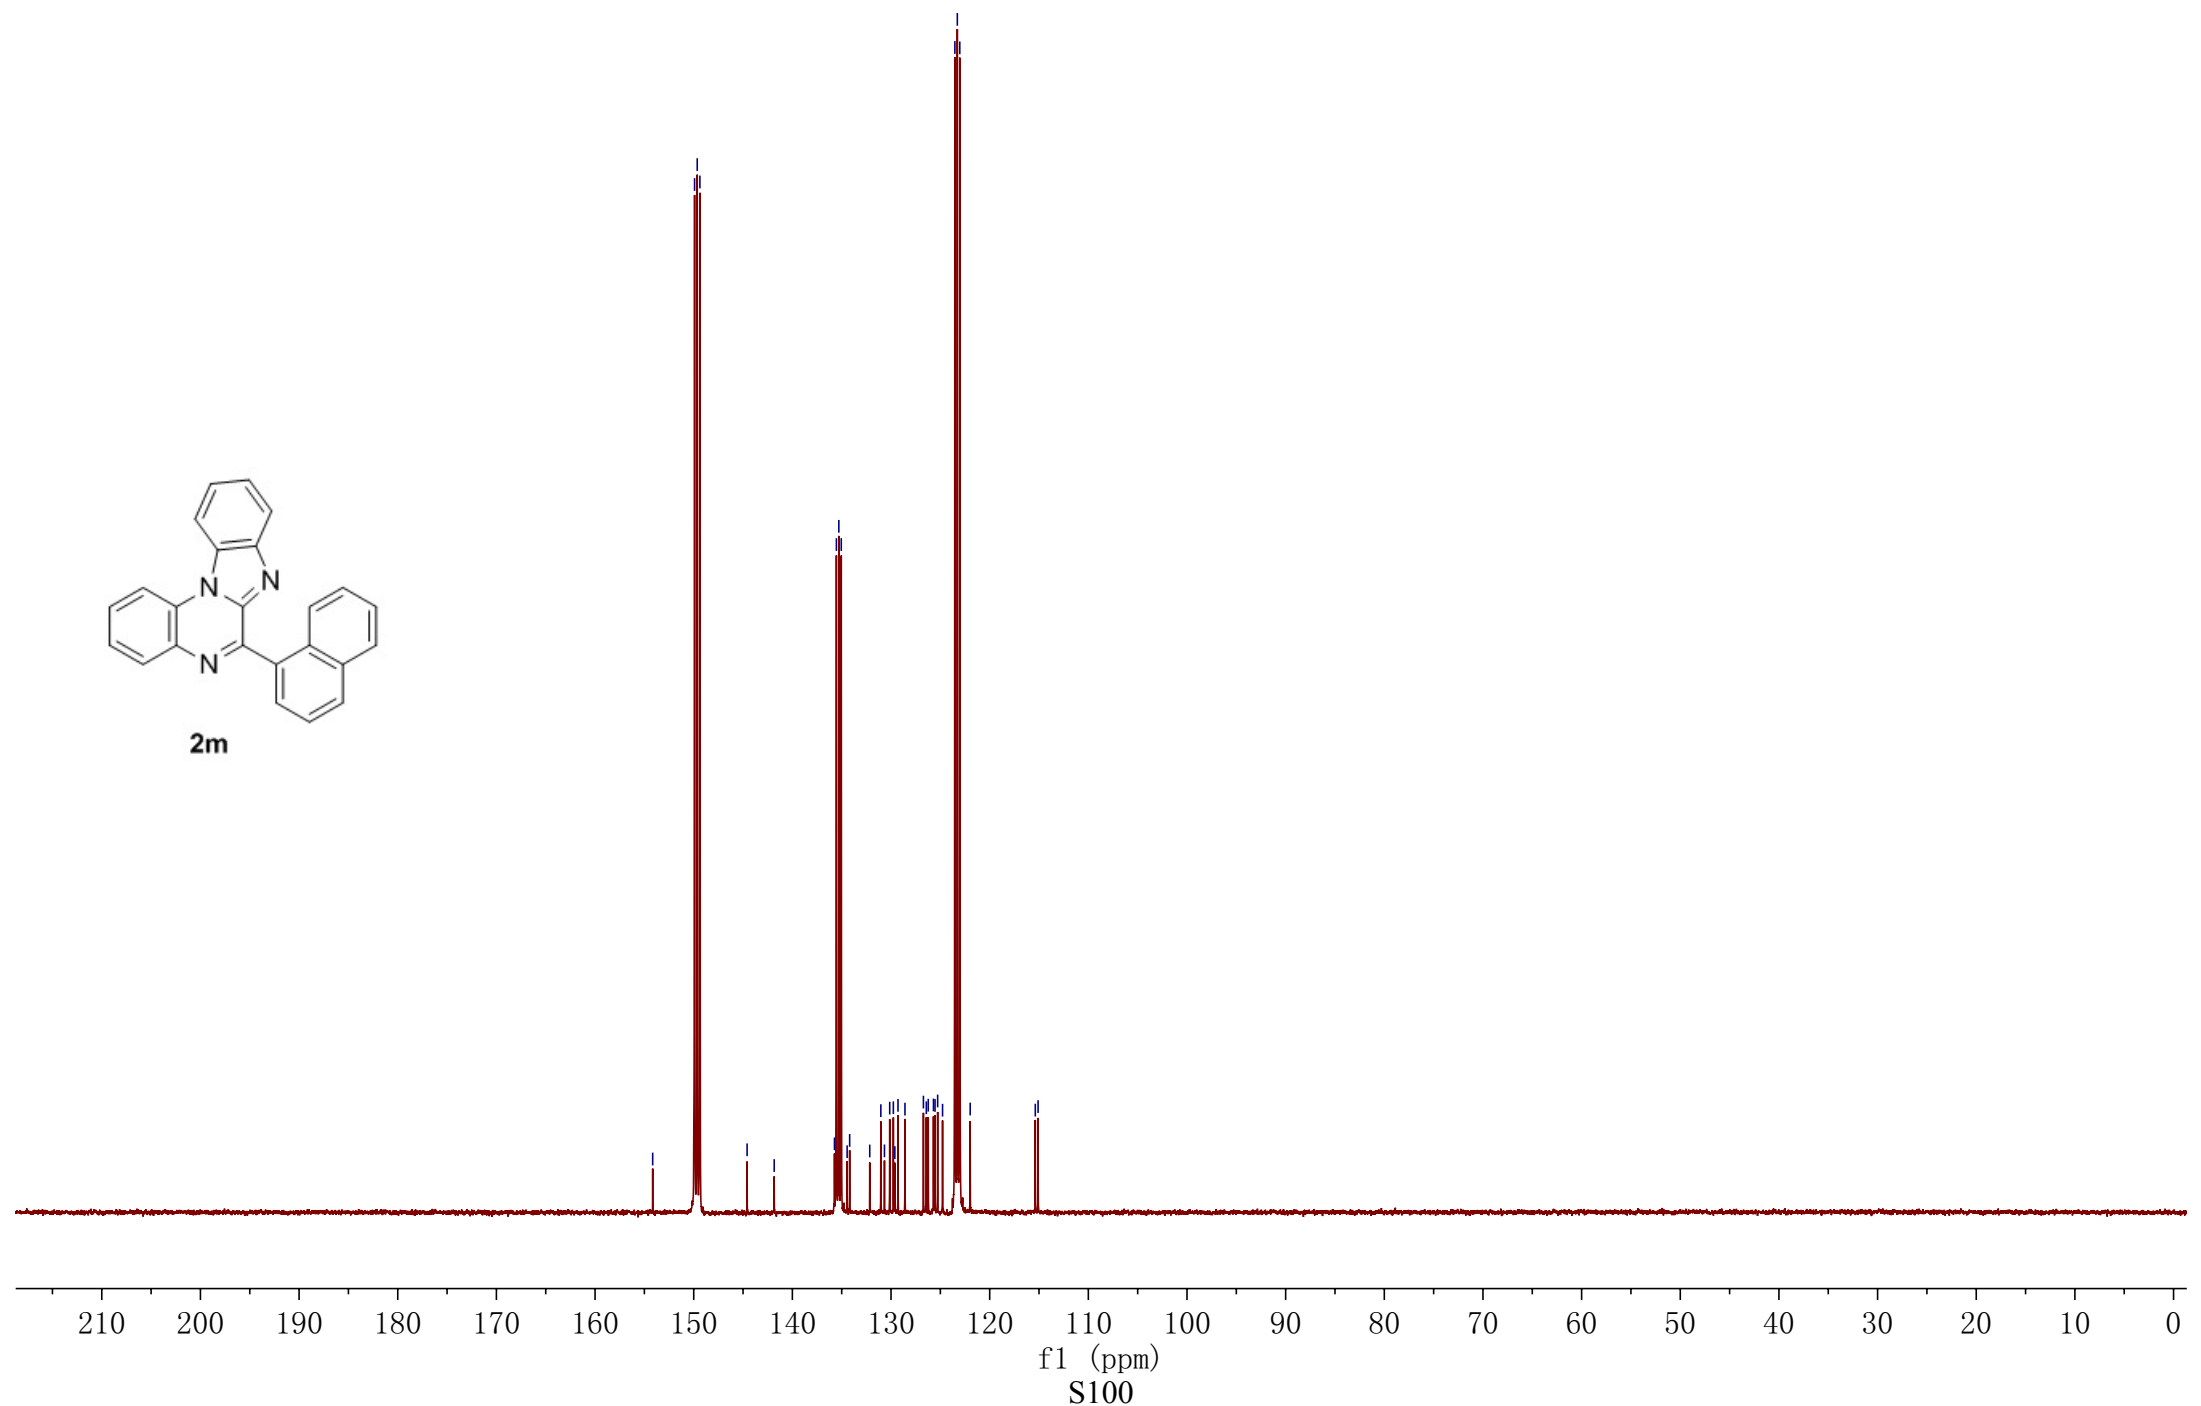



9.474  
9.472  
9.465  
9.463

8.703  
8.544  
8.525  
8.506  
8.209

7.825  
7.823  
7.812  
7.810  
7.650  
7.633  
7.629  
7.613  
7.544  
7.523  
7.354  
7.344  
7.341  
7.332  
7.189  
5.045

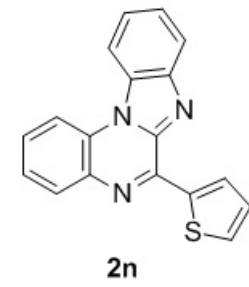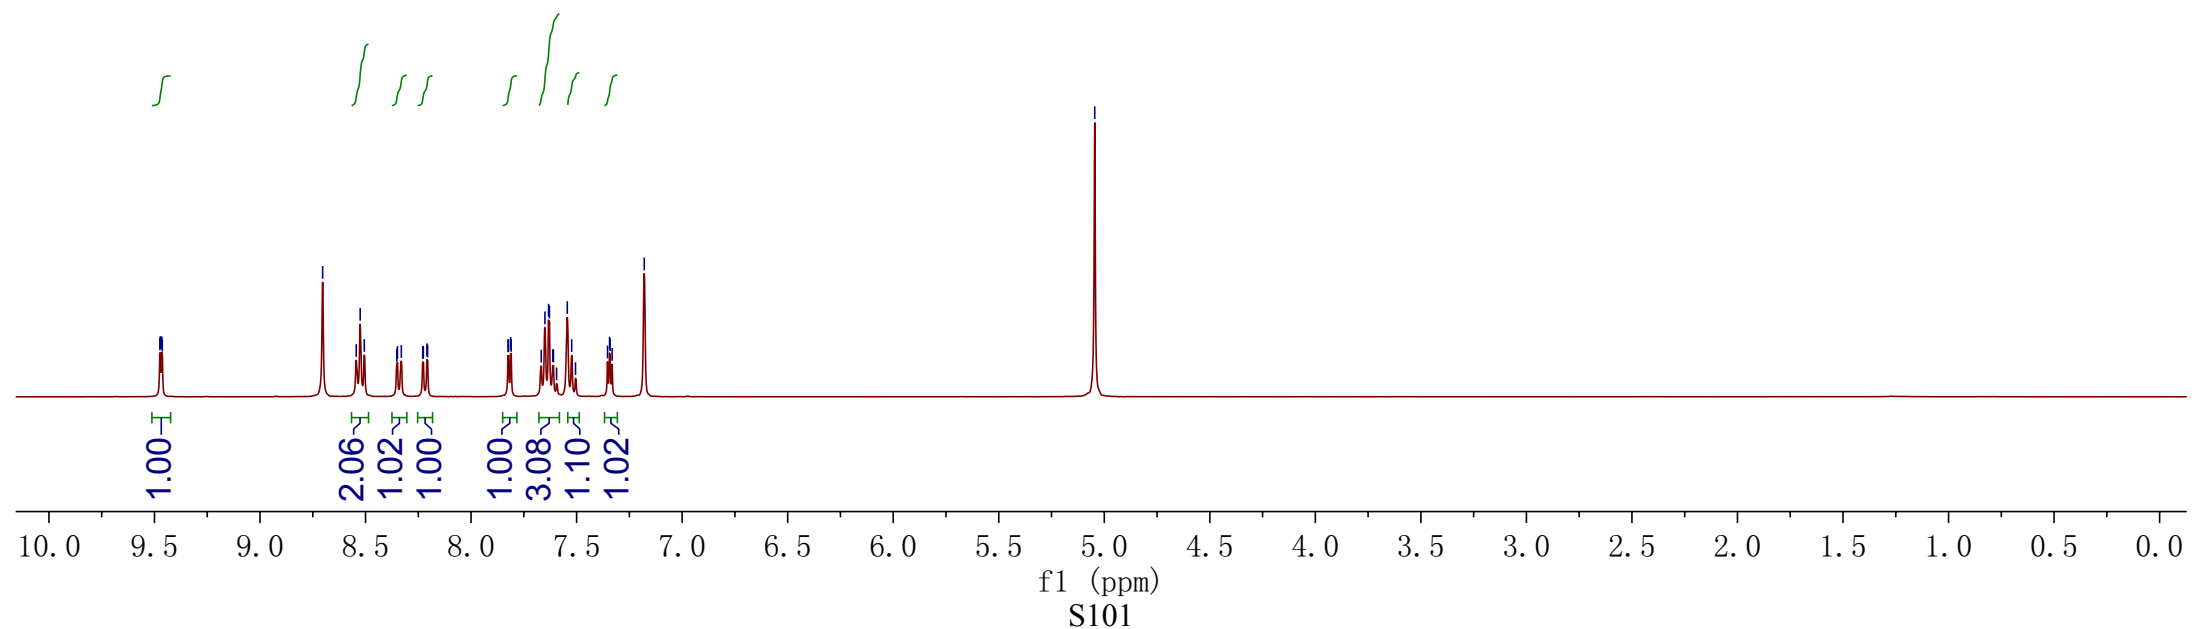

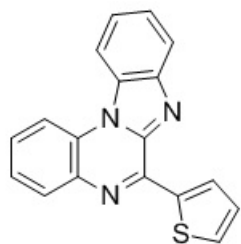

2n

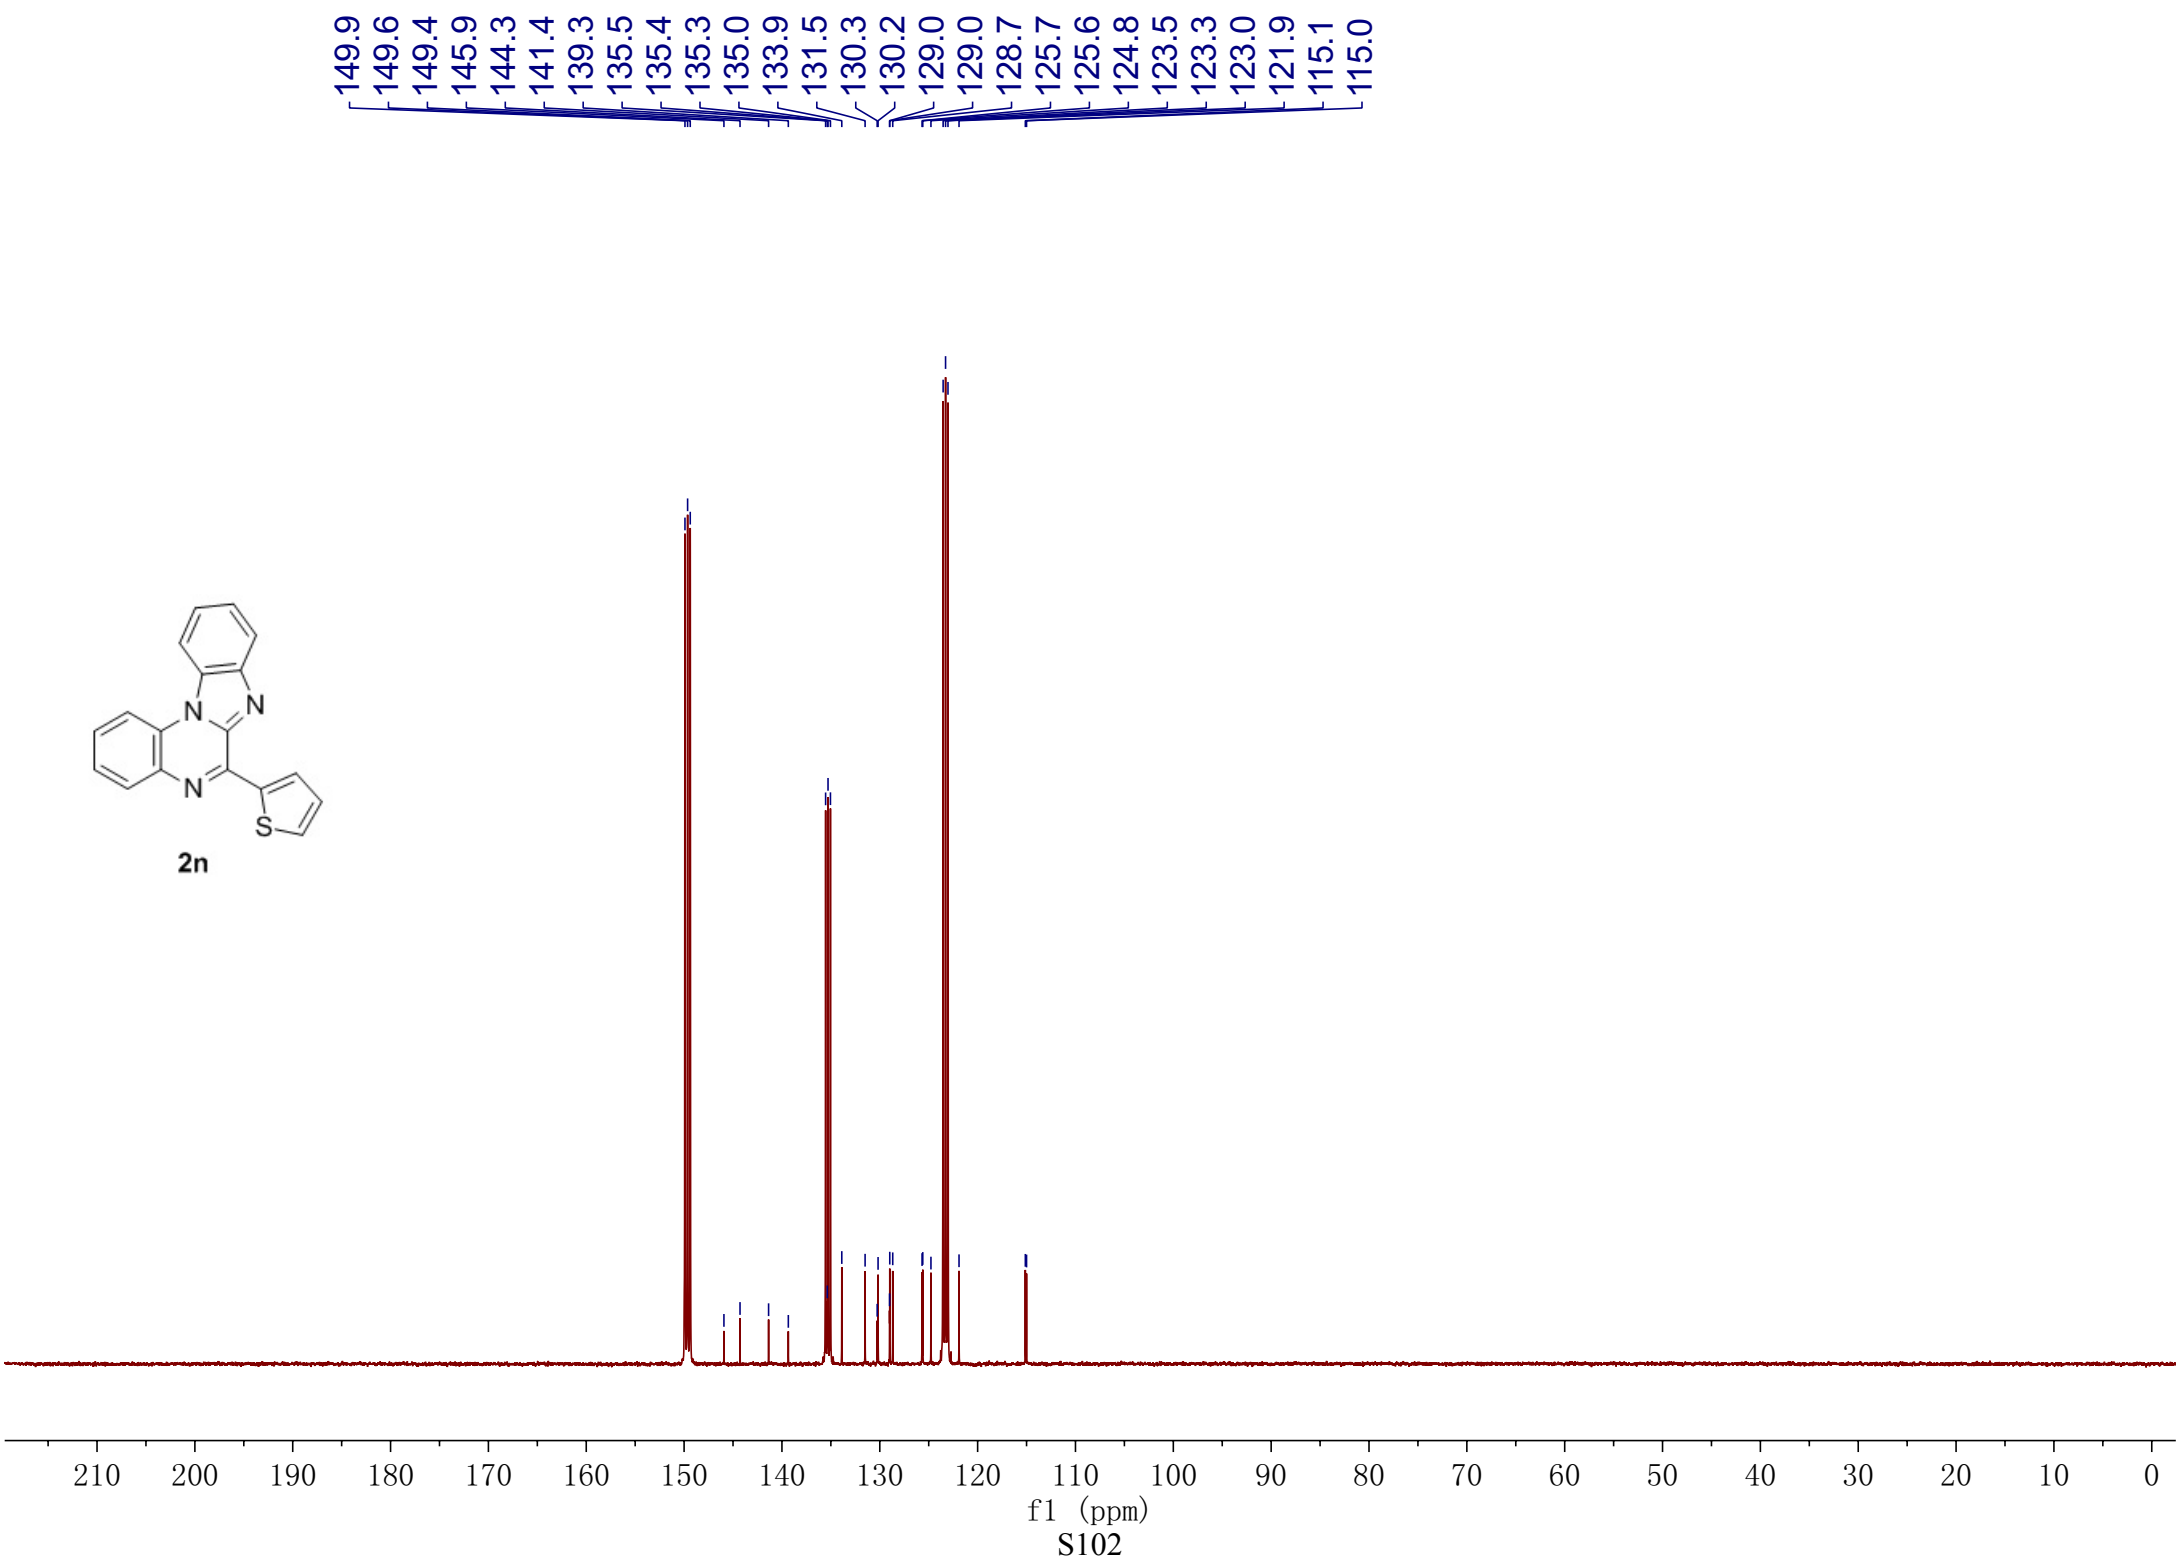

9.118  
8.215  
8.194  
8.156  
8.135  
8.044  
8.024  
7.995  
7.977  
7.635  
7.617  
7.596  
7.520  
7.503  
7.488  
7.470  
7.451  
7.295

0.000

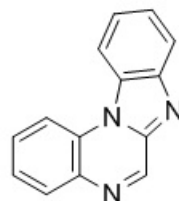

2o

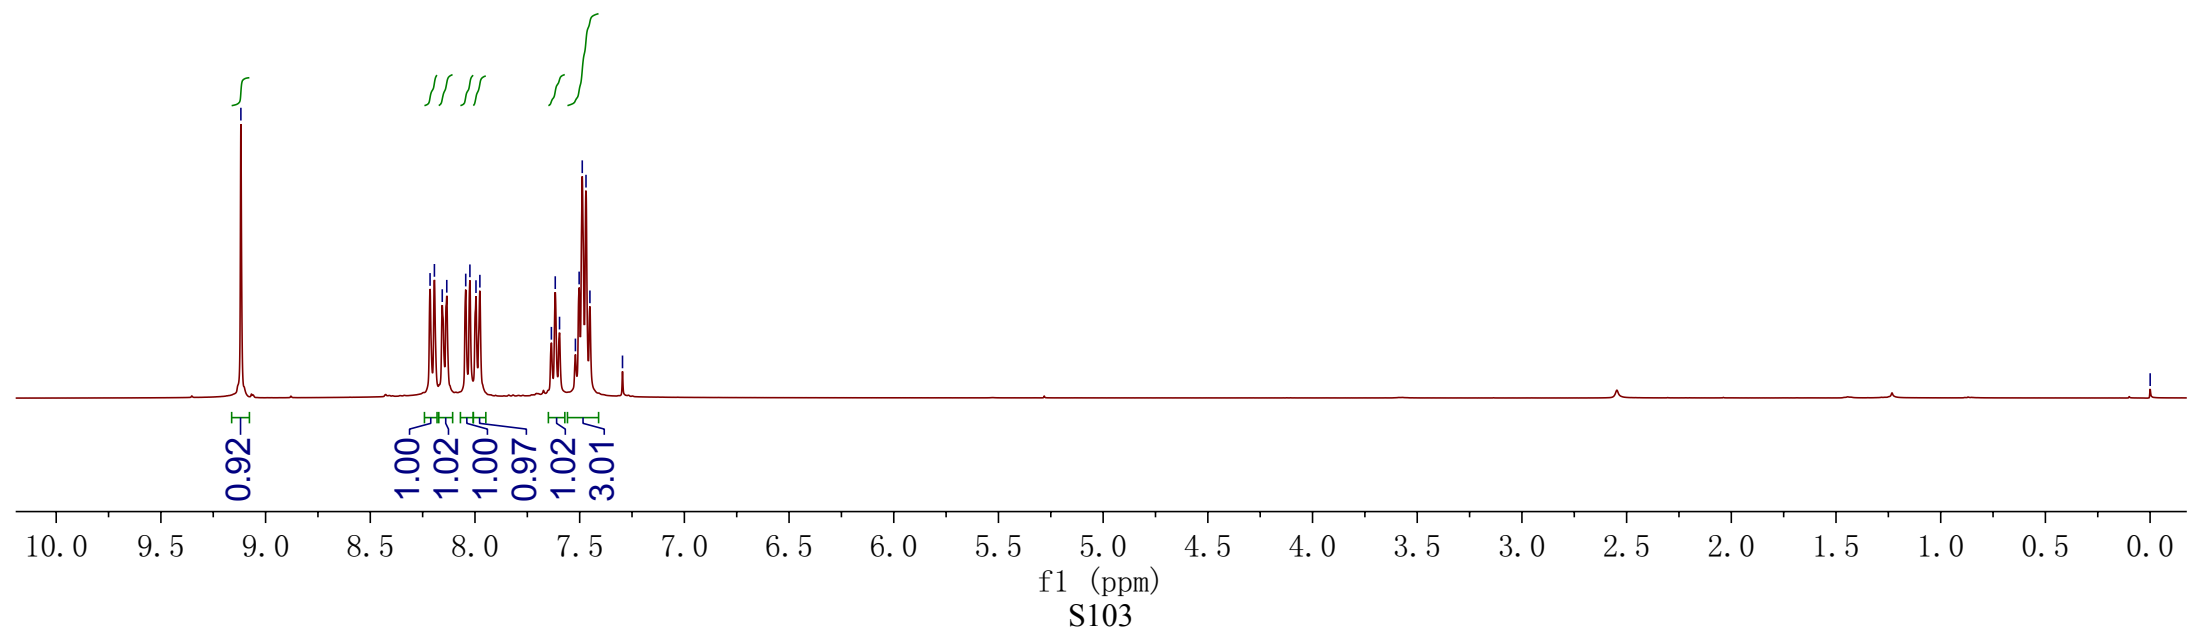

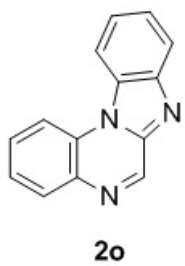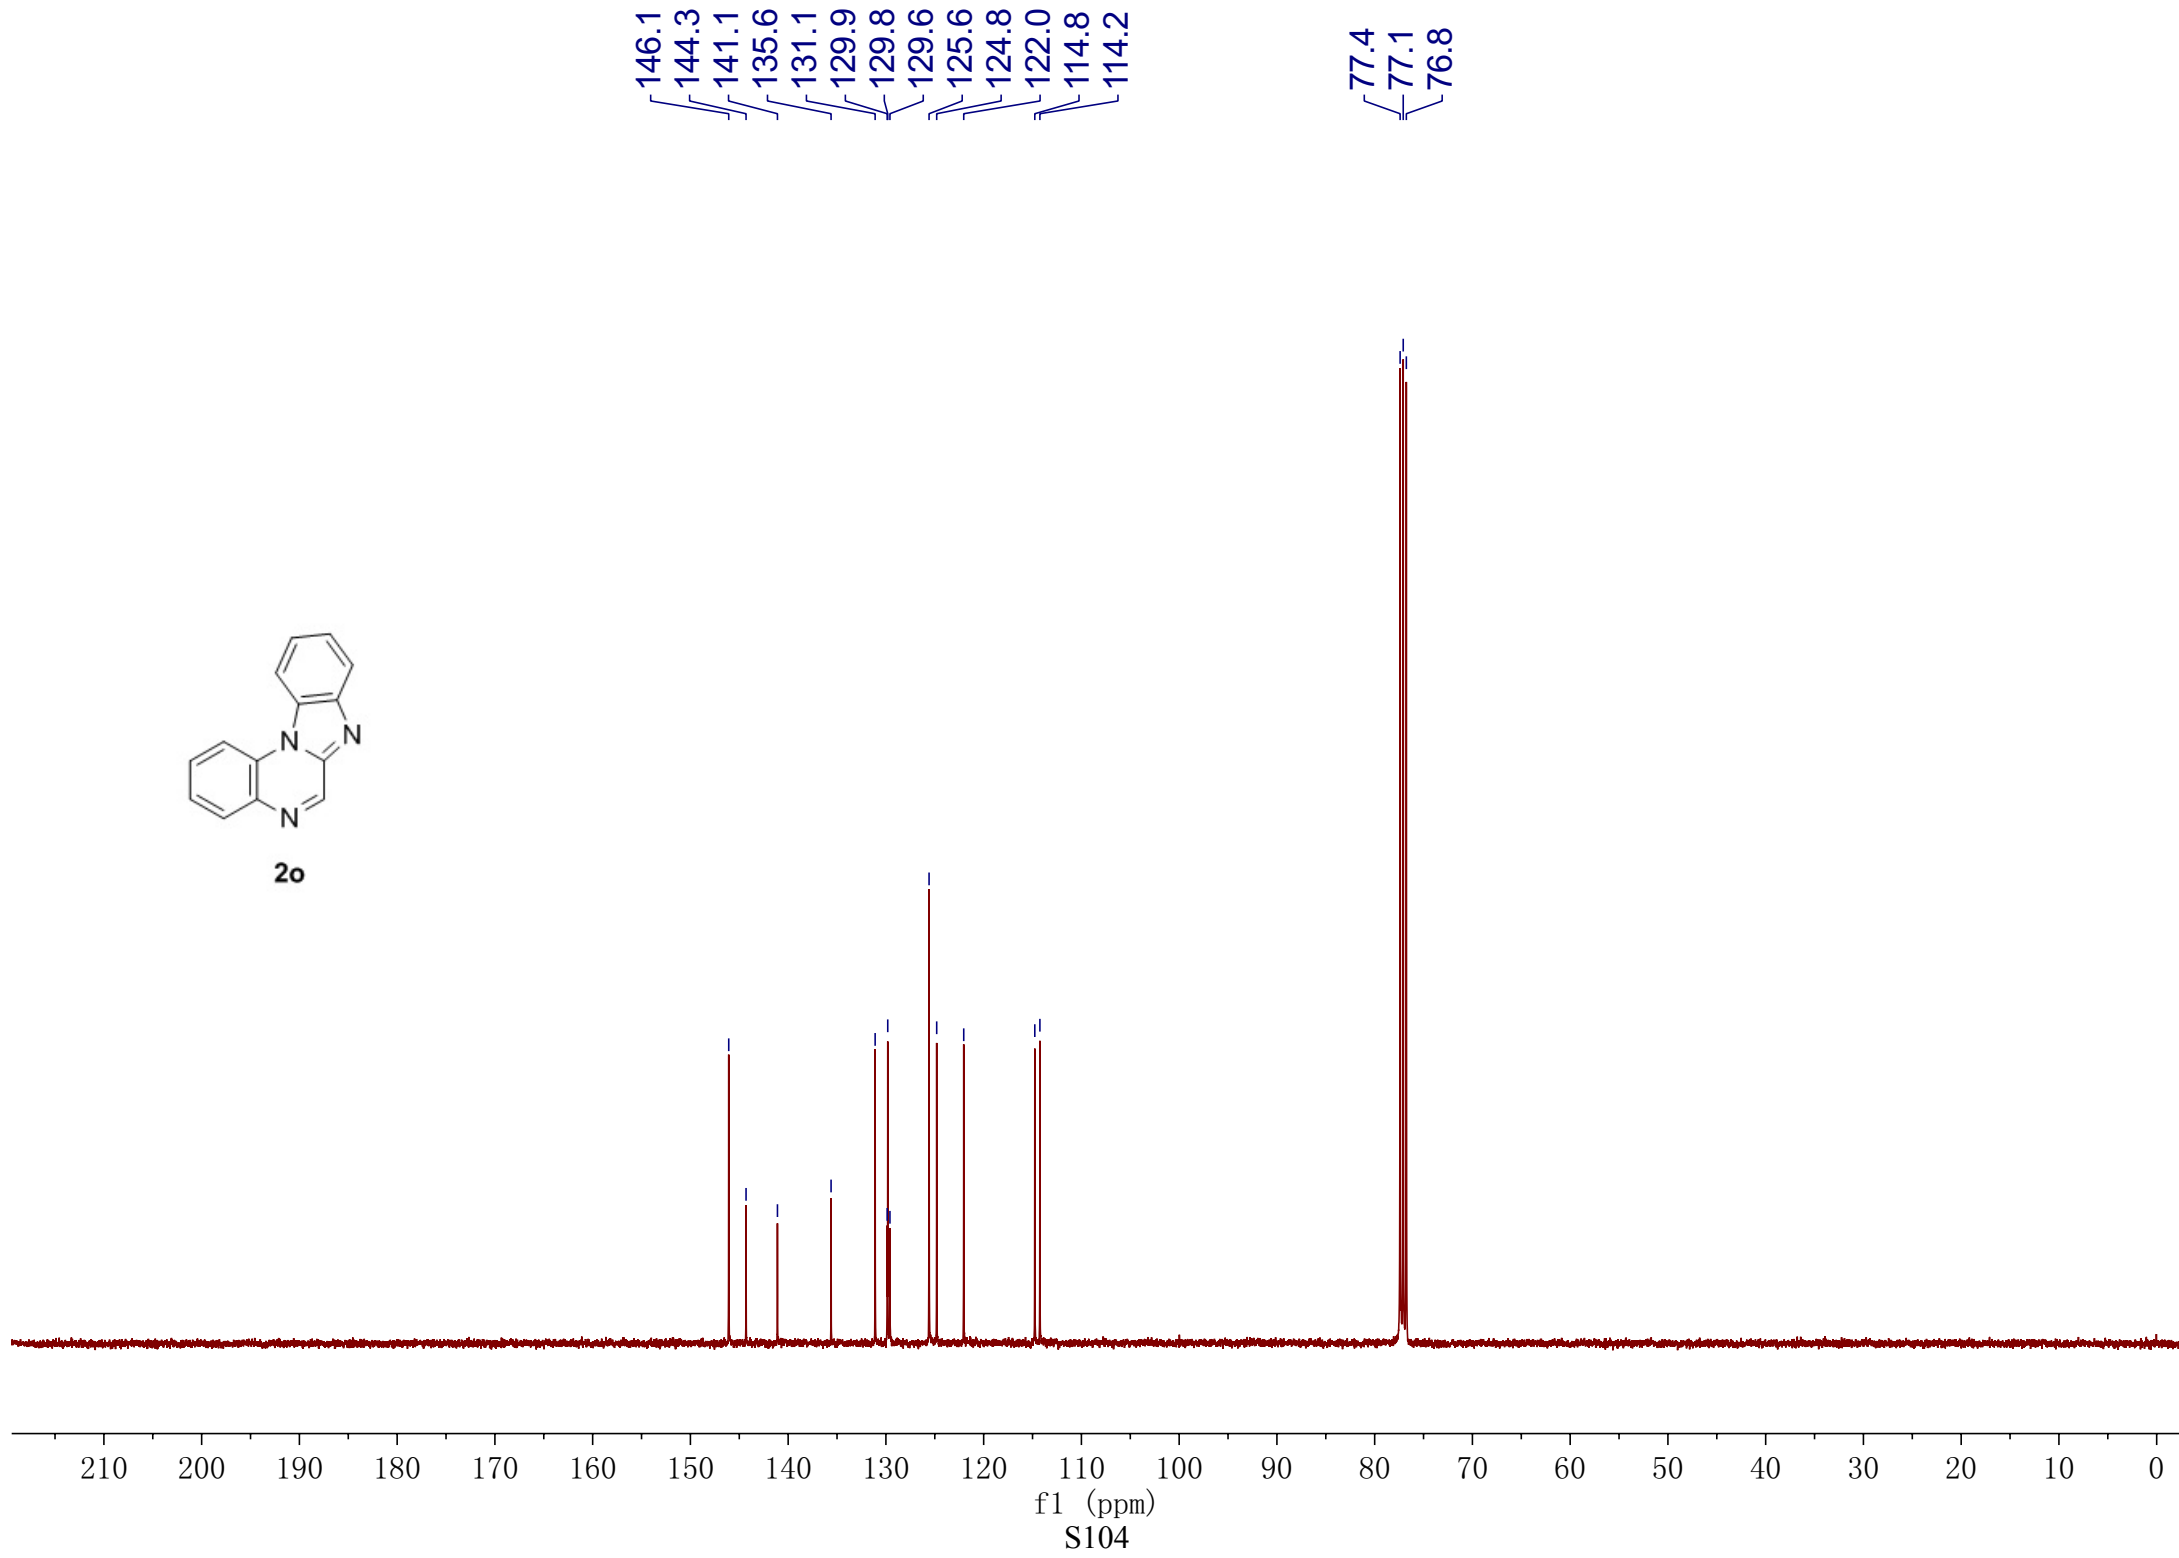

8.463  
8.443  
8.399  
8.391  
8.382  
8.377  
8.153  
8.148  
8.139  
8.131  
8.111  
8.108  
8.091  
8.088  
7.729  
7.726  
7.708  
7.690  
7.687  
7.639  
7.625  
7.621  
7.618  
7.609  
7.601  
7.598  
7.594  
7.580  
7.563  
7.560  
7.266

3.073

0.000

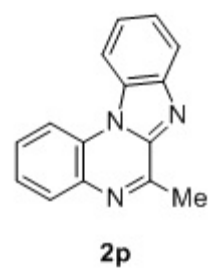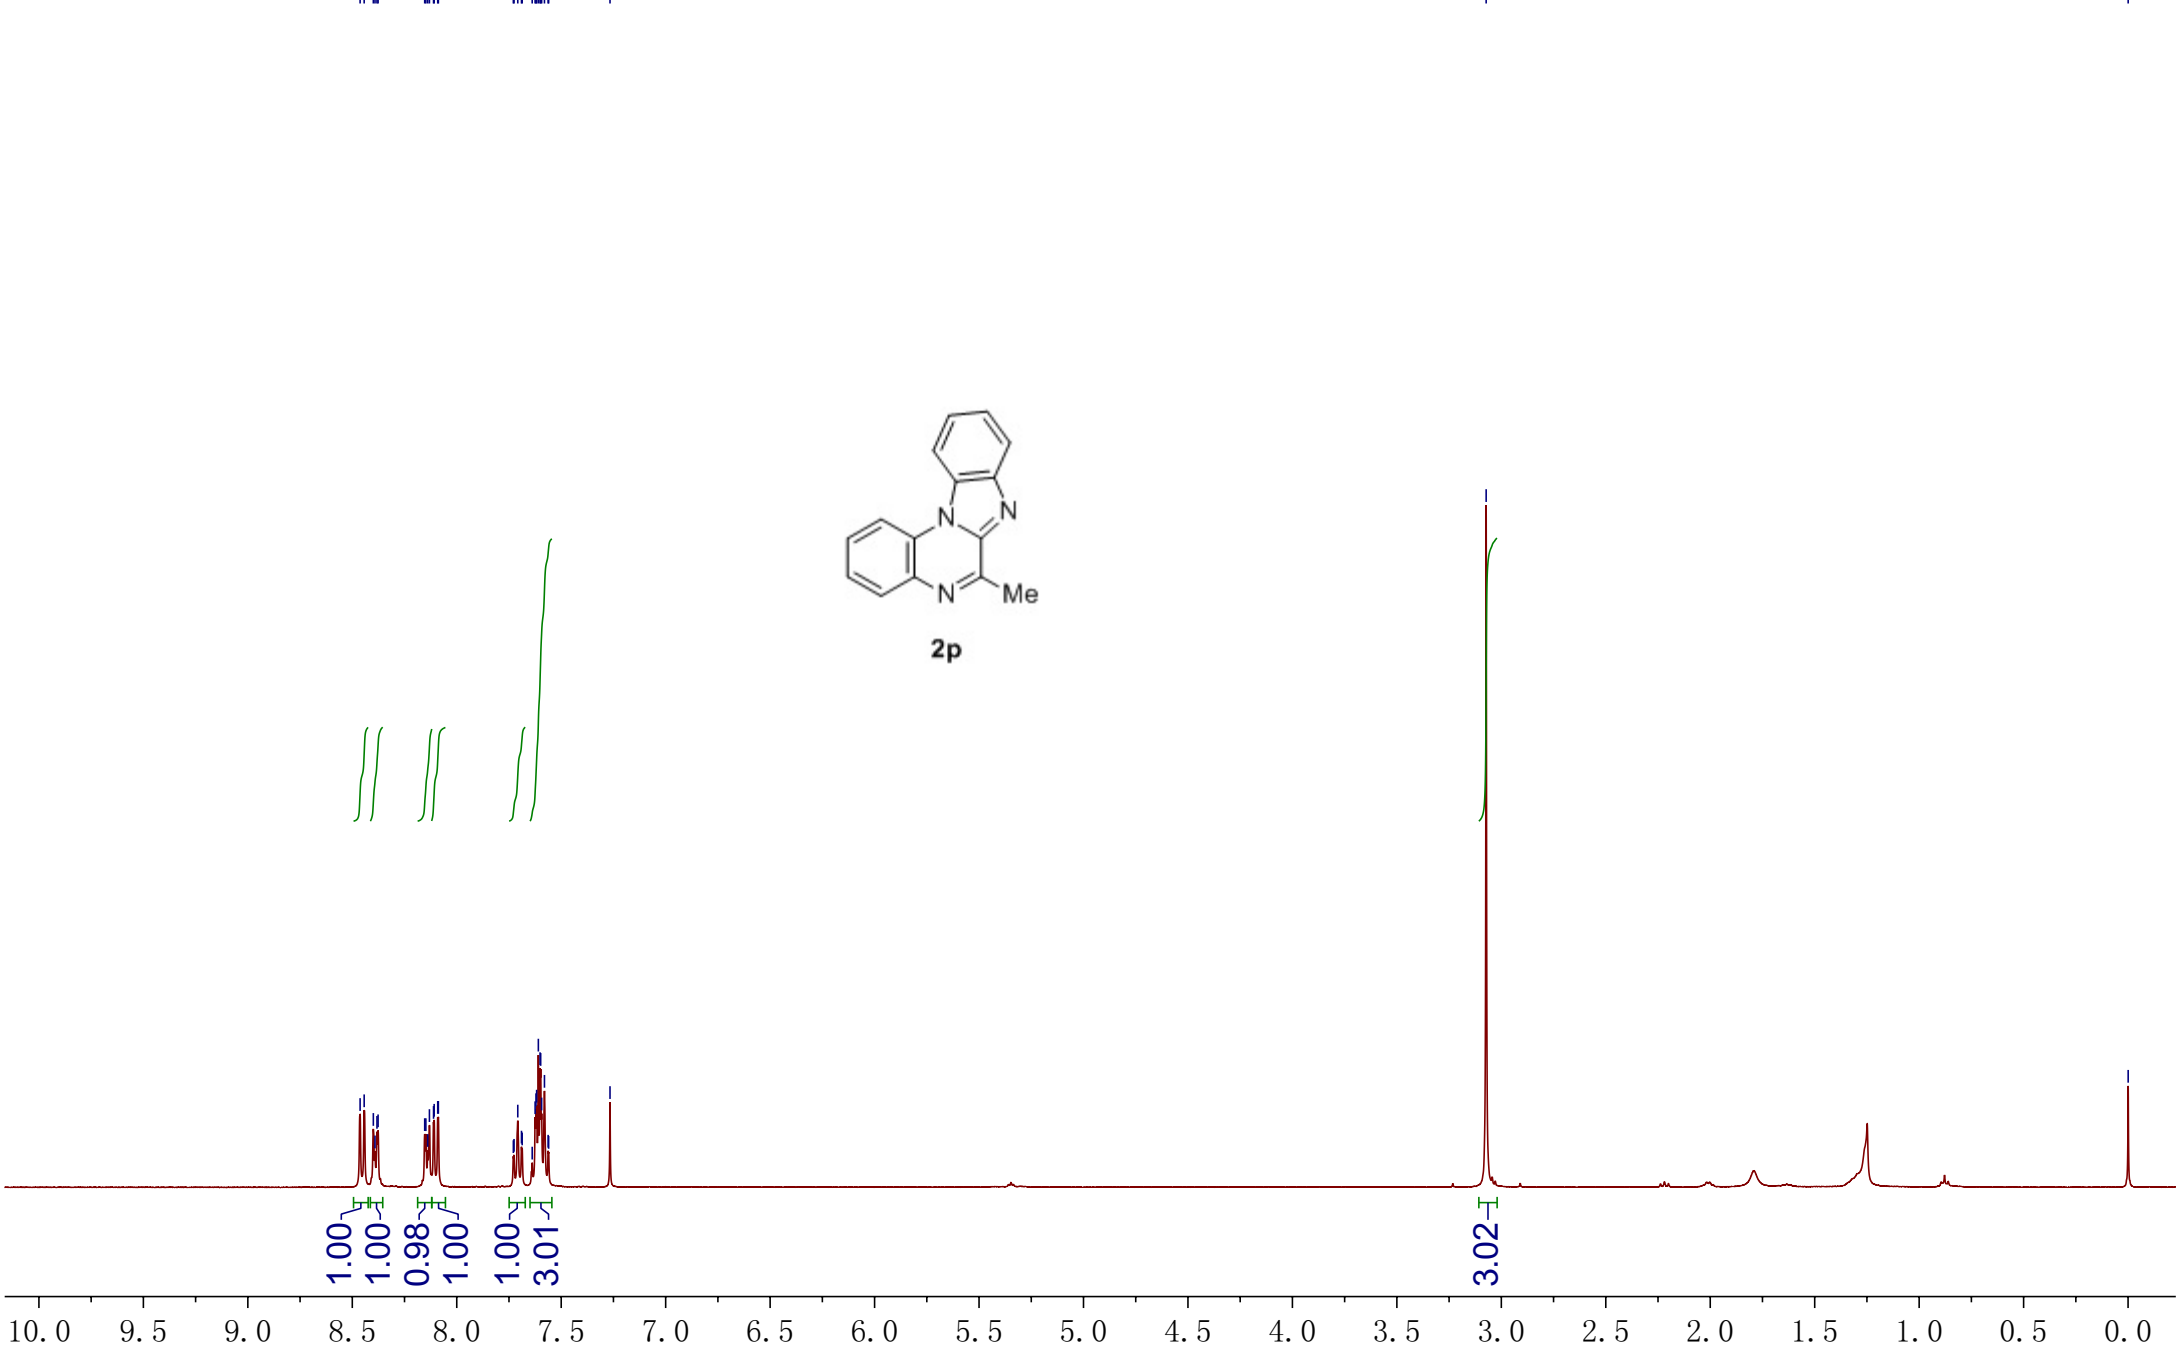

10.0 9.5 9.0 8.5 8.0 7.5 7.0 6.5 6.0 5.5 5.0 4.5 4.0 3.5 3.0 2.5 2.0 1.5 1.0 0.5 0.0

f1 (ppm)  
S105

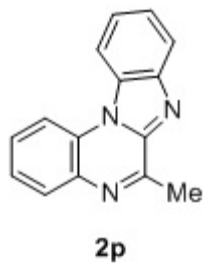

— 154.6  
143.9  
141.4  
135.3  
130.5  
130.2  
129.4  
128.7  
125.6  
125.5  
124.7  
122.0  
114.6  
114.3

77.4  
77.0  
76.7

— 21.8

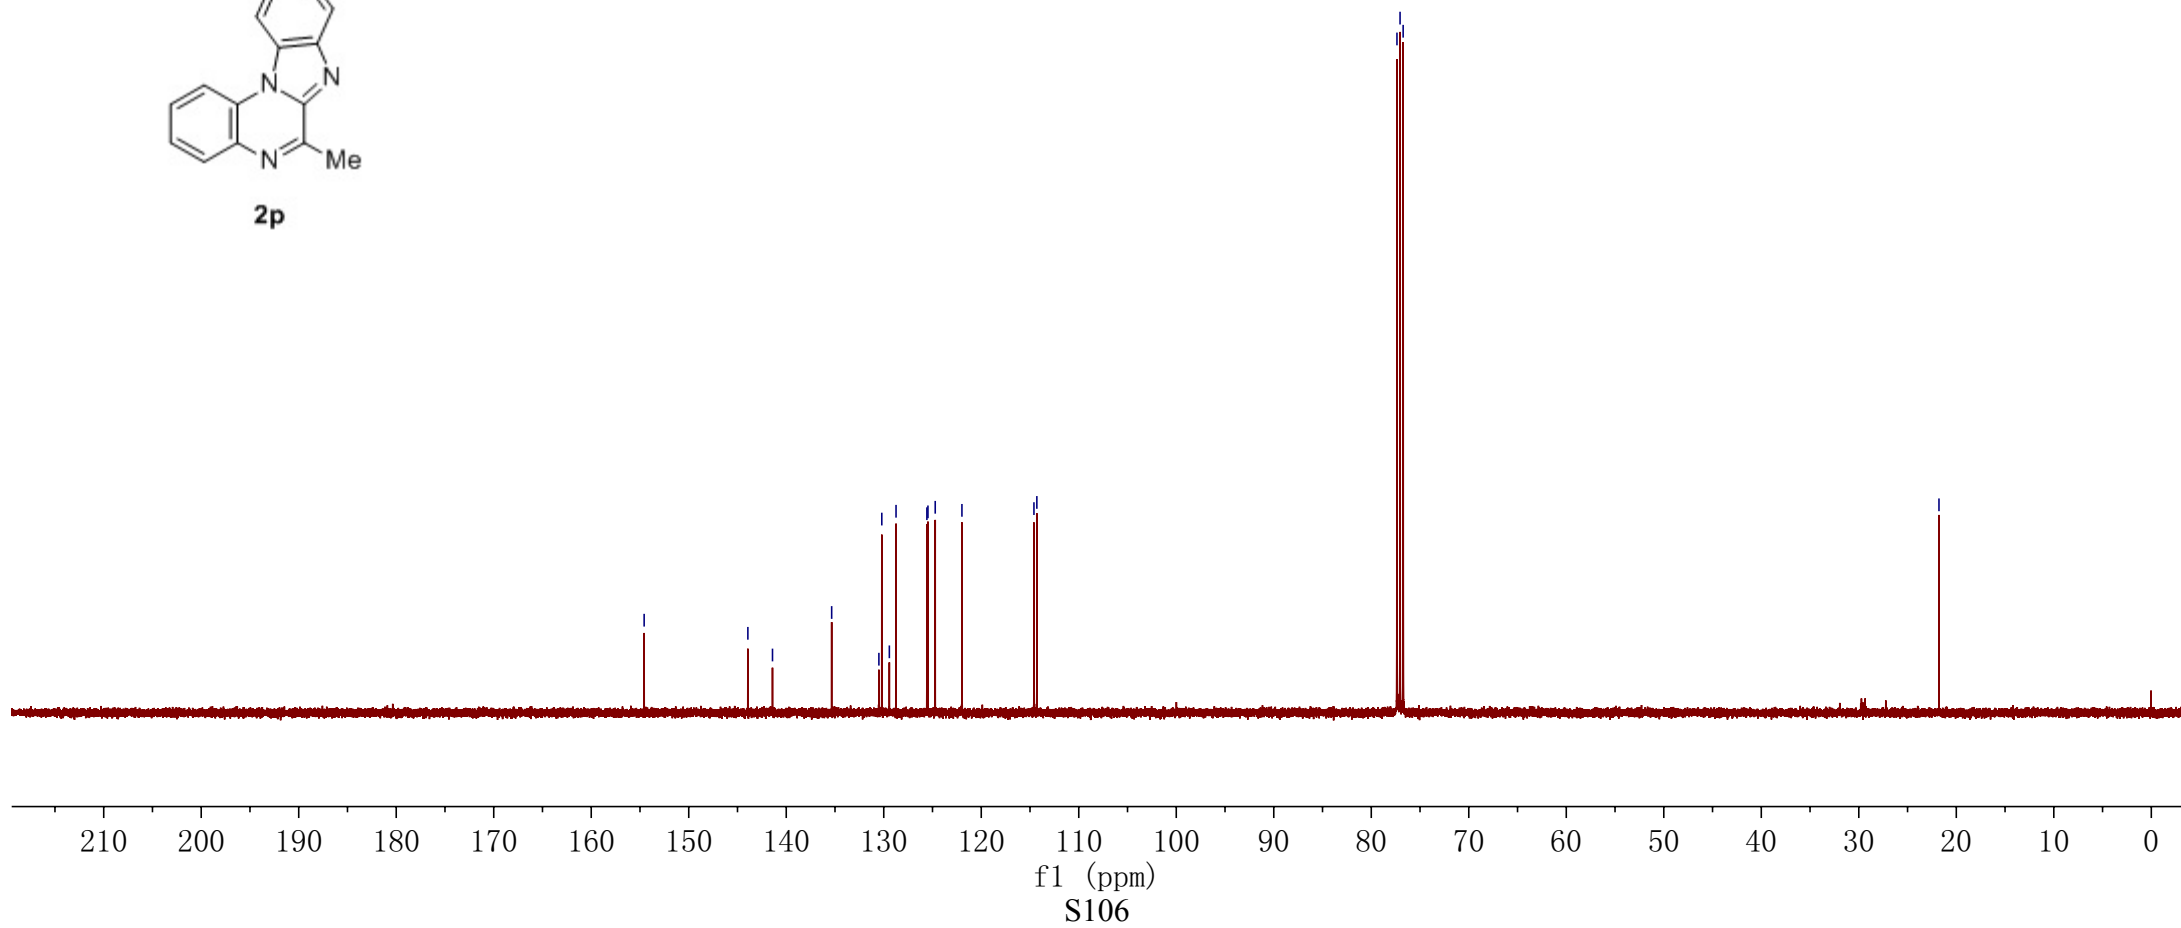

8.453  
8.451  
8.433  
8.430  
8.414  
8.408  
8.396  
8.392  
8.173  
8.171  
8.167  
8.156  
8.151  
8.149  
8.022  
8.018  
8.002  
7.998  
7.665  
7.661  
7.647  
7.643  
7.641  
7.637  
7.626  
7.623  
7.619  
7.612  
7.605  
7.600  
7.592  
7.588  
7.552  
7.549  
7.532  
7.530  
7.514  
7.262  
3.264  
3.252  
3.240  
3.231  
1.507  
1.500  
1.495  
1.488  
1.479  
1.300  
1.292  
1.284  
1.280  
1.271  
1.263  
1.254  
0.000

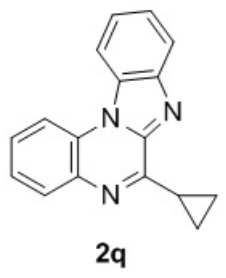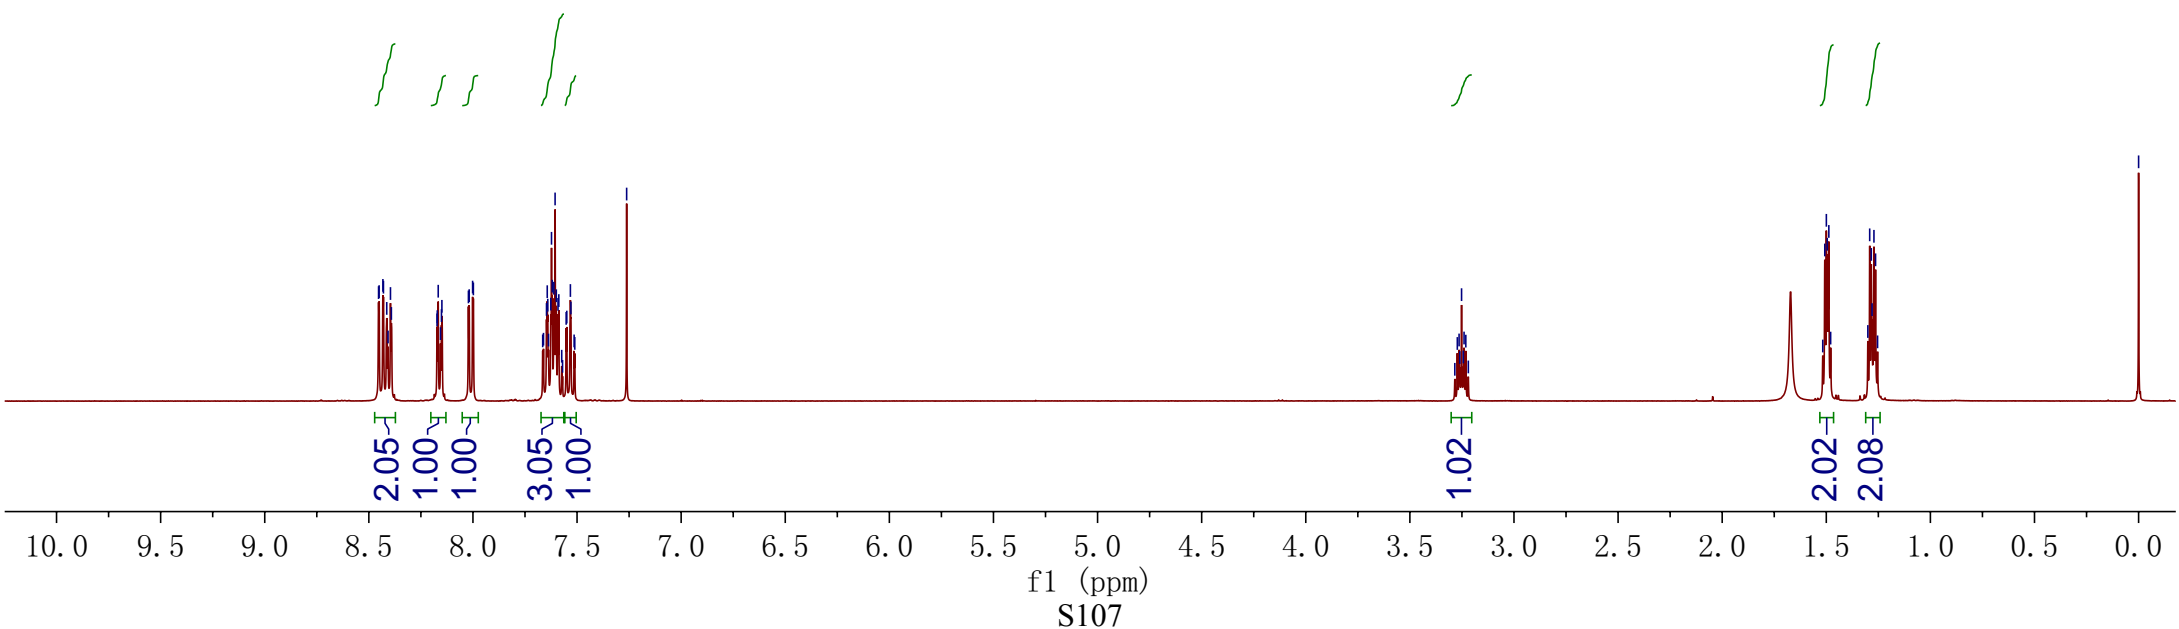

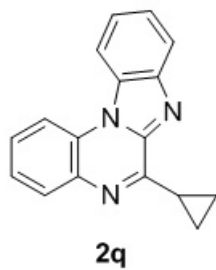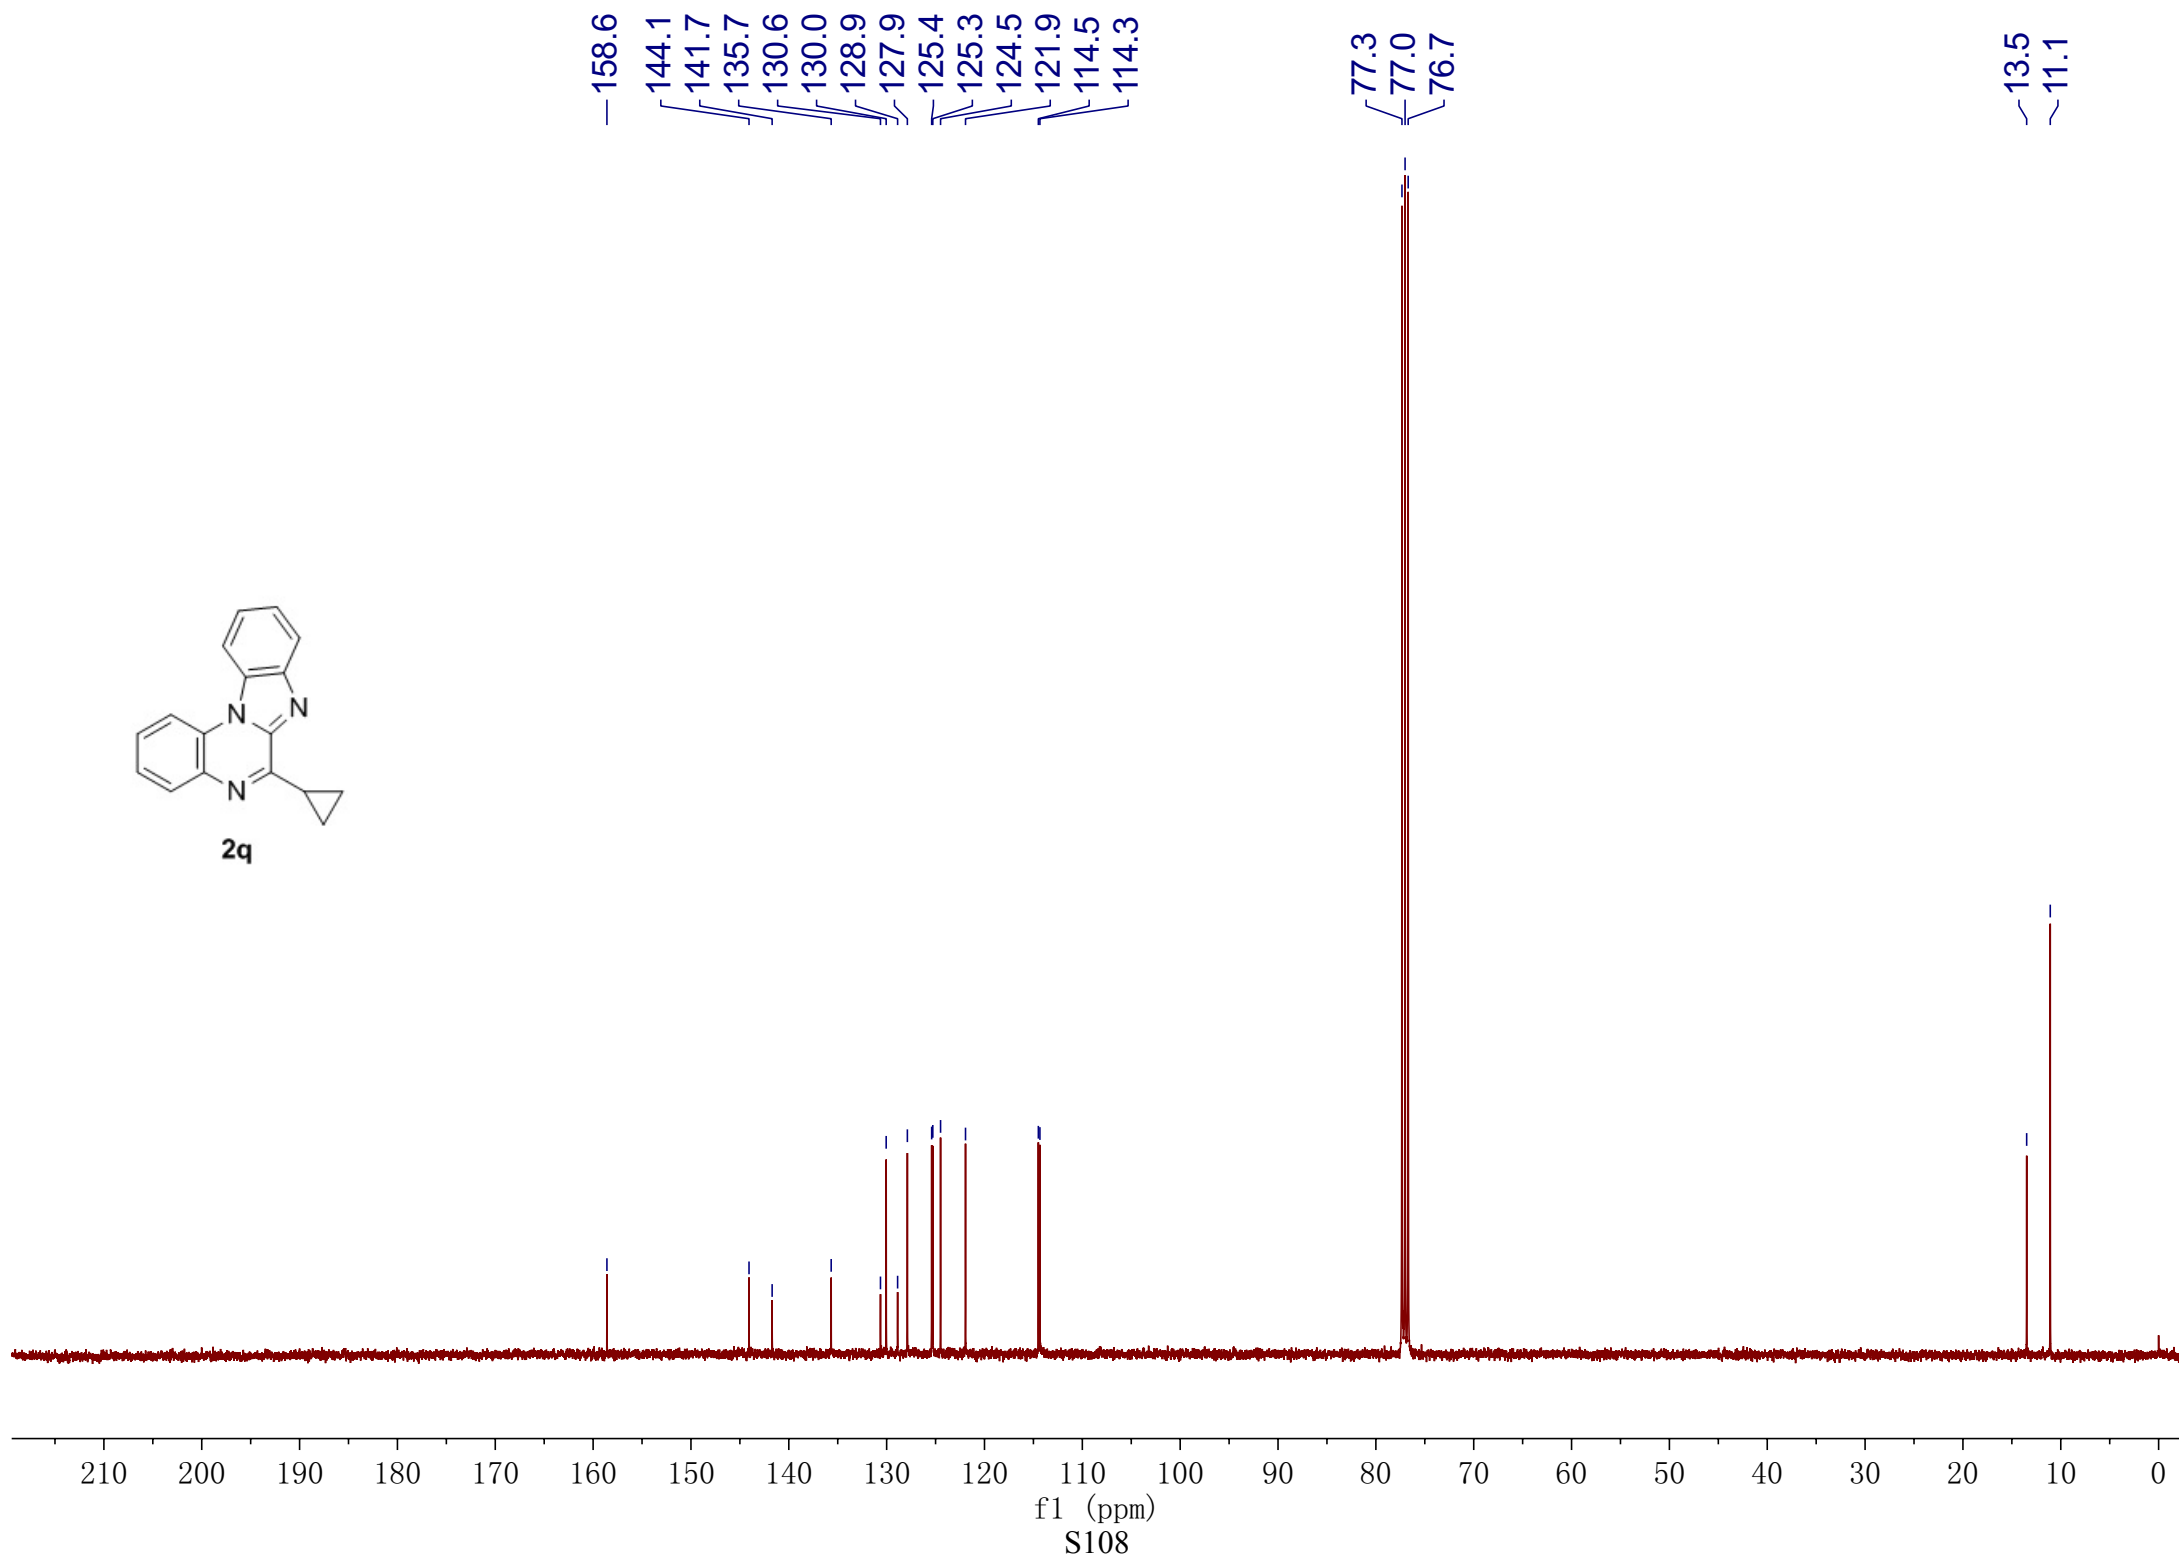



8.843  
8.840  
8.823  
8.304  
8.147  
8.127  
8.123  
7.618  
7.602  
7.583  
7.578  
7.573  
7.569  
7.556  
7.548  
7.546  
7.540  
7.538  
7.519  
7.500  
7.480  
7.460  
7.353  
7.335  
7.243

-2.837

-0.000

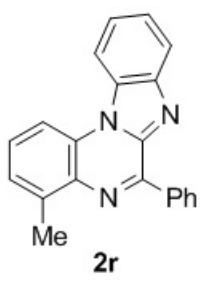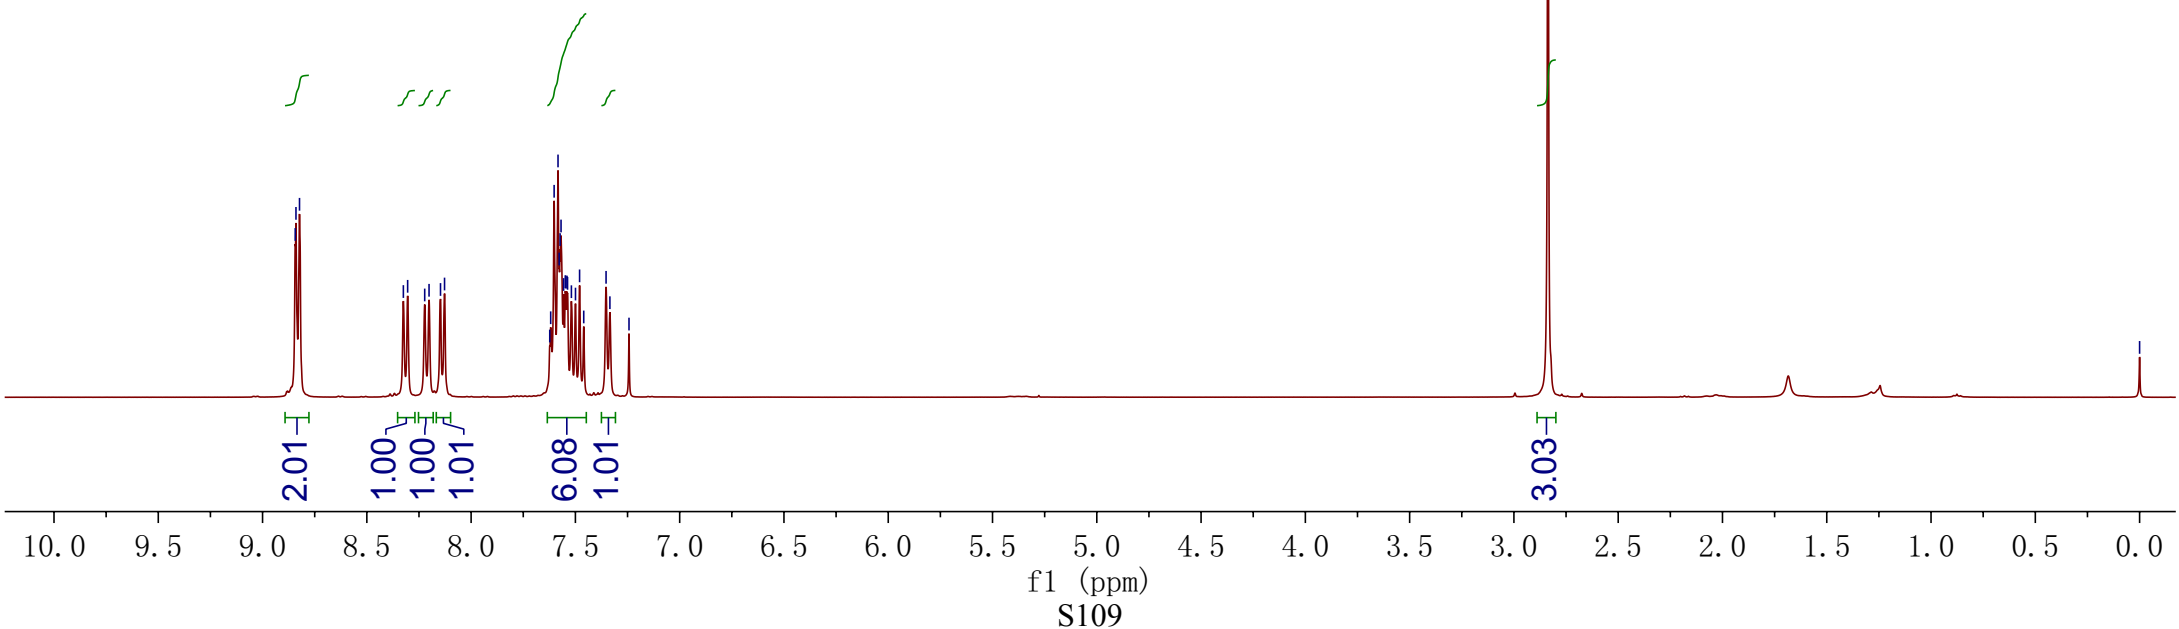

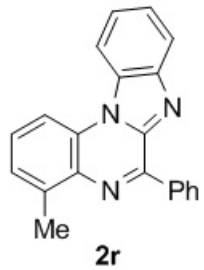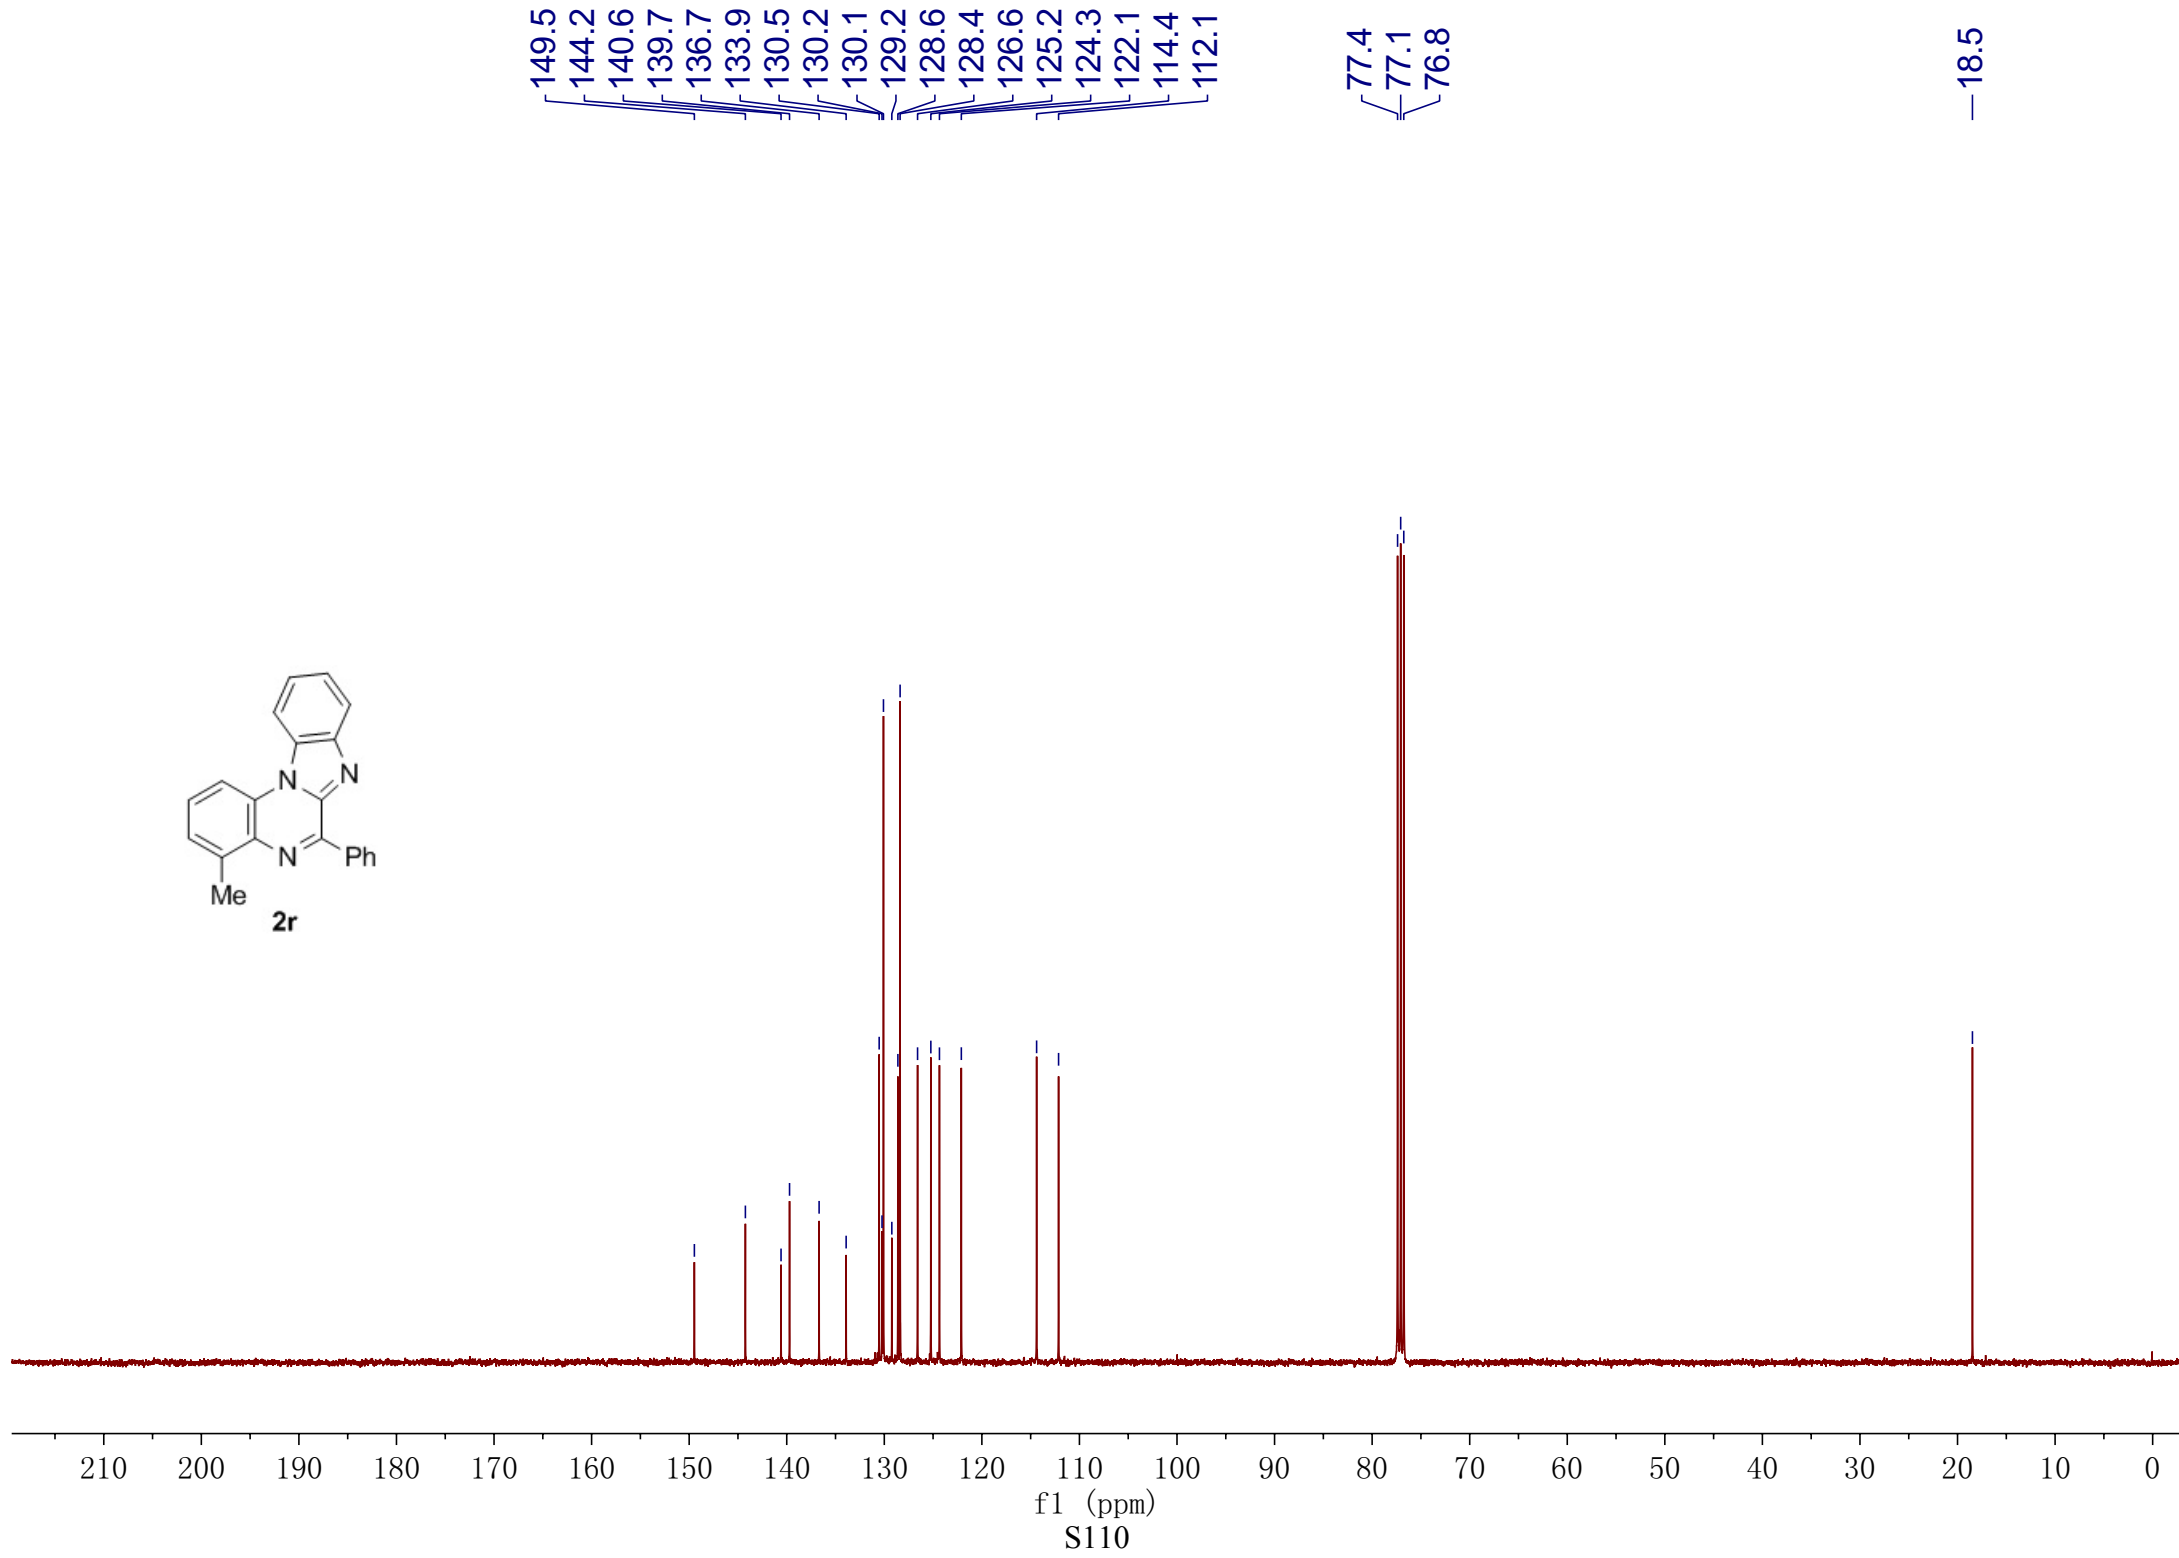

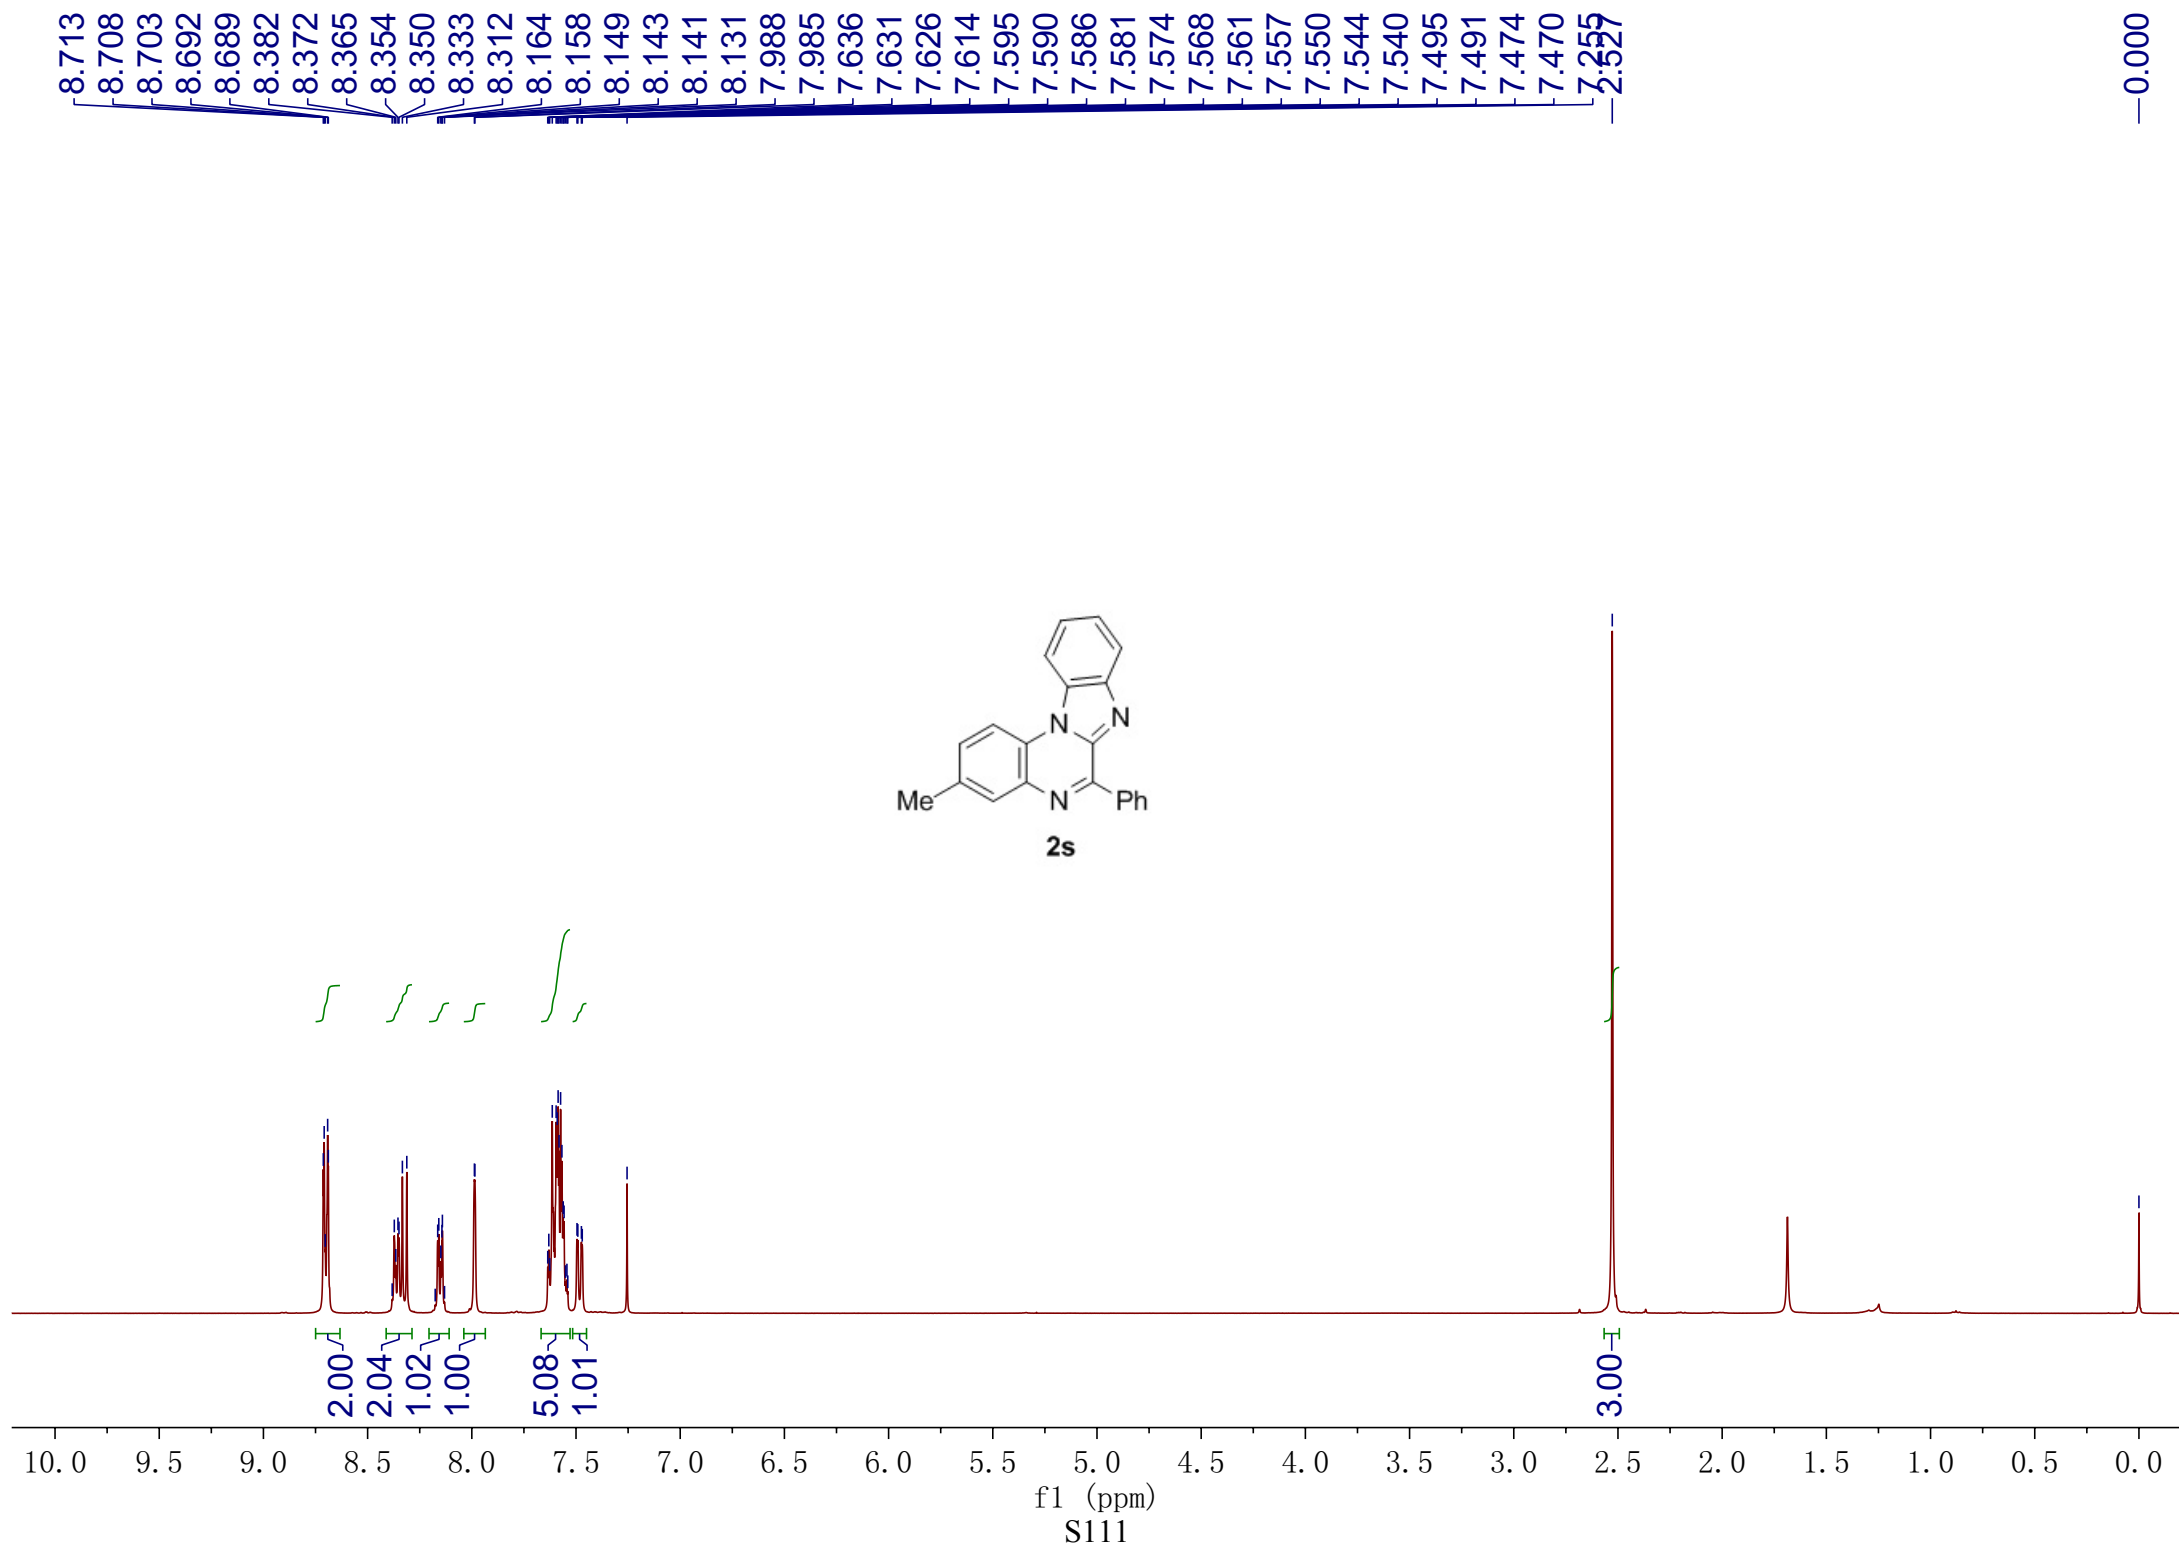

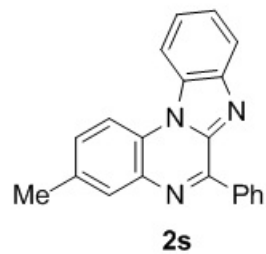

151.9  
144.2  
140.7  
136.4  
135.6  
135.6  
130.9  
130.6  
130.3  
130.1  
129.9  
128.5  
127.1  
125.3  
124.5  
122.2  
114.2  
114.1

77.4  
77.1  
76.7

21.1

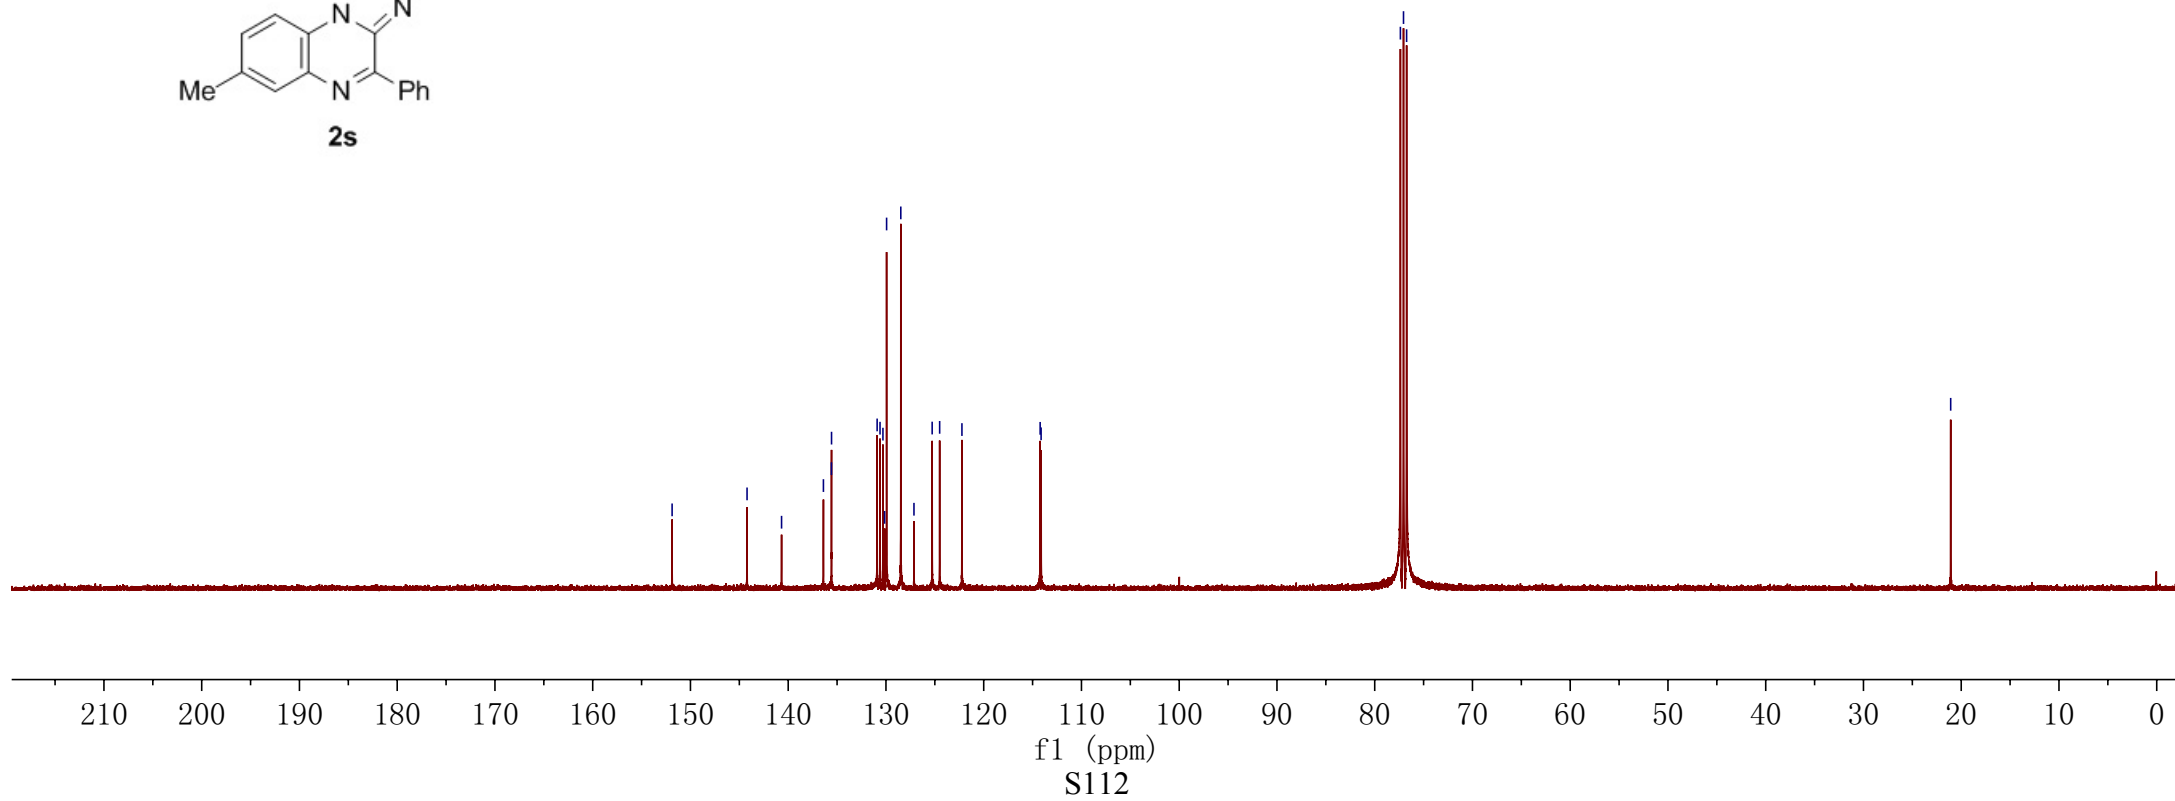

8.699  
8.695  
8.678  
8.323  
8.304  
8.138  
8.125  
8.120  
8.108  
8.103  
8.013  
7.993  
7.625  
7.621  
7.616  
7.604  
7.585  
7.576  
7.573  
7.569  
7.565  
7.555  
7.550  
7.547  
7.538  
7.533  
7.518  
7.501  
7.313  
7.292  
7.248

-2.571

-0.000

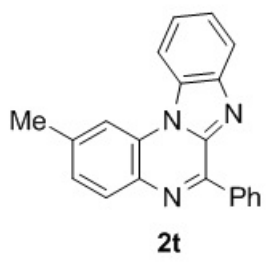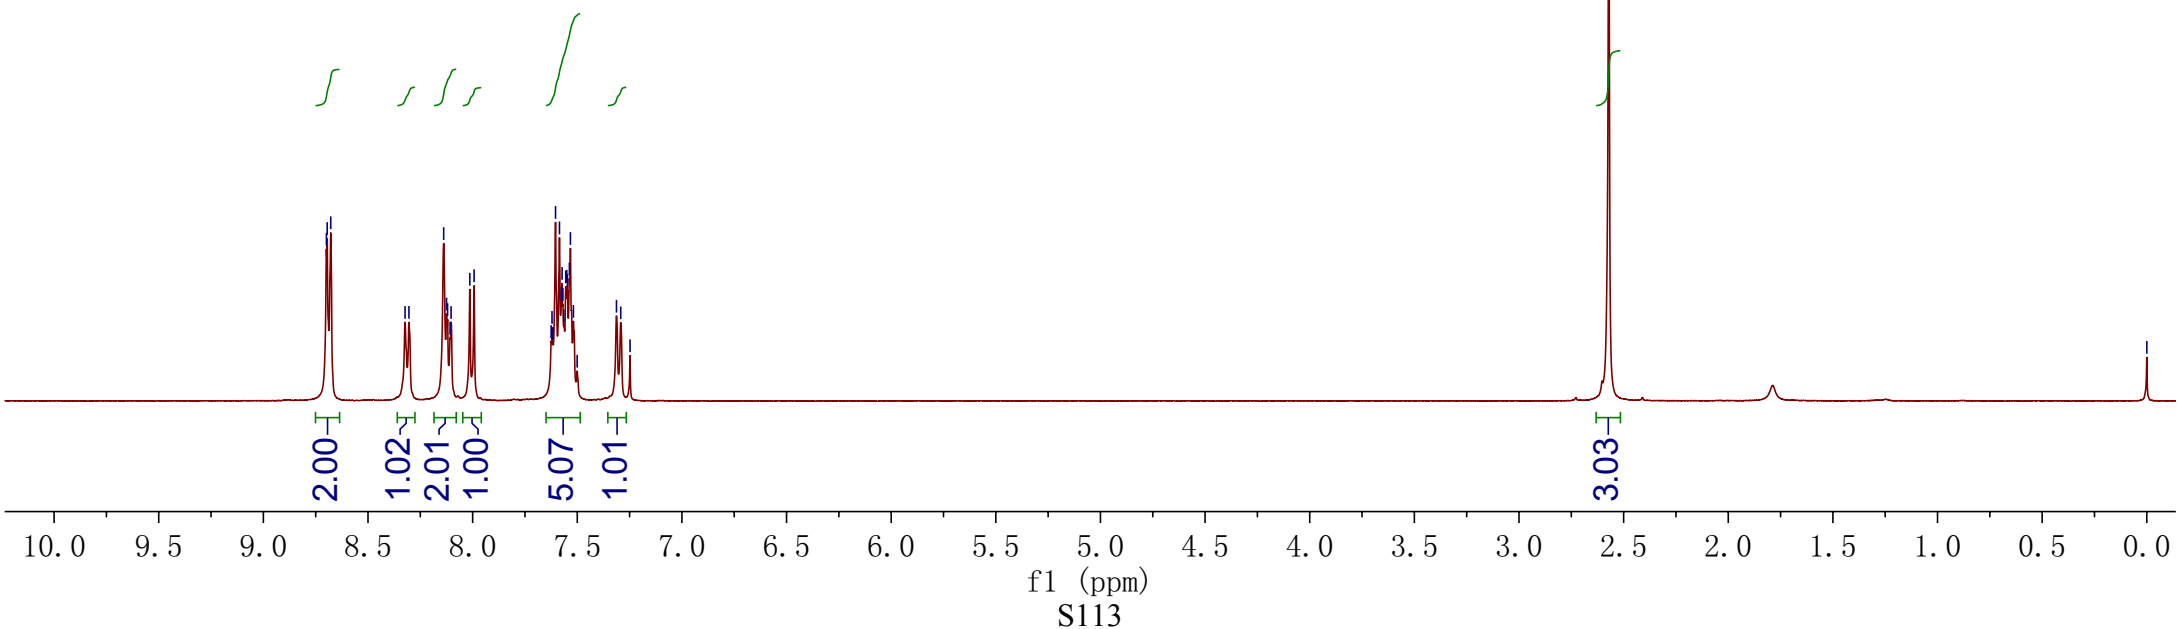

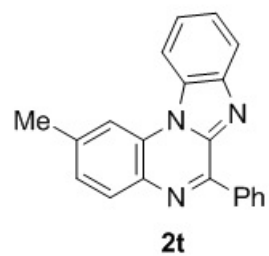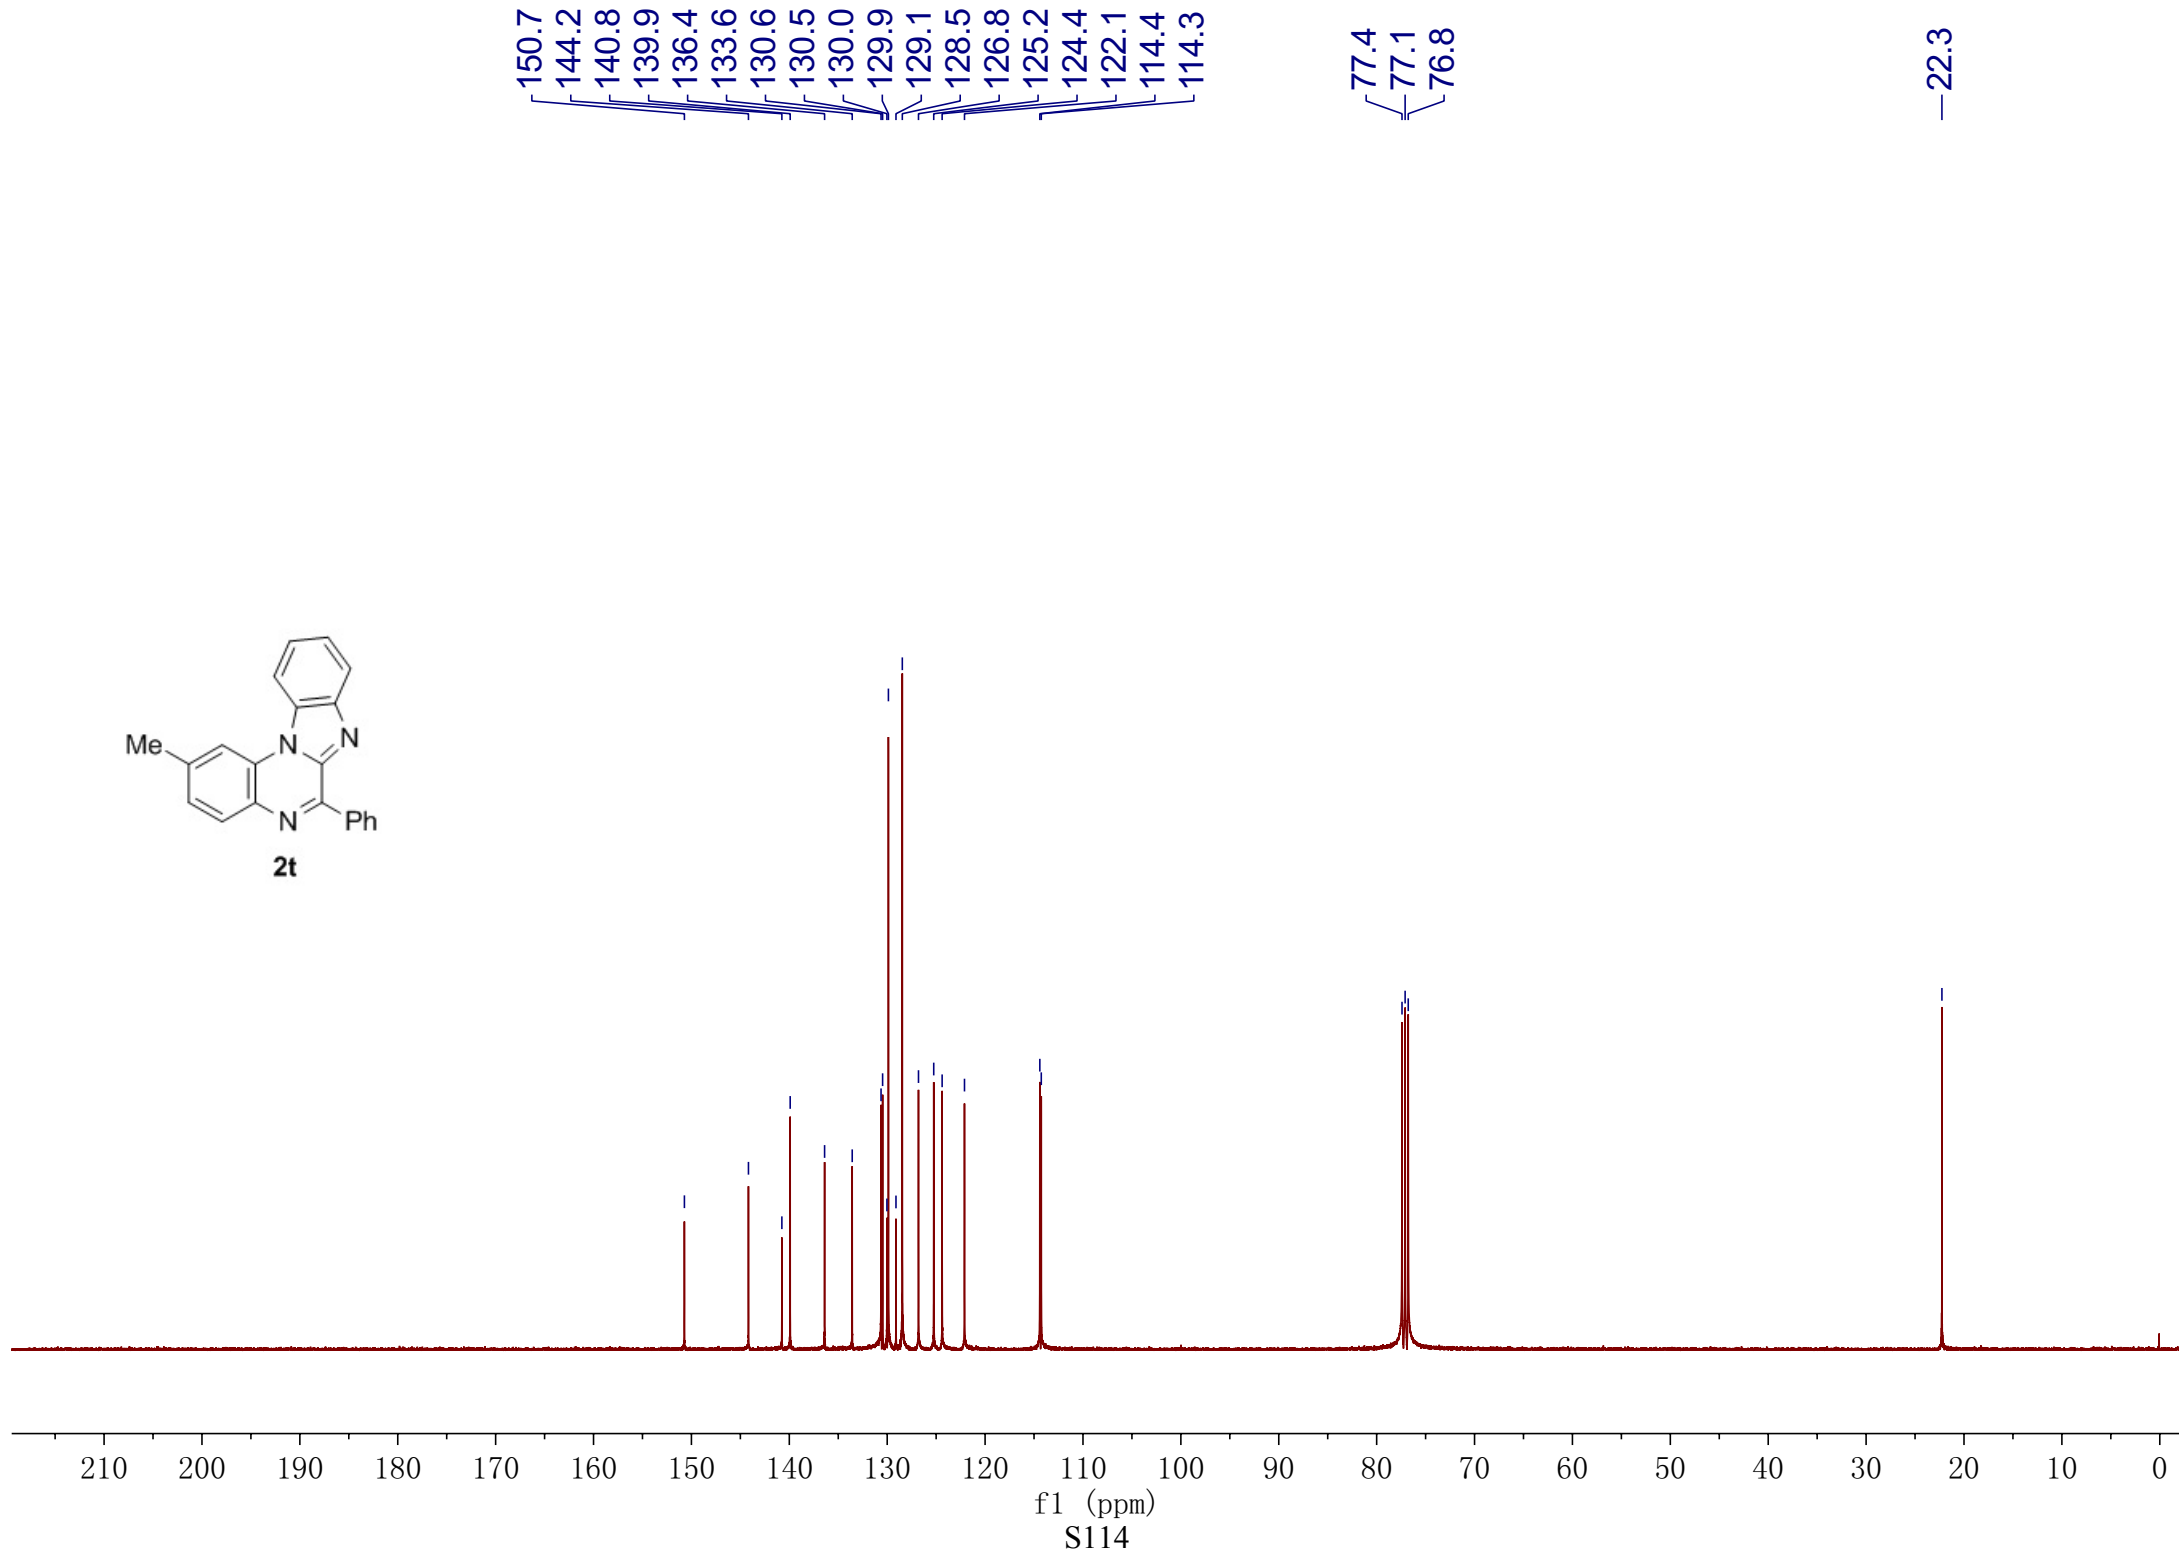

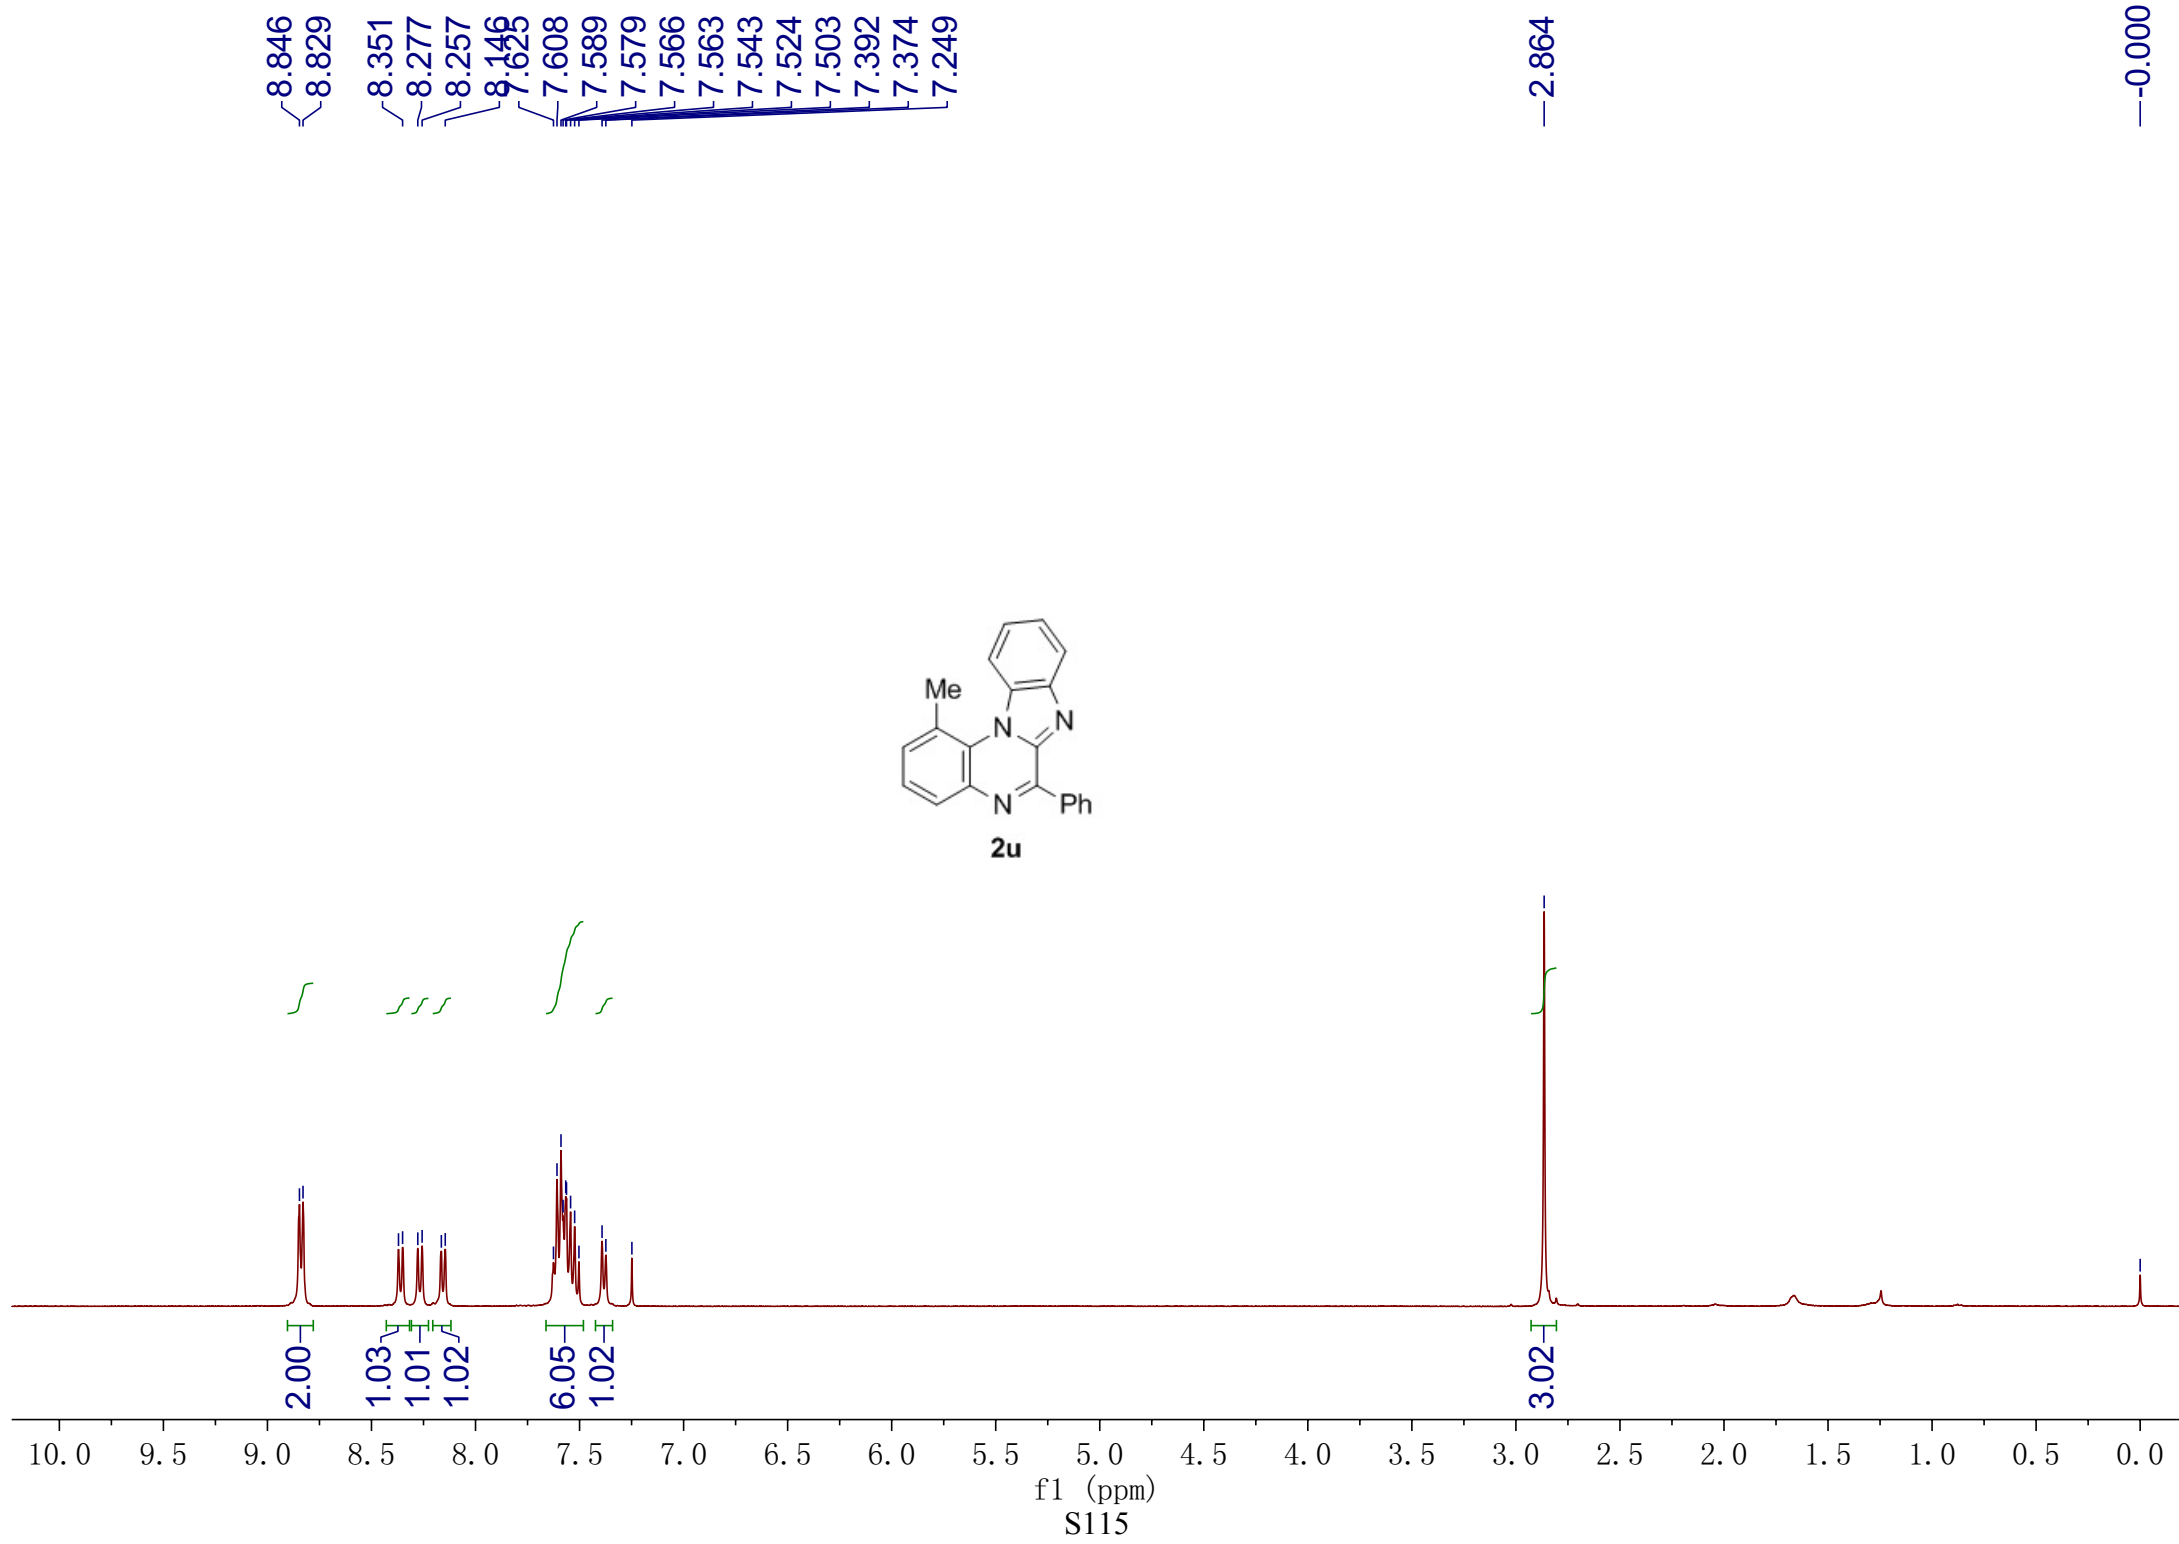

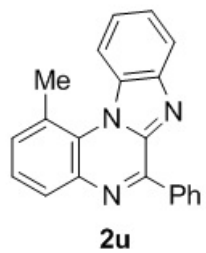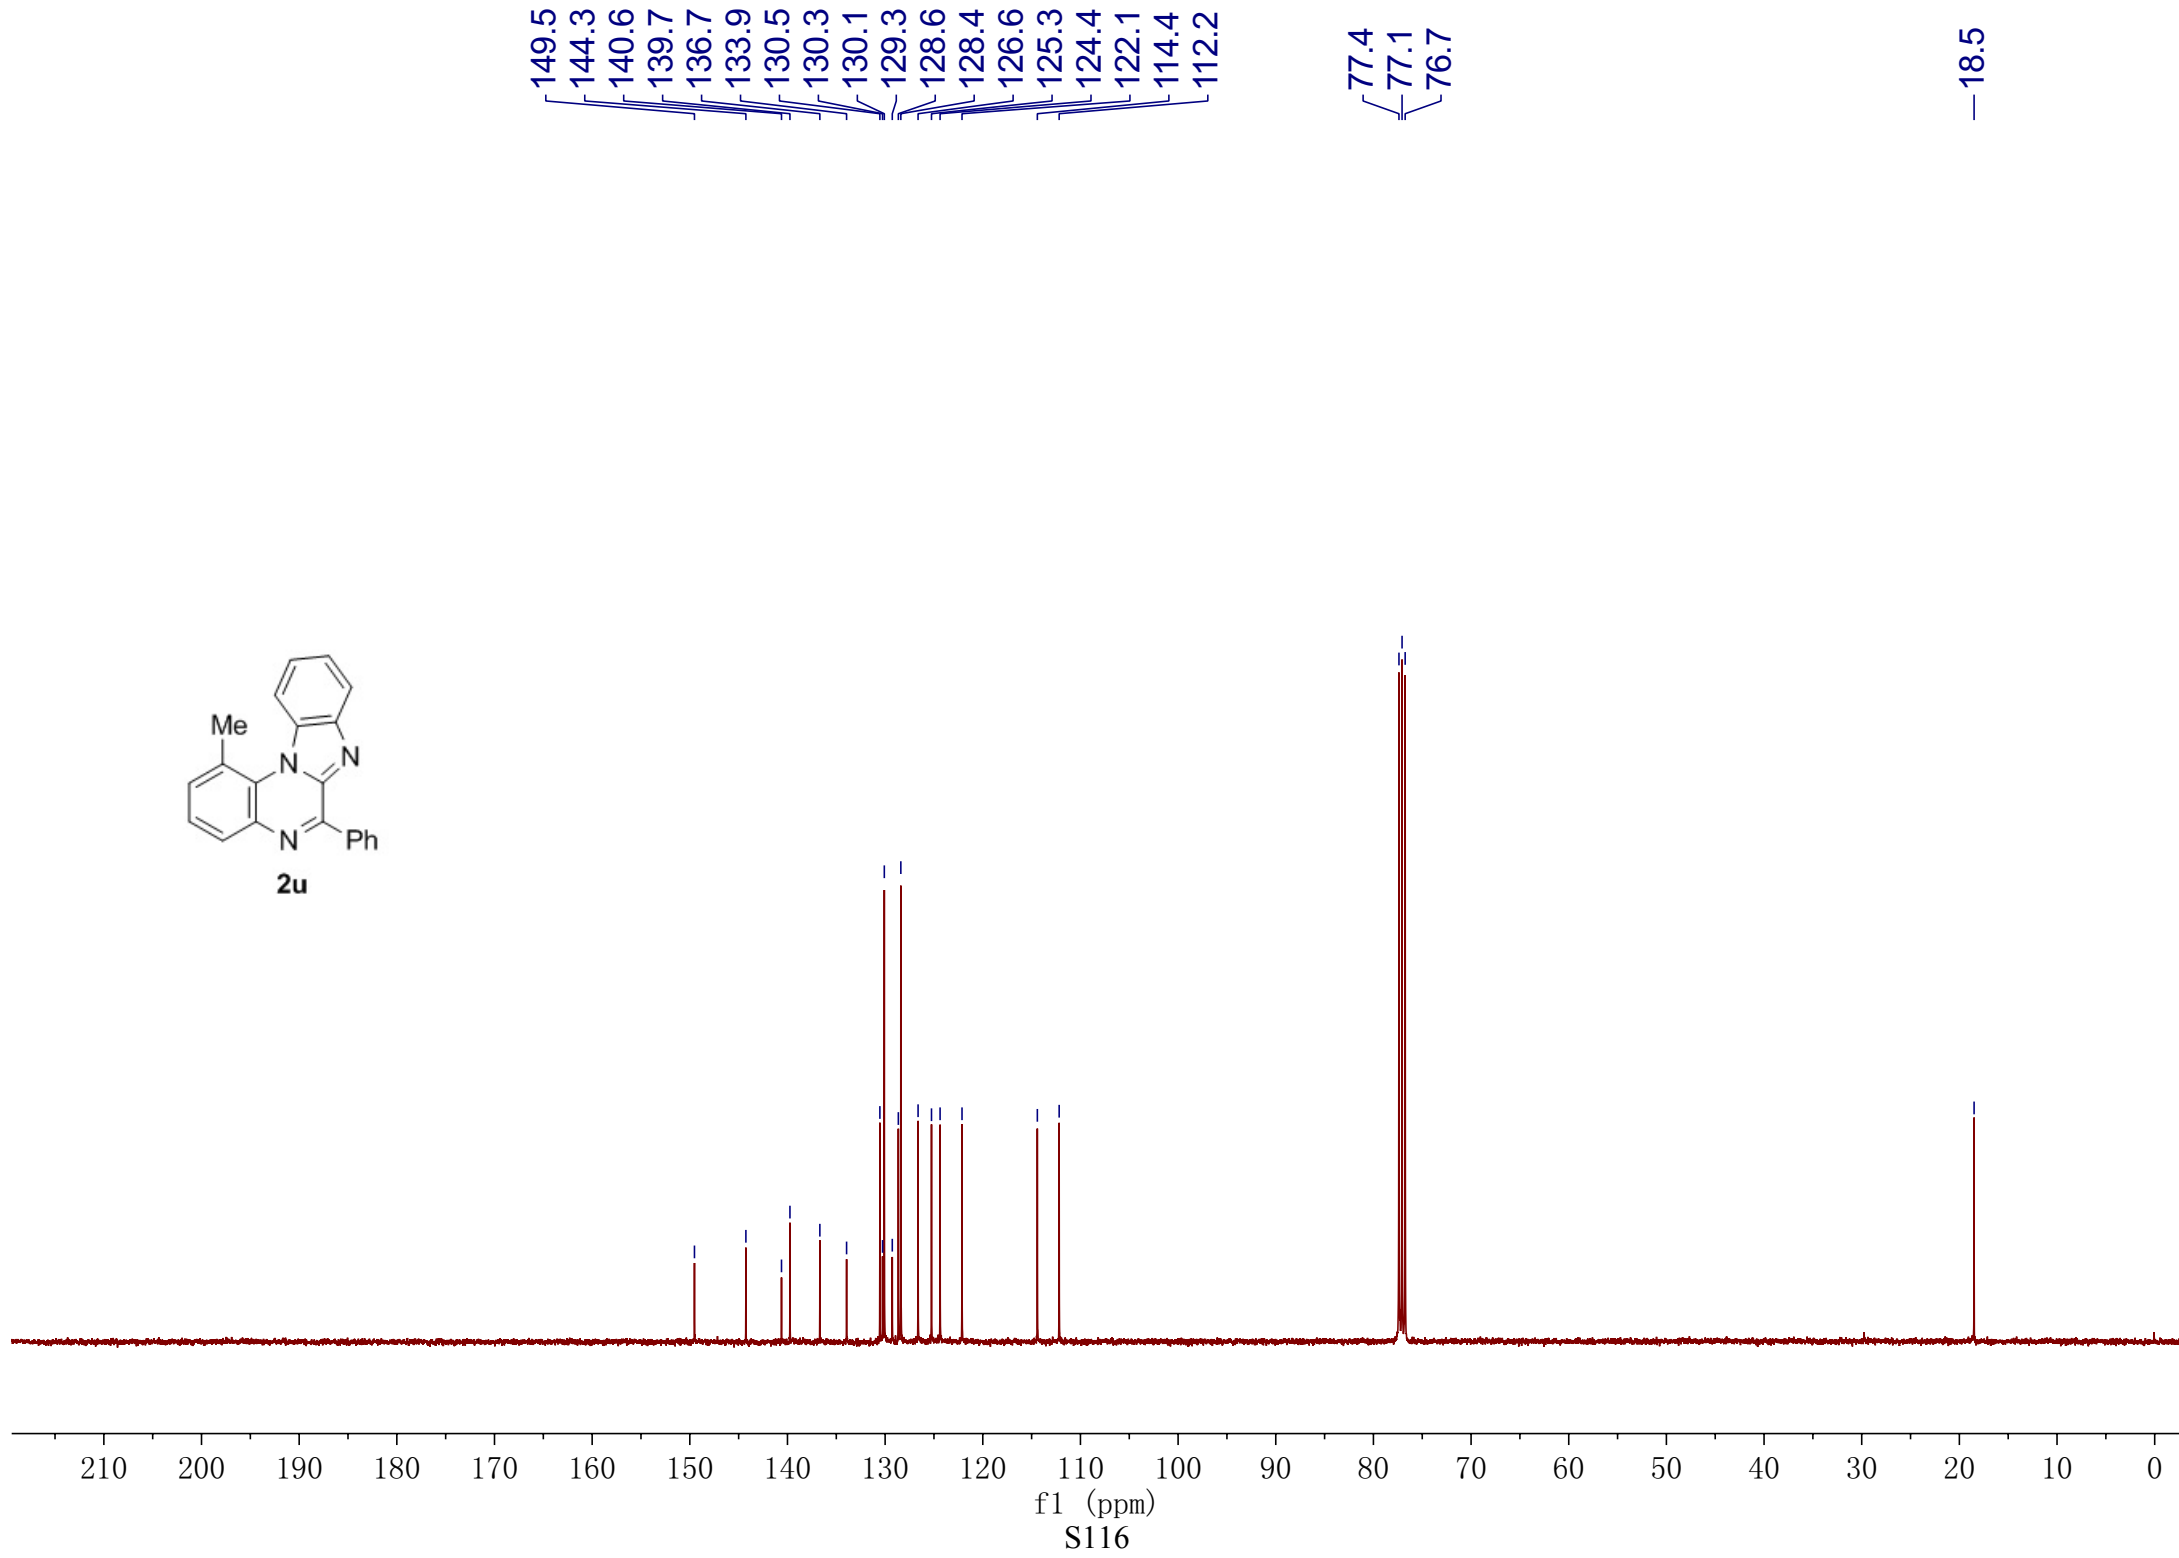



8.651  
8.646  
8.638  
8.635  
8.627  
8.275  
8.272  
8.164  
8.142  
7.988  
7.968  
7.901  
7.898  
7.880  
7.716  
7.711  
7.694  
7.690  
7.526  
7.506  
7.502  
7.493  
7.489  
7.479  
7.466  
7.401  
7.385  
7.366  
7.344  
7.342  
7.326  
7.224

—0.000

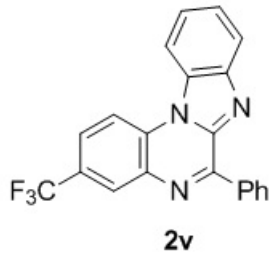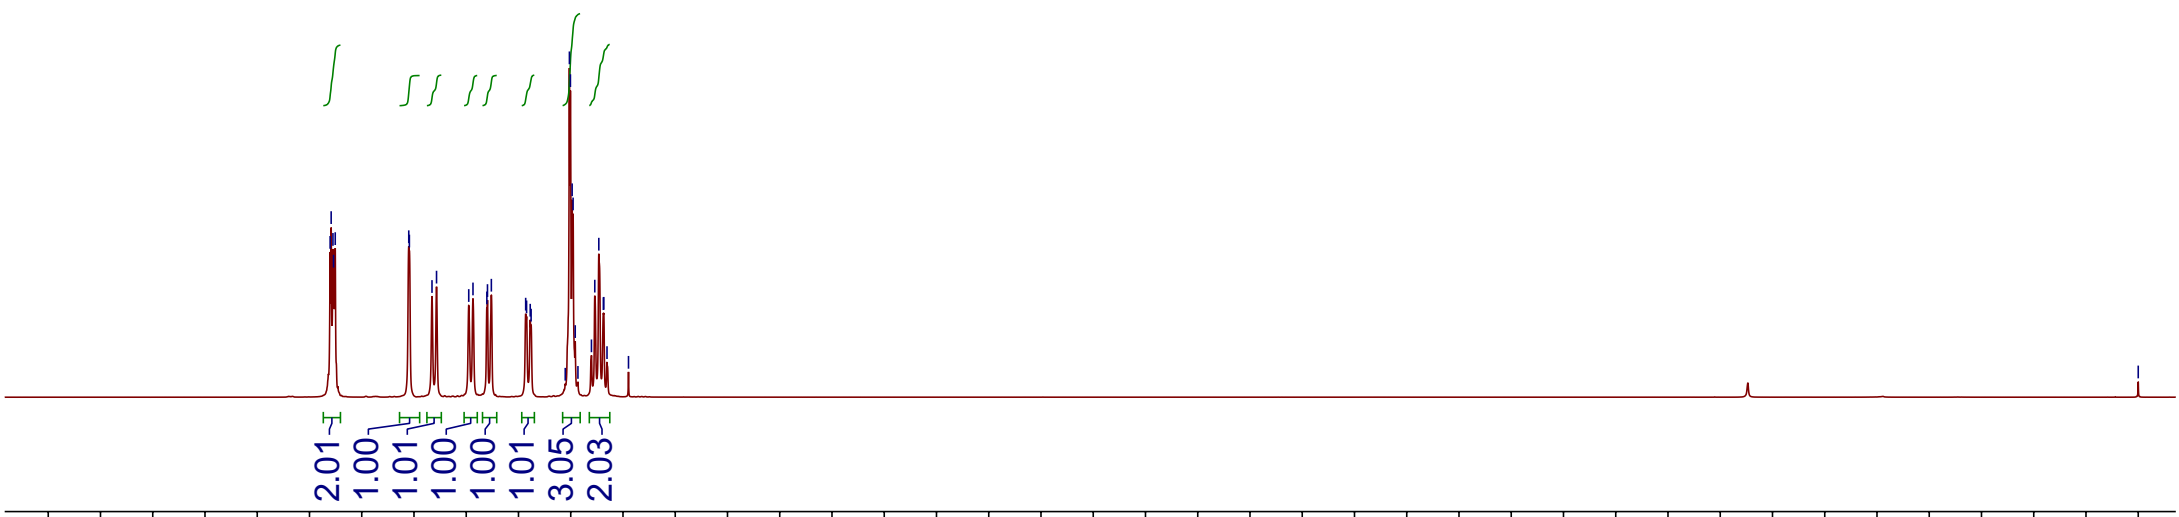

10.0 9.5 9.0 8.5 8.0 7.5 7.0 6.5 6.0 5.5 5.0 4.5 4.0 3.5 3.0 2.5 2.0 1.5 1.0 0.5 0.0

f1 (ppm)  
S117

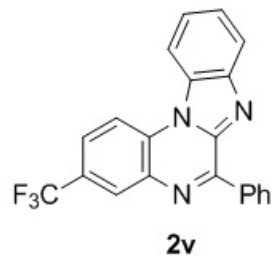

- 152.4
- ✓ 143.9
- ✓ 140.0
- ✓ 135.4
- ✓ 134.8
- ✓ 131.1
- ✓ 130.0
- ✓ 129.5
- ✓ 128.4
- ✓ 128.2
- ✓ 128.1
- ✓ 125.6
- ✓ 125.1
- ✓ 125.0
- ✓ 125.0
- ✓ 122.3
- ✓ 114.7
- ✓ 113.6
- ✓ 77.5
- ✓ 77.1
- ✓ 76.8

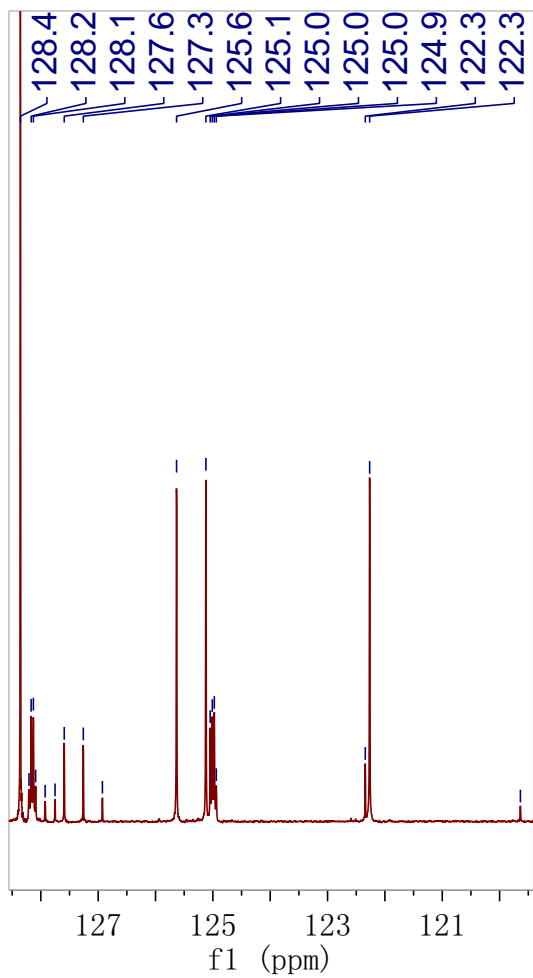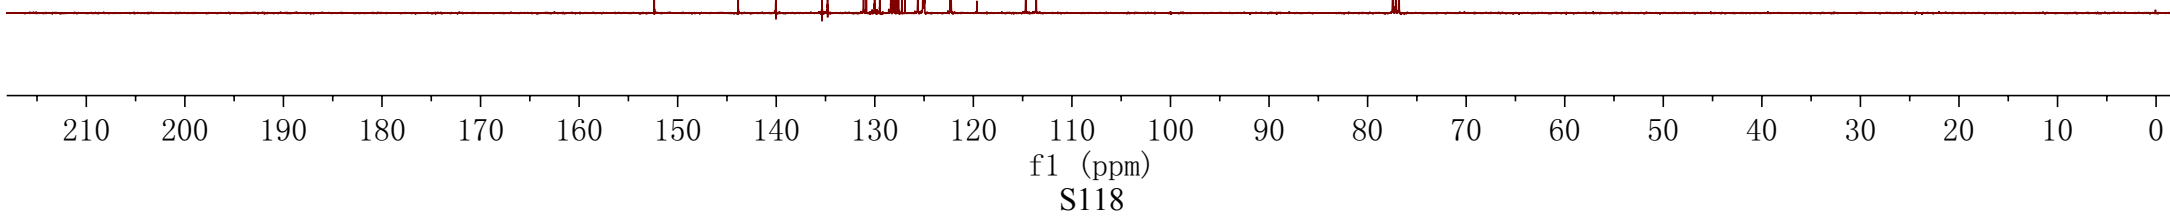

8.684  
8.674  
8.665  
8.660  
8.108  
8.031  
8.012  
7.565  
7.556  
7.551  
7.477  
7.465  
7.458  
7.449  
7.428  
7.412  
7.242

0.000

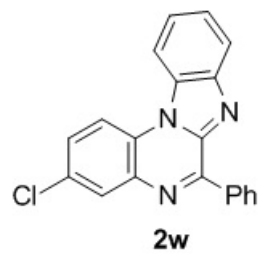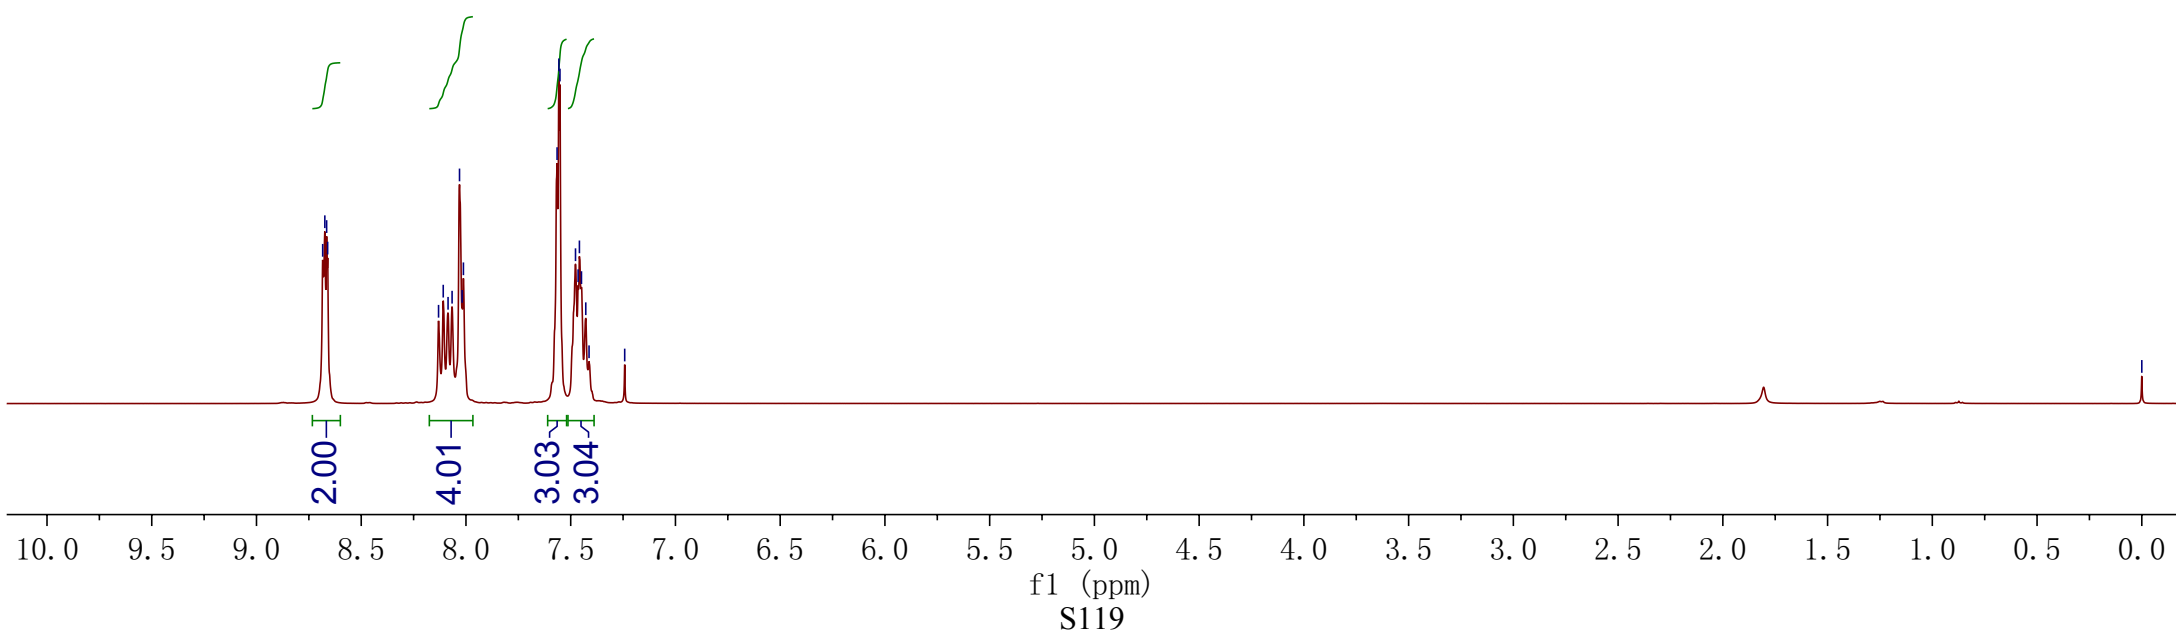

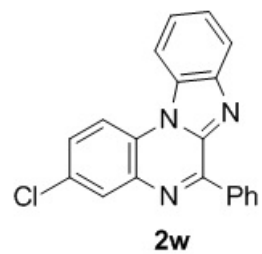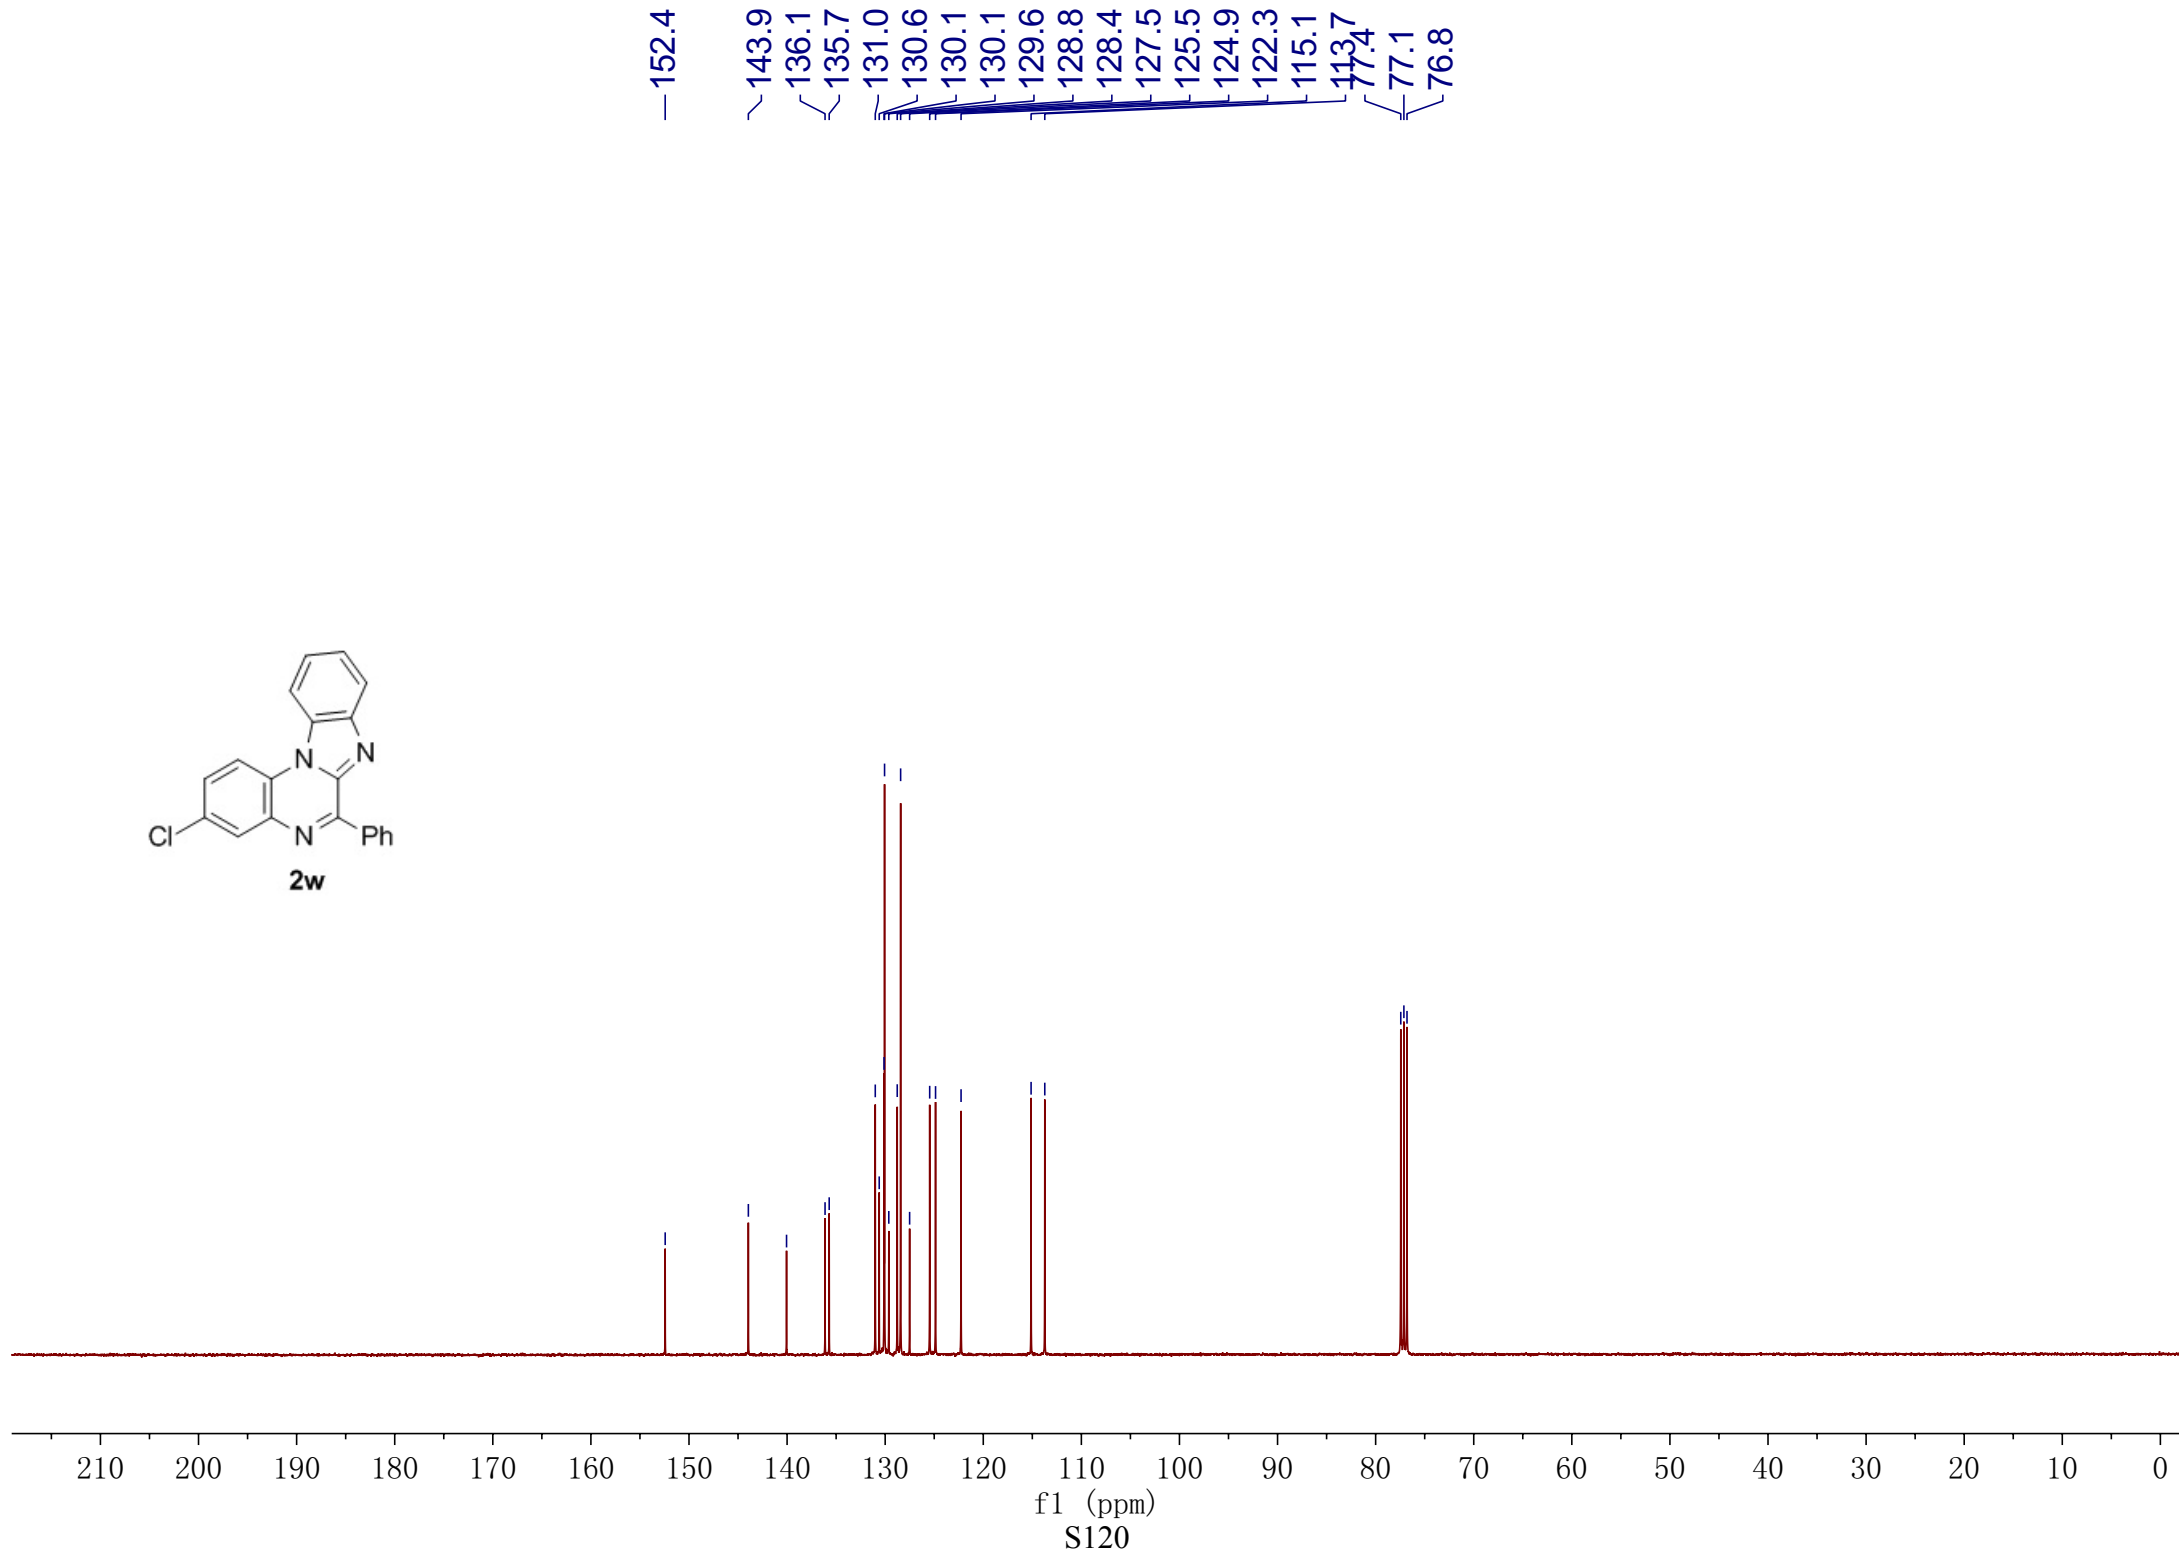

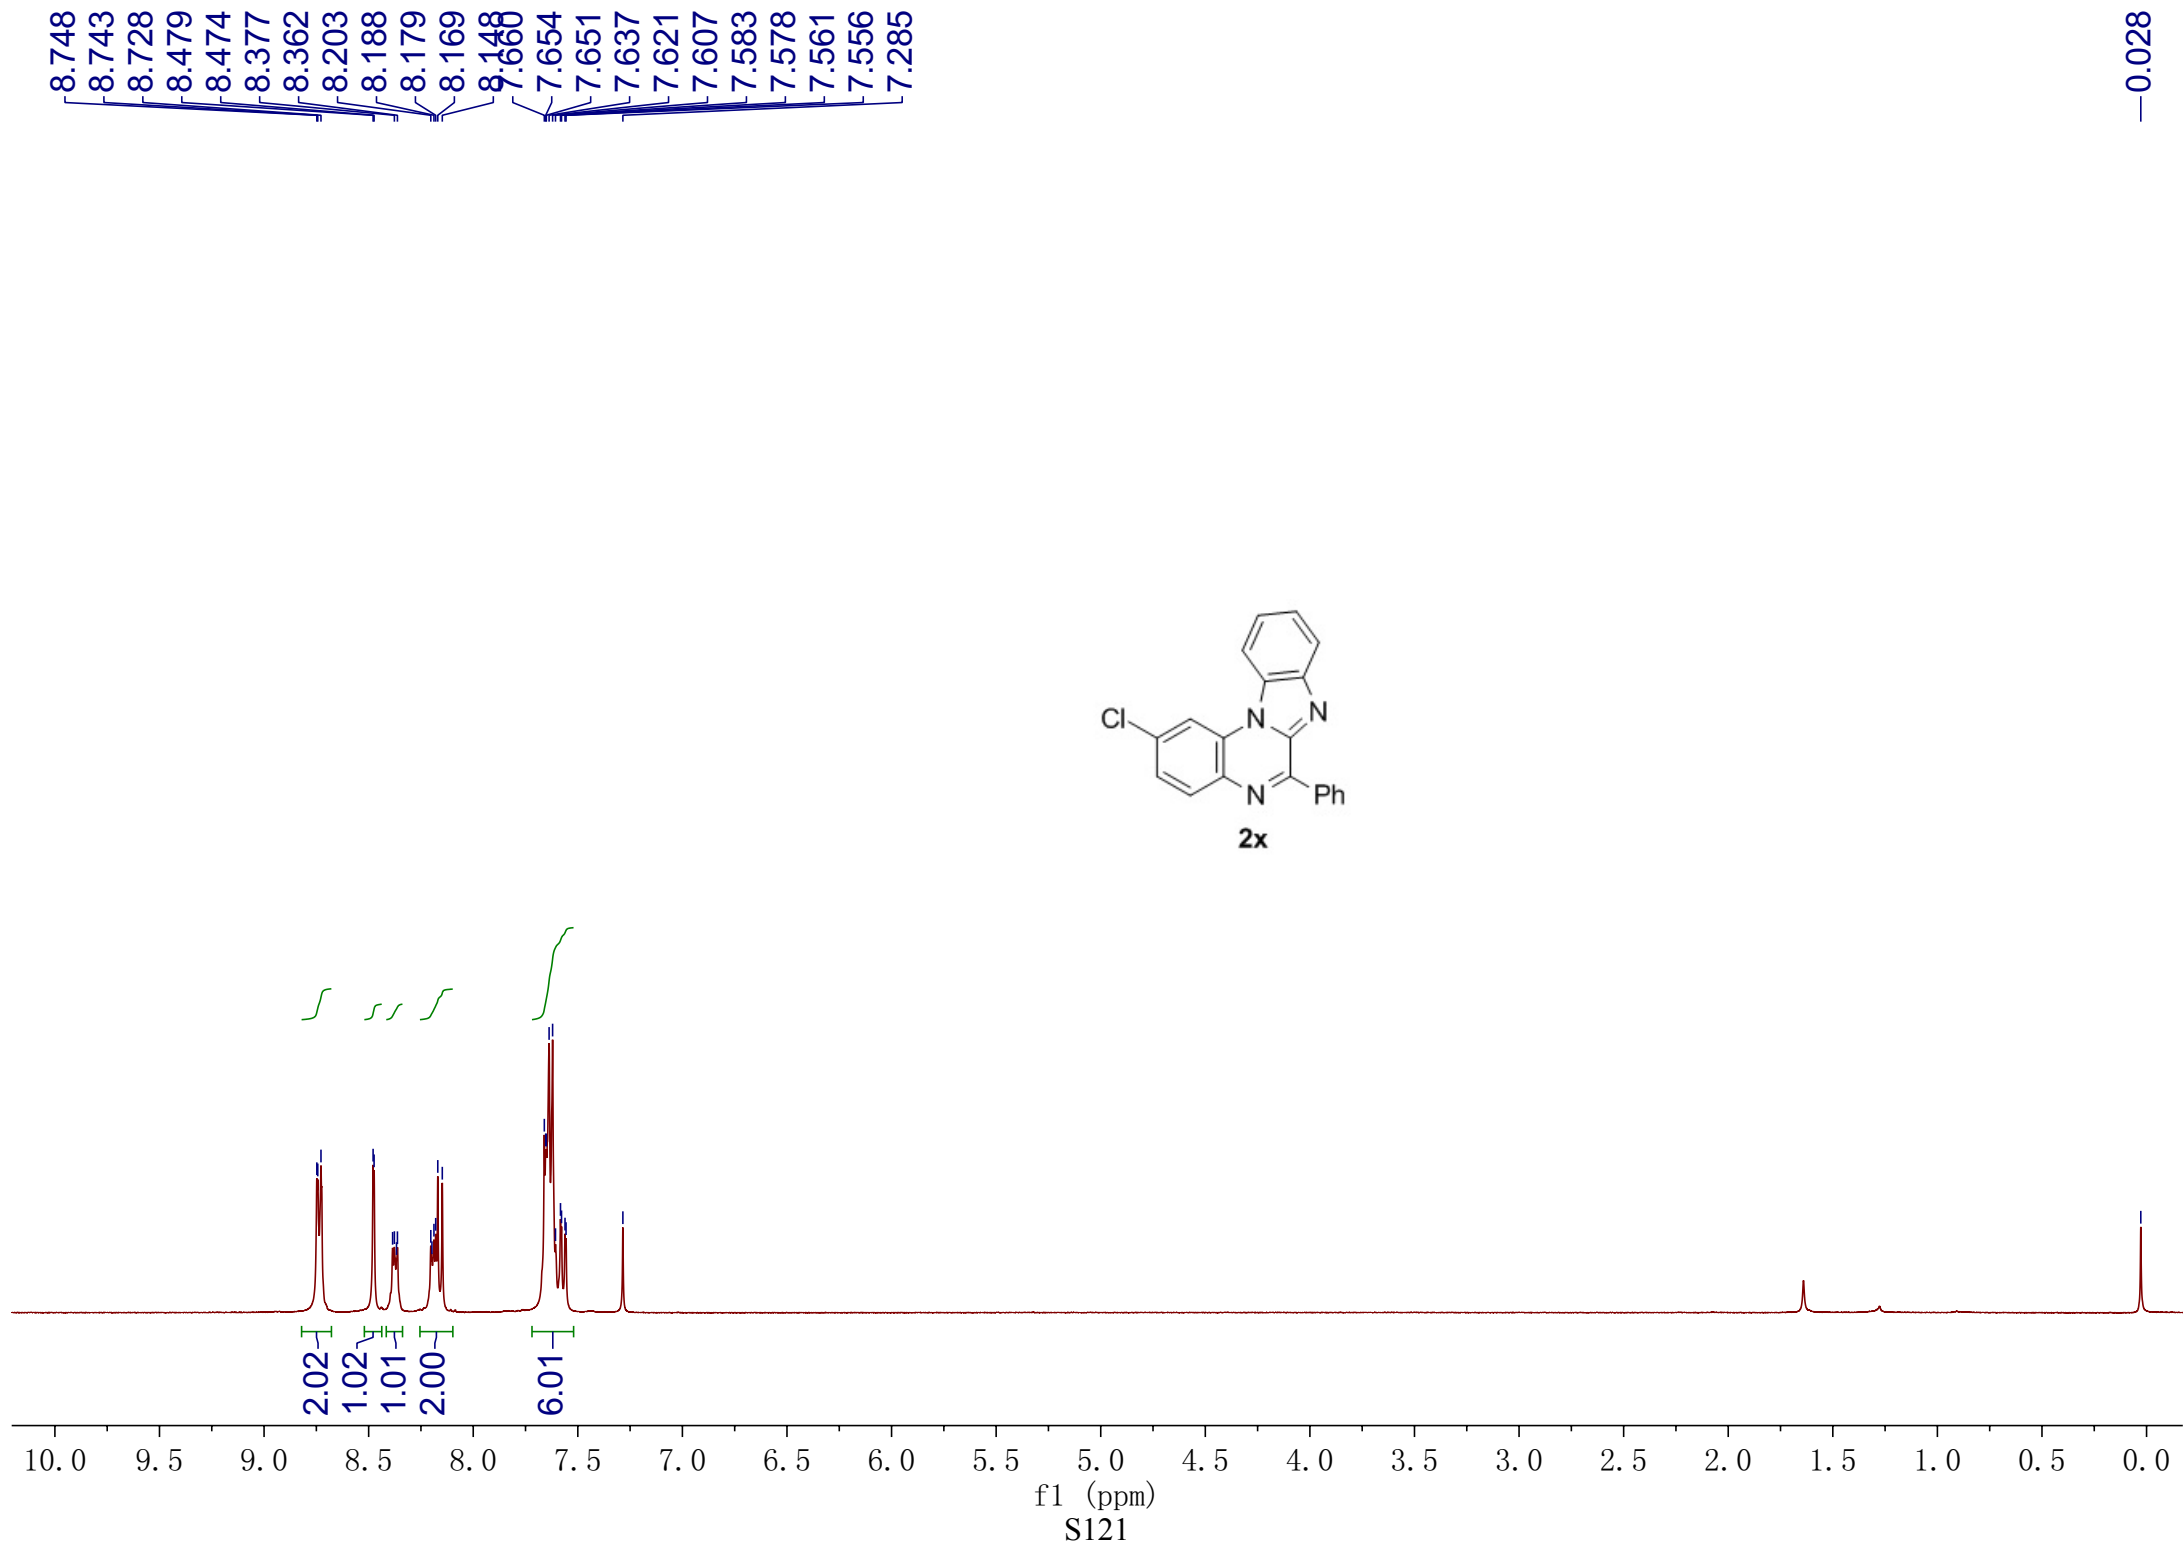

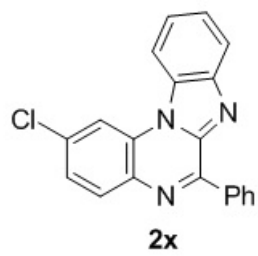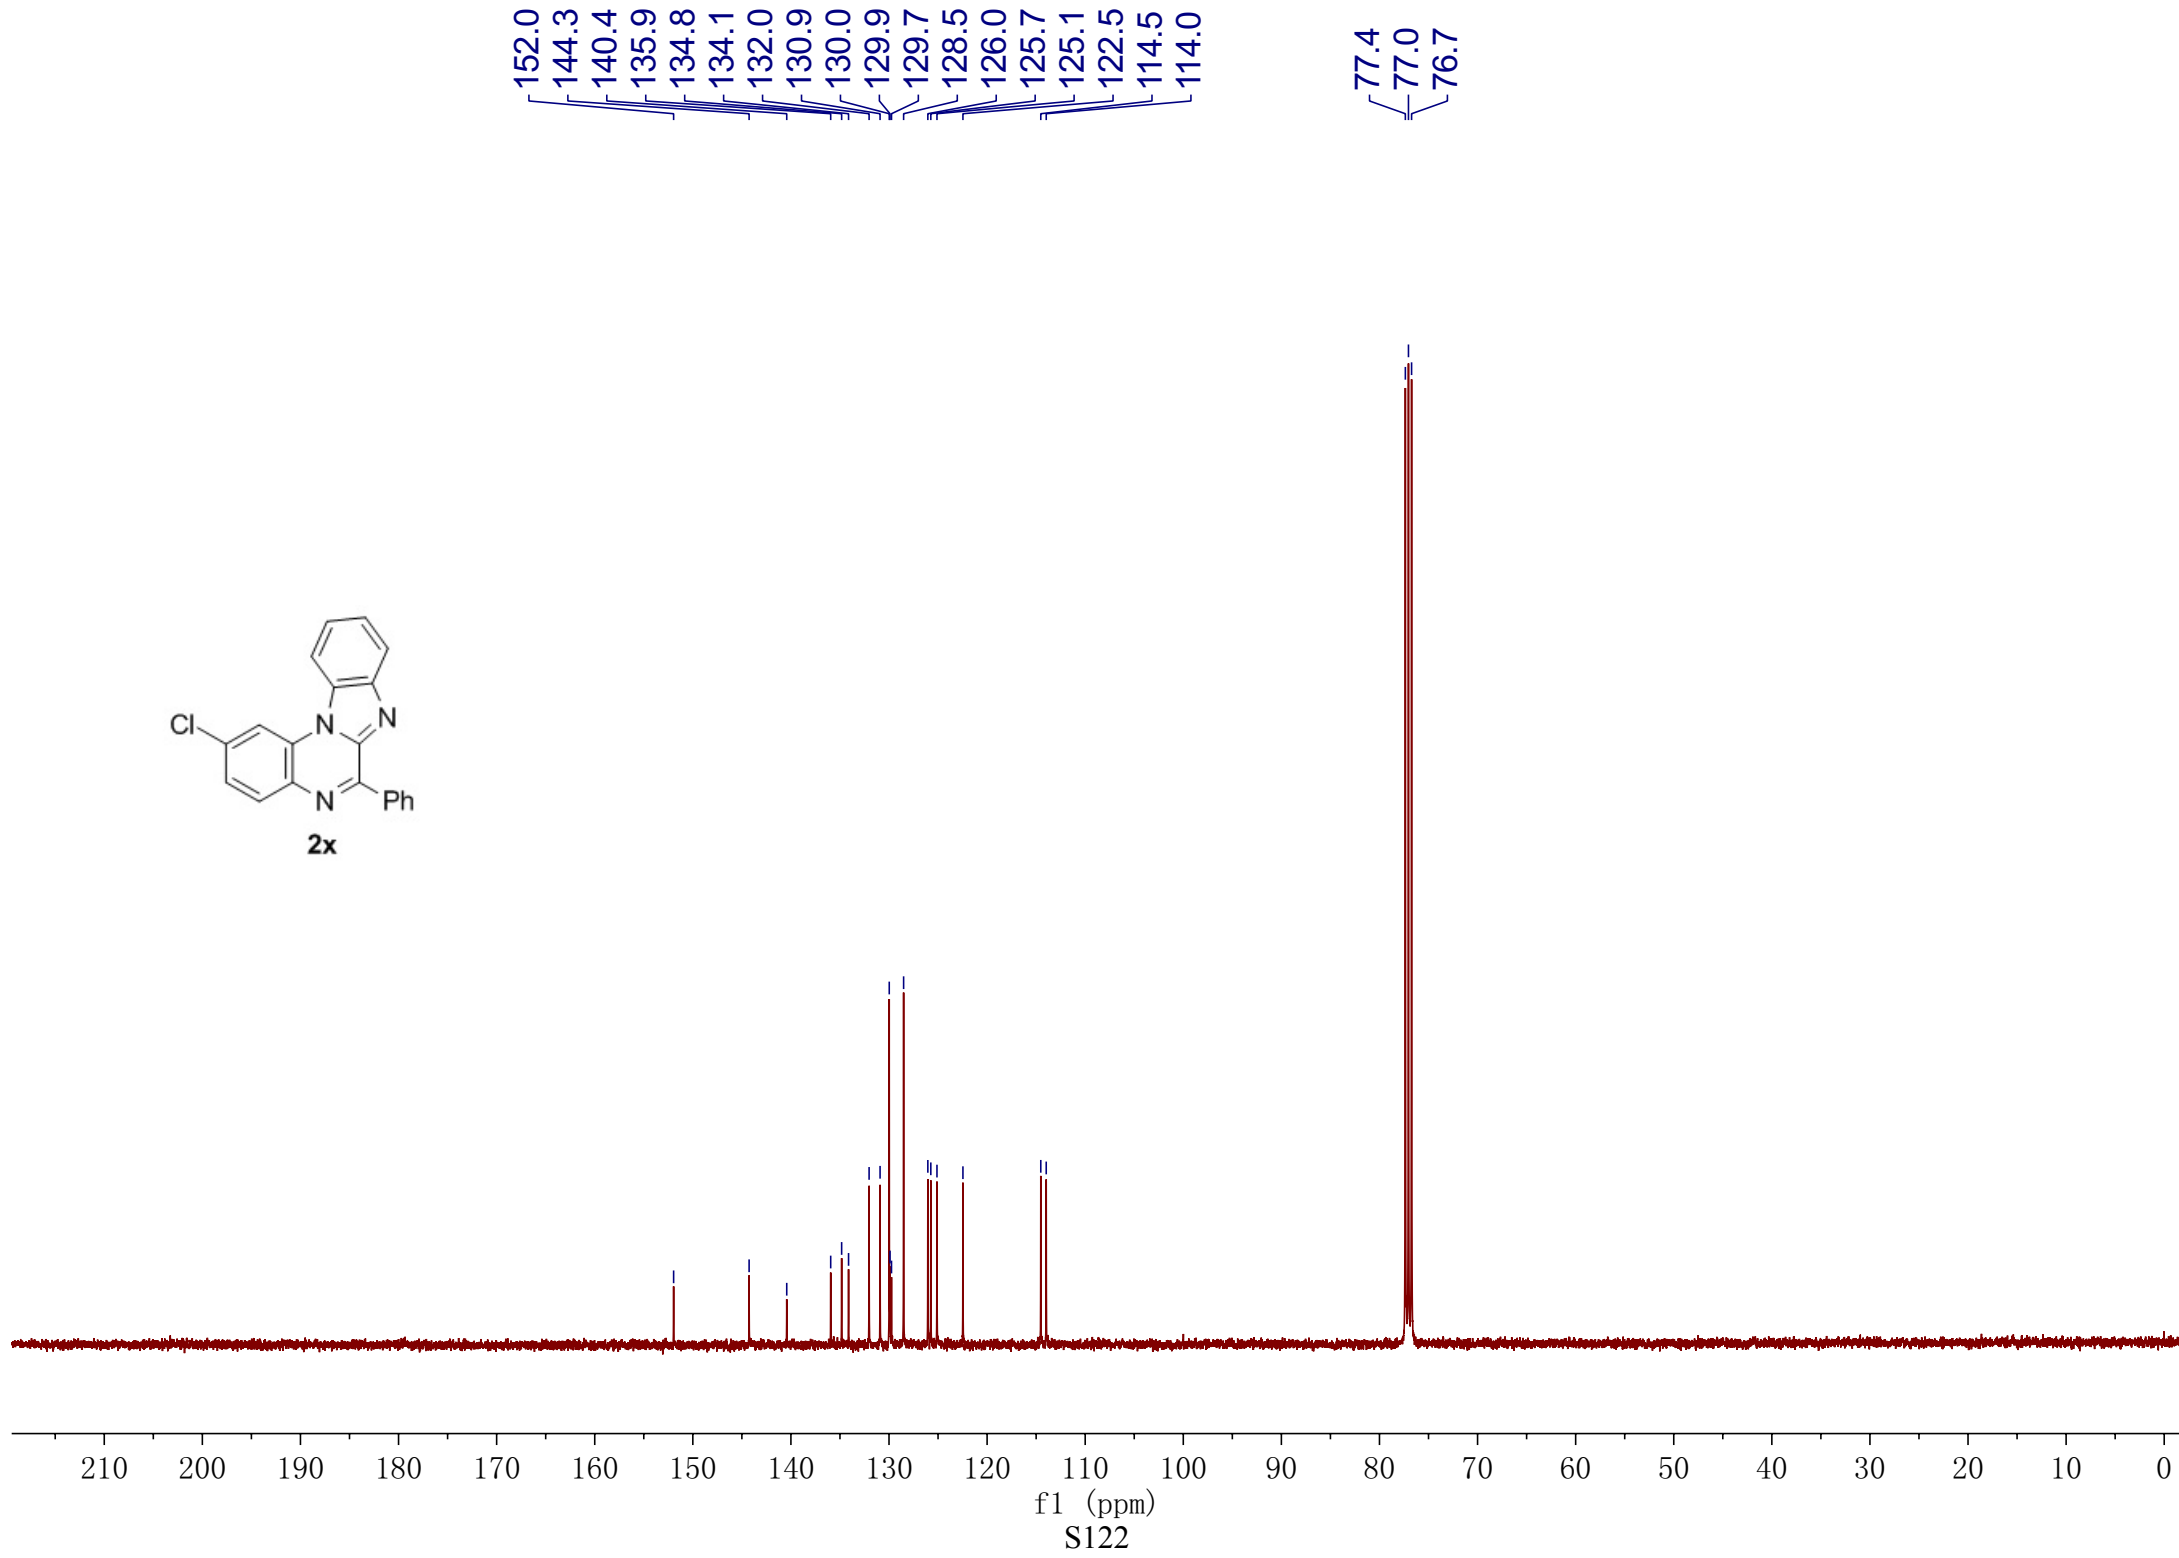

8.689  
8.683  
8.673  
8.669  
8.665

8.249  
8.181  
8.177  
8.168  
8.164  
8.158  
8.086  
8.079  
8.075  
8.067  
8.063  
7.915  
7.606  
7.597  
7.592  
7.584  
7.568  
7.565  
7.556  
7.551  
7.545  
7.532  
7.531  
7.527  
7.520  
7.519  
7.512  
7.509  
7.507  
7.494  
2.451  
-0.000

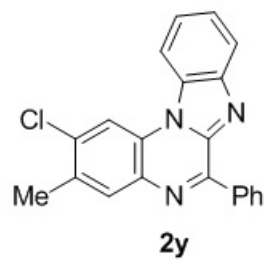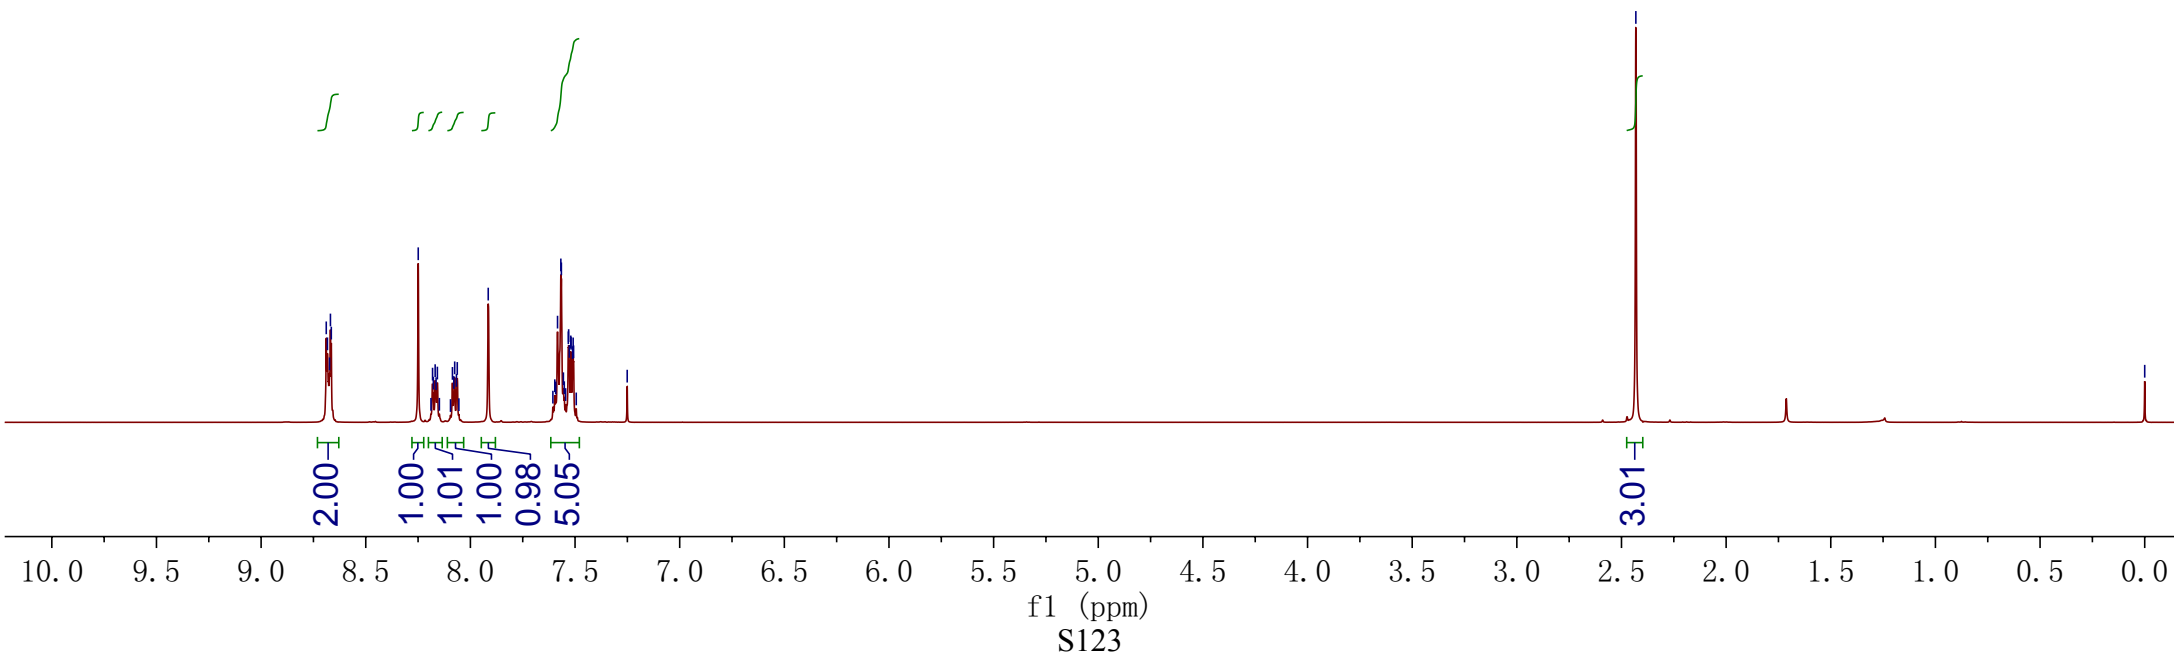

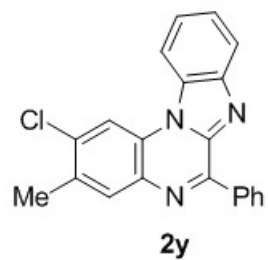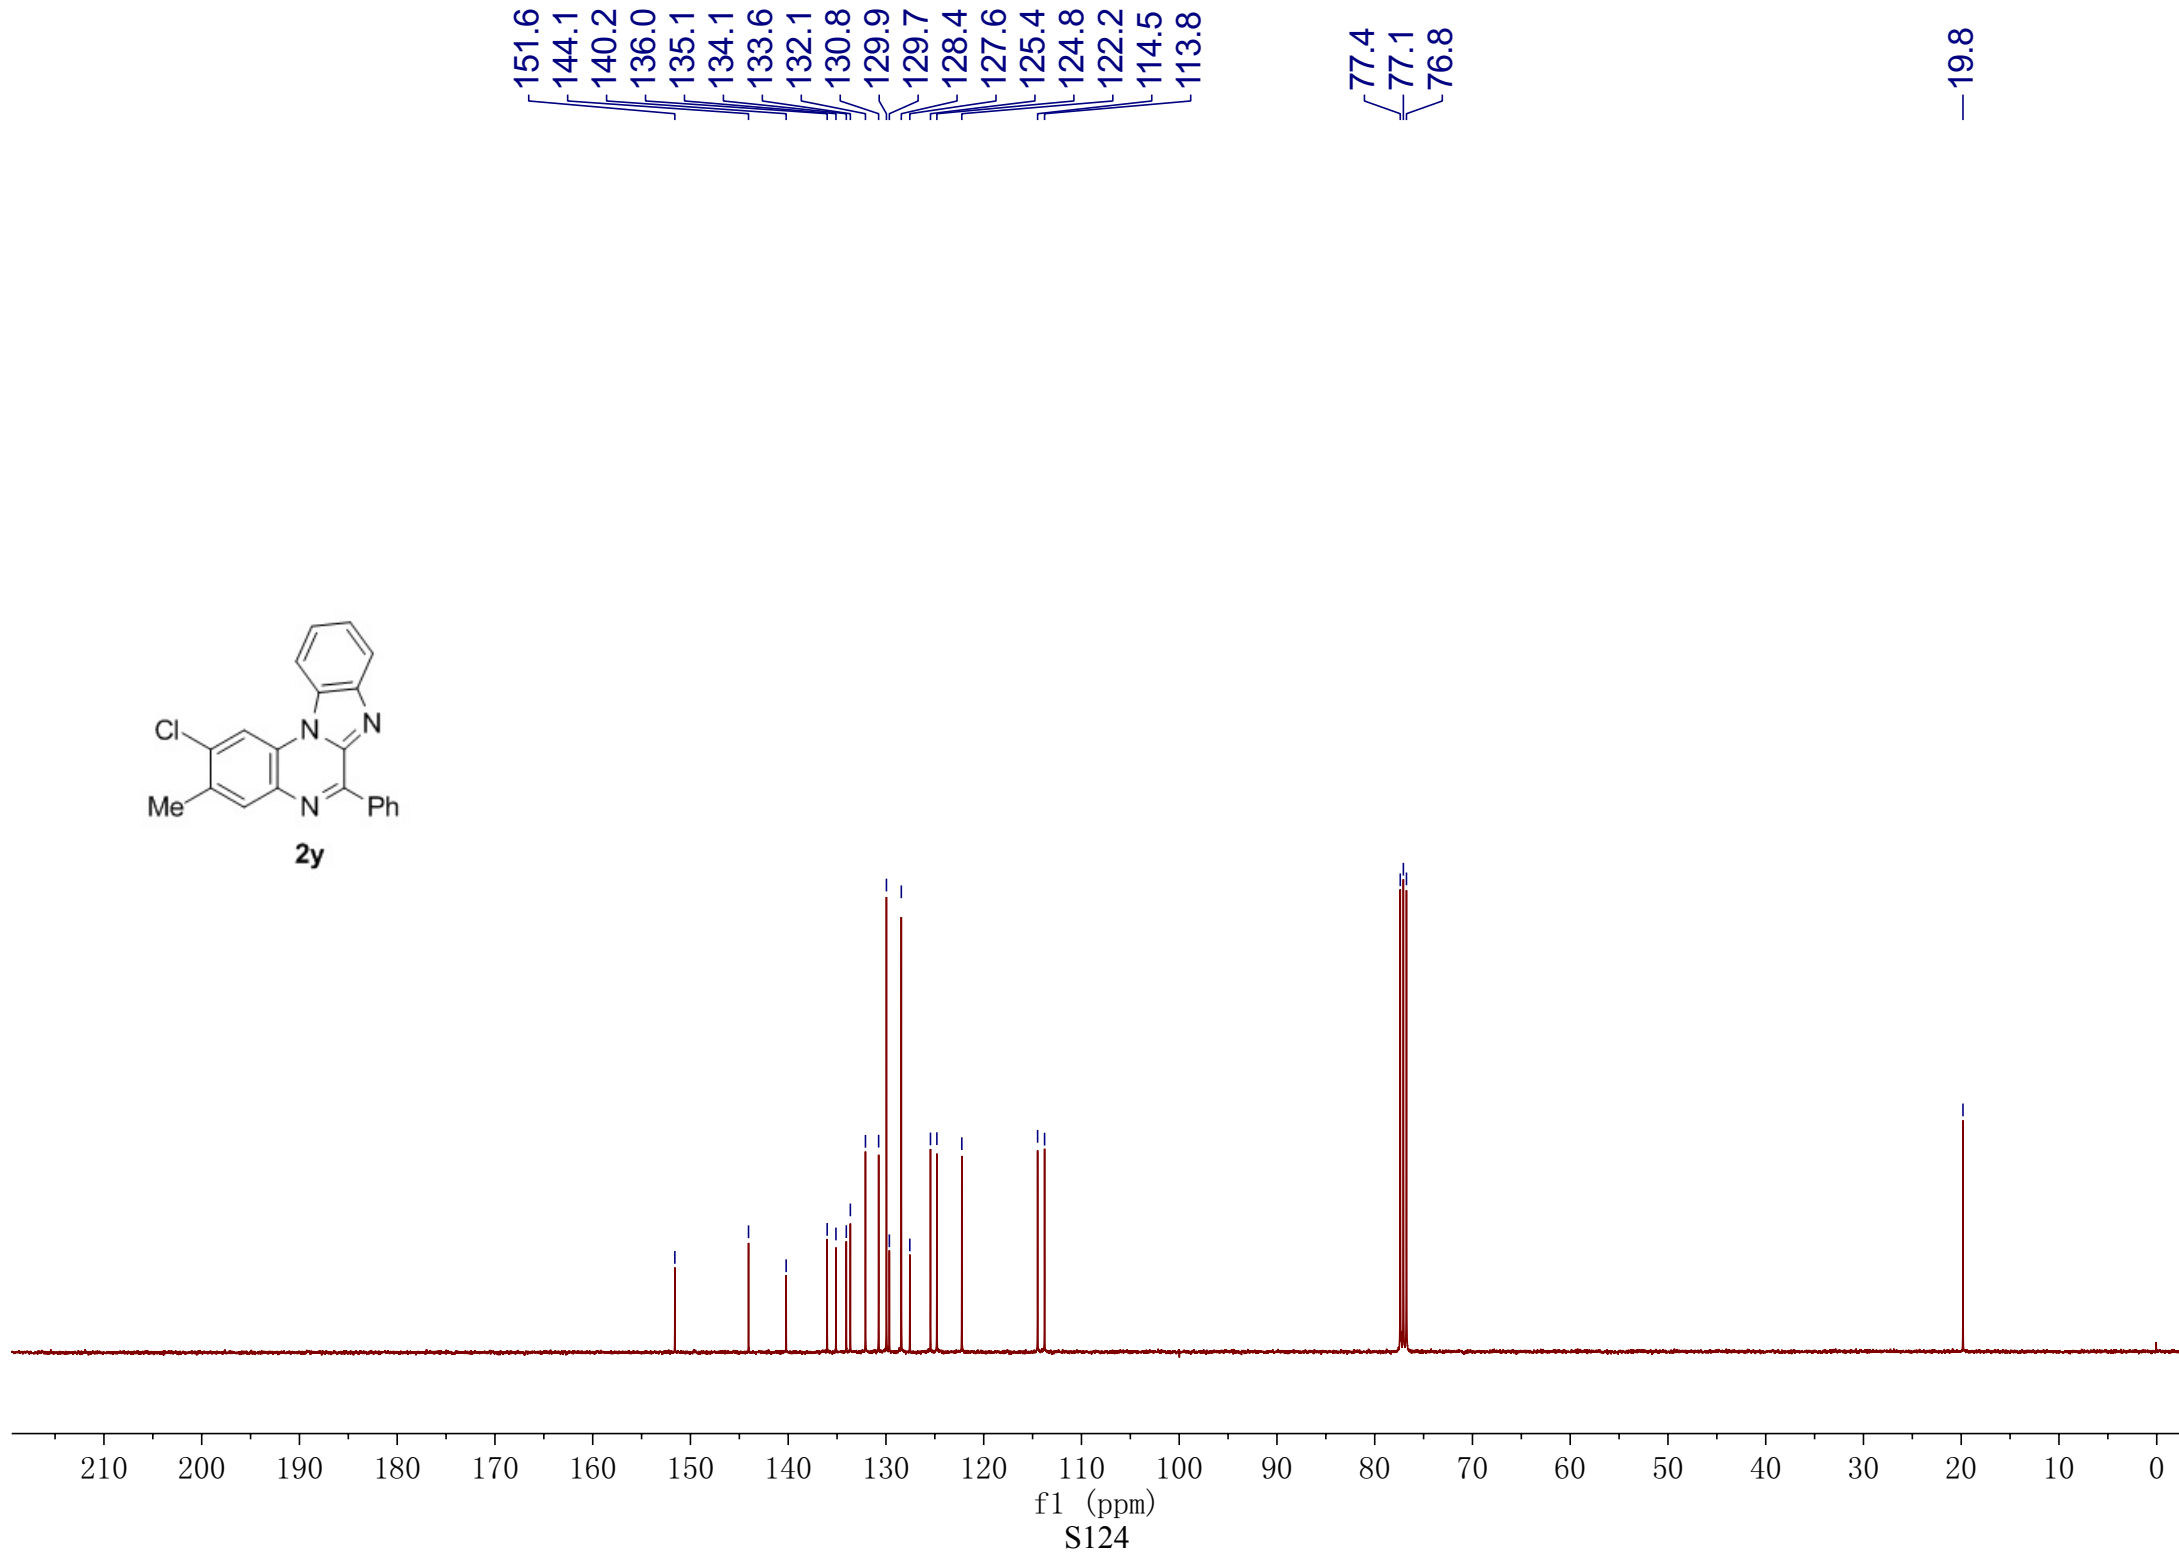



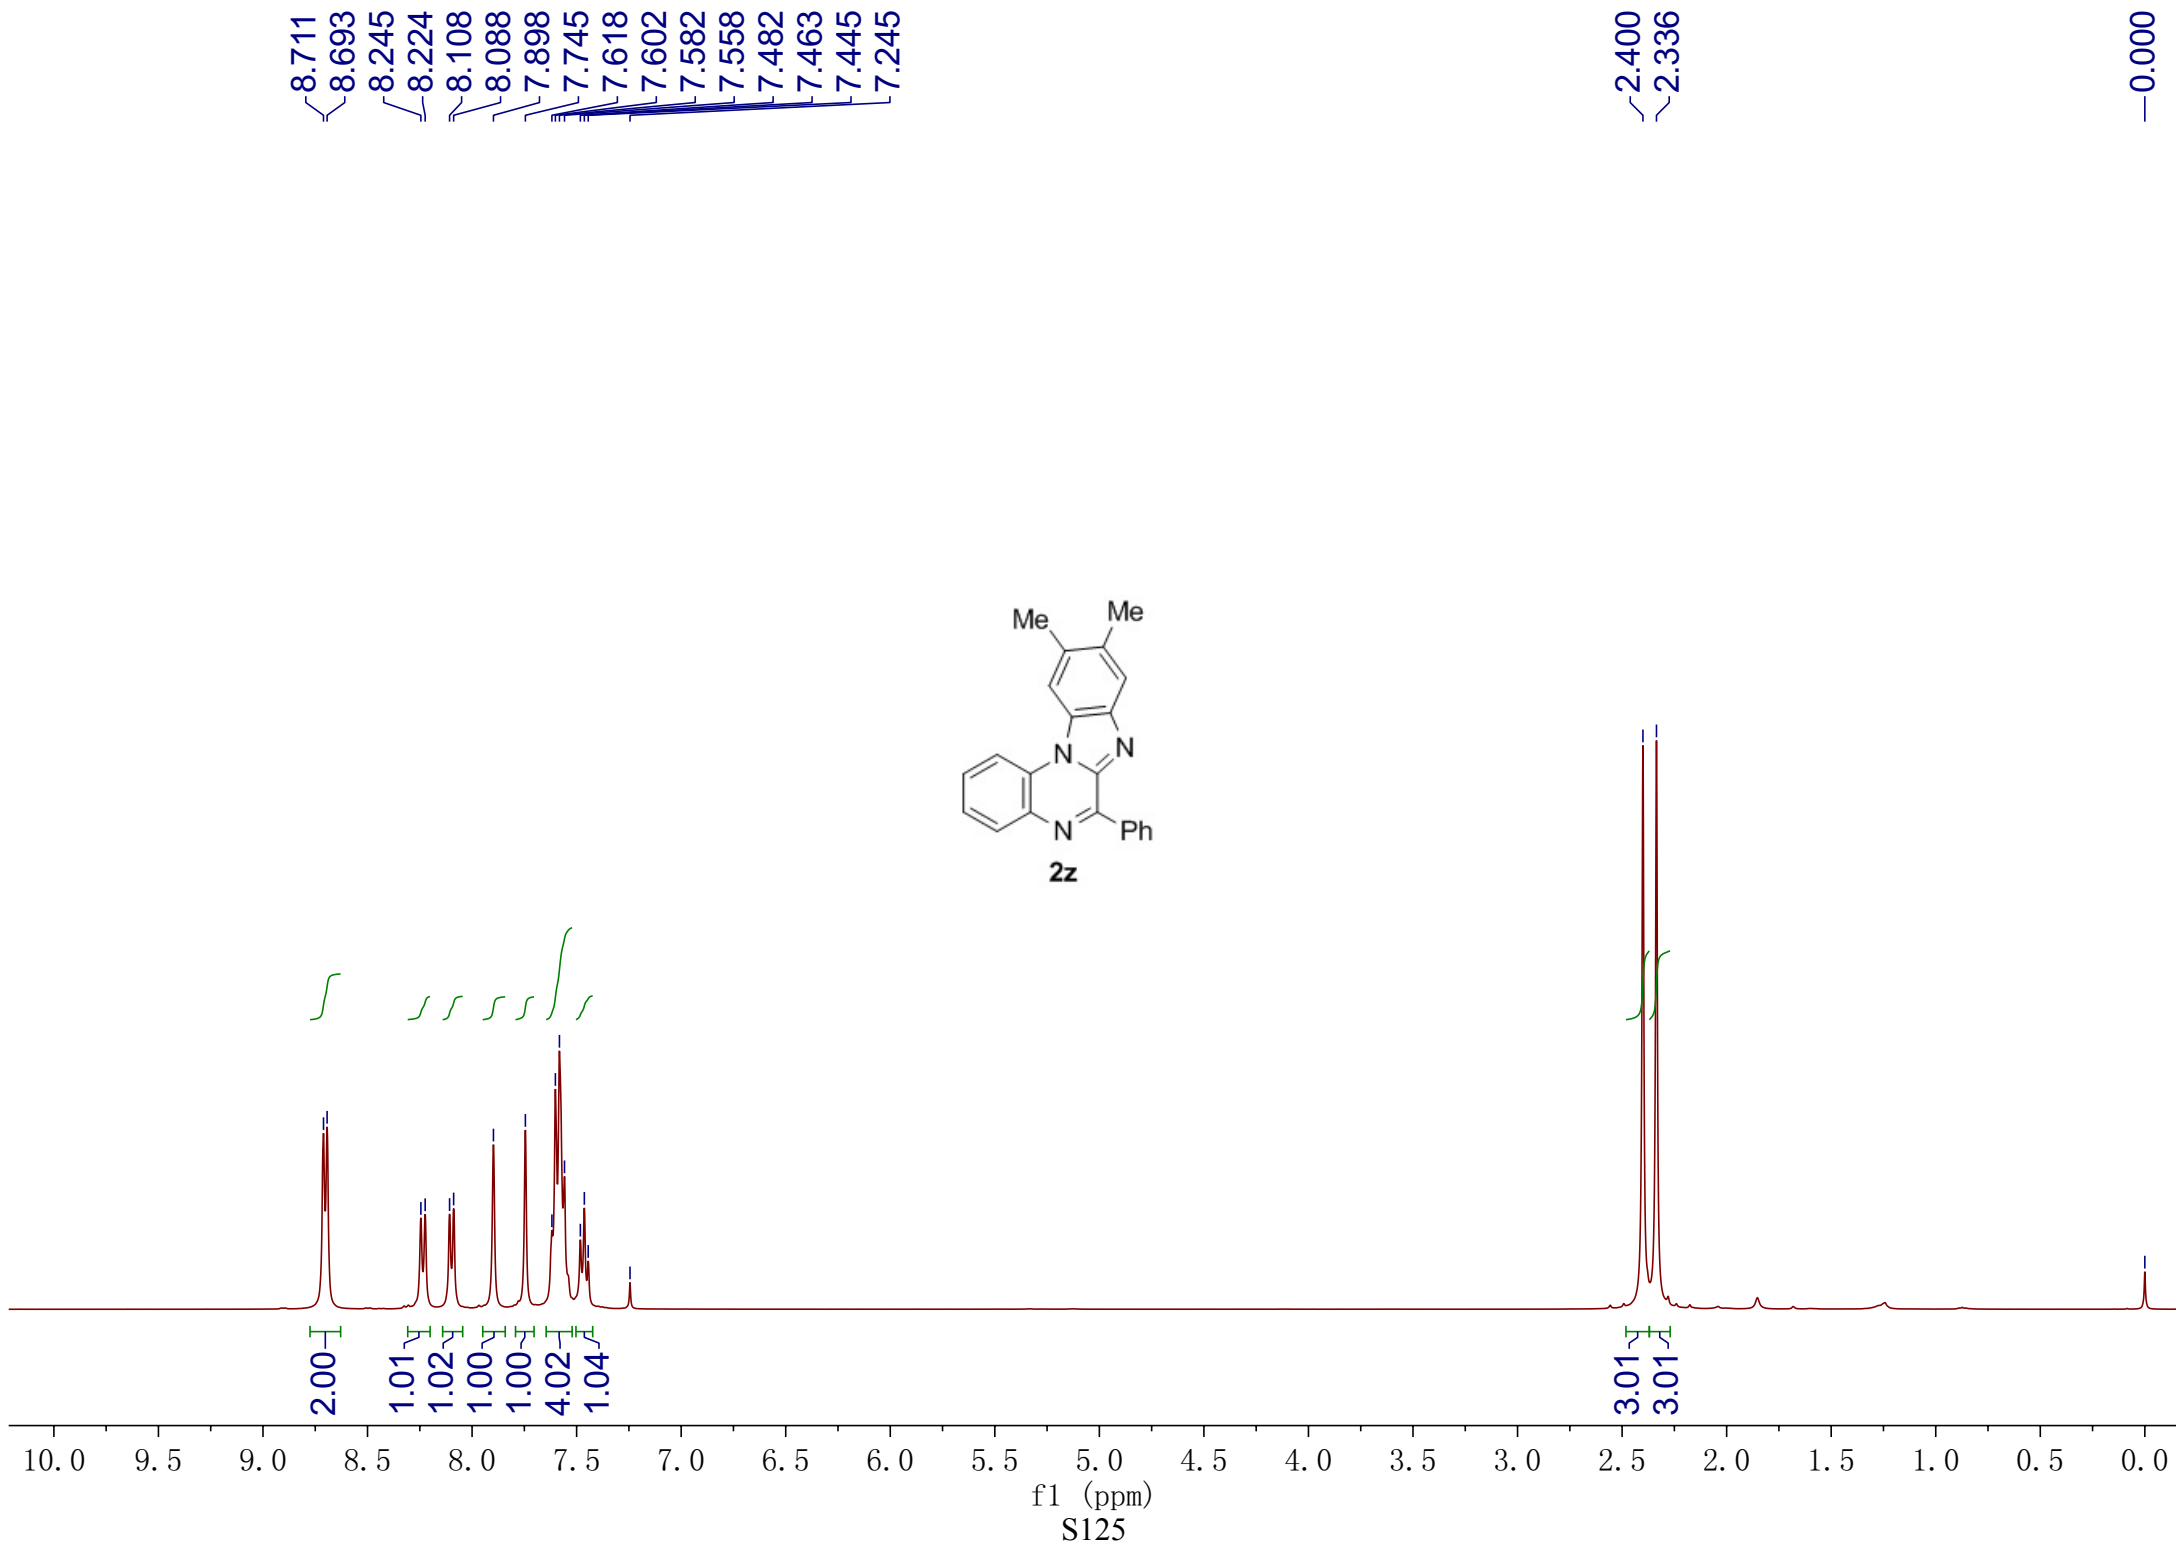

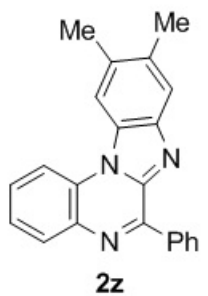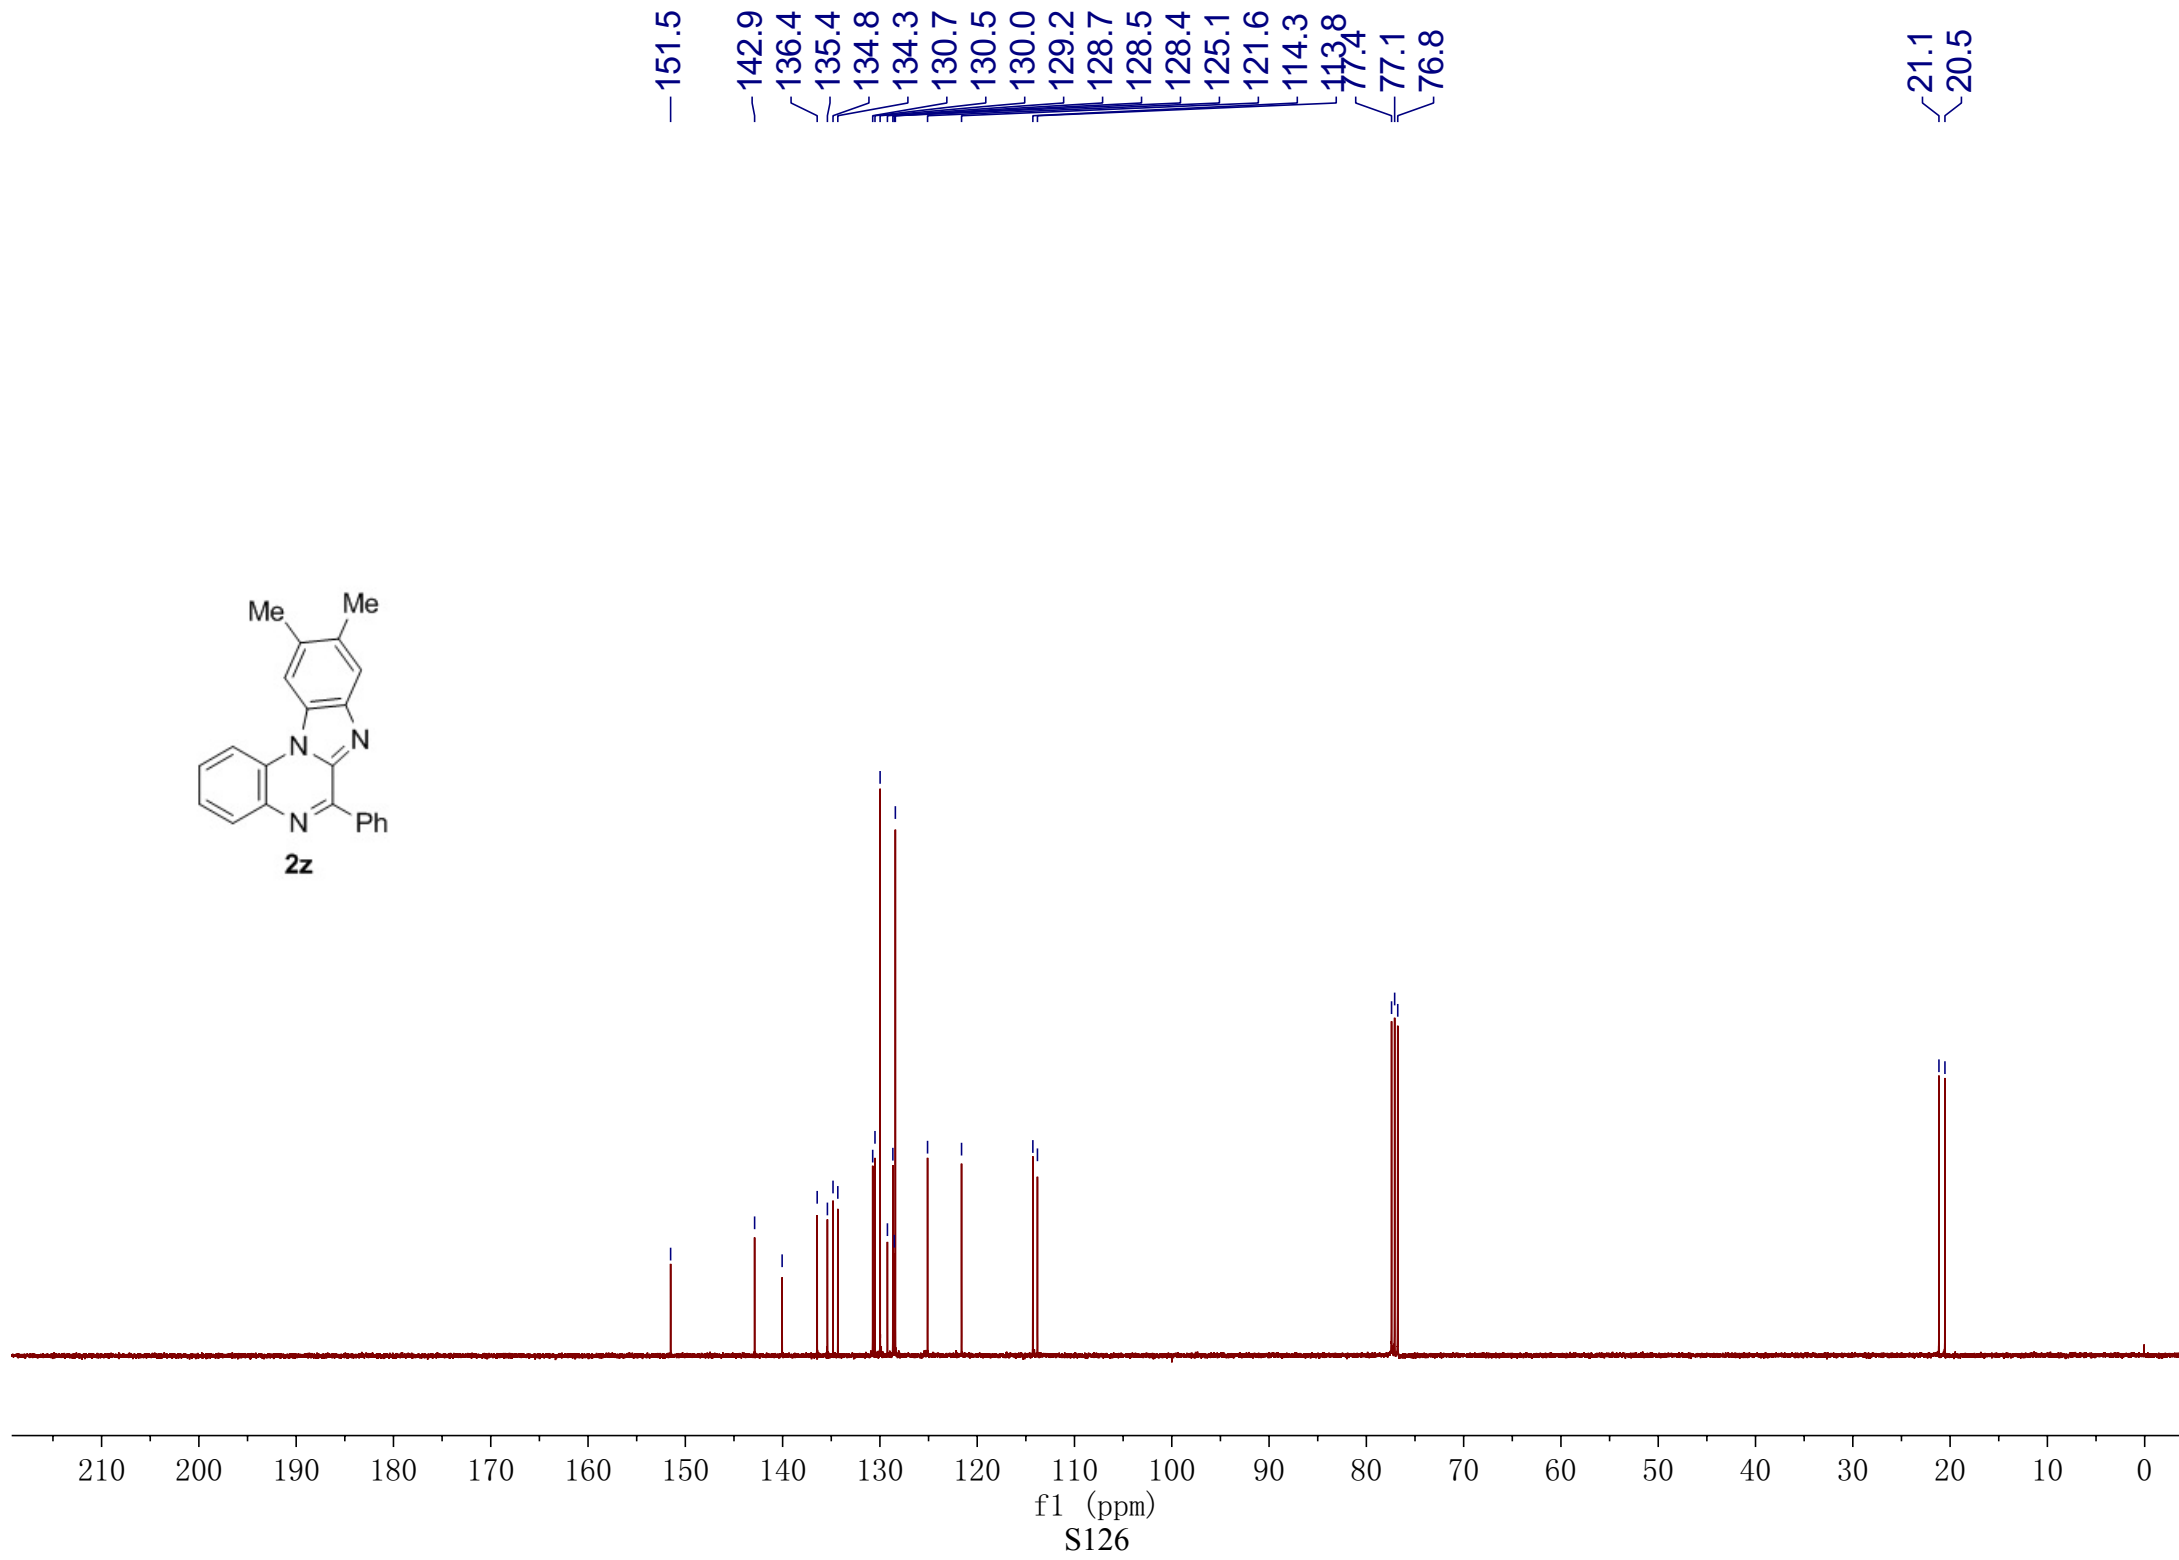

Supplement: d0qo01101k1.pdf [file d0qo01101k1.pdf]
